# Supplementary material for: Knock-Down of the Phosphoserine Phosphatase Gene Effects Rather N- Than S-Metabolism in Arabidopsis thaliana
Source: Front Plant Sci. 2018 Dec 11;9:1830. doi: 10.3389/fpls.2018.01830 (PMC6297848; doi:10.3389/fpls.2018.01830)
Supplement: Supplementary file 1 [file Data_Sheet_1.xlsx]

## Sheet: SD1_Transcripts
Supplemental Dataset S1. Quantitative information and annotation for all reads mapped onto the reference genome of Arabidopsis thaliana.
Illumina reads were quantified by mapping against the Arabidopsis TAIR10 reference transcriptome including primary and secondary transcripts (http://www.arabidopsis.org/) using Kallisto v 0.43.0 (Bray et al., 2016) in default mode with 30 times bootstrapping for sleuth. TAIR10 annotation (columns B and C) was downloaded at (http://www.arabidopsis.org/). Kallisto provides mean velues and standard …
TAIR10 Info			Araport Info		Mapman	Transcripts presented in Figures 1-4			Raw read count of each biological replicate (n = 3) determined with kallisto																	Normalized transcript level (tpm, transcripts per million) of each biological replicate (n = 3) determined with kallisto																	tpm means						tpm standard deviations
									Wild type						psp-17						psp-18					Wild type						psp-17						psp-18
									Day			Night			Day			Night			Day			Night		Day			Night			Day			Night			Day			Night
AGI	curatorSummary	computationalDescription	name	Description	Mapman Bin	name	Isogene	category	counts_1_WT_Day_1	counts_1_WT_Day_2	counts_1_WT_Day_3	counts_1_WT_Night_1	counts_1_WT_Night_2	counts_1_WT_Night_3	counts_3_psp-17_Day_1	counts_3_psp-17_Day_2	counts_3_psp-17_Day_3	counts_3_psp-17_Night_1	counts_3_psp-17_Night_2	counts_3_psp-17_Night_3	counts_4_psp-18_Day_1	counts_4_psp-18_Day_2	counts_4_psp-18_Day_3	counts_4_psp-18_Night_2	counts_4_psp-18_Night_3	tpm_1_WT_Day_1	tpm_1_WT_Day_2	tpm_1_WT_Day_3	tpm_1_WT_Night_1	tpm_1_WT_Night_2	tpm_1_WT_Night_3	tpm_3_psp-17_Day_1	tpm_3_psp-17_Day_2	tpm_3_psp-17_Day_3	tpm_3_psp-17_Night_1	tpm_3_psp-17_Night_2	tpm_3_psp-17_Night_3	tpm_4_psp-18_Day_1	tpm_4_psp-18_Day_2	tpm_4_psp-18_Day_3	tpm_4_psp-18_Night_2	tpm_4_psp-18_Night_3	tpmMeans_1_WT_Day	tpmMeans_1_WT_Night	tpmMeans_3_psp-17_Day	tpmMeans_3_psp-17_Night	tpmMeans_4_psp-18_Day	tpmMeans_4_psp-18_Night	tpmSD_1_WT_Day
AT1G01010.1		NAC domain containing protein 1 (NAC001); FUNCTIONS IN: sequence-specific DNA binding transcription factor activity; INVOLVED IN: multicellular organismal development, regulation of transcription; LOCATED IN: cellular_component unknown; EXPRESSED IN: 7 plant structures; EXPRESSED DURING: 4 anthesis, C globular stage, petal differentiation and expansion stage; CONTAINS InterPro DOMAIN/s: No apical…	NAC001	NAC domain containing protein 1	development.unspecified				154	178	114	72	98	120	226	220	190	359	239	255	84	165	152	181	174	3.86301	4.7107	2.46087	2.53125	3.44538	3.20312	6.71452	6.11118	6.38248	10.1434	7.8618	7.41384	3.26248	5.6095	5.05638	4.70867	5.13591	3.67819	3.05992	6.40273	8.47301	4.64279	4.92229	1.13624
AT1G01020.1		ARV1; CONTAINS InterPro DOMAIN/s: Arv1-like protein (InterPro:IPR007290); BEST Arabidopsis thaliana protein match is: Arv1-like protein (TAIR:AT4G01510.1); Has 311 Blast hits to 311 proteins in 154 species: Archae - 0; Bacteria - 0; Metazoa - 110; Fungi - 115; Plants - 42; Viruses - 0; Other Eukaryotes - 44 (source: NCBI BLink).	ARV1	ARV1 family protein	lipid metabolism.'exotics' (steroids, squalene etc).sphingolipids				145.687	128.744	162.017	98.4055	120.334	128.326	88.7834	99.325	108.572	108.74	108.897	182.871	78.4619	104.614	114.61	141.713	124.643	3.81585	3.5579	3.6518	3.61243	4.41802	3.57712	2.75416	2.88129	3.80864	3.20979	3.74111	5.55213	3.18266	3.71376	3.98126	3.84954	3.84244	3.67518	3.86919	3.14803	4.16768	3.62589	3.84599	0.130555
AT1G01020.2		ARV1; CONTAINS InterPro DOMAIN/s: Arv1-like protein (InterPro:IPR007290); BEST Arabidopsis thaliana protein match is: Arv1-like protein (TAIR:AT4G01510.1); Has 35333 Blast hits to 34131 proteins in 2444 species: Archae - 798; Bacteria - 22429; Metazoa - 974; Fungi - 991; Plants - 531; Viruses - 0; Other Eukaryotes - 9610 (source: NCBI BLink).	ARV1	ARV1 family protein	lipid metabolism.'exotics' (steroids, squalene etc).sphingolipids				134.313	176.256	192.983	103.594	78.6655	123.674	107.217	108.675	113.428	124.26	138.103	100.129	68.5381	115.386	143.39	170.287	167.357	5.54438	7.68552	6.85465	5.9955	4.56039	5.44365	5.23935	4.97782	6.2805	5.82293	7.4998	4.7978	4.39479	6.45955	7.8594	7.29339	8.15822	6.69485	5.33318	5.49922	6.04018	6.23791	7.72581	1.07948
AT1G01030.1		NGATHA3 (NGA3); CONTAINS InterPro DOMAIN/s: Transcriptional factor B3 (InterPro:IPR003340); BEST Arabidopsis thaliana protein match is: AP2/B3-like transcriptional factor family protein (TAIR:AT4G01500.1); Has 1380 Blast hits to 1379 proteins in 72 species: Archae - 0; Bacteria - 0; Metazoa - 0; Fungi - 0; Plants - 1380; Viruses - 0; Other Eukaryotes - 0 (source: NCBI BLink).	NGA3	AP2/B3-like transcriptional factor family protein	RNA.regulation of transcription.ABI3/VP1-related B3-domain-containing transcription factor family				42	34	57	20	26	25	31	51	26	56	51	26	35	49	39	39	41	0.923206	0.78829	1.07823	0.616094	0.800683	0.584529	0.80715	1.24093	0.765099	1.38444	1.46917	0.66221	1.19045	1.45958	1.13658	0.888977	1.05974	0.929909	0.667102	0.937726	1.17194	1.2622	0.974359	0.145086
AT1G01040.1	Encodes a Dicer homolog. Dicer is a RNA helicase involved in microRNA processing. Mutations in this locus can result in embryo lethality. Embryo shape at seed maturity is globular-elongate. Other mutants convert the floral meristems to an indeterminate state, others yet show defects in ovule development. mRNA is expressed in all shoot tissues. DCL1 is able to produce miRNAs and siRNAs.	dicer-like 1 (DCL1); CONTAINS InterPro DOMAIN/s: Restriction endonuclease, type I, R subunit/Type III, Res subunit (InterPro:IPR006935), Double-stranded RNA-binding (InterPro:IPR001159), Argonaute/Dicer protein, PAZ (InterPro:IPR003100), Ribonuclease III (InterPro:IPR000999), Double-stranded RNA-binding-like (InterPro:IPR014720), DEAD-like helicase, N-terminal (InterPro:IPR014001), DNA/RNA helica…	DCL1	dicer-like 1	RNA.processing.degradation dicer				909.115	783.185	750.843	913.239	831.163	1252.03	733.88	426.452	461.731	1249.48	1276.7	990.899	440.219	703.409	520.233	1271.96	828.215	5.74602	5.21499	4.08441	8.08626	7.34556	8.40078	5.49703	2.97782	3.90073	8.81586	10.5426	7.24637	4.29193	6.02097	4.35417	8.33311	6.13422	5.01514	7.9442	4.12519	8.86828	4.88902	7.23367	0.848641
AT1G01040.2	Encodes a Dicer homolog. Dicer is a RNA helicase involved in microRNA processing. Mutations in this locus can result in embryo lethality. Embryo shape at seed maturity is globular-elongate. Other mutants convert the floral meristems to an indeterminate state, others yet show defects in ovule development. mRNA is expressed in all shoot tissues. DCL1 is able to produce miRNAs and siRNAs.	dicer-like 1 (DCL1); CONTAINS InterPro DOMAIN/s: Restriction endonuclease, type I, R subunit/Type III, Res subunit (InterPro:IPR006935), Double-stranded RNA-binding (InterPro:IPR001159), Argonaute/Dicer protein, PAZ (InterPro:IPR003100), Ribonuclease III (InterPro:IPR000999), Double-stranded RNA-binding-like (InterPro:IPR014720), DEAD-like helicase, N-terminal (InterPro:IPR014001), DNA/RNA helica…	DCL1	dicer-like 1	RNA.processing.degradation dicer				676.885	742.815	729.157	363.761	496.837	562.972	342.12	480.548	518.269	681.519	456.302	768.101	420.805	354.591	448.767	596.036	675.785	4.55766	5.26941	4.22551	3.43133	4.67792	4.02433	2.72995	3.57491	4.66453	5.12362	4.01443	5.98418	4.37099	3.23349	4.00149	4.15995	5.33264	4.68419	4.04453	3.65646	5.04074	3.86866	4.74629	0.533329
AT1G01050.1	Encodes a soluble protein with inorganic pyrophosphatase activity that is highly specific for Mg-inorganic pyrophosphate.	pyrophosphorylase 1 (PPa1); FUNCTIONS IN: inorganic diphosphatase activity; INVOLVED IN: phosphate metabolic process, metabolic process; LOCATED IN: nucleus, membrane, cytoplasm; EXPRESSED IN: 24 plant structures; EXPRESSED DURING: 15 growth stages; CONTAINS InterPro DOMAIN/s: Inorganic pyrophosphatase (InterPro:IPR008162); BEST Arabidopsis thaliana protein match is: pyrophosphorylase 3 (TAIR:AT2…	PPa1	pyrophosphorylase 1	nucleotide metabolism.phosphotransfer and pyrophosphatases.misc				3098	3004	4294	2658	2666	3603	2659	2912	2663	3720	3429	3809	2348.98	2894	2814	3922	3326	144.78	148.355	172.665	174.177	175.092	179.667	147.08	151.109	167.024	197.877	211.046	206.732	170.708	183.457	174.691	190.202	183.777	155.267	176.312	155.071	205.218	176.285	186.989	15.1731
AT1G01060.1	LHY encodes a myb-related putative transcription factor involved in circadian rhythm along with another myb transcription factor CCA1	LATE ELONGATED HYPOCOTYL (LHY); CONTAINS InterPro DOMAIN/s: SANT, DNA-binding (InterPro:IPR001005), Homeodomain-like (InterPro:IPR009057), Myb, DNA-binding (InterPro:IPR014778), HTH transcriptional regulator, Myb-type, DNA-binding (InterPro:IPR017930), Myb-like DNA-binding domain, SHAQKYF class (InterPro:IPR006447); BEST Arabidopsis thaliana protein match is: circadian clock associated 1 (TAIR:AT…	LHY	Homeodomain-like superfamily protein	RNA.regulation of transcription.MYB-related transcription factor family				12678	10528.3	12736.1	4673.7	4851.44	8303.48	5403.52	6681.1	5997.14	6086.67	5582.73	8254.9	6438.36	6943.6	6600.68	8288.07	8583.4	191.46	167.616	165.527	98.8984	102.557	133.268	96.6809	111.592	121.162	103.042	110.341	144.356	150.245	142.061	132.09	129.77	152.193	174.868	111.574	109.812	119.246	141.465	140.982	14.4073
AT1G01060.2	LHY encodes a myb-related putative transcription factor involved in circadian rhythm along with another myb transcription factor CCA1	LATE ELONGATED HYPOCOTYL (LHY); CONTAINS InterPro DOMAIN/s: SANT, DNA-binding (InterPro:IPR001005), Homeodomain-like (InterPro:IPR009057), Myb, DNA-binding (InterPro:IPR014778), HTH transcriptional regulator, Myb-type, DNA-binding (InterPro:IPR017930), Myb-like DNA-binding domain, SHAQKYF class (InterPro:IPR006447); BEST Arabidopsis thaliana protein match is: circadian clock associated 1 (TAIR:AT…	LHY	Homeodomain-like superfamily protein	RNA.regulation of transcription.MYB-related transcription factor family				1221.22	1400.56	1591.22	597.689	226.345	543.62	742.892	987.623	660.604	408.378	357.062	0.288034	947.731	1117.04	806.698	722.841	950.517	17.6808	21.3756	19.8266	12.1249	4.5868	8.36387	12.7432	15.8132	12.7942	6.62592	6.76488	0.00482861	21.2	21.9092	15.4758	10.8501	16.1553	19.6277	8.35852	13.7835	4.46521	19.5283	13.5027	1.85542
AT1G01060.3	LHY encodes a myb-related putative transcription factor involved in circadian rhythm along with another myb transcription factor CCA1	LATE ELONGATED HYPOCOTYL (LHY); CONTAINS InterPro DOMAIN/s: SANT, DNA-binding (InterPro:IPR001005), Homeodomain-like (InterPro:IPR009057), Myb, DNA-binding (InterPro:IPR014778), HTH transcriptional regulator, Myb-type, DNA-binding (InterPro:IPR017930), Myb-like DNA-binding domain, SHAQKYF class (InterPro:IPR006447); BEST Arabidopsis thaliana protein match is: circadian clock associated 1 (TAIR:AT…	LHY	Homeodomain-like superfamily protein	RNA.regulation of transcription.MYB-related transcription factor family				3322.53	3167.48	3442.15	2568.23	2940.62	3976.94	2061.27	1209.04	2793.25	6419.96	4812.89	3772.93	2091.89	2045.81	2342.79	5965.22	3389.13	54.1419	54.4186	48.2722	58.6421	67.0862	68.8838	39.7941	21.7934	60.9002	117.341	102.668	71.2012	52.6869	45.166	50.5931	100.785	64.8595	52.2776	64.8707	40.8292	97.0701	49.482	82.8222	3.47151
AT1G01060.4	LHY encodes a myb-related putative transcription factor involved in circadian rhythm along with another myb transcription factor CCA1	LATE ELONGATED HYPOCOTYL (LHY); CONTAINS InterPro DOMAIN/s: SANT, DNA-binding (InterPro:IPR001005), Myb, DNA-binding (InterPro:IPR014778), Homeodomain-like (InterPro:IPR009057), Myb-like DNA-binding domain, SHAQKYF class (InterPro:IPR006447), HTH transcriptional regulator, Myb-type, DNA-binding (InterPro:IPR017930); BEST Arabidopsis thaliana protein match is: circadian clock associated 1 (TAIR:AT…	LHY	Homeodomain-like superfamily protein	RNA.regulation of transcription.MYB-related transcription factor family				8862.03	8507.17	9766.8	4386.91	4951.01	6771.48	4966.68	5458.95	6321.82	6683.27	6589.36	6888.77	5721.62	7041.82	7123.47	8816.49	6224.86	137.218	138.87	130.148	95.1793	107.315	111.435	91.1122	93.49	130.958	116.026	133.542	123.519	136.908	147.718	146.163	141.538	113.175	135.412	104.643	105.187	124.362	143.596	127.356	4.63298
AT1G01060.5	LHY encodes a myb-related putative transcription factor involved in circadian rhythm along with another myb transcription factor CCA1	LATE ELONGATED HYPOCOTYL (LHY); FUNCTIONS IN: DNA binding, sequence-specific DNA binding transcription factor activity; INVOLVED IN: in 11 processes; EXPRESSED IN: 22 plant structures; EXPRESSED DURING: 13 growth stages; BEST Arabidopsis thaliana protein match is: circadian clock associated 1 (TAIR:AT2G46830.1).	LHY	Homeodomain-like superfamily protein	RNA.regulation of transcription.MYB-related transcription factor family				720.25	865.542	788.773	740.47	1178.59	1413.48	537.64	405.276	508.192	1732.73	1631.96	1523.1	636.4	618.726	622.365	1992.37	1699.1	10.8009	13.6833	10.1797	15.5591	24.7399	22.5269	9.55225	6.72167	10.1951	29.1268	32.0286	26.4482	14.7467	12.57	12.3672	30.9769	29.9152	11.5546	20.942	8.82301	29.2012	13.228	30.446	1.86946
AT1G01070.1	nodulin MtN21-like transporter family protein	nodulin MtN21 /EamA-like transporter family protein; LOCATED IN: membrane; EXPRESSED IN: 17 plant structures; EXPRESSED DURING: 7 growth stages; CONTAINS InterPro DOMAIN/s: Protein of unknown function DUF6, transmembrane (InterPro:IPR000620); BEST Arabidopsis thaliana protein match is: nodulin MtN21 /EamA-like transporter family protein (TAIR:AT1G11460.1); Has 3211 Blast hits to 3199 proteins in …	UMAMIT28	nodulin MtN21 /EamA-like transporter family protein	development.unspecified				581.572	200	431.9	247	215.602	240.564	291.136	207.255	107	206	250	144.848	383	131.702	206	221	282.796	19.3297	7.01748	12.3526	11.5079	10.0536	8.51702	11.458	7.63602	4.76644	7.74244	10.9139	5.58418	19.7421	5.93458	9.08561	7.61955	11.08	12.8999	10.0262	7.95349	8.08017	11.5874	9.34977	6.17433
AT1G01070.2	nodulin MtN21-like transporter family protein	nodulin MtN21 /EamA-like transporter family protein; LOCATED IN: membrane; EXPRESSED IN: 17 plant structures; EXPRESSED DURING: 7 growth stages; CONTAINS InterPro DOMAIN/s: Protein of unknown function DUF6, transmembrane (InterPro:IPR000620); BEST Arabidopsis thaliana protein match is: nodulin MtN21 /EamA-like transporter family protein (TAIR:AT1G11450.2); Has 35333 Blast hits to 34131 proteins i…	UMAMIT28	nodulin MtN21 /EamA-like transporter family protein	development.unspecified				4.42762	0	4.10014	0	8.39786	3.436	8.86439	5.74464	0	0	0	21.1524	0	4.29798	0	0	9.20401	0.133156	0	0.106109	0	0.35419	0.110029	0.315699	0.191435	0	0	0	0.737647	0	0.175217	0	0	0.326069	0.079755	0.15474	0.169045	0.245882	0.0584057	0.163034	0.0703813
AT1G01073.1		unknown protein; FUNCTIONS IN: molecular_function unknown; INVOLVED IN: biological_process unknown; LOCATED IN: endomembrane system; Has 0 Blast hits to 0 proteins in 0 species (source: NCBI BLink).			not assigned.unknown				0	0	0	0	0	0	0	0	0	0	0	0	0	0	0	0	0	0	0	0	0	0	0	0	0	0	0	0	0	0	0	0	0	0	0	0	0	0	0	0	0
AT1G01080.1		RNA-binding (RRM/RBD/RNP motifs) family protein; FUNCTIONS IN: RNA binding, nucleotide binding, nucleic acid binding; INVOLVED IN: biological_process unknown; LOCATED IN: chloroplast stroma, nucleus, chloroplast, chloroplast envelope; EXPRESSED IN: 23 plant structures; EXPRESSED DURING: 13 growth stages; CONTAINS InterPro DOMAIN/s: RNA recognition motif, RNP-1 (InterPro:IPR000504), Nucleotide-bin…	AT1G01080	RNA-binding (RRM/RBD/RNP motifs) family protein	RNA.RNA binding				1590.82	1722.44	2614.79	1785.45	1964.41	2438.51	1238.19	1499.57	1357.86	1667.4	1593.92	1888.89	1205.74	1539.95	1738.05	2549.38	1811.11	52.5118	60.0208	74.2728	82.6152	90.9713	85.74	48.3968	54.8693	60.0718	62.2326	69.1042	72.3205	61.7223	68.9152	76.1303	87.294	70.4701	62.2685	86.4422	54.446	67.8858	68.9226	78.8821	11.0532
AT1G01080.2		RNA-binding (RRM/RBD/RNP motifs) family protein; FUNCTIONS IN: RNA binding, nucleotide binding, nucleic acid binding; INVOLVED IN: biological_process unknown; LOCATED IN: chloroplast; EXPRESSED IN: 23 plant structures; EXPRESSED DURING: 13 growth stages; CONTAINS InterPro DOMAIN/s: RNA recognition motif, RNP-1 (InterPro:IPR000504), Nucleotide-binding, alpha-beta plait (InterPro:IPR012677); BEST A…	AT1G01080	RNA-binding (RRM/RBD/RNP motifs) family protein	RNA.RNA binding				45.1839	66.5628	85.2097	87.5479	47.5911	35.4927	26.8146	47.4339	40.1385	44.5997	65.0764	68.1061	26.2627	7.05108	45.9466	92.6161	114.887	1.48767	2.31352	2.41417	4.04057	2.19826	1.24474	1.04542	1.73115	1.77117	1.66027	2.8141	2.60089	1.34093	0.314738	2.00739	3.16315	4.45871	2.07179	2.49452	1.51591	2.35842	1.22102	3.81093	0.508357
AT3G47340.1	encodes a glutamine-dependent asparagine synthetase, the predicted ASN1 peptide contains a purF-type glutamine-binding domain, and is expressed predominantly in shoot tissues, where light has a negative effect on its mRNA accumulation. Expression is induced within 3 hours of dark treatment, in senescing leaves and treatment with exogenous photosynthesis inhibitor. Induction of gene expression was…	glutamine-dependent asparagine synthase 1 (ASN1); CONTAINS InterPro DOMAIN/s: Rossmann-like alpha/beta/alpha sandwich fold (InterPro:IPR014729), Asparagine synthase (InterPro:IPR001962), Asparagine synthase, glutamine-hydrolyzing (InterPro:IPR006426), Glutamine amidotransferase, type II (InterPro:IPR017932); BEST Arabidopsis thaliana protein match is: asparagine synthetase 2 (TAIR:AT5G65010.1); H…	ASN1	glutamine-dependent asparagine synthase 1	amino acid metabolism.synthesis.aspartate family.asparagine.asparagine synthetase	ASN1	ASN	0	240.404	2639.61	146.957	630	184.969	986.736	465.788	668.7	570.506	949.557	573.552	555.682	197.091	669.696	817.221	832.625	386.647	4.50813	52.197	2.37161	16.5551	4.85754	19.6741	10.3474	13.8752	14.3176	19.9959	14.0865	12.0705	5.71526	17.016	20.3129	16.1898	8.51975	19.6922	13.6956	12.8467	15.3843	14.3481	12.3548	28.1702
AT1G01100.1		60S acidic ribosomal protein family; FUNCTIONS IN: structural constituent of ribosome; INVOLVED IN: translational elongation; LOCATED IN: cytosol, cytosolic ribosome, ribosome, nucleus, plasma membrane; EXPRESSED IN: 25 plant structures; EXPRESSED DURING: 14 growth stages; CONTAINS InterPro DOMAIN/s: Ribosomal protein 60S (InterPro:IPR001813); BEST Arabidopsis thaliana protein match is: 60S acidi…	AT1G01100	60S acidic ribosomal protein family	protein.synthesis.ribosomal protein.eukaryotic.60S subunit.P1				20.0368	20.6642	19.0045	24.9804	26.3755	28.1695	19.5821	24.3801	5.59241	18.7774	5.74186	58.5284	12.294	23.7727	80.6678	51.7857	5.62547	1.77166	1.93718	1.44561	3.10035	3.29496	2.67185	2.04692	2.40647	0.666447	1.92883	0.674287	6.03418	1.70458	2.85567	9.5066	4.75774	0.593651	1.71815	3.02239	1.70661	2.8791	4.68895	2.6757	0.250115
AT1G01100.2		60S acidic ribosomal protein family; FUNCTIONS IN: structural constituent of ribosome; INVOLVED IN: translational elongation; LOCATED IN: cytosol, cytosolic ribosome, ribosome, nucleus, plasma membrane; EXPRESSED IN: 25 plant structures; EXPRESSED DURING: 14 growth stages; CONTAINS InterPro DOMAIN/s: Ribosomal protein 60S (InterPro:IPR001813); BEST Arabidopsis thaliana protein match is: 60S acidi…	AT1G01100	60S acidic ribosomal protein family	protein.synthesis.ribosomal protein.eukaryotic.60S subunit.P1				5824.52	5268.36	6153.34	4398.05	4271.39	4468.37	4041.73	4474	3310.69	4417.87	3960.11	4183.27	2489.7	3726.78	4730.79	5363.64	3726.03	467.845	448.336	425.179	495.72	484.196	384.612	383.851	400.721	358.077	410.601	421.736	391.457	313.046	406.514	506.091	447.503	356.514	447.12	454.843	380.883	407.931	408.55	402.009	21.359
AT1G01100.3		60S acidic ribosomal protein family; FUNCTIONS IN: structural constituent of ribosome; INVOLVED IN: translational elongation; LOCATED IN: cytosol, cytosolic ribosome, ribosome, nucleus, plasma membrane; EXPRESSED IN: 25 plant structures; EXPRESSED DURING: 14 growth stages; CONTAINS InterPro DOMAIN/s: Ribosomal protein 60S (InterPro:IPR001813); BEST Arabidopsis thaliana protein match is: 60S acidi…	AT1G01100	60S acidic ribosomal protein family	protein.synthesis.ribosomal protein.eukaryotic.60S subunit.P1				9.56676	3.13405	3.37159	5.83407	9.37687	3.12409	3.26543	6.19708	9.82772	0	6.14501	14.7898	3.00317	3.45197	3.15395	9.80746	6.34911	0.888695	0.308778	0.269435	0.76079	1.23137	0.311487	0.358558	0.642939	1.23099	0	0.758829	1.60263	0.437812	0.43572	0.390633	0.946764	0.704628	0.488969	0.767882	0.744162	0.787153	0.421388	0.825696	0.346731
AT1G01100.4		60S acidic ribosomal protein family; FUNCTIONS IN: structural constituent of ribosome; INVOLVED IN: translational elongation; LOCATED IN: cytosol, cytosolic ribosome, ribosome, nucleus, plasma membrane; EXPRESSED IN: 25 plant structures; EXPRESSED DURING: 14 growth stages; CONTAINS InterPro DOMAIN/s: Ribosomal protein 60S (InterPro:IPR001813); BEST Arabidopsis thaliana protein match is: 60S acidi…	AT1G01100	60S acidic ribosomal protein family	protein.synthesis.ribosomal protein.eukaryotic.60S subunit.P1				5.37032	0	10.2864	10.1385	0	9.34096	0	0	0	3.35234	0	0	0	0	5.39248	4.76812	0	0.454065	0	0.748151	1.203	0	0.84679	0	0	0	0.328654	0	0	0	0	0.60744	0.418805	0	0.400739	0.683263	0	0.109551	0.20248	0.209402	0.376915
AT1G01110.1		IQ-domain 18 (IQD18); FUNCTIONS IN: molecular_function unknown; LOCATED IN: mitochondrion; EXPRESSED IN: 10 plant structures; EXPRESSED DURING: 6 growth stages; BEST Arabidopsis thaliana protein match is: IQ-domain 17 (TAIR:AT4G00820.1); Has 1112 Blast hits to 678 proteins in 50 species: Archae - 0; Bacteria - 10; Metazoa - 109; Fungi - 16; Plants - 528; Viruses - 4; Other Eukaryotes - 445 (sourc…	IQD18	IQ-domain 18	signalling.calcium				28.5653	2.78787	21.8834	17.1304	7.82168	0	5.48281	0.258915	2.25624	0	0	11.0212	0	0	3.77526	31.4675	5.41429e-07	0.85507	0.0880758	0.563693	0.718745	0.328346	0	0.194358	0.00858778	0.0904884	0	0	0.382549	0	0	0.149922	0.977014	1.90912e-08	0.50228	0.34903	0.0978114	0.127516	0.049974	0.488507	0.387168
AT1G01110.2		IQ-domain 18 (IQD18); FUNCTIONS IN: molecular_function unknown; EXPRESSED IN: 10 plant structures; EXPRESSED DURING: 6 growth stages; CONTAINS InterPro DOMAIN/s: IQ calmodulin-binding region (InterPro:IPR000048); BEST Arabidopsis thaliana protein match is: IQ-domain 17 (TAIR:AT4G00820.1); Has 30201 Blast hits to 17322 proteins in 780 species: Archae - 12; Bacteria - 1396; Metazoa - 17338; Fungi -…	IQD18	IQ-domain 18	signalling.calcium				78.4347	52.2121	95.1166	81.8696	80.1783	114	9.51719	4.74108	4.74376	26	29	18.9788	43	21	33.2247	34.5325	76	1.8541	1.30199	1.93493	2.71226	2.65589	2.86706	0.266474	0.124086	0.150146	0.691801	0.898706	0.519915	1.57337	0.672751	1.04143	0.846544	2.11331	1.69701	2.74507	0.180235	0.703474	1.09585	1.47993	0.344474
AT1G01115.1		unknown protein; FUNCTIONS IN: molecular_function unknown; INVOLVED IN: biological_process unknown; LOCATED IN: endomembrane system; Has 0 Blast hits to 0 proteins in 0 species (source: NCBI BLink).			not assigned.unknown				0	0	0	0	0	0	0	0	0	0	0	0	0	0	0	0	0	0	0	0	0	0	0	0	0	0	0	0	0	0	0	0	0	0	0	0	0	0	0	0	0
AT1G01120.1	Encodes a condensing enzyme KCS1 (3-ketoacyl-CoA synthase 1) which is involved in the critical fatty acid elongation process in wax biosynthesis.	3-ketoacyl-CoA synthase 1 (KCS1); FUNCTIONS IN: fatty acid elongase activity, acyltransferase activity; INVOLVED IN: in 7 processes; LOCATED IN: cytosolic ribosome, endoplasmic reticulum, membrane; EXPRESSED IN: 29 plant structures; EXPRESSED DURING: 13 growth stages; CONTAINS InterPro DOMAIN/s: Thiolase-like (InterPro:IPR016039), Very-long-chain 3-ketoacyl-CoA synthase (InterPro:IPR012392), 3-Ox…	KCS1	3-ketoacyl-CoA synthase 1	lipid metabolism.FA synthesis and FA elongation.beta ketoacyl CoA synthase				5327	3745	4219	1509	1463	1696	2288	2750	2781	2219	1852	1328	3167	2957	2384	3148	2019	117.495	87.1263	80.0819	46.6439	45.2089	39.7909	59.7772	67.1433	82.1177	55.0488	53.5349	33.94	108.09	88.3835	69.716	72.0029	52.3656	94.9011	43.8812	69.6794	47.5079	88.7298	62.1842	19.8814
AT1G01130.1		CONTAINS InterPro DOMAIN/s: CBL-interacting protein kinase (InterPro:IPR020660), Calcium/calmodulin-dependent protein kinase-like (InterPro:IPR020636); BEST Arabidopsis thaliana protein match is: unknown protein (TAIR:AT5G47170.1); Has 176 Blast hits to 176 proteins in 20 species: Archae - 0; Bacteria - 0; Metazoa - 0; Fungi - 0; Plants - 176; Viruses - 0; Other Eukaryotes - 0 (source: NCBI BLink…	AT1G01130	CBL-interacting Serine/Threonine-kinase	not assigned.unknown				81	61	60	58	48	51	46	44	47	75	64	43	59	37	41	102	59	13.9157	11.1781	8.86486	14.016	11.7644	9.4934	9.32167	8.52374	10.9695	15.4998	14.8311	8.68249	16.1601	8.6594	9.45632	18.2506	12.3122	11.3196	11.7579	9.60497	13.0045	11.4253	15.2814	2.52839
AT1G01140.1	Encodes a CBL-interacting protein kinase with similarity to SOS2	CBL-interacting protein kinase 9 (CIPK9); FUNCTIONS IN: protein serine/threonine kinase activity, protein kinase activity, kinase activity, ATP binding; INVOLVED IN: in 6 processes; EXPRESSED IN: 23 plant structures; EXPRESSED DURING: 15 growth stages; CONTAINS InterPro DOMAIN/s: Protein kinase, ATP binding site (InterPro:IPR017441), NAF/FISL domain (InterPro:IPR018451), Serine/threonine-protein …	CIPK9	CBL-interacting protein kinase 9	protein.postranslational modification				1196	2301.43	1560.55	1456.84	1626.53	2005.67	1705.46	1773.94	1819.18	2169.08	1855.94	2173.12	1290.55	1745.81	1681.04	2033.19	1949.9	29.9817	60.8669	33.665	51.1837	57.1467	53.5018	50.6367	49.2446	61.07	61.2463	61.0105	63.14	50.0911	59.3136	55.8846	52.8586	57.517	41.5045	53.9441	53.6504	61.7989	55.0964	55.1878	16.8691
AT1G01140.2	Encodes a CBL-interacting protein kinase with similarity to SOS2	CBL-interacting protein kinase 9 (CIPK9); FUNCTIONS IN: protein serine/threonine kinase activity, protein kinase activity, kinase activity, ATP binding; INVOLVED IN: in 6 processes; EXPRESSED IN: 23 plant structures; EXPRESSED DURING: 15 growth stages; CONTAINS InterPro DOMAIN/s: Protein kinase, ATP binding site (InterPro:IPR017441), Serine/threonine-protein kinase domain (InterPro:IPR002290), NA…	CIPK9	CBL-interacting protein kinase 9	protein.postranslational modification				0	20.2739	47.2457	9.10191	8.95747	15.3287	30.2358	21.3939	20.6135	49.3062	8.78031	44.8574	10.4696	23.2195	0	26.5652	9.29468	0	0.53445	1.01591	0.318744	0.313689	0.407569	0.894824	0.591963	0.689749	1.38765	0.287696	1.2991	0.40504	0.78632	0	0.688399	0.273275	0.516787	0.346667	0.725512	0.991482	0.39712	0.480837	0.508185
AT1G01140.3	Encodes a CBL-interacting protein kinase with similarity to SOS2	CBL-interacting protein kinase 9 (CIPK9); FUNCTIONS IN: protein serine/threonine kinase activity, protein kinase activity, kinase activity, ATP binding; INVOLVED IN: in 6 processes; EXPRESSED IN: 23 plant structures; EXPRESSED DURING: 15 growth stages; CONTAINS InterPro DOMAIN/s: Protein kinase, ATP binding site (InterPro:IPR017441), Serine/threonine-protein kinase domain (InterPro:IPR002290), NA…	CIPK9	CBL-interacting protein kinase 9	protein.postranslational modification				10.9951	18.2925	19.2083	11.059	10.5091	0	8.30506	15.6631	9.20868	37.6111	9.27792	10.0185	16.9777	9.97112	8.95595	30.2421	8.80508	0.27367	0.480347	0.411431	0.385778	0.366598	0	0.244835	0.431709	0.306936	1.05436	0.302817	0.289015	0.654266	0.336359	0.295613	0.780642	0.257872	0.388483	0.250792	0.327827	0.548731	0.428746	0.519257	0.105232
AT1G01150.1		Homeodomain-like protein with RING/FYVE/PHD-type zinc finger domain; FUNCTIONS IN: DNA binding, zinc ion binding; INVOLVED IN: regulation of transcription; EXPRESSED IN: 8 plant structures; EXPRESSED DURING: 4 anthesis, petal differentiation and expansion stage, E expanded cotyledon stage, D bilateral stage; CONTAINS InterPro DOMAIN/s: Homeodomain-like (InterPro:IPR009057), Zinc finger, PHD-type,…	AT1G01150	Homeodomain-like protein with RING/FYVE/PHD-type zinc finger domain-containing protein	RNA.regulation of transcription.MYB domain transcription factor family				4	4	4	4	2	2	11	2	0	8	1	4	3	5	3	4	2	0.150165	0.158577	0.129215	0.210518	0.105395	0.0800224	0.488916	0.0832747	0	0.340323	0.0493515	0.174248	0.174815	0.254525	0.1495	0.155789	0.0885926	0.145986	0.131978	0.19073	0.187974	0.192947	0.122191	0.0151206
AT1G01160.1	Arabidopsis thaliana GRF1-interacting factor 2 (GIF2) mRNA	GRF1-interacting factor 2 (GIF2); CONTAINS InterPro DOMAIN/s: SSXT (InterPro:IPR007726); BEST Arabidopsis thaliana protein match is: GRF1-interacting factor 3 (TAIR:AT4G00850.1); Has 425 Blast hits to 425 proteins in 91 species: Archae - 0; Bacteria - 4; Metazoa - 291; Fungi - 20; Plants - 89; Viruses - 0; Other Eukaryotes - 21 (source: NCBI BLink).	GIF2	GRF1-interacting factor 2	RNA.regulation of transcription.General Transcription				488.715	493.42	533.874	358.871	397.369	620.617	352.089	344.377	267.036	562.995	452.153	496.968	241.835	359.89	416.438	545.034	458.478	21.0765	22.481	19.8111	21.6997	24.0725	28.546	17.9743	16.4837	15.4503	27.5875	25.6626	24.8826	16.2067	21.0504	23.8502	24.3895	23.3591	21.1229	24.7727	16.6361	26.0442	20.3691	23.8743	1.33555
AT1G01160.2	Arabidopsis thaliana GRF1-interacting factor 2 (GIF2) mRNA	GRF1-interacting factor 2 (GIF2); FUNCTIONS IN: protein binding, transcription coactivator activity; INVOLVED IN: cell proliferation, leaf development; LOCATED IN: nucleus; EXPRESSED IN: 22 plant structures; EXPRESSED DURING: 13 growth stages; CONTAINS InterPro DOMAIN/s: SSXT (InterPro:IPR007726); BEST Arabidopsis thaliana protein match is: GRF1-interacting factor 3 (TAIR:AT4G00850.1); Has 35 Bla…	GIF2	GRF1-interacting factor 2	RNA.regulation of transcription.General Transcription				55.8908	57.764	86.2792	64.9284	45.1702	83.1893	26.2473	58.2855	67.5988	50.7643	70.214	69.5763	67.4906	42.9389	42.4855	63.9155	79.9035	2.20334	2.40509	2.92674	3.5885	2.50021	3.4961	1.22499	2.54904	3.57389	2.26979	3.64014	3.1833	4.13139	2.29549	2.22359	2.6142	3.71831	2.51172	3.19494	2.44931	3.03108	2.88349	3.16626	0.373303
AT1G01170.1		Protein of unknown function (DUF1138); FUNCTIONS IN: molecular_function unknown; INVOLVED IN: response to stress; LOCATED IN: mitochondrion, membrane; EXPRESSED IN: 23 plant structures; EXPRESSED DURING: 13 growth stages; CONTAINS InterPro DOMAIN/s: Protein of unknown function DUF1138 (InterPro:IPR009515); BEST Arabidopsis thaliana protein match is: Protein of unknown function (DUF1138) (TAIR:AT4…	AT1G01170	ozone-responsive stress-like protein (DUF1138)	stress.abiotic.unspecified				1217.86	1060.65	1353.93	750.8	780.411	1095.45	626.416	800.031	681.481	996.358	838.574	995.944	608.662	795.773	761.476	1274.49	838.831	128.951	119.26	123.346	111.658	117.023	124.718	78.3887	94.786	97.4273	123.648	118.359	123.192	101.429	114.575	107.636	140.308	106.437	123.852	117.8	90.2007	121.733	107.88	123.373	4.8653
AT1G01170.2		Protein of unknown function (DUF1138); FUNCTIONS IN: molecular_function unknown; INVOLVED IN: response to stress; LOCATED IN: membrane; EXPRESSED IN: 23 plant structures; EXPRESSED DURING: 13 growth stages; CONTAINS InterPro DOMAIN/s: Protein of unknown function DUF1138 (InterPro:IPR009515); BEST Arabidopsis thaliana protein match is: Protein of unknown function (DUF1138) (TAIR:AT4G00860.1); Has …	AT1G01170	ozone-responsive stress-like protein (DUF1138)	stress.abiotic.unspecified				14.539	26.162	18.921	23.4011	28.0497	24.7394	23.248	9.30665	22.8843	28.8827	16.0587	26.5115	19.013	19.3979	12.6008	29.5626	27.787	1.59158	3.04278	1.78247	3.59914	4.35141	2.91393	3.00806	1.14074	3.38438	3.71206	2.34553	3.39224	3.27841	2.88849	1.84239	3.36582	3.64896	2.13894	3.62149	2.51106	3.14994	2.66976	3.50739	0.788543
AT1G01180.1		S-adenosyl-L-methionine-dependent methyltransferases superfamily protein; FUNCTIONS IN: methyltransferase activity; INVOLVED IN: lipid biosynthetic process; EXPRESSED IN: sperm cell, hypocotyl; CONTAINS InterPro DOMAIN/s: Rhamnosyl O-methyltransferase/Cephalosporin hydroxylase (InterPro:IPR007072); Has 274 Blast hits to 274 proteins in 51 species: Archae - 0; Bacteria - 75; Metazoa - 2; Fungi - 0…	AT1G01180	S-adenosyl-L-methionine-dependent methyltransferases superfamily protein	not assigned.unknown				231	281	246	228	247	320	142	212	181	445	353	360	191	244	206	434	327	8.68897	11.1619	7.96221	12.0229	13.0418	12.8287	6.32377	8.84442	9.12884	18.9681	17.4553	15.7131	11.1518	12.4451	10.2858	16.9362	14.5134	9.27103	12.6311	8.09901	17.3788	11.2942	15.7248	1.67738
AT1G01190.1	member of CYP78A	\cytochrome P450, family 78, subfamily A, polypeptide 8\" (CYP78A8); FUNCTIONS IN: electron carrier activity, monooxygenase activity, iron ion binding, oxygen binding, heme binding; INVOLVED IN: oxidation reduction; LOCATED IN: endomembrane system; EXPRESSED IN: 6 plant structures; EXPRESSED DURING: LP.10 ten leaves visible, LP.02 two leaves visible, LP.12 twelve leaves visible; CONTAINS InterPro…	CYP78A8	cytochrome P450, family 78, subfamily A, polypeptide 8	misc.cytochrome P450				40	40	87	35	29	16	19	23	3	33	27	5	25	15	10	32	27	1.05847	1.11683	1.98113	1.29807	1.07572	0.450612	0.595464	0.674092	0.106324	0.98425	0.937175	0.153371	1.02457	0.537984	0.350959	0.878216	0.840965	1.38548	0.941467	0.458627	0.691599	0.637838	0.859591	0.516676
AT1G01200.1		RAB GTPase homolog A3 (RABA3); FUNCTIONS IN: GTP binding; INVOLVED IN: protein transport, small GTPase mediated signal transduction; LOCATED IN: endosome, nucleus, cell plate; EXPRESSED IN: lateral root cap, hypocotyl, root, flower, epidermis; EXPRESSED DURING: petal differentiation and expansion stage; CONTAINS InterPro DOMAIN/s: Ras GTPase (InterPro:IPR001806), Small GTP-binding protein (InterP…	RABA3	RAB GTPase homolog A3	signalling.G-proteins				84	66	125	65	49	113	43	47	31	64	42	59	44	49	67	88	80	3.89725	3.23584	4.99007	4.22861	3.19476	5.59393	2.36135	2.42121	1.93023	3.3792	2.56615	3.17898	3.17433	3.08375	4.12917	4.23681	4.38813	4.04105	4.3391	2.2376	3.04144	3.46242	4.31247	0.885912
AT1G01210.1		DNA-directed RNA polymerase, subunit M, archaeal; FUNCTIONS IN: in 6 functions; INVOLVED IN: RNA elongation, regulation of transcription, DNA-dependent, transcription, regulation of transcription; LOCATED IN: nucleus; CONTAINS InterPro DOMAIN/s: Zinc finger, TFIIS-type (InterPro:IPR001222), DNA-directed RNA polymerase, M/15kDa subunit (InterPro:IPR001529), DNA-directed RNA polymerase, subunit M, …	AT1G01210	DNA-directed RNA polymerase, subunit M, archaeal	RNA.regulation of transcription.putative transcription regulator				324	352	378.742	171	150	223	203	262	238	247	202	247	155	247	347	276.641	190.599	26.8642	30.9276	27.0138	19.897	17.5579	19.8203	19.8996	24.2313	26.5788	23.7273	22.2176	23.8648	20.1283	27.8144	38.3267	23.8272	18.8361	28.2685	19.0917	23.5699	23.2699	28.7565	21.3316	2.30403
AT1G01220.1	Encodes a bifunctional enzyme that has both L-fucokinase and GDP-L-fucose pyrophosphorylase activities. It catalyzes the two steps of the L-fucose salvage pathway for the generation of activated GDP-L-fucose. This pathway seems to be of minor importance for cell wall polysaccharide biosynthesis compared to the de novo GDP-L-fucose biosynthesis pathway in Arabidopsis.	L-fucokinase/GDP-L-fucose pyrophosphorylase (FKGP); FUNCTIONS IN: fucose-1-phosphate guanylyltransferase activity, fucokinase activity, ATP binding, galactokinase activity; INVOLVED IN: GDP-L-fucose salvage; LOCATED IN: cytoplasm; EXPRESSED IN: 22 plant structures; EXPRESSED DURING: 13 growth stages; CONTAINS InterPro DOMAIN/s: Mevalonate/galactokinase (InterPro:IPR006206), Ribosomal protein S5 d…	FKGP	L-fucokinase/GDP-L-fucose pyrophosphorylase	cell wall.precursor synthesis.NDP sugar pyrophosphorylase.GDP fucose and fucokinase				1022	1009	1218	1093	1096	1454	754	709	741	1366	1191	1309	575	856	791	1543	1215	11.6542	12.1264	11.9536	17.463	17.4867	17.613	10.188	8.93788	11.3001	17.431	17.7619	17.2791	10.1246	13.2222	11.9492	18.2409	16.2541	11.9114	17.5209	10.142	17.4907	11.7653	17.2475	0.238912
AT1G01225.1		NC domain-containing protein-related; CONTAINS InterPro DOMAIN/s: NC (InterPro:IPR007053); BEST Arabidopsis thaliana protein match is: NC domain-containing protein-related (TAIR:AT4G00905.1); Has 173 Blast hits to 172 proteins in 34 species: Archae - 0; Bacteria - 24; Metazoa - 5; Fungi - 0; Plants - 139; Viruses - 0; Other Eukaryotes - 5 (source: NCBI BLink).	AT1G01225	NC domain-containing protein-like protein	not assigned.no ontology				73	44	66	47	44	73	47	24	16	54	49	53	43	36	30	76	57	3.22027	2.05074	2.50517	2.90703	2.72684	3.43499	2.4542	1.1752	0.947012	2.70792	2.84526	2.71462	2.9482	2.15395	1.75761	3.47882	2.97121	2.59206	3.02295	1.52547	2.75593	2.28659	3.22501	0.589587
AT1G01230.1		ORMDL family protein; FUNCTIONS IN: molecular_function unknown; INVOLVED IN: protein folding; LOCATED IN: integral to membrane, endoplasmic reticulum; EXPRESSED IN: 24 plant structures; EXPRESSED DURING: 15 growth stages; CONTAINS InterPro DOMAIN/s: ORMDL (InterPro:IPR007203); BEST Arabidopsis thaliana protein match is: ORMDL family protein (TAIR:AT5G42000.1); Has 538 Blast hits to 538 proteins i…	AT1G01230	ORMDL family protein	protein.folding				616	605	662	493	469	760	453	471	402	690	676	715	296	437	449	802	637	34.875	36.2236	32.2463	39.1458	37.3616	45.9696	30.3463	29.646	30.5757	44.6783	50.503	47.0553	26.1089	33.5734	33.7935	47.1315	42.7335	34.4483	40.8257	30.1893	47.4122	31.1586	44.9325	2.02269
AT1G01240.1		unknown protein; INVOLVED IN: N-terminal protein myristoylation; EXPRESSED IN: 17 plant structures; EXPRESSED DURING: 11 growth stages; BEST Arabidopsis thaliana protein match is: unknown protein (TAIR:AT2G46550.1); Has 95 Blast hits to 78 proteins in 16 species: Archae - 0; Bacteria - 2; Metazoa - 11; Fungi - 0; Plants - 80; Viruses - 0; Other Eukaryotes - 2 (source: NCBI BLink).	AT1G01240	transmembrane protein	not assigned.unknown				254.137	242.771	255.039	212.401	158.848	307.034	160.136	158.358	112.282	447.343	279.952	336.583	93.6665	219.246	183.375	332.573	273.688	8.6176	8.69097	7.44181	10.0963	7.55763	11.0912	6.42968	5.95298	5.10328	17.1589	12.4704	13.2393	4.92646	10.0795	8.25178	11.6985	10.9417	8.25013	9.58171	5.82865	14.2895	7.75258	11.3201	0.700983
AT1G01240.2		unknown protein; BEST Arabidopsis thaliana protein match is: unknown protein (TAIR:AT2G46550.1); Has 35333 Blast hits to 34131 proteins in 2444 species: Archae - 798; Bacteria - 22429; Metazoa - 974; Fungi - 991; Plants - 531; Viruses - 0; Other Eukaryotes - 9610 (source: NCBI BLink).	AT1G01240	transmembrane protein	not assigned.unknown				61.1889	33.8209	17.7202	18.6967	50.8336	24.2942	34.7704	7.31139	35.5075	41.1283	47.0218	6.58074	60.3435	28.3534	26.8438	33.6479	31.2231	1.93848	1.13097	0.483077	0.830262	2.25893	0.819672	1.3044	0.256711	1.5074	1.47229	1.95602	0.241784	2.96385	1.21771	1.12836	1.10571	1.16563	1.18418	1.30295	1.02284	1.22336	1.76997	1.13567	0.729159
AT1G01240.3		unknown protein; BEST Arabidopsis thaliana protein match is: unknown protein (TAIR:AT2G46550.1); Has 35333 Blast hits to 34131 proteins in 2444 species: Archae - 798; Bacteria - 22429; Metazoa - 974; Fungi - 991; Plants - 531; Viruses - 0; Other Eukaryotes - 9610 (source: NCBI BLink).	AT1G01240	transmembrane protein	not assigned.unknown				36.6746	37.4079	30.2413	22.902	20.3183	44.6714	20.0936	19.3309	19.21	47.5285	33.0263	77.8358	19.99	20.4006	32.7811	79.7789	66.0892	0.789934	0.84983	0.560551	0.691294	0.613094	1.0234	0.512664	0.460873	0.553897	1.15113	0.93218	1.9425	0.666184	0.595447	0.936097	1.78191	1.67371	0.733438	0.775929	0.509145	1.34194	0.732576	1.72781	0.152691
AT1G01250.1	encodes a member of the DREB subfamily A-4 of ERF/AP2 transcription factor family. The protein contains one AP2 domain. There are 17 members in this subfamily including TINY.	Integrase-type DNA-binding superfamily protein; FUNCTIONS IN: DNA binding, sequence-specific DNA binding transcription factor activity; INVOLVED IN: regulation of transcription, DNA-dependent; LOCATED IN: nucleus, chloroplast; EXPRESSED IN: 10 plant structures; EXPRESSED DURING: 6 growth stages; CONTAINS InterPro DOMAIN/s: DNA-binding, integrase-type (InterPro:IPR016177), Pathogenesis-related tra…	AT1G01250	Integrase-type DNA-binding superfamily protein	RNA.regulation of transcription.AP2/EREBP, APETALA2/Ethylene-responsive element binding protein family				141	105	272	83	91	187	72	74	71	49	84	91	51	84	80	110	110	7.89007	6.21343	13.0955	6.51386	7.1645	11.1787	4.76735	4.6033	5.33713	3.13496	6.20184	5.91896	4.44568	6.37838	5.9509	6.38924	7.29266	9.06633	8.28569	4.90259	5.08525	5.59165	6.84095	3.58865
AT1G01260.1		basic helix-loop-helix (bHLH) DNA-binding superfamily protein; FUNCTIONS IN: DNA binding, sequence-specific DNA binding transcription factor activity; INVOLVED IN: regulation of transcription; LOCATED IN: nucleus; EXPRESSED IN: 24 plant structures; EXPRESSED DURING: 15 growth stages; CONTAINS InterPro DOMAIN/s: Helix-loop-helix DNA-binding domain (InterPro:IPR001092), Helix-loop-helix DNA-binding…	AT1G01260	basic helix-loop-helix (bHLH) DNA-binding superfamily protein	RNA.regulation of transcription.bHLH,Basic Helix-Loop-Helix family				213.517	285.209	252.248	142.772	108.506	211.826	158.71	134.111	125.964	217.843	211.817	244.843	159.632	190.93	177.31	135.728	246.676	3.39189	4.77671	3.44859	3.17805	2.41307	3.5766	2.98703	2.35652	2.67721	3.88081	4.40452	4.50426	3.91916	4.10921	3.7327	2.23552	4.6017	3.8724	3.05591	2.67359	4.2632	3.92036	3.41861	0.783671
AT1G01260.2		basic helix-loop-helix (bHLH) DNA-binding superfamily protein; FUNCTIONS IN: DNA binding, sequence-specific DNA binding transcription factor activity; INVOLVED IN: regulation of transcription; LOCATED IN: nucleus; EXPRESSED IN: 24 plant structures; EXPRESSED DURING: 15 growth stages; CONTAINS InterPro DOMAIN/s: Helix-loop-helix DNA-binding domain (InterPro:IPR001092), Helix-loop-helix DNA-binding…	AT1G01260	basic helix-loop-helix (bHLH) DNA-binding superfamily protein	RNA.regulation of transcription.bHLH,Basic Helix-Loop-Helix family				107.003	37.3547	150.166	64.3139	69.226	42.9808	97.3833	102.915	119.352	137.033	96.8771	77.9765	24.994	48.0327	42.4258	194.659	94.2762	1.85249	0.681878	2.23733	1.56022	1.67808	0.791031	1.99733	1.97111	2.7649	2.66225	2.19599	1.56353	0.668934	1.12667	0.973458	3.49423	1.91725	1.59057	1.34311	2.24445	2.14059	0.923021	2.70574	0.81013
AT1G01260.3		basic helix-loop-helix (bHLH) DNA-binding superfamily protein; FUNCTIONS IN: DNA binding, sequence-specific DNA binding transcription factor activity; INVOLVED IN: regulation of transcription; LOCATED IN: nucleus; EXPRESSED IN: 24 plant structures; EXPRESSED DURING: 15 growth stages; CONTAINS InterPro DOMAIN/s: Helix-loop-helix DNA-binding domain (InterPro:IPR001092), Helix-loop-helix DNA-binding…	AT1G01260	basic helix-loop-helix (bHLH) DNA-binding superfamily protein	RNA.regulation of transcription.bHLH,Basic Helix-Loop-Helix family				50.4798	107.436	63.5866	53.914	27.268	152.193	47.9066	29.9745	31.6838	92.1239	13.3059	46.1807	58.3741	64.0372	82.2644	58.6135	13.0476	0.802243	1.80009	0.869678	1.2006	0.606665	2.57078	0.902004	0.526913	0.673679	1.64184	0.276797	0.849916	1.43375	1.37878	1.73253	0.965801	0.243502	1.15734	1.45935	0.700865	0.922851	1.51502	0.604652	0.557661
AT1G01270.1		tRNA-Gln (anticodon: CTG)	AT1G01270	tRNA-Gln	protein.synthesis.transfer RNA.nucleus.tRNA-Gln				0	0	0	0	0	0	0	0	0	0	0	0	0	0	0	0	0	0	0	0	0	0	0	0	0	0	0	0	0	0	0	0	0	0	0	0	0	0	0	0	0
AT1G01280.1	member of CYP703A CYP703A2 is expressed specifically in anthers of land plants, catalyzing the in-chain hydroxylation at the C-7 position of medium-chain saturated fatty acids (lauric acid in-chain hydroxylase) which is involved in pollen development (sporopollenin synthesis).	\cytochrome P450, family 703, subfamily A, polypeptide 2\" (CYP703A2); FUNCTIONS IN: oxidoreductase activity, acting on paired donors, with incorporation or reduction of molecular oxygen, NADH or NADPH as one donor, and incorporation of one atom of oxygen, oxygen binding; INVOLVED IN: medium-chain fatty acid metabolic process, pollen wall assembly, medium-chain fatty acid biosynthetic process, sp…	CYP703A2	cytochrome P450, family 703, subfamily A, polypeptide 2	misc.cytochrome P450				0	0	1	0	0	0	0	0	0	0	0	0	0	0	0	0	0	0	0	0.0228658	0	0	0	0	0	0	0	0	0	0	0	0	0	0	0.00762193	0	0	0	0	0	0.0132016
AT1G01290.1	COFACTOR OF NITRATE REDUCTASE AND XANTHINE DEHYDROGENASE 3. Encodes a protein involved in molybdenum cofactor biosynthesis. Homologous to E.coli MoaC. Expression is low in all tissues examined, except in roots. Appears to have targeting signals for chloroplast or mitochondria	cofactor of nitrate reductase and xanthine dehydrogenase 3 (CNX3); CONTAINS InterPro DOMAIN/s: Molybdopterin cofactor biosynthesis C (MoaC) domain (InterPro:IPR002820); Has 5242 Blast hits to 5240 proteins in 1916 species: Archae - 213; Bacteria - 3669; Metazoa - 104; Fungi - 75; Plants - 45; Viruses - 0; Other Eukaryotes - 1136 (source: NCBI BLink).	CNX3	cofactor of nitrate reductase and xanthine dehydrogenase 3	Co-factor and vitamine metabolism.molybdenum cofactor				87.9905	90.6235	117.315	58.4866	57.9731	82.064	74.5252	114.826	97.6012	88.9503	71.1691	79.6673	77.0949	67.898	78.9982	109.931	72.6252	3.65568	3.9772	4.19389	3.4068	3.38265	3.63561	3.66533	5.29376	5.43928	4.19578	3.89008	3.84214	4.9757	3.82568	4.35807	4.73881	3.56338	3.94226	3.47502	4.79946	3.976	4.38648	4.15109	0.270801
AT1G01290.2	COFACTOR OF NITRATE REDUCTASE AND XANTHINE DEHYDROGENASE 3. Encodes a protein involved in molybdenum cofactor biosynthesis. Homologous to E.coli MoaC. Expression is low in all tissues examined, except in roots. Appears to have targeting signals for chloroplast or mitochondria	cofactor of nitrate reductase and xanthine dehydrogenase 3 (CNX3); CONTAINS InterPro DOMAIN/s: Molybdopterin cofactor biosynthesis C (MoaC) domain (InterPro:IPR002820); Has 5242 Blast hits to 5240 proteins in 1916 species: Archae - 213; Bacteria - 3669; Metazoa - 104; Fungi - 75; Plants - 45; Viruses - 0; Other Eukaryotes - 1136 (source: NCBI BLink).	CNX3	cofactor of nitrate reductase and xanthine dehydrogenase 3	Co-factor and vitamine metabolism.molybdenum cofactor				292.01	290.376	256.685	178.513	185.027	232.936	167.475	163.174	156.399	237.05	233.831	253.333	117.905	183.102	179.002	254.069	179.375	13.0005	13.6592	9.83299	11.1435	11.5733	11.0625	8.82571	8.06428	9.34287	11.9994	13.7043	13.0959	8.15926	11.0567	10.5844	11.7373	9.43742	12.1642	11.2598	8.74429	12.9332	9.93345	10.5874	2.0456
AT1G01300.1		Eukaryotic aspartyl protease family protein; FUNCTIONS IN: aspartic-type endopeptidase activity; INVOLVED IN: proteolysis, response to karrikin; LOCATED IN: membrane, plant-type cell wall; EXPRESSED IN: 22 plant structures; EXPRESSED DURING: 13 growth stages; CONTAINS InterPro DOMAIN/s: Peptidase aspartic (InterPro:IPR021109), Peptidase aspartic, catalytic (InterPro:IPR009007), Peptidase A1 (Inte…	AT1G01300	Eukaryotic aspartyl protease family protein	protein.degradation.aspartate protease				1232	1071	1318	1178	1158	1479	1238	891	812	1219	1194	1106	813	821	724	1255	1413	28.4258	26.0667	26.1699	38.0913	37.4376	36.3034	33.8339	22.7598	25.0843	31.6498	36.1121	29.5716	29.0323	25.6712	22.1495	30.0287	38.3455	26.8875	37.2774	27.226	32.4445	25.6177	34.1871	1.33323
AT1G01305.1		unknown protein; FUNCTIONS IN: molecular_function unknown; INVOLVED IN: biological_process unknown; LOCATED IN: endomembrane system; Has 30201 Blast hits to 17322 proteins in 780 species: Archae - 12; Bacteria - 1396; Metazoa - 17338; Fungi - 3422; Plants - 5037; Viruses - 0; Other Eukaryotes - 2996 (source: NCBI BLink).	AT1G01305	hypothetical protein	not assigned.unknown				0	0	0	0	0	0	0	0	0	0	0	0	0	0	0	0	0	0	0	0	0	0	0	0	0	0	0	0	0	0	0	0	0	0	0	0	0	0	0	0	0
AT1G01310.1		CAP (Cysteine-rich secretory proteins, Antigen 5, and Pathogenesis-related 1 protein) superfamily protein; FUNCTIONS IN: molecular_function unknown; INVOLVED IN: biological_process unknown; LOCATED IN: extracellular region; EXPRESSED IN: 6 plant structures; EXPRESSED DURING: L mature pollen stage, M germinated pollen stage, 4 anthesis, petal differentiation and expansion stage; CONTAINS InterPro …	AT1G01310	CAP (Cysteine-rich secretory proteins, Antigen 5, and Pathogenesis-related 1 protein) superfamily protein	stress.abiotic.unspecified				0	0	1	0	1	1	0	0	0	0	0	2	1	0	0	0	3	0	0	0.0401622	0	0.0655961	0.0498053	0	0	0	0	0	0.108417	0.0725846	0	0	0	0.165561	0.0133874	0.0384671	0	0.036139	0.0241949	0.0827805	0.0231877
AT1G01320.1		Tetratricopeptide repeat (TPR)-like superfamily protein; FUNCTIONS IN: binding; LOCATED IN: cellular_component unknown; EXPRESSED IN: 24 plant structures; EXPRESSED DURING: 14 growth stages; CONTAINS InterPro DOMAIN/s: Tetratricopeptide-like helical (InterPro:IPR011990), Tetratricopeptide repeat-containing (InterPro:IPR013026), Tetratricopeptide repeat (InterPro:IPR019734); BEST Arabidopsis thali…	AT1G01320	Tetratricopeptide repeat (TPR)-like superfamily protein	not assigned.no ontology.tetratricopeptide repeat (TPR)				9726.1	8700.08	11431.6	6721.31	7591.55	8255.97	6328.93	5383.64	6260.22	9326.29	7720.04	8198	5796.46	7265.16	7616.38	9918.87	7254.91	63.9474	60.2638	64.688	61.9093	69.7941	57.6267	49.3135	39.1069	55.0165	68.4593	66.3185	62.3656	58.7902	64.691	66.3133	67.5979	55.8996	62.9664	63.11	47.8123	65.7145	63.2648	61.7488	2.36963
AT1G01320.2		Tetratricopeptide repeat (TPR)-like superfamily protein; FUNCTIONS IN: binding; LOCATED IN: cellular_component unknown; EXPRESSED IN: 24 plant structures; EXPRESSED DURING: 14 growth stages; CONTAINS InterPro DOMAIN/s: Tetratricopeptide-like helical (InterPro:IPR011990), Tetratricopeptide repeat-containing (InterPro:IPR013026), Tetratricopeptide repeat (InterPro:IPR019734); BEST Arabidopsis thali…	AT1G01320	Tetratricopeptide repeat (TPR)-like superfamily protein	not assigned.no ontology.tetratricopeptide repeat (TPR)				7084.9	6592.92	8272.38	4378.69	4761.45	6118.03	3261.07	3619.36	4676.78	5691.71	4885.96	5139	3862.54	4692.84	4962.62	6073.13	4262.09	46.3135	45.4045	46.541	40.0991	43.5226	42.4574	25.2631	26.1395	40.8638	41.5382	41.7303	38.869	38.9494	41.5454	42.9587	41.1503	32.6501	46.0863	42.0264	30.7555	40.7125	41.1512	36.9002	0.601341
AT1G01340.1	member of Cyclic nucleotide gated channel family	cyclic nucleotide gated channel 10 (CNGC10); FUNCTIONS IN: ion channel activity, cyclic nucleotide binding, calmodulin binding; INVOLVED IN: ion transport, transmembrane transport; LOCATED IN: membrane; EXPRESSED IN: 14 plant structures; EXPRESSED DURING: 10 growth stages; CONTAINS InterPro DOMAIN/s: Cyclic nucleotide-binding (InterPro:IPR000595), Ion transport (InterPro:IPR005821), Cyclic nucleo…	CNGC10	cyclic nucleotide gated channel 10	transport.cyclic nucleotide or calcium regulated channels				31.869	65.2446	38.6003	35.2034	25.505	82.6587	28.918	20.4782	62.3258	44.3379	55.9697	149.068	39.2	63.4203	37.1343	79.0272	66.5531	0.543674	1.17357	0.566712	0.841539	0.60921	1.49901	0.584451	0.386477	1.42271	0.848708	1.25012	2.94529	1.03377	1.46587	0.839589	1.39786	1.33362	0.761319	0.983253	0.797879	1.68137	1.11308	1.36574	0.357206
AT1G01340.2	member of Cyclic nucleotide gated channel family	cyclic nucleotide gated channel 10 (CNGC10); FUNCTIONS IN: ion channel activity, cyclic nucleotide binding, calmodulin binding; INVOLVED IN: ion transport, transmembrane transport; LOCATED IN: membrane; EXPRESSED IN: 14 plant structures; EXPRESSED DURING: 10 growth stages; CONTAINS InterPro DOMAIN/s: Cyclic nucleotide-binding (InterPro:IPR000595), Cyclic nucleotide-binding-like (InterPro:IPR01849…	CNGC10	cyclic nucleotide gated channel 10	transport.cyclic nucleotide or calcium regulated channels				158.131	363.755	122.4	213.797	261.495	344.341	284.082	282.522	241.674	699.662	538.03	453.932	84.8	232.58	199.866	442.973	377.447	2.71448	6.58381	1.80822	5.14269	6.28506	6.28362	5.77725	5.36523	5.55115	13.477	12.0925	9.02483	2.2503	5.40927	4.54707	7.88431	7.61078	3.70217	5.90379	5.56454	11.5314	4.06888	7.74754	2.53638
AT1G01350.1		Zinc finger (CCCH-type/C3HC4-type RING finger) family protein; FUNCTIONS IN: zinc ion binding, nucleic acid binding; CONTAINS InterPro DOMAIN/s: Zinc finger, CCCH-type (InterPro:IPR000571), Zinc finger, RING-type, conserved site (InterPro:IPR017907), Zinc finger, RING-type (InterPro:IPR001841); BEST Arabidopsis thaliana protein match is: Zinc finger (CCCH-type/C3HC4-type RING finger) family prote…	AT1G01350	Zinc finger (CCCH-type/C3HC4-type RING finger) family protein	protein.degradation.ubiquitin.E3.RING				552.91	538	552.94	446	438	654	385	440.858	347.921	716	575.946	617	323	403.919	354.93	685	545.861	17.0676	17.5287	14.6878	19.2977	18.9632	21.4981	14.0734	15.0809	14.3907	24.9645	23.3408	22.0868	15.4556	16.9023	14.536	21.9328	19.8526	16.428	19.9197	14.515	23.464	15.6313	20.8927	1.52462
AT1G01355.1		Putative endonuclease or glycosyl hydrolase; FUNCTIONS IN: zinc ion binding; INVOLVED IN: biological_process unknown; LOCATED IN: intracellular; CONTAINS InterPro DOMAIN/s: Zinc finger, C2H2-type (InterPro:IPR007087); BEST Arabidopsis thaliana protein match is: Putative endonuclease or glycosyl hydrolase (TAIR:AT5G35640.1); Has 30201 Blast hits to 17322 proteins in 780 species: Archae - 12; Bacte…	AT1G01355	Putative endonuclease or glycosyl hydrolase	not assigned.unknown				14	26	11	14	8	22	5	7	5	23	22	33	10	9	6	16	29	1.00704	1.98016	0.680697	1.41286	0.811259	1.69398	0.425358	0.560869	0.483925	1.90641	2.09461	2.76324	1.12411	0.879034	0.574432	1.19517	2.48022	1.22263	1.30603	0.490051	2.25475	0.859192	1.8377	0.676026
AT1G01360.1	Encodes RCAR1 (regulatory components of ABA receptor). Interacts with and regulates the type 2C protein phosphatases (PP2Cs) ABI1 and ABI2. Functions as abscisic acid sensor.	regulatory component of ABA receptor 1 (RCAR1); CONTAINS InterPro DOMAIN/s: Polyketide cyclase/dehydrase (InterPro:IPR019587); BEST Arabidopsis thaliana protein match is: PYR1-like 7 (TAIR:AT4G01026.1); Has 395 Blast hits to 395 proteins in 28 species: Archae - 0; Bacteria - 3; Metazoa - 0; Fungi - 0; Plants - 392; Viruses - 0; Other Eukaryotes - 0 (source: NCBI BLink).	RCAR1	regulatory component of ABA receptor 1	not assigned.unknown				419	452	737	338	336	669	244	219	251	415	402	413	298	314	254	581	531	19.0277	21.6892	28.7979	21.5221	21.4398	32.4119	13.1156	11.0412	15.2957	21.4372	24.0363	21.7791	21.0389	19.3414	15.3208	27.3788	28.5025	23.1716	25.1246	13.1508	22.4175	18.567	27.9407	5.05097
AT1G01370.1	Encodes a centromere-identifying protein histone H3 variant. Localized at centromeres in both mitotic and meiotic cells.	HTR12; FUNCTIONS IN: DNA binding; INVOLVED IN: double fertilization forming a zygote and endosperm; LOCATED IN: chromosome, centromeric region, nucleus; EXPRESSED IN: 17 plant structures; EXPRESSED DURING: 8 growth stages; CONTAINS InterPro DOMAIN/s: Histone H3 (InterPro:IPR000164), Histone-fold (InterPro:IPR009072), Histone core (InterPro:IPR007125); BEST Arabidopsis thaliana protein match is: m…	HTR12	Histone superfamily protein	DNA.synthesis/chromatin structure				0	9.51735	0	0	0	23.547	23.3634	0	0	18.4262	6.13622	8.53695	11.0421	0	25.2698	0	0	0	0.511728	0	0	0	1.27865	1.40637	0	0	1.06892	0.411389	0.504488	0.874035	0	1.70794	0	0	0.170576	0.426217	0.46879	0.661599	0.860658	0	0.295446
AT1G01370.2	Encodes a centromere-identifying protein histone H3 variant. Localized at centromeres in both mitotic and meiotic cells.	HTR12; FUNCTIONS IN: DNA binding; INVOLVED IN: double fertilization forming a zygote and endosperm; LOCATED IN: chromosome, centromeric region, nucleus; EXPRESSED IN: 17 plant structures; EXPRESSED DURING: 8 growth stages; CONTAINS InterPro DOMAIN/s: Histone H3 (InterPro:IPR000164), Histone-fold (InterPro:IPR009072), Histone core (InterPro:IPR007125); BEST Arabidopsis thaliana protein match is: m…	HTR12	Histone superfamily protein	DNA.synthesis/chromatin structure				89	73.4827	107	73	93	66.453	75.6366	78	47	119.574	85.8638	74.4631	37.9579	73	48.7302	104	69	4.71346	4.11449	4.87564	5.42177	6.9271	3.75825	4.74029	4.59046	3.34274	7.22979	5.99626	4.5826	3.12967	5.24553	3.42987	5.71664	4.32654	4.56786	5.36904	4.2245	5.93622	3.93502	5.02159	0.400919
AT1G01380.1	ETC1 is involved in trichome and root hair patterning in Arabidopsis.	ENHANCER OF TRY AND CPC 1 (ETC1); FUNCTIONS IN: DNA binding, sequence-specific DNA binding transcription factor activity; INVOLVED IN: regulation of transcription, DNA-dependent, regulation of transcription; EXPRESSED IN: shoot apex, hypocotyl, root; CONTAINS InterPro DOMAIN/s: SANT, DNA-binding (InterPro:IPR001005), Homeodomain-like (InterPro:IPR009057), Myb, DNA-binding (InterPro:IPR014778), Ho…	ETC1	Homeodomain-like superfamily protein	RNA.regulation of transcription.MYB-related transcription factor family				63	19	32	22	10	27	4	5	4	22	16	8	14	14	11	18	13	5.82426	1.86291	2.54497	2.85512	1.30683	2.67897	0.437116	0.516227	0.4986	2.36754	1.96614	0.862691	2.03099	1.75862	1.35583	1.72928	1.43568	3.41071	2.28031	0.483981	1.73212	1.71515	1.58248	2.11783
AT1G01390.1		UDP-Glycosyltransferase superfamily protein; FUNCTIONS IN: UDP-glycosyltransferase activity, transferase activity, transferring glycosyl groups; INVOLVED IN: metabolic process; EXPRESSED IN: 7 plant structures; EXPRESSED DURING: 9 growth stages; CONTAINS InterPro DOMAIN/s: UDP-glucuronosyl/UDP-glucosyltransferase (InterPro:IPR002213); BEST Arabidopsis thaliana protein match is: UDP-glucosyl trans…	AT1G01390	UDP-Glycosyltransferase superfamily protein	secondary metabolism.flavonoids.dihydroflavonols				174	227	283	312	268	574	71	107	67	241	273	233	103	90	78	282	386	4.36754	6.01138	6.11298	10.9759	9.42822	15.3316	2.1108	2.9742	2.25213	6.81385	8.98609	6.77863	4.00304	3.06172	2.59641	7.34095	11.4009	5.4973	11.9119	2.44571	7.52619	3.22039	9.37092	0.979719
AT1G01400.1		unknown protein; Has 21 Blast hits to 21 proteins in 8 species: Archae - 0; Bacteria - 2; Metazoa - 2; Fungi - 1; Plants - 13; Viruses - 0; Other Eukaryotes - 3 (source: NCBI BLink).	AT1G01400	hypothetical protein	not assigned.unknown				0	1	0	0	0	1	0	0	0	0	0	0	0	0	0	0	0	0	0.0409644	0	0	0	0.0413461	0	0	0	0	0	0	0	0	0	0	0	0.0136548	0.013782	0	0	0	0	0.0236508
AT1G01410.1	Encodes a member of the Arabidopsis Pumilio (APUM) proteins containing PUF domain (eight repeats of approximately 36 amino acids each). PUF proteins regulate both mRNA stability and translation through sequence-specific binding to the 3' UTR of target mRNA transcripts.	pumilio 22 (PUM22); FUNCTIONS IN: RNA binding, binding; INVOLVED IN: biological_process unknown; LOCATED IN: cellular_component unknown; CONTAINS InterPro DOMAIN/s: Pumilio RNA-binding repeat (InterPro:IPR001313), Armadillo-like helical (InterPro:IPR011989), Armadillo-type fold (InterPro:IPR016024); BEST Arabidopsis thaliana protein match is: ARM repeat superfamily protein (TAIR:AT5G64490.1); Has…	PUM22	pumilio 22	RNA.regulation of transcription.putative transcription regulator				0	0	0	0	0	0	0	0	0	0	0	0	0	0	0	0	0	0	0	0	0	0	0	0	0	0	0	0	0	0	0	0	0	0	0	0	0	0	0	0	0
AT1G01420.1		UDP-glucosyl transferase 72B3 (UGT72B3); FUNCTIONS IN: quercetin 3-O-glucosyltransferase activity, UDP-glycosyltransferase activity, transferase activity, transferring glycosyl groups; INVOLVED IN: metabolic process; LOCATED IN: cellular_component unknown; EXPRESSED IN: 11 plant structures; EXPRESSED DURING: LP.04 four leaves visible, petal differentiation and expansion stage; CONTAINS InterPro D…	UGT72B3	UDP-glucosyl transferase 72B3	secondary metabolism.flavonoids.dihydroflavonols				705	739	668	383	416	588	404	483	443	566	594	725	363	406	496	562	582	19.8548	21.9625	16.1891	15.1183	16.4264	17.6283	13.4746	15.0691	16.7127	17.9812	21.9506	23.672	15.8385	15.4985	18.529	16.4159	19.3	19.3355	16.391	15.0855	21.2013	16.622	17.8579	2.92153
AT1G01430.1	Encodes a member of the TBL (TRICHOME BIREFRINGENCE-LIKE) gene family containing a plant-specific DUF231 (domain of unknown function) domain. TBL gene family has 46 members, two of which (TBR/AT5G06700 and TBL3/AT5G01360) have been shown to be involved in the synthesis and deposition of secondary wall cellulose, presumably by influencing the esterification state of pectic polymers. A nomenclature…	TRICHOME BIREFRINGENCE-LIKE 25 (TBL25); CONTAINS InterPro DOMAIN/s: Protein of unknown function DUF231, plant (InterPro:IPR004253); BEST Arabidopsis thaliana protein match is: TRICHOME BIREFRINGENCE-LIKE 26 (TAIR:AT4G01080.1); Has 1353 Blast hits to 1335 proteins in 35 species: Archae - 0; Bacteria - 0; Metazoa - 0; Fungi - 6; Plants - 1340; Viruses - 0; Other Eukaryotes - 7 (source: NCBI BLink).	TBL25	TRICHOME BIREFRINGENCE-LIKE 25	not assigned.unknown				2036	1774	2118	1082	1081	1364	1114	1449	1343	1372	1215	1251	1258	1307	1449	1793	1322	52.6477	48.3995	47.1307	39.2134	39.181	37.5358	34.1175	41.4963	46.5096	39.9762	41.2063	37.4962	50.3748	45.8063	49.692	48.0846	40.2318	49.3926	38.6434	40.7078	39.5596	48.6244	44.1582	2.88947
AT1G01440.1		Protein of unknown function (DUF3133); CONTAINS InterPro DOMAIN/s: Protein of unknown function DUF3133 (InterPro:IPR021480); BEST Arabidopsis thaliana protein match is: Protein of unknown function (DUF3133) (TAIR:AT4G01090.1); Has 702 Blast hits to 662 proteins in 107 species: Archae - 0; Bacteria - 15; Metazoa - 235; Fungi - 59; Plants - 328; Viruses - 0; Other Eukaryotes - 65 (source: NCBI BLin…	AT1G01440	hypothetical protein (DUF3133)	signalling.G-proteins				426	456	409	381	372	541	266	226	248	565	470	468	208	283	263	593	498	7.93447	8.95613	6.55585	9.94417	9.70303	10.7137	5.8692	4.65761	6.1817	11.8167	11.4649	10.097	5.99065	7.14197	6.49288	11.4525	10.8989	7.81548	10.1203	5.5695	11.1262	6.54183	11.1757	1.20456
AT1G01448.1	Potential natural antisense gene, locus overlaps with AT1G01450		AT1G01448	Natural antisense transcript overlaps with AT1G01450	micro RNA, natural antisense etc				227.323	229.653	269.255	198.539	189.521	310.524	120.679	137.611	116.499	220.261	214.683	259.536	142.189	132.738	149.43	313.881	245.92	4.45346	4.74465	4.53955	5.45061	5.20018	6.46895	2.80067	2.98335	3.05469	4.84766	5.50932	5.89016	4.30829	3.52362	3.88059	6.37626	5.66217	4.57922	5.70658	2.94624	5.41571	3.90417	6.01921	0.149593
AT1G01448.2	Potential natural antisense gene, locus overlaps with AT1G01450		AT1G01448	Natural antisense transcript overlaps with AT1G01450	micro RNA, natural antisense etc				0	2.89519	0	1.68365	1.39848	2.81892	0	0	1.31243	0	0	0	1.43769	0	0	1.35461	2.55558	0	0.133558	0	0.103074	0.0857807	0.131284	0	0	0.0768853	0	0	0	0.0975584	0	0	0.0613729	0.131843	0.0445193	0.106713	0.0256284	0	0.0325195	0.0966079	0.0771097
AT1G01448.3	Potential natural antisense gene, locus overlaps with AT1G01450		AT1G01448	Natural antisense transcript overlaps with AT1G01450	micro RNA, natural antisense etc				12.3269	8.96904	13.6279	4.82125	6.17905	5.29785	8.07592	5.56836	3.30455	17.0215	14.7724	12.5192	10.106	8.48063	6.6475	15.869	7.90692	0.948637	0.731083	0.902199	0.520603	0.6708	0.436707	0.734913	0.477631	0.34235	1.51317	1.50624	1.12205	1.21662	0.88626	0.68115	1.26838	0.724294	0.86064	0.542703	0.518298	1.38049	0.92801	0.996337	0.114577
AT1G01450.1		Protein kinase superfamily protein; FUNCTIONS IN: protein serine/threonine/tyrosine kinase activity, kinase activity; INVOLVED IN: protein amino acid phosphorylation; LOCATED IN: cellular_component unknown; EXPRESSED IN: pollen tube; CONTAINS InterPro DOMAIN/s: Protein kinase, catalytic domain (InterPro:IPR000719), Serine/threonine-protein kinase domain (InterPro:IPR002290), Tyrosine-protein kina…	AT1G01450	Protein kinase superfamily protein	protein.postranslational modification				6.34997	7.48323	9.11674	6.95567	7.90195	2.35959	2.24473	8.82101	8.88364	12.7171	5.5447	3.94521	10.2677	7.78135	3.92235	12.8956	11.6179	0.193996	0.241296	0.239675	0.297859	0.338576	0.0767617	0.0812103	0.298629	0.363649	0.438768	0.222376	0.139768	0.48622	0.322259	0.158979	0.408642	0.418152	0.224989	0.237732	0.247829	0.266971	0.322486	0.413397	0.026853
AT1G01453.1		unknown protein; FUNCTIONS IN: molecular_function unknown; INVOLVED IN: biological_process unknown; LOCATED IN: cellular_component unknown; BEST Arabidopsis thaliana protein match is: unknown protein (TAIR:AT4G01110.1); Has 30201 Blast hits to 17322 proteins in 780 species: Archae - 12; Bacteria - 1396; Metazoa - 17338; Fungi - 3422; Plants - 5037; Viruses - 0; Other Eukaryotes - 2996 (source: NC…	AT1G01453	late embryogenesis abundant hydroxyproline-rich glycoprotein family protein	not assigned.unknown				10	6	0	2	2	3	0	4	1	5	5	0	0	1	8	1	7	0.401196	0.254252	0	0.112494	0.11267	0.128319	0	0.178045	0.0538081	0.227593	0.263839	0	0	0.0544066	0.426132	0.0416252	0.331559	0.218483	0.117828	0.0772844	0.163811	0.16018	0.186592	0.202976
AT1G01453.2		unknown protein; FUNCTIONS IN: molecular_function unknown; INVOLVED IN: biological_process unknown; LOCATED IN: cellular_component unknown; BEST Arabidopsis thaliana protein match is: unknown protein (TAIR:AT4G01110.1); Has 30201 Blast hits to 17322 proteins in 780 species: Archae - 12; Bacteria - 1396; Metazoa - 17338; Fungi - 3422; Plants - 5037; Viruses - 0; Other Eukaryotes - 2996 (source: NC…	AT1G01453	late embryogenesis abundant hydroxyproline-rich glycoprotein family protein	not assigned.unknown				0	0	0	0	0	0	0	0	0	0	0	5	0	0	0	0	0	0	0	0	0	0	0	0	0	0	0	0	0.208247	0	0	0	0	0	0	0	0	0.0694157	0	0	0
AT1G01460.1	Type I phosphatidylinositol-4-phosphate 5-kinase, subfamily A.	PIPK11; FUNCTIONS IN: 1-phosphatidylinositol-4-phosphate 5-kinase activity, phosphatidylinositol phosphate kinase activity; INVOLVED IN: phosphatidylinositol metabolic process; LOCATED IN: cellular_component unknown; EXPRESSED IN: sperm cell, sepal, male gametophyte, flower, pollen tube; EXPRESSED DURING: L mature pollen stage, M germinated pollen stage, 4 anthesis; CONTAINS InterPro DOMAIN/s: Ph…	PIPK11	Phosphatidylinositol-4-phosphate 5-kinase, core	signalling.phosphinositides.phosphatidylinositol-4-phosphate 5-kinase				0	0	0	0	0	0	0	0	0	1	0	0	0	0	0	0	1	0	0	0	0	0	0	0	0	0	0.0334532	0	0	0	0	0	0	0.0349061	0	0	0	0.0111511	0	0.0174531	0
AT1G01470.1	Encodes late-embryogenesis abundant protein whose mRNA levels are induced in response to wounding and light stress. Might be involved in protection against dessication.	LATE EMBRYOGENESIS ABUNDANT 14 (LEA14); CONTAINS InterPro DOMAIN/s: Water stress and hypersensitive response domain (InterPro:IPR013990), Late embryogenesis abundant protein, group 2 (InterPro:IPR004864); BEST Arabidopsis thaliana protein match is: Late embryogenesis abundant protein (TAIR:AT2G46140.1); Has 340 Blast hits to 340 proteins in 93 species: Archae - 0; Bacteria - 10; Metazoa - 0; Fung…	LEA14	Late embryogenesis abundant protein	development.late embryogenesis abundant				3026	1883	2772	1872	1652	3118	2299	2482	1836	3407	3324	3328	1146	1887	2623	2472	2494	202.548	133.399	159.629	175.78	155.794	223.269	182.026	184.942	165.273	262.142	294.205	259.196	119.757	171.471	233.593	171.806	198.266	165.192	184.948	177.414	271.848	174.94	185.036	34.9085
AT1G01471.1		unknown protein; Has 30201 Blast hits to 17322 proteins in 780 species: Archae - 12; Bacteria - 1396; Metazoa - 17338; Fungi - 3422; Plants - 5037; Viruses - 0; Other Eukaryotes - 2996 (source: NCBI BLink).			not assigned.unknown				0	0	0	0	0	0	0	0	0	0	1	0	0	0	0	0	0	0	0	0	0	0	0	0	0	0	0	0.723049	0	0	0	0	0	0	0	0	0	0.241016	0	0	0
AT1G01480.1	a member of the 1-aminocyclopropane-1-carboxylate (ACC) synthase (S-adenosyl-L-methionine methylthioadenosine-lyase, EC 4.4.1.14) gene family, isolated from a flower-specific cDNA library.	1-amino-cyclopropane-1-carboxylate synthase 2 (ACS2); CONTAINS InterPro DOMAIN/s: 1-aminocyclopropane-1-carboxylate synthase (InterPro:IPR001176), Aminotransferase, class I/classII (InterPro:IPR004839), Pyridoxal phosphate-dependent transferase, major domain (InterPro:IPR015424), Aminotransferases, class-I, pyridoxal-phosphate-binding site (InterPro:IPR004838), Pyridoxal phosphate-dependent trans…	ACS2	1-amino-cyclopropane-1-carboxylate synthase 2	hormone metabolism.ethylene.synthesis-degradation.1-aminocyclopropane-1-carboxylate synthase				78.6151	54	8.99982	9.55553	0	19.0717	76.5491	31	25	52.4161	114	28.6286	7	20	85.9141	8.99975	38.0656	1.7134	1.24136	0.1688	0.291858	0	0.442127	1.97623	0.747879	0.72942	1.28474	3.25606	0.722963	0.236062	0.590689	2.48254	0.203402	0.975508	1.04119	0.244662	1.15118	1.75459	1.1031	0.589455	0.791517
AT1G01480.2	a member of the 1-aminocyclopropane-1-carboxylate (ACC) synthase (S-adenosyl-L-methionine methylthioadenosine-lyase, EC 4.4.1.14) gene family, isolated from a flower-specific cDNA library.	1-amino-cyclopropane-1-carboxylate synthase 2 (ACS2); CONTAINS InterPro DOMAIN/s: 1-aminocyclopropane-1-carboxylate synthase (InterPro:IPR001176), Pyridoxal phosphate-dependent transferase, major domain (InterPro:IPR015424), Aminotransferase, class I/classII (InterPro:IPR004839), Aminotransferases, class-I, pyridoxal-phosphate-binding site (InterPro:IPR004838), Pyridoxal phosphate-dependent trans…	ACS2	1-amino-cyclopropane-1-carboxylate synthase 2	hormone metabolism.ethylene.synthesis-degradation.1-aminocyclopropane-1-carboxylate synthase				10.3849	0	0.000184851	0.444473	9	5.9283	10.4509	0	1.28154e-07	8.5839	0	3.37143	0	0	24.0859	0.000253634	9.93441	0.252769	0	3.87191e-06	0.0151621	0.306996	0.153532	0.301293	0	4.17689e-09	0.235254	0	0.0951056	0	0	0.777414	6.40231e-06	0.284484	0.0842576	0.158563	0.100431	0.11012	0.259138	0.142245	0.145935
AT1G01490.1		Heavy metal transport/detoxification superfamily protein ; FUNCTIONS IN: metal ion binding; INVOLVED IN: metal ion transport; LOCATED IN: cellular_component unknown; EXPRESSED IN: 22 plant structures; EXPRESSED DURING: 14 growth stages; CONTAINS InterPro DOMAIN/s: Heavy metal transport/detoxification protein (InterPro:IPR006121); BEST Arabidopsis thaliana protein match is: Heavy metal transport/d…	AT1G01490	Heavy metal transport/detoxification superfamily protein	DNA.repair				1452.32	1309.97	1092.37	778.992	897.505	1152.99	878.261	873.821	823.731	1858.7	1424.8	1426.22	859.648	950.351	1015.28	1439.99	1457.88	58.5712	55.8019	37.9077	44.0455	50.8267	49.5761	41.9315	39.0994	44.5562	85.0567	75.5798	66.7605	53.8435	51.9762	54.3641	60.2538	69.4175	50.7603	48.1494	41.8624	75.799	53.3946	64.8357	11.2164
AT1G01490.2		Heavy metal transport/detoxification superfamily protein ; FUNCTIONS IN: metal ion binding; INVOLVED IN: metal ion transport; LOCATED IN: cellular_component unknown; EXPRESSED IN: 22 plant structures; EXPRESSED DURING: 14 growth stages; CONTAINS InterPro DOMAIN/s: Heavy metal transport/detoxification protein (InterPro:IPR006121); BEST Arabidopsis thaliana protein match is: Heavy metal transport/d…	AT1G01490	Heavy metal transport/detoxification superfamily protein	DNA.repair				617.68	950.025	802.628	417.008	276.495	414.012	460.739	608.179	511.269	329.3	550.204	945.783	295.352	544.649	490.72	997.009	458.123	28.5205	46.3539	31.8879	26.9986	17.9404	20.3964	25.1805	31.1794	31.6811	17.3019	33.4543	50.7146	21.2048	34.1122	30.0974	47.7713	25.0071	35.5874	21.7785	29.347	33.8236	28.4715	36.3892	9.47483
AT1G01500.1		Erythronate-4-phosphate dehydrogenase family protein; BEST Arabidopsis thaliana protein match is: Erythronate-4-phosphate dehydrogenase family protein (TAIR:AT1G19400.2); Has 143 Blast hits to 143 proteins in 19 species: Archae - 0; Bacteria - 0; Metazoa - 0; Fungi - 0; Plants - 143; Viruses - 0; Other Eukaryotes - 0 (source: NCBI BLink).	AT1G01500	Erythronate-4-phosphate dehydrogenase family protein	not assigned.unknown				227	234	217	129	137	192	155	177	174	197	174	233	102	150	160	156	137	6.68089	7.26821	5.49584	5.32155	5.65419	6.01638	5.40234	5.77184	6.86087	6.54435	6.72125	7.95127	4.65211	5.98424	6.24691	4.76213	4.74906	6.48165	5.66404	6.01168	7.07229	5.62775	4.75559	0.902827
AT1G01510.1	Encodes a homolog of human CtBP. Mutant has longer and thicker leaves than wild type. Involved in controlling polar cell expansion in the leaf width direction.	ANGUSTIFOLIA (AN); CONTAINS InterPro DOMAIN/s: D-isomer specific 2-hydroxyacid dehydrogenase, NAD-binding (InterPro:IPR006140), NAD(P)-binding domain (InterPro:IPR016040); BEST Arabidopsis thaliana protein match is: D-isomer specific 2-hydroxyacid dehydrogenase family protein (TAIR:AT1G12550.1); Has 20556 Blast hits to 20427 proteins in 2617 species: Archae - 372; Bacteria - 13694; Metazoa - 624;…	AN	NAD(P)-binding Rossmann-fold superfamily protein	RNA.regulation of transcription.Orphan family				1094	979	1106	973	925	1203	725	631	617	1117	883	997	589	642	654	1145	1012	21.0474	19.8624	18.3118	26.2322	24.9237	24.6101	16.5234	13.4335	15.887	24.138	22.2515	22.2197	17.5248	16.7359	16.6783	22.8418	22.8804	19.7405	25.2553	15.2813	22.8697	16.9797	22.8611	1.37187
AT1G01520.1		Homeodomain-like superfamily protein; CONTAINS InterPro DOMAIN/s: SANT, DNA-binding (InterPro:IPR001005), Homeodomain-like (InterPro:IPR009057), Myb, DNA-binding (InterPro:IPR014778), Myb-like DNA-binding domain, SHAQKYF class (InterPro:IPR006447), HTH transcriptional regulator, Myb-type, DNA-binding (InterPro:IPR017930); BEST Arabidopsis thaliana protein match is: Homeodomain-like superfamily pr…	ASG4	Homeodomain-like superfamily protein	RNA.regulation of transcription.MYB-related transcription factor family				2746	1872	2680	183	170	286	1146	1096	1543	309	317	472	1335	1461	1653	299	376	148.488	107.032	124.687	13.8779	12.9306	16.5173	73.3305	65.8681	112.063	19.0865	22.6083	29.6619	112.413	107.196	118.804	16.7816	24.0785	126.736	14.4419	83.7539	23.7856	112.804	20.4301	20.8038
AT1G01530.1		AGAMOUS-like 28 (AGL28); FUNCTIONS IN: DNA binding, sequence-specific DNA binding transcription factor activity; INVOLVED IN: regulation of transcription, DNA-dependent; LOCATED IN: nucleus; EXPRESSED IN: central cell, embryo, endosperm; CONTAINS InterPro DOMAIN/s: Transcription factor, MADS-box (InterPro:IPR002100); BEST Arabidopsis thaliana protein match is: AGAMOUS-like 23 (TAIR:AT1G65360.1); …	AGL28	AGAMOUS-like 28	RNA.regulation of transcription.MADS box transcription factor family				6	7	6	7	6	10	8	4	4	8	14	10	5	3	3	15	12	0.384909	0.475179	0.33115	0.629917	0.542109	0.686034	0.607113	0.285555	0.344997	0.589129	1.18693	0.746243	0.500487	0.26124	0.255998	0.999066	0.913716	0.397079	0.619353	0.412555	0.840767	0.339242	0.956391	0.0727817
AT1G01540.1		Protein kinase superfamily protein; FUNCTIONS IN: protein serine/threonine kinase activity, protein kinase activity, kinase activity, ATP binding; INVOLVED IN: protein amino acid phosphorylation; LOCATED IN: plasma membrane; EXPRESSED IN: 23 plant structures; EXPRESSED DURING: 13 growth stages; CONTAINS InterPro DOMAIN/s: Protein kinase, ATP binding site (InterPro:IPR017441), Serine/threonine-pro…	AT1G01540	Protein kinase superfamily protein	protein.postranslational modification.kinase.receptor like cytoplasmatic kinase V				265.178	66.242	151.81	189.136	149.374	209.085	113.959	105.912	142.751	173.295	125.601	210.681	115.065	97.0722	91.8058	274.361	124.043	5.81895	1.53319	2.86678	5.81631	4.59217	4.88028	2.9621	2.57265	4.19354	4.27683	3.61201	5.35678	3.90699	2.88657	2.67093	6.24318	3.20067	3.40631	5.09625	3.24276	4.41521	3.15483	4.72192	2.19323
AT1G01540.2		Protein kinase superfamily protein; FUNCTIONS IN: protein serine/threonine kinase activity, protein kinase activity, kinase activity, ATP binding; INVOLVED IN: protein amino acid phosphorylation; LOCATED IN: plasma membrane; EXPRESSED IN: 23 plant structures; EXPRESSED DURING: 13 growth stages; CONTAINS InterPro DOMAIN/s: Protein kinase, ATP binding site (InterPro:IPR017441), Serine/threonine-pro…	AT1G01540	Protein kinase superfamily protein	protein.postranslational modification.kinase.receptor like cytoplasmatic kinase V				2524.82	2129.76	2821.19	2102.86	2177.63	2661.91	1501.04	1634.09	1646.25	3013.71	2633.4	2601.32	1587.93	1713.93	1534.19	3775.64	2659.96	55.0278	48.959	52.9141	64.2286	66.4909	61.7094	38.7516	39.4226	48.0323	73.867	75.2149	65.6916	53.5502	50.6199	44.3314	85.3328	68.1668	52.3003	64.143	42.0688	71.5912	49.5005	76.7498	3.08061
AT1G01550.1	Encodes a protein with no functionally characterized domains that to prevent the synthesis of a novel substance that moves from the root to the shoot, where it modifies shoot growth by interfering with auxin signaling. Synthesis and delivery of this substance requires neither phloem nor endodermis.	BYPASS 1 (BPS1); FUNCTIONS IN: molecular_function unknown; LOCATED IN: plasma membrane; EXPRESSED IN: 24 plant structures; EXPRESSED DURING: 13 growth stages; CONTAINS InterPro DOMAIN/s: Protein BYPASS related (InterPro:IPR008511); BEST Arabidopsis thaliana protein match is: unknown protein (TAIR:AT2G46080.1); Has 170 Blast hits to 170 proteins in 24 species: Archae - 0; Bacteria - 0; Metazoa - 7…	BPS1	BPS1-like protein (DUF793)	development.unspecified				3136.37	2869.14	3069.93	1884.19	2082.84	2904.28	2109.2	1926.59	1793.06	2934.83	2559.96	2724.64	1722.33	1978.73	2032.15	2894.28	2683.92	92.3776	89.186	77.8098	77.7865	86.0278	91.0764	73.5696	62.8729	70.755	97.5707	98.9617	93.0512	78.6137	79.0017	79.4025	88.4196	93.1087	86.4578	84.9636	69.0658	96.5279	79.006	90.7642	7.65751
AT1G01550.2	Encodes a protein with no functionally characterized domains that to prevent the synthesis of a novel substance that moves from the root to the shoot, where it modifies shoot growth by interfering with auxin signaling. Synthesis and delivery of this substance requires neither phloem nor endodermis.	BYPASS 1 (BPS1); FUNCTIONS IN: molecular_function unknown; LOCATED IN: plasma membrane; EXPRESSED IN: 24 plant structures; EXPRESSED DURING: 13 growth stages; CONTAINS InterPro DOMAIN/s: Protein BYPASS related (InterPro:IPR008511); BEST Arabidopsis thaliana protein match is: unknown protein (TAIR:AT2G46080.1); Has 35333 Blast hits to 34131 proteins in 2444 species: Archae - 798; Bacteria - 22429;…	BPS1	BPS1-like protein (DUF793)	development.unspecified				1011.63	1778.86	1339.07	663.812	593.159	1027.72	941.804	1337.41	1192.94	1368.17	1196.04	1045.36	866.675	1309.27	1221.85	1256.72	953.085	30.4002	56.418	34.6274	27.9604	24.9977	32.8841	33.5156	44.5332	48.0309	46.4212	47.1785	36.4266	40.3649	53.3339	48.7111	39.1713	33.7383	40.4819	28.6141	42.0266	43.3421	47.47	36.4548	13.962
AT1G01560.1	member of MAP Kinase	MAP kinase 11 (MPK11); FUNCTIONS IN: MAP kinase activity, kinase activity; INVOLVED IN: signal transduction, response to abscisic acid stimulus; LOCATED IN: cellular_component unknown; EXPRESSED IN: 22 plant structures; EXPRESSED DURING: 13 growth stages; CONTAINS InterPro DOMAIN/s: Protein kinase, ATP binding site (InterPro:IPR017441), Serine/threonine-protein kinase domain (InterPro:IPR002290),…	MPK11	MAP kinase 11	signalling.MAP kinases				24.3071	54.4785	2.04668	17.8477	16.753	38.6029	44.1752	24.4809	20.7567	66.0894	39.1771	27.4883	5.14035	35.3491	22.7938	19.9107	19.8684	0.601128	1.42137	0.0435575	0.618599	0.580648	1.01583	1.29395	0.670405	0.687396	1.84067	1.27044	0.787888	0.196815	1.18479	0.74753	0.510659	0.578129	0.688685	0.738359	0.883917	1.29967	0.709712	0.544394	0.693067
AT1G01560.2	member of MAP Kinase	MAP kinase 11 (MPK11); FUNCTIONS IN: MAP kinase activity, kinase activity; INVOLVED IN: signal transduction, response to abscisic acid stimulus; LOCATED IN: cellular_component unknown; EXPRESSED IN: 22 plant structures; EXPRESSED DURING: 13 growth stages; CONTAINS InterPro DOMAIN/s: Protein kinase, ATP binding site (InterPro:IPR017441), Serine/threonine-protein kinase domain (InterPro:IPR002290),…	MPK11	MAP kinase 11	signalling.MAP kinases				133.693	187.522	40.9533	88.1523	66.247	272.397	190.825	120.519	120.243	397.911	222.823	133.512	42.8597	159.651	144.206	143.089	116.132	4.41311	6.53446	1.16327	4.07892	3.06788	9.57771	7.45874	4.40981	5.31957	14.8513	9.66044	5.11179	2.19401	7.14463	6.31653	4.89955	4.51866	4.03695	5.57484	5.72937	9.87451	5.21839	4.70911	2.70528
AT1G01570.1		FUNCTIONS IN: transferase activity, transferring glycosyl groups; INVOLVED IN: biological_process unknown; LOCATED IN: endomembrane system; EXPRESSED IN: 15 plant structures; EXPRESSED DURING: 7 growth stages; CONTAINS InterPro DOMAIN/s: Protein of unknown function DUF604 (InterPro:IPR006740); BEST Arabidopsis thaliana protein match is: fringe-related protein (TAIR:AT4G00300.1); Has 558 Blast hit…	AT1G01570	transferring glycosyl group transferase (DUF604)	not assigned.no ontology				39	32	31	17	26	39	21	29	36	28	29	27	27	20	21	35	17	1.16924	1.01254	0.799769	0.714386	1.09316	1.24497	0.745577	0.963383	1.44606	0.947772	1.14124	0.938636	1.25456	0.812808	0.835244	1.08838	0.600371	0.99385	1.01751	1.05167	1.00922	0.967537	0.844375	0.185443
AT1G01580.1	Encodes the low-iron-inducible ferric chelate reductase responsible for reduction of iron at the root surface. It is likely to be the major Fe(III) chelate reductase in Arabidopsis iron metabolism. Coordinately regulated with IRT1, the major transporter responsible for high-affinity iron uptake from the soil, at both transcriptional and posttranscriptional levels. Steady state mRNA levels are reg…	ferric reduction oxidase 2 (FRO2); CONTAINS InterPro DOMAIN/s: Ferredoxin reductase-type FAD-binding domain (InterPro:IPR017927), Ferric reductase, NAD binding (InterPro:IPR013121), FAD-binding 8 (InterPro:IPR013112), Riboflavin synthase-like beta-barrel (InterPro:IPR017938), Ferric reductase-like transmembrane component, N-terminal (InterPro:IPR013130); BEST Arabidopsis thaliana protein match is…	FRO2	ferric reduction oxidase 2	metal handling.acquisition				101	54	131	44	36	82	21	18	9	10	31	26	58	30	22	36	48	1.72455	0.972175	1.92499	1.05275	0.860655	1.48839	0.424799	0.340008	0.205625	0.191589	0.693023	0.514166	1.53091	0.69402	0.49785	0.637343	0.962701	1.54057	1.13393	0.323477	0.466259	0.907593	0.800022	0.502345
AT1G01590.1	Encodes a ferric-chelate reductase that is expressed at extremely low levels in Fe deficiency-induced seedlings.	ferric reduction oxidase 1 (FRO1); FUNCTIONS IN: ferric-chelate reductase activity; INVOLVED IN: oxidation reduction; LOCATED IN: integral to membrane, membrane; CONTAINS InterPro DOMAIN/s: Ferredoxin reductase-type FAD-binding domain (InterPro:IPR017927), Ferric reductase, NAD binding (InterPro:IPR013121), FAD-binding 8 (InterPro:IPR013112), Riboflavin synthase-like beta-barrel (InterPro:IPR0179…	FRO1	ferric reduction oxidase 1	metal handling.acquisition				57	36	58	40	55	41	20	10	22	34	38	41	14	13	14	60	66	1.11895	0.745281	0.97985	1.10038	1.5122	0.855872	0.465096	0.217239	0.578032	0.749833	0.977173	0.932394	0.425065	0.345797	0.364311	1.22134	1.52272	0.948027	1.15615	0.420122	0.886467	0.378391	1.37203	0.188856
AT1G01600.1	Encodes a member of the CYP86A subfamily of cytochrome p450 genes. Expressed significantly at highest level in mature stems and flowers.	\cytochrome P450, family 86, subfamily A, polypeptide 4\" (CYP86A4); CONTAINS InterPro DOMAIN/s: Cytochrome P450 (InterPro:IPR001128), Cytochrome P450, conserved site (InterPro:IPR017972), Cytochrome P450, E-class, group I (InterPro:IPR002401); BEST Arabidopsis thaliana protein match is: cytochrome P450, family 86, subfamily A, polypeptide 2 (TAIR:AT4G00360.1); Has 27858 Blast hits to 27767 prote…	CYP86A4	cytochrome P450, family 86, subfamily A, polypeptide 4	misc.cytochrome P450				627	224	297	382	214	441	78	71	57	242	186.052	236	141	89	146	260	313	12.0149	4.52651	4.89782	10.2578	5.74314	8.98568	1.77063	1.50551	1.46183	5.20855	4.66977	5.23868	4.17849	2.31086	3.70847	5.16614	7.0484	7.14641	8.32887	1.57932	5.039	3.39927	6.10727	4.22032
AT1G01610.1	bifunctional sn-glycerol-3-phosphate 2-O-acyltransferase/phosphatase. Involved in cutin assembly and is functionally redundant with GPAT8.	glycerol-3-phosphate acyltransferase 4 (GPAT4); FUNCTIONS IN: 1-acylglycerol-3-phosphate O-acyltransferase activity, acyltransferase activity; INVOLVED IN: metabolic process, cutin biosynthetic process; EXPRESSED IN: 25 plant structures; EXPRESSED DURING: 14 growth stages; CONTAINS InterPro DOMAIN/s: Phospholipid/glycerol acyltransferase (InterPro:IPR002123); BEST Arabidopsis thaliana protein mat…	GPAT4	glycerol-3-phosphate acyltransferase 4	lipid metabolism.Phospholipid synthesis				1910	1928	2045	1422	1200	1672	902	1031	987	1350	1214	1140	1202	1107	1257	1497	1603	43.1905	45.9875	39.7955	45.0638	38.0196	40.22	24.1599	25.8093	29.8809	34.3445	35.9815	29.8715	42.0637	33.923	37.6875	35.1043	42.6299	42.9912	41.1011	26.6167	33.3992	37.8914	38.8671	3.10081
AT1G01620.1	a member of the plasma membrane intrinsic protein subfamily PIP1. localizes to the plasma membrane and exhibits water transport activity in Xenopus oocyte. expressed ubiquitously and protein level decreases slightly during leaf development.	plasma membrane intrinsic protein 1C (PIP1C); FUNCTIONS IN: water channel activity; INVOLVED IN: response to water deprivation, response to salt stress, transport, water transport; LOCATED IN: plasma membrane, chloroplast, membrane; EXPRESSED IN: 22 plant structures; EXPRESSED DURING: 14 growth stages; CONTAINS InterPro DOMAIN/s: Major intrinsic protein, conserved site (InterPro:IPR022357), Aquap…	PIP1C	plasma membrane intrinsic protein 1C	transport.Major Intrinsic Proteins.PIP				9779	4993	9197	4817	4665.52	4867	3827.14	3634	2931	4529.61	3840	3410	6299	4435.86	4519	6274	4905	325.867	175.647	263.723	225.01	218.122	172.762	151.012	134.238	130.905	170.692	168.076	131.804	325.535	200.401	199.828	216.874	192.681	255.079	205.298	138.718	156.857	241.921	204.778	75.4821
AT1G01620.2	a member of the plasma membrane intrinsic protein subfamily PIP1. localizes to the plasma membrane and exhibits water transport activity in Xenopus oocyte. expressed ubiquitously and protein level decreases slightly during leaf development.	plasma membrane intrinsic protein 1C (PIP1C); FUNCTIONS IN: water channel activity; INVOLVED IN: response to water deprivation, response to salt stress, transport, water transport; LOCATED IN: plasma membrane, membrane; EXPRESSED IN: 22 plant structures; EXPRESSED DURING: 14 growth stages; CONTAINS InterPro DOMAIN/s: Major intrinsic protein, conserved site (InterPro:IPR022357), Aquaporin (InterPr…	PIP1C	plasma membrane intrinsic protein 1C	transport.Major Intrinsic Proteins.PIP				0	0	0	0	8.47621	0	8.85934	0	0	6.39153	0	0	0	18.1448	0	0	0	0	0	0	0	0.40651	0	0.35855	0	0	0.247151	0	0	0	0.840843	0	0	0	0	0.135503	0.119517	0.0823837	0.280281	0	0
AT1G01630.1		Sec14p-like phosphatidylinositol transfer family protein; CONTAINS InterPro DOMAIN/s: Cellular retinaldehyde-binding/triple function, C-terminal (InterPro:IPR001251), Cellular retinaldehyde-binding/triple function, N-terminal (InterPro:IPR008273), Phosphatidylinositol transfer protein-like, N-terminal (InterPro:IPR011074); BEST Arabidopsis thaliana protein match is: Sec14p-like phosphatidylinosit…	AT1G01630	Sec14p-like phosphatidylinositol transfer family protein	protein.targeting.secretory pathway.unspecified				1637	1610	1691	1133	1122	1421	1128	1233	1015	1620	1248	1471	832	1260	1105	1624	1437	59.9947	62.3063	53.3277	58.2109	57.7152	55.4985	48.9461	50.1132	49.8734	67.2486	60.1163	62.5519	47.3213	62.6137	53.7535	61.7458	62.1288	58.5429	57.1415	49.6442	63.3056	54.5628	61.9373	4.66204
AT1G01640.1	Putative role in flower development. Comparison of SALK_011721C to Columbia wild type resulted in a trend toward earlier flowering in the mutant (P=0.1) (Stapleton and Woodruff 2009, personal communication).	BTB/POZ domain-containing protein; CONTAINS InterPro DOMAIN/s: BTB/POZ (InterPro:IPR013069), BTB/POZ fold (InterPro:IPR011333), Kelch related (InterPro:IPR013089), BTB/POZ-like (InterPro:IPR000210); BEST Arabidopsis thaliana protein match is: BTB/POZ domain-containing protein (TAIR:AT3G56230.1); Has 4339 Blast hits to 4265 proteins in 145 species: Archae - 0; Bacteria - 0; Metazoa - 3351; Fungi -…	AT1G01640	BTB/POZ domain-containing protein	protein.degradation.ubiquitin.E3.BTB/POZ Cullin3.BTB/POZ				95	52.6148	83	72	61	79	74	66	45	149	114	108	33.734	81	50	104	89	4.77539	2.79567	3.5898	5.07529	4.3111	4.23921	4.40228	3.68549	3.03693	8.5397	7.55228	6.30698	2.63856	5.52384	3.3396	5.42555	5.29368	3.72029	4.54187	3.70823	7.46632	3.834	5.35961	0.99629
AT1G01640.2	Putative role in flower development. Comparison of SALK_011721C to Columbia wild type resulted in a trend toward earlier flowering in the mutant (P=0.1) (Stapleton and Woodruff 2009, personal communication).	BTB/POZ domain-containing protein; CONTAINS InterPro DOMAIN/s: BTB/POZ (InterPro:IPR013069), BTB/POZ fold (InterPro:IPR011333), Kelch related (InterPro:IPR013089), BTB/POZ-like (InterPro:IPR000210); BEST Arabidopsis thaliana protein match is: BTB/POZ domain-containing protein (TAIR:AT3G56230.1); Has 4339 Blast hits to 4265 proteins in 145 species: Archae - 0; Bacteria - 0; Metazoa - 3351; Fungi -…	AT1G01640	BTB/POZ domain-containing protein	protein.degradation.ubiquitin.E3.BTB/POZ Cullin3.BTB/POZ				0	19.3852	0	0	0	0	0	8.26376e-07	0	0	0	0	22.266	0	0	0	0	0	1.07947	0	0	0	0	0	4.83664e-08	0	0	0	0	1.82571	0	0	0	0	0.359823	0	1.61221e-08	0	0.60857	0	0.623232
AT1G01650.1		SIGNAL PEPTIDE PEPTIDASE-LIKE 4 (SPPL4); FUNCTIONS IN: peptidase activity, aspartic-type endopeptidase activity; INVOLVED IN: proteolysis; LOCATED IN: endomembrane system, integral to membrane; EXPRESSED IN: 24 plant structures; EXPRESSED DURING: 13 growth stages; CONTAINS InterPro DOMAIN/s: Protease-associated PA (InterPro:IPR003137), Peptidase A22, presenilin signal peptide (InterPro:IPR006639)…	SPPL4	SIGNAL PEPTIDE PEPTIDASE-LIKE 4	protein.degradation				946.517	1088.95	952.767	826.752	738.488	1491.85	811.1	678.318	583.867	1333.86	1029.32	1194.98	450.36	746.256	777.164	1050.23	942.964	18.3473	22.2599	15.8937	22.4575	20.0486	30.7499	18.625	14.5501	15.1474	29.0436	26.1352	26.8333	13.5012	19.6005	19.969	21.1093	21.4811	18.8336	24.4187	16.1075	27.3374	17.6902	21.2952	3.21084
AT1G01650.2		SIGNAL PEPTIDE PEPTIDASE-LIKE 4 (SPPL4); FUNCTIONS IN: peptidase activity, aspartic-type endopeptidase activity; INVOLVED IN: proteolysis; LOCATED IN: integral to membrane; EXPRESSED IN: 24 plant structures; EXPRESSED DURING: 13 growth stages; CONTAINS InterPro DOMAIN/s: Peptidase A22, presenilin signal peptide (InterPro:IPR006639), Peptidase A22B, signal peptide peptidase (InterPro:IPR007369); B…	SPPL4	SIGNAL PEPTIDE PEPTIDASE-LIKE 4	protein.degradation				19.4832	44.0511	23.2331	54.2479	39.5122	22.1475	23.8997	39.6822	31.1327	30.1418	68.6762	73.018	46.6396	47.7437	11.8361	34.7689	33.0361	0.363061	0.86561	0.372582	1.41656	1.03111	0.43881	0.527593	0.818203	0.776395	0.630707	1.67606	1.57611	1.34393	1.20547	0.292348	0.671808	0.723355	0.533751	0.96216	0.707397	1.29429	0.947249	0.697581	0.287438
AT1G01660.1		RING/U-box superfamily protein; FUNCTIONS IN: ubiquitin-protein ligase activity; INVOLVED IN: protein ubiquitination; LOCATED IN: ubiquitin ligase complex; CONTAINS InterPro DOMAIN/s: U box domain (InterPro:IPR003613); BEST Arabidopsis thaliana protein match is: U-box domain-containing protein kinase family protein (TAIR:AT2G45910.1); Has 73160 Blast hits to 42540 proteins in 2253 species: Archae…	AT1G01660	RING/U-box superfamily protein	protein.degradation.ubiquitin.E3.RING				52	41	51	24	21	49	38	29	34	55	33	54	27	39	40	51	22	1.28847	1.07177	1.08747	0.833442	0.729253	1.29192	1.11521	0.795697	1.12815	1.5348	1.0722	1.55077	1.03579	1.30968	1.31435	1.31054	0.641395	1.14924	0.951538	1.01302	1.38592	1.21994	0.975967	0.120835
AT1G01670.1		RING/U-box superfamily protein; FUNCTIONS IN: ubiquitin-protein ligase activity; INVOLVED IN: protein ubiquitination; LOCATED IN: ubiquitin ligase complex; EXPRESSED IN: 12 plant structures; EXPRESSED DURING: 7 growth stages; CONTAINS InterPro DOMAIN/s: U box domain (InterPro:IPR003613); BEST Arabidopsis thaliana protein match is: RING/U-box superfamily protein (TAIR:AT3G61390.2); Has 3857 Blast …	AT1G01670	RING/U-box superfamily protein	protein.degradation.ubiquitin.E3.RING				107	61	78	55	53	82	63	67	77	69	64	81	48	78	65	105	39	3.27411	1.97007	2.05384	2.35897	2.27452	2.67185	2.28284	2.27185	3.15699	2.38449	2.57088	2.87418	2.27663	3.23544	2.63875	3.33258	1.40593	2.43267	2.43511	2.57056	2.60985	2.71694	2.36925	0.729908
AT1G01680.1		plant U-box 54 (PUB54); FUNCTIONS IN: ubiquitin-protein ligase activity; INVOLVED IN: response to stress, protein ubiquitination; LOCATED IN: ubiquitin ligase complex; CONTAINS InterPro DOMAIN/s: UspA (InterPro:IPR006016), U box domain (InterPro:IPR003613); BEST Arabidopsis thaliana protein match is: RING/U-box superfamily protein (TAIR:AT1G01660.1); Has 2251 Blast hits to 2122 proteins in 140 sp…	PUB54	plant U-box 54	protein.degradation.ubiquitin.E3.RING				103	263	26	37	73	67	237	174	148	275	179	101	47	216	89	104	40	4.87858	13.1646	1.05961	2.45738	4.85953	3.38644	13.2863	9.15194	9.40865	14.8302	11.1673	5.55614	3.46225	13.8781	5.59999	5.11185	2.24037	6.3676	3.56778	10.6156	10.5179	7.64678	3.67611	6.18834
AT1G01690.1	Encodes a novel plant-specific protein that is involved in meiotic double strand break formation.	putative recombination initiation defects 3 (PRD3); Has 279 Blast hits to 273 proteins in 87 species: Archae - 2; Bacteria - 106; Metazoa - 105; Fungi - 5; Plants - 32; Viruses - 0; Other Eukaryotes - 29 (source: NCBI BLink).	PRD3	putative recombination initiation defects 3	not assigned.unknown				147	91	106	89	111	110	134	67	62	158	89	108	92	96	57	127	114	3.67785	2.40202	2.28224	3.12078	3.89226	2.92855	3.97085	1.85629	2.07729	4.45251	2.91998	3.13181	3.56387	3.25523	1.89121	3.29529	3.35612	2.78737	3.31386	2.63481	3.50143	2.90344	3.32571	0.7735
AT1G01695.1		Phosphatidylinositol N-acetyglucosaminlytransferase subunit P-related; FUNCTIONS IN: molecular_function unknown; INVOLVED IN: biological_process unknown; LOCATED IN: cellular_component unknown; BEST Arabidopsis thaliana protein match is: Protein of unknown function (DUF3741) (TAIR:AT4G00440.1); Has 30201 Blast hits to 17322 proteins in 780 species: Archae - 12; Bacteria - 1396; Metazoa - 17338; F…	TRM33	Phosphatidylinositol N-acetyglucosaminlytransferase subunit P-like protein	not assigned.unknown				6	8	15	5	10	9	1	5	3	4	10	7	5	10	8	4	6	0.200981	0.2829	0.432365	0.234776	0.469966	0.321141	0.0396635	0.185664	0.134687	0.151533	0.439994	0.271981	0.259758	0.454135	0.355605	0.13899	0.236933	0.305415	0.341961	0.120005	0.287836	0.356499	0.187962	0.117324
AT1G01700.1	Encodes a member of KPP-like gene family, homolog of KPP (kinase partner protein) gene in tomato. Also a member of the RopGEF (guanine nucleotide exchange factor) family, containing the novel PRONE domain (plant-specific Rop nucleotide exchanger), which is exclusively active towards members of the Rop subfamily.	RHO guanyl-nucleotide exchange factor 2 (ROPGEF2); CONTAINS InterPro DOMAIN/s: Rop nucleotide exchanger, PRONE (InterPro:IPR005512); BEST Arabidopsis thaliana protein match is: RHO guanyl-nucleotide exchange factor 3 (TAIR:AT4G00460.2); Has 308 Blast hits to 304 proteins in 16 species: Archae - 0; Bacteria - 0; Metazoa - 0; Fungi - 0; Plants - 308; Viruses - 0; Other Eukaryotes - 0 (source: NCBI …	ROPGEF2	RHO guanyl-nucleotide exchange factor 2	signalling.G-proteins				49	46	64	33	37	55	41	29	16	50	51	43	29	28	29	46	55	1.44544	1.43208	1.62461	1.36445	1.53056	1.72741	1.43228	0.947847	0.632337	1.66487	1.97457	1.47078	1.32571	1.11963	1.13486	1.40744	1.91096	1.50071	1.54081	1.00415	1.70341	1.1934	1.6592	0.107508
AT1G01710.1		Acyl-CoA thioesterase family protein; FUNCTIONS IN: cyclic nucleotide binding, acyl-CoA thioesterase activity; INVOLVED IN: acyl-CoA metabolic process; LOCATED IN: peroxisome; EXPRESSED IN: 22 plant structures; EXPRESSED DURING: 14 growth stages; CONTAINS InterPro DOMAIN/s: Cyclic nucleotide-binding (InterPro:IPR000595), Cyclic nucleotide-binding-like (InterPro:IPR018490), Acyl-CoA thioesterase (…	AT1G01710	acyl-CoA thioesterase II	lipid metabolism.lipid degradation.beta-oxidation.acyl-CoA thioesterase				1037	1154	1145	786	706	1228	716	744	650	1153	895	1120	566	819	796	1066	911	17.0788	20.0382	16.2288	18.139	16.2788	21.4976	13.9704	13.5544	14.3233	21.3009	19.2965	21.3622	14.4082	18.2746	17.3737	18.203	17.6211	17.7819	18.6385	13.9494	20.6532	16.6855	17.9121	1.99967
AT1G01720.1	Belongs to a large family of putative transcriptional activators with NAC domain. Transcript level increases in response to wounding and abscisic acid. ATAF1 attentuates ABA signaling and sythesis. Mutants are hyposensitive to ABA.	ATAF1; CONTAINS InterPro DOMAIN/s: No apical meristem (NAM) protein (InterPro:IPR003441); BEST Arabidopsis thaliana protein match is: NAC domain containing protein 32 (TAIR:AT1G77450.1); Has 3043 Blast hits to 3037 proteins in 75 species: Archae - 0; Bacteria - 0; Metazoa - 0; Fungi - 0; Plants - 3043; Viruses - 0; Other Eukaryotes - 0 (source: NCBI BLink).	ATAF1	NAC (No Apical Meristem) domain transcriptional regulator superfamily protein	development.unspecified				720	760	795	281	214	436	486	509	584	585	572	586	245	630	768	378	325	23.8279	26.5517	22.64	13.0357	9.93591	15.3698	19.0451	18.6725	25.9029	21.8911	24.8632	22.4943	12.5742	28.2662	33.7268	12.9765	12.6785	24.3399	12.7805	21.2068	23.0829	24.8557	12.8275	2.00548
AT1G01725.1		unknown protein; FUNCTIONS IN: molecular_function unknown; INVOLVED IN: biological_process unknown; LOCATED IN: endomembrane system; EXPRESSED IN: 23 plant structures; EXPRESSED DURING: 14 growth stages; BEST Arabidopsis thaliana protein match is: unknown protein (TAIR:AT4G00530.1); Has 20 Blast hits to 20 proteins in 7 species: Archae - 0; Bacteria - 0; Metazoa - 0; Fungi - 0; Plants - 20; Virus…	AT1G01725	adenylosuccinate synthetase	not assigned.unknown				102	110	169	99	99	189	76	114	69	118	129	156	81	96	99	144	148	13.0121	14.9293	18.5485	17.7507	17.9336	26.001	11.4553	16.3205	11.9127	17.8117	22.0368	23.3	16.3367	16.6715	16.8919	19.115	22.7382	15.4966	20.5618	13.2295	21.0495	16.6334	20.9266	2.81146
AT1G01730.1		unknown protein; FUNCTIONS IN: molecular_function unknown; INVOLVED IN: biological_process unknown; LOCATED IN: chloroplast; EXPRESSED IN: 23 plant structures; EXPRESSED DURING: 13 growth stages; Has 42 Blast hits to 42 proteins in 17 species: Archae - 0; Bacteria - 2; Metazoa - 5; Fungi - 1; Plants - 34; Viruses - 0; Other Eukaryotes - 0 (source: NCBI BLink).	AT1G01730	hypothetical protein	not assigned.unknown				610	586	545	567	559	799	505	476	436	941	845	880	338	548	427	937	744	30.9862	31.4664	23.8199	40.3896	39.9257	43.3299	30.3587	26.8621	29.7362	54.5144	56.5756	51.9345	26.7187	37.7658	28.822	49.398	44.7245	28.7575	41.2151	28.9857	54.3415	31.1022	47.0613	4.28282
AT1G01740.1		Protein kinase protein with tetratricopeptide repeat domain; FUNCTIONS IN: protein serine/threonine kinase activity, binding, protein kinase activity, kinase activity, ATP binding; INVOLVED IN: protein amino acid phosphorylation, N-terminal protein myristoylation; LOCATED IN: plasma membrane; EXPRESSED IN: 22 plant structures; EXPRESSED DURING: 13 growth stages; CONTAINS InterPro DOMAIN/s: Tetrat…	BSK4	kinase with tetratricopeptide repeat domain-containing protein	protein.postranslational modification				69.8917	131.587	116.807	118.587	103.725	199.639	69.5221	85.984	84.3381	166.209	108.64	187.514	78	37.3192	89.5221	95.8887	41.3144	1.80004	3.57563	2.58883	4.28055	3.7444	5.47176	2.12067	2.4525	2.90899	4.82321	3.66963	5.59777	3.11081	1.30267	3.05774	2.56123	1.25224	2.65483	4.4989	2.49405	4.69687	2.49041	1.90674	0.889633
AT1G01740.2		Protein kinase protein with tetratricopeptide repeat domain; FUNCTIONS IN: protein serine/threonine kinase activity, binding, protein kinase activity, kinase activity, ATP binding; INVOLVED IN: protein amino acid phosphorylation; EXPRESSED IN: 22 plant structures; EXPRESSED DURING: 13 growth stages; CONTAINS InterPro DOMAIN/s: Tetratricopeptide-like helical (InterPro:IPR011990), Protein kinase, c…	BSK4	kinase with tetratricopeptide repeat domain-containing protein	protein.postranslational modification				97.1083	183.413	105.193	89.4127	55.2752	89.3607	64.4779	70.016	40.6619	48.791	86.3603	90.4862	0	76.6808	57.4779	91.1113	163.686	2.43591	4.85396	2.27076	3.14342	1.94331	2.38528	1.91565	1.94491	1.36591	1.37857	2.84078	2.63078	0	2.60691	1.91204	2.37024	4.83146	3.18688	2.49067	1.74216	2.28338	1.50632	3.60085	1.4461
AT1G01750.1		actin depolymerizing factor 11 (ADF11); FUNCTIONS IN: actin binding; INVOLVED IN: biological_process unknown; LOCATED IN: intracellular; EXPRESSED IN: 6 plant structures; EXPRESSED DURING: 4 anthesis, petal differentiation and expansion stage; CONTAINS InterPro DOMAIN/s: Actin-binding, cofilin/tropomyosin type (InterPro:IPR002108); BEST Arabidopsis thaliana protein match is: actin depolymerizing …	ADF11	actin depolymerizing factor 11	cell.organisation				10	16	21	12	14	13	17	8	11	17	15	24	15	16	12	26	18	0.623868	1.0561	1.12716	1.05011	1.22985	0.867117	1.25469	0.555276	0.922479	1.21641	1.23629	1.74143	1.45964	1.35486	0.995686	1.68399	1.33235	0.935709	1.04903	0.910815	1.39804	1.27006	1.50817	0.27239
AT1G01760.1		adenosine deaminases;RNA binding;RNA binding;adenosine deaminases; FUNCTIONS IN: RNA binding, adenosine deaminase activity; INVOLVED IN: RNA processing; LOCATED IN: cellular_component unknown; CONTAINS InterPro DOMAIN/s: Adenosine deaminase/editase (InterPro:IPR002466); Has 30201 Blast hits to 17322 proteins in 780 species: Archae - 12; Bacteria - 1396; Metazoa - 17338; Fungi - 3422; Plants - 503…	AT1G01760	denosine deaminases acting on tRNA	RNA.processing				68	65	83	66	70	97	55	35	30	83	77	80	39	68	58	93	75	2.25817	2.27871	2.37182	3.07233	3.26131	3.43125	2.16272	1.28841	1.33523	3.1168	3.35858	3.0815	2.00855	3.06148	2.55588	3.20365	2.93596	2.3029	3.25496	1.59545	3.18563	2.54197	3.06981	0.0605636
AT1G01770.1		unknown protein; CONTAINS InterPro DOMAIN/s: Protein of unknown function DUF1446 (InterPro:IPR010839); Has 1597 Blast hits to 1509 proteins in 306 species: Archae - 4; Bacteria - 843; Metazoa - 22; Fungi - 131; Plants - 31; Viruses - 0; Other Eukaryotes - 566 (source: NCBI BLink).	AT1G01770	propionyl-CoA carboxylase	not assigned.unknown				365	332	381	300	347	405	245	203	224	439	343	440	225	276	297	465	345	6.36477	6.1043	5.71762	7.33052	8.47249	7.50779	5.06128	3.91623	5.22677	8.59105	7.83153	8.88654	6.06557	6.52081	6.86404	8.40744	7.06707	6.06223	7.77027	4.73476	8.43637	6.48347	7.73726	0.32562
AT1G01780.1	Encodes a member of the Arabidopsis LIM proteins: a family of actin bundlers with distinct expression patterns. WLIM1, WLIM2a, and WLIM2b are widely expressed, whereas PLIM2a, PLIM2b, and PLIM2c are predominantly expressed in pollen. Regulates actin cytoskeleton organization.	GATA type zinc finger transcription factor family protein; FUNCTIONS IN: zinc ion binding; INVOLVED IN: biological_process unknown; LOCATED IN: cellular_component unknown; EXPRESSED IN: 23 plant structures; EXPRESSED DURING: 15 growth stages; CONTAINS InterPro DOMAIN/s: Zinc finger, LIM-type (InterPro:IPR001781); BEST Arabidopsis thaliana protein match is: GATA type zinc finger transcription fact…	PLIM2b	GATA type zinc finger transcription factor family protein	development.unspecified				165	142	178	170	145	169	93	102	97	159	142	184	96	85	105	178	136	8.07306	7.34329	7.4935	11.6636	9.97292	8.82551	5.38537	5.54303	6.37095	8.8642	9.15409	10.4576	7.30746	5.64184	6.82555	9.03821	7.87131	7.63662	10.154	5.76645	9.49196	6.59162	8.45476	0.385361
AT1G01790.1	K efflux antiporter KEA1	K+ efflux antiporter 1 (KEA1); FUNCTIONS IN: potassium:hydrogen antiporter activity, potassium ion transmembrane transporter activity; INVOLVED IN: potassium ion transport, cation transport, metabolic process, transmembrane transport; LOCATED IN: chloroplast, chloroplast envelope; EXPRESSED IN: 23 plant structures; EXPRESSED DURING: 15 growth stages; CONTAINS InterPro DOMAIN/s: K+/H+ exchanger (I…	KEA1	K efflux antiporter 1	transport.potassium				8353	8743.83	12579	7203	7355	11511	4434	4138	5194	6621	7243	7247	5553	5489	5182	9824	8534	86.0861	94.9652	111.573	104.006	106.042	126.003	54.1486	47.1386	71.5773	76.3178	97.6023	86.4474	88.3485	76.6237	70.7427	104.957	103.155	97.5414	112.017	57.6215	86.7892	78.5716	104.056	12.9373
AT1G01800.1		NAD(P)-binding Rossmann-fold superfamily protein; FUNCTIONS IN: oxidoreductase activity, binding, catalytic activity; INVOLVED IN: oxidation reduction, metabolic process; LOCATED IN: plant-type cell wall; EXPRESSED IN: 22 plant structures; EXPRESSED DURING: 13 growth stages; CONTAINS InterPro DOMAIN/s: NAD(P)-binding domain (InterPro:IPR016040), Glucose/ribitol dehydrogenase (InterPro:IPR002347),…	AT1G01800	NAD(P)-binding Rossmann-fold superfamily protein	misc.short chain dehydrogenase/reductase (SDR)				1339	1610	1970	1430.7	1526	2126.35	1291.32	1369	1235	1688.96	1622.51	1880	880	1394	1161.48	2200.21	1555	54.7456	69.5307	69.3055	82.0104	87.6165	92.6957	62.5011	62.1051	67.7267	78.3756	87.264	89.2196	55.8843	77.2928	63.0527	93.3342	75.0721	64.5273	87.4409	64.111	84.9531	65.4099	84.2031	8.47192
AT1G01800.2		NAD(P)-binding Rossmann-fold superfamily protein; FUNCTIONS IN: oxidoreductase activity, binding, catalytic activity; INVOLVED IN: oxidation reduction, metabolic process; LOCATED IN: plant-type cell wall; EXPRESSED IN: 22 plant structures; EXPRESSED DURING: 13 growth stages; CONTAINS InterPro DOMAIN/s: NAD(P)-binding domain (InterPro:IPR016040), Glucose/ribitol dehydrogenase (InterPro:IPR002347),…	AT1G01800	NAD(P)-binding Rossmann-fold superfamily protein	misc.short chain dehydrogenase/reductase (SDR)				0	0	0	13.2989	0	5.64826	12.6843	0	0	5.04381	5.48751	0	0	0	6.51843	5.79412	0	0	0	0	0.759094	0	0.245184	0.611346	0	0	0.233048	0.293879	0	0	0	0.352363	0.244751	0	0	0.334759	0.203782	0.175642	0.117454	0.122375	0
AT1G01810.1		unknown protein; Has 12 Blast hits to 12 proteins in 5 species: Archae - 0; Bacteria - 0; Metazoa - 5; Fungi - 0; Plants - 7; Viruses - 0; Other Eukaryotes - 0 (source: NCBI BLink).	AT1G01810	hypothetical protein	not assigned.unknown				9	12	3	4	5	4	6	16	7	4	6	6	5	2	3	7	6	0.711058	1.00436	0.203895	0.443451	0.557405	0.338596	0.560513	1.40934	0.744594	0.365432	0.628334	0.552189	0.618213	0.214593	0.315641	0.574433	0.564515	0.639771	0.446484	0.904816	0.515318	0.382816	0.569474	0.404966
AT1G01820.1	member of the peroxin11 (PEX11) gene family, integral to peroxisome membrane, controls peroxisome proliferation.	peroxin 11c (PEX11C); CONTAINS InterPro DOMAIN/s: Peroxisomal biogenesis factor 11 (InterPro:IPR008733); BEST Arabidopsis thaliana protein match is: peroxin 11D (TAIR:AT2G45740.3); Has 289 Blast hits to 289 proteins in 81 species: Archae - 0; Bacteria - 0; Metazoa - 46; Fungi - 41; Plants - 179; Viruses - 0; Other Eukaryotes - 23 (source: NCBI BLink).	PEX11C	peroxin 11c	cell.organisation				1024	1434	1283	1125	1029	1659	858	948	814	1429	1366	1611	627	846	857	1633	1323	44.0137	65.1161	47.4506	67.7973	62.127	76.0511	43.655	45.2236	46.9385	69.7839	77.2677	80.39	41.8771	49.3177	48.9173	72.8298	67.1783	52.1935	68.6585	45.2724	75.8139	46.704	70.0041	11.3225
AT1G01830.1		ARM repeat superfamily protein; FUNCTIONS IN: binding; LOCATED IN: cellular_component unknown; EXPRESSED IN: 22 plant structures; EXPRESSED DURING: 13 growth stages; CONTAINS InterPro DOMAIN/s: Armadillo-like helical (InterPro:IPR011989), Armadillo (InterPro:IPR000225), Armadillo-type fold (InterPro:IPR016024); BEST Arabidopsis thaliana protein match is: ARM repeat superfamily protein (TAIR:AT2G4…	AT1G01830	ARM repeat superfamily protein	not assigned.no ontology.armadillo/beta-catenin repeat family protein				104.873	176.065	83.3677	0.0386378	58.8304	61.8459	119.228	117.074	88.0309	1.37776e-08	171.322	153.683	59.7893	1.22814e-08	88.9775	179.094	116.91	2.0661	3.658	1.41345	0.00106671	1.62332	1.29566	2.78254	2.55243	2.32123	3.04948e-10	4.42138	3.50748	1.82183	3.27852e-10	2.32369	3.65863	2.707	2.37918	0.973349	2.55207	2.64295	1.38184	3.18282	1.15456
AT1G01830.2		ARM repeat superfamily protein; FUNCTIONS IN: binding; LOCATED IN: cellular_component unknown; EXPRESSED IN: 22 plant structures; EXPRESSED DURING: 13 growth stages; CONTAINS InterPro DOMAIN/s: Armadillo-like helical (InterPro:IPR011989), Armadillo (InterPro:IPR000225), Armadillo-type fold (InterPro:IPR016024); BEST Arabidopsis thaliana protein match is: ARM repeat superfamily protein (TAIR:AT2G4…	AT1G01830	ARM repeat superfamily protein	not assigned.no ontology.armadillo/beta-catenin repeat family protein				651.892	762.434	680.517	482.001	498.319	803.443	398.323	436.995	415.938	855.775	477.652	838.487	364.505	619.467	509.67	667.306	467.402	12.6427	15.5933	11.3579	13.0994	13.5353	16.5688	9.15115	9.37837	10.7962	18.6432	12.134	18.8377	10.9329	16.2786	13.1024	13.4194	10.653	13.198	14.4012	9.77524	16.5383	13.438	12.0362	2.17161
AT1G01830.3		ARM repeat superfamily protein; FUNCTIONS IN: binding; LOCATED IN: cellular_component unknown; EXPRESSED IN: 22 plant structures; EXPRESSED DURING: 13 growth stages; CONTAINS InterPro DOMAIN/s: Armadillo-like helical (InterPro:IPR011989), Armadillo (InterPro:IPR000225), Armadillo-type fold (InterPro:IPR016024); BEST Arabidopsis thaliana protein match is: ARM repeat superfamily protein (TAIR:AT2G4…	AT1G01830	ARM repeat superfamily protein	not assigned.no ontology.armadillo/beta-catenin repeat family protein				287.235	378.501	287.115	278.96	212.851	319.711	162.449	111.931	103.031	308.225	325.026	308.83	174.706	111.533	158.353	304.6	481.688	4.84228	6.72773	4.16553	6.58981	5.02399	5.72936	3.24446	2.08743	2.32408	5.82977	7.1737	6.02975	4.55271	2.54747	3.53796	5.32422	9.5379	5.24518	5.78105	2.55199	6.34441	3.54605	7.43106	1.32777
AT1G01840.1		unknown protein; Has 23 Blast hits to 23 proteins in 9 species: Archae - 0; Bacteria - 0; Metazoa - 0; Fungi - 0; Plants - 23; Viruses - 0; Other Eukaryotes - 0 (source: NCBI BLink).	AT1G01840	AP2-like ethylene-responsive transcription factor SNZ	not assigned.unknown				27.832	24.8681	52.0583	43.3209	24.7409	41.8751	15.7775	15.7715	10.8464	24.7406	26.233	16.1229	14.0401	18.554	15.9811	32.3042	16.8696	1.5992	1.51124	2.57356	3.49116	2.0005	2.57089	1.07265	1.0076	0.837329	1.62653	1.98937	1.07697	1.25708	1.44674	1.22081	1.92677	1.14879	1.89467	2.68752	0.972526	1.56429	1.30821	1.53778	0.589582
AT1G01860.1	dimethyladenosine transferase	PALEFACE 1 (PFC1); FUNCTIONS IN: mRNA (2'-O-methyladenosine-N6-)-methyltransferase activity; INVOLVED IN: response to cold; LOCATED IN: chloroplast; EXPRESSED IN: 22 plant structures; EXPRESSED DURING: 13 growth stages; CONTAINS InterPro DOMAIN/s: Ribosomal RNA adenine methylase transferase, N-terminal (InterPro:IPR020598), Ribosomal RNA adenine methylase transferase, conserved site (InterPro:IPR…	PFC1	Ribosomal RNA adenine dimethylase family protein	RNA.processing				303.168	289.132	479.942	365.679	363.259	447.125	189.223	228.228	210.154	378.259	296.767	356.877	192.96	244.446	263.019	468.696	353.13	9.74863	9.81409	13.2803	16.4827	16.3857	15.3132	7.20508	8.13413	9.05605	13.7471	12.5315	13.3095	9.62068	10.6562	11.2222	15.6334	13.3825	10.9477	16.0605	8.13175	13.196	10.4997	14.5079	2.02038
AT1G01870.1		tRNA-Val (anticodon: TAC)	AT1G01870	tRNA-Val	protein.synthesis.transfer RNA.nucleus.tRNA-Val				0.142857	0.2	0	0	0	0	0.2	0	0	0	0	0	0	0.2	0	0	0	0.267451	0.340229	0	0	0	0	0.362592	0	0	0	0	0	0	0.450656	0	0	0	0.20256	0	0.120864	0	0.150219	0	0.179157
AT1G01880.1		5'-3' exonuclease family protein; FUNCTIONS IN: DNA binding, catalytic activity, nuclease activity; INVOLVED IN: DNA repair; LOCATED IN: cellular_component unknown; CONTAINS InterPro DOMAIN/s: XPG N-terminal (InterPro:IPR006085), DNA repair protein (XPGC)/yeast Rad (InterPro:IPR006084), 5'-3' exonuclease, C-terminal subdomain (InterPro:IPR020045), Helix-hairpin-helix motif, class 2 (InterPro:IPR0…	AT1G01880	5'-3' exonuclease family protein	DNA.repair				57	20	48	47	41	6.06164	42	19	3.52821	37	45	45	22	6.26923	17	33	26	1.19113	0.440793	0.863206	1.37638	1.20018	0.134719	1.03966	0.439446	0.0986925	0.869152	1.23212	1.08949	0.711222	0.177525	0.470957	0.715088	0.63873	0.83171	0.90376	0.525933	1.06359	0.453235	0.676909	0.376159
AT1G01880.2		5'-3' exonuclease family protein; FUNCTIONS IN: DNA binding, catalytic activity, nuclease activity; INVOLVED IN: DNA repair; LOCATED IN: cellular_component unknown; CONTAINS InterPro DOMAIN/s: XPG N-terminal (InterPro:IPR006085), DNA repair protein (XPGC)/yeast Rad (InterPro:IPR006084), 5'-3' exonuclease, C-terminal subdomain (InterPro:IPR020045), Helix-hairpin-helix motif, class 2 (InterPro:IPR0…	AT1G01880	5'-3' exonuclease family protein	DNA.repair				5.24999e-06	0	0	0	0	30.9384	0	0	17.4718	0	0	0	0	30.7308	0	0	0	1.09887e-07	0	0	0	0	0.688724	0	0	0.489526	0	0	0	0	0.871617	0	0	0	3.6629e-08	0.229575	0.163175	0	0.290539	0	6.34433e-08
AT1G01890.1		tRNA-Lys (anticodon: CTT)	AT1G01890	tRNA-Lys	protein.synthesis.transfer RNA.nucleus.tRNA-Lys				0	0.0666667	0	0	0	0	0	0	0.0625	0	0	0	0	0.0625	0	0	0	0	0.11341	0	0	0	0	0	0	0.15835	0	0	0	0	0.14083	0	0	0	0.0378033	0	0.0527833	0	0.0469433	0	0.0654773
AT1G01900.1	Encodes AtSBT1.1, a subtilisin-like serine protease. Cleaves the phytosulfokine AtPSK4, a growth promoting peptide.	SBTI1.1; FUNCTIONS IN: serine-type endopeptidase activity; INVOLVED IN: proteolysis, negative regulation of catalytic activity; LOCATED IN: extracellular matrix, apoplast, cell wall; EXPRESSED IN: 19 plant structures; EXPRESSED DURING: 11 growth stages; CONTAINS InterPro DOMAIN/s: Protease-associated PA (InterPro:IPR003137), Peptidase S8/S53, subtilisin/kexin/sedolisin (InterPro:IPR000209), Pepti…	SBTI1.1	subtilase family protein	protein.degradation.subtilases				324	206	580	433	373	635	204	161	116	297	245	229	219	168	149	249	337	5.41003	3.62665	8.33461	10.1312	8.71997	11.2708	4.03552	2.97387	2.59165	5.56351	5.35574	4.42844	5.65241	3.80061	3.29723	4.31088	6.60913	5.79043	10.0407	3.20035	5.1159	4.25008	5.46	2.37692
AT1G01910.1		P-loop containing nucleoside triphosphate hydrolases superfamily protein; FUNCTIONS IN: ATP binding; INVOLVED IN: cellular metal ion homeostasis, anion transport; LOCATED IN: membrane; EXPRESSED IN: 24 plant structures; EXPRESSED DURING: 15 growth stages; CONTAINS InterPro DOMAIN/s: ATPase, anion-transporting (InterPro:IPR003348); BEST Arabidopsis thaliana protein match is: P-loop containing nucl…	AT1G01910	P-loop containing nucleoside triphosphate hydrolases superfamily protein	transport.unspecified anions.arsenite-transporting ATPase				377.964	338.054	431.201	484.75	469.391	534.629	312.046	306.532	259.958	683.965	467.406	468.473	221.23	317.957	307.37	548.367	420.566	12.0036	11.3326	11.7842	21.5795	20.9104	18.0829	11.7352	10.7894	11.0634	24.5456	19.4916	17.2549	10.893	13.6892	12.952	18.0646	15.7397	11.7068	20.1909	11.196	20.4307	12.5114	16.9021	0.342131
AT1G01910.2		P-loop containing nucleoside triphosphate hydrolases superfamily protein; FUNCTIONS IN: ATP binding; INVOLVED IN: cellular metal ion homeostasis, anion transport; LOCATED IN: membrane; EXPRESSED IN: 24 plant structures; EXPRESSED DURING: 15 growth stages; CONTAINS InterPro DOMAIN/s: ATPase, anion-transporting (InterPro:IPR003348); BEST Arabidopsis thaliana protein match is: P-loop containing nucl…	AT1G01910	P-loop containing nucleoside triphosphate hydrolases superfamily protein	transport.unspecified anions.arsenite-transporting ATPase				550.772	687.8	742.525	432.002	445.278	536.504	559.129	492.137	384.819	561.487	429.572	553.59	416.839	475.271	395.501	685.682	535.366	15.7529	20.76	18.2755	17.3184	17.8574	16.3359	18.9389	15.5942	14.7445	18.1196	16.123	18.3576	18.4725	18.4258	15.0054	20.3409	18.0318	18.2628	17.1706	16.4259	17.5334	17.3012	19.1864	2.50357
AT1G01910.3		P-loop containing nucleoside triphosphate hydrolases superfamily protein; FUNCTIONS IN: ATP binding; INVOLVED IN: cellular metal ion homeostasis, anion transport; LOCATED IN: membrane; EXPRESSED IN: 24 plant structures; EXPRESSED DURING: 15 growth stages; CONTAINS InterPro DOMAIN/s: ATPase, anion-transporting (InterPro:IPR003348); BEST Arabidopsis thaliana protein match is: P-loop containing nucl…	AT1G01910	P-loop containing nucleoside triphosphate hydrolases superfamily protein	transport.unspecified anions.arsenite-transporting ATPase				8.29608	0	0	0	0	0	0	8.05398	0	0	0	7.59883	0	0	0	0	0	0.233812	0	0	0	0	0	0	0.25146	0	0	0	0.248292	0	0	0	0	0	0.0779373	0	0.08382	0.082764	0	0	0.134991
AT1G01910.4		P-loop containing nucleoside triphosphate hydrolases superfamily protein; FUNCTIONS IN: ATP binding; INVOLVED IN: cellular metal ion homeostasis, anion transport; LOCATED IN: membrane; EXPRESSED IN: 24 plant structures; EXPRESSED DURING: 15 growth stages; CONTAINS InterPro DOMAIN/s: ATPase, anion-transporting (InterPro:IPR003348); BEST Arabidopsis thaliana protein match is: P-loop containing nucl…	AT1G01910	P-loop containing nucleoside triphosphate hydrolases superfamily protein	transport.unspecified anions.arsenite-transporting ATPase				85.968	81.9095	93.0746	65.8468	86.3309	90.3044	90.8245	82.2767	80.1264	93.0365	93.2281	105.062	64.9314	56.1351	120.933	132.951	96.6328	2.43355	2.44683	2.26727	2.61256	3.42649	2.72129	3.04483	2.58019	3.03844	2.97107	3.46294	3.44808	2.84774	2.15391	4.54094	3.90345	3.22106	2.38255	2.92011	2.88782	3.29403	3.18086	3.56225	0.100056
AT1G01910.5		P-loop containing nucleoside triphosphate hydrolases superfamily protein; FUNCTIONS IN: ATP binding; INVOLVED IN: anion transport; LOCATED IN: endomembrane system, membrane; EXPRESSED IN: 24 plant structures; EXPRESSED DURING: 15 growth stages; BEST Arabidopsis thaliana protein match is: P-loop containing nucleoside triphosphate hydrolases superfamily protein (TAIR:AT3G10350.2); Has 30201 Blast h…	AT1G01910	P-loop containing nucleoside triphosphate hydrolases superfamily protein	transport.unspecified anions.arsenite-transporting ATPase				0	12.2363	6.19918	5.40127	0	4.56214	0	0	5.09646	8.5115	4.79449	5.276	0	4.63667	6.19617	0	4.43554	0	0.407171	0.16817	0.238676	0	0.153166	0	0	0.215296	0.303172	0.198458	0.192892	0	0.198155	0.25917	0	0.164771	0.19178	0.130614	0.0717653	0.231507	0.152442	0.0823855	0.20461
AT1G01920.1		SET domain-containing protein; BEST Arabidopsis thaliana protein match is: Rubisco methyltransferase family protein (TAIR:AT1G14030.1); Has 611 Blast hits to 608 proteins in 165 species: Archae - 0; Bacteria - 0; Metazoa - 143; Fungi - 239; Plants - 164; Viruses - 0; Other Eukaryotes - 65 (source: NCBI BLink).	AT1G01920	SET domain-containing protein	not assigned.no ontology.SET domain-containing protein				8.98276	0	5.42739	15.8319	4.45772	28.6308	0	4.68866	4.42166	7.5367	21.2126	4.54779	0	0	16.2747	17.0701	8.91813	0.20112	0	0.104574	0.496764	0.139836	0.681897	0	0.11621	0.132539	0.189823	0.622483	0.117987	0	0	0.483124	0.396336	0.234814	0.101898	0.439499	0.0829163	0.310098	0.161041	0.315575	0.100587
AT1G01920.2		SET domain-containing protein; CONTAINS InterPro DOMAIN/s: SET domain (InterPro:IPR001214); BEST Arabidopsis thaliana protein match is: Rubisco methyltransferase family protein (TAIR:AT1G14030.1); Has 35333 Blast hits to 34131 proteins in 2444 species: Archae - 798; Bacteria - 22429; Metazoa - 974; Fungi - 991; Plants - 531; Viruses - 0; Other Eukaryotes - 9610 (source: NCBI BLink).	AT1G01920	SET domain-containing protein	not assigned.no ontology.SET domain-containing protein				298.017	300	356.573	330.168	277.542	390.369	228	177.311	216.578	329.463	276.787	320.452	174	169	223.725	432.93	405.082	6.71146	7.12643	6.9105	10.4204	8.75732	9.35184	6.08199	4.42048	6.52993	8.34703	8.16996	8.36244	6.06408	5.15766	6.68028	10.1106	10.7284	6.91613	9.50985	5.67747	8.29314	5.96734	10.4195	0.207542
AT1G01930.1		zinc finger protein-related; FUNCTIONS IN: zinc ion binding; INVOLVED IN: biological_process unknown; LOCATED IN: intracellular; EXPRESSED IN: 24 plant structures; EXPRESSED DURING: 15 growth stages; CONTAINS InterPro DOMAIN/s: Zinc finger, C2H2-like (InterPro:IPR015880), Ankyrin repeat-containing domain (InterPro:IPR020683), Ankyrin repeat (InterPro:IPR002110); Has 1975 Blast hits to 1659 protei…	AT1G01930	zinc finger protein-like protein	RNA.regulation of transcription.unclassified				341	375	350	220	201	262	227	222	185	333	250	283	192	222	249	339	253	7.11429	8.25142	6.28399	6.43215	5.87422	5.81344	5.60998	5.12623	5.16648	7.80954	6.83397	6.84055	6.19691	6.27613	6.88692	7.33398	6.2052	7.21657	6.03994	5.3009	7.16135	6.45332	6.76959	0.987695
AT1G01940.1		Cyclophilin-like peptidyl-prolyl cis-trans isomerase family protein; FUNCTIONS IN: peptidyl-prolyl cis-trans isomerase activity; INVOLVED IN: protein folding; LOCATED IN: cellular_component unknown; EXPRESSED IN: 23 plant structures; EXPRESSED DURING: 13 growth stages; CONTAINS InterPro DOMAIN/s: Cyclophilin-like (InterPro:IPR015891), Peptidyl-prolyl cis-trans isomerase, cyclophilin-type (InterPr…	AT1G01940	Cyclophilin-like peptidyl-prolyl cis-trans isomerase family protein	cell.cycle.peptidylprolyl isomerase				236	328	244	258	252	340	258	242	177	302	225	287	110	151	199	315	300	15.5538	22.8776	13.8349	23.8529	23.3965	23.9685	20.1138	17.7525	15.6865	22.8675	19.6042	22.0065	11.3158	13.5096	17.448	21.5553	23.4768	17.4221	23.7393	17.8509	21.4927	14.0911	22.516	4.80214
AT1G01950.1	Encodes a member of the armadillo/beta-catenin repeat kinesin motor family. Mutants have twisted roots due to abnormal cell file rotation; the phenotype is dependent on microtubules.	armadillo repeat kinesin 2 (ARK2); FUNCTIONS IN: microtubule motor activity, binding, ATP binding; INVOLVED IN: root development; LOCATED IN: chloroplast; EXPRESSED IN: 23 plant structures; EXPRESSED DURING: 13 growth stages; CONTAINS InterPro DOMAIN/s: Kinesin, motor region, conserved site (InterPro:IPR019821), Armadillo-like helical (InterPro:IPR011989), Armadillo (InterPro:IPR000225), Armadill…	ARK2	armadillo repeat kinesin 2	cell.organisation				787	645	833	532	519	719	511	444	533	762.637	674	630	478.727	535	499	839	685	10.669	9.21697	9.71864	10.1052	9.84686	10.3569	8.2078	6.65585	9.66499	11.5812	11.9547	9.88834	10.0253	9.82512	8.96298	11.7919	10.8993	9.8682	10.103	8.17621	11.1414	9.60447	11.3456	0.737479
AT1G01950.2	Encodes a member of the armadillo/beta-catenin repeat kinesin motor family. Mutants have twisted roots due to abnormal cell file rotation; the phenotype is dependent on microtubules.	armadillo repeat kinesin 2 (ARK2); FUNCTIONS IN: microtubule motor activity, binding, ATP binding; INVOLVED IN: root development; LOCATED IN: chloroplast; EXPRESSED IN: 23 plant structures; EXPRESSED DURING: 13 growth stages; CONTAINS InterPro DOMAIN/s: Kinesin, motor region, conserved site (InterPro:IPR019821), Armadillo-like helical (InterPro:IPR011989), Armadillo (InterPro:IPR000225), Armadill…	ARK2	armadillo repeat kinesin 2	cell.organisation				0	0	0	0	0	0	0	0	0	0	0	0	0	0	0	0	0	0	0	0	0	0	0	0	0	0	0	0	0	0	0	0	0	0	0	0	0	0	0	0	0
AT1G01950.3	Encodes a member of the armadillo/beta-catenin repeat kinesin motor family. Mutants have twisted roots due to abnormal cell file rotation; the phenotype is dependent on microtubules.	armadillo repeat kinesin 2 (ARK2); FUNCTIONS IN: microtubule motor activity, binding, ATP binding; INVOLVED IN: root development; LOCATED IN: chloroplast; EXPRESSED IN: 23 plant structures; EXPRESSED DURING: 13 growth stages; CONTAINS InterPro DOMAIN/s: Kinesin, motor region, conserved site (InterPro:IPR019821), Armadillo-like helical (InterPro:IPR011989), Armadillo (InterPro:IPR000225), Armadill…	ARK2	armadillo repeat kinesin 2	cell.organisation				0	0	0	0	0	0	0	0	0	24.3625	0	0	10.2735	0	0	0	0	0	0	0	0	0	0	0	0	0	0.361893	0	0	0.210469	0	0	0	0	0	0	0	0.120631	0.0701563	0	0
AT1G01960.1		embryo sac development arrest 10 (EDA10); FUNCTIONS IN: binding, ARF guanyl-nucleotide exchange factor activity, guanyl-nucleotide exchange factor activity; INVOLVED IN: megagametogenesis; LOCATED IN: cytosol, nucleus; EXPRESSED IN: 23 plant structures; EXPRESSED DURING: 13 growth stages; CONTAINS InterPro DOMAIN/s: SEC7-like (InterPro:IPR000904), Armadillo-type fold (InterPro:IPR016024), Protein…	EDA10	SEC7-like guanine nucleotide exchange family protein	signalling.G-proteins				2010	2054	2262	1963	2066	2646	1652	1229	1218	2603	2274	2339	1227	1558	1380	2623	2273	14.5013	15.6129	14.0454	19.8406	20.844	20.2679	14.1242	9.79697	11.7464	20.9729	21.4382	19.5263	13.6574	15.2232	13.185	19.6158	19.2205	14.7199	20.3175	11.8892	20.6458	14.0219	19.4182	0.806283
AT1G01970.1		Tetratricopeptide repeat (TPR)-like superfamily protein; CONTAINS InterPro DOMAIN/s: Pentatricopeptide repeat (InterPro:IPR002885); BEST Arabidopsis thaliana protein match is: pentatricopeptide (PPR) repeat-containing protein (TAIR:AT1G19520.1); Has 15559 Blast hits to 6864 proteins in 176 species: Archae - 0; Bacteria - 16; Metazoa - 92; Fungi - 19; Plants - 15148; Viruses - 0; Other Eukaryotes …	AT1G01970	Tetratricopeptide repeat (TPR)-like superfamily protein	not assigned.no ontology.pentatricopeptide (PPR) repeat-containing protein				967	828	1265	801	943	1062	551	668	665	888	733	780	573	723	935	1252	842	24.8882	22.4843	28.0178	28.8938	34.0189	29.0881	16.7962	19.0404	22.9218	25.7514	24.7427	23.2694	22.8372	25.2204	31.9148	33.4191	25.5038	25.1301	30.6669	19.5861	24.5878	26.6575	29.4614	2.77467
AT1G01980.1	member of Reticuline oxidase-like family	ATSEC1A; FUNCTIONS IN: electron carrier activity, oxidoreductase activity, FAD binding, catalytic activity; LOCATED IN: endomembrane system; EXPRESSED IN: 9 plant structures; EXPRESSED DURING: L mature pollen stage, M germinated pollen stage, 4 anthesis, C globular stage, petal differentiation and expansion stage; CONTAINS InterPro DOMAIN/s: FAD-binding, type 2 (InterPro:IPR016166), Berberine/ber…	AT1G01980	FAD-binding Berberine family protein	misc.nitrilases, *nitrile lyases, berberine bridge enzymes, reticuline oxidases, troponine reductases				0	0	0	1	1	2	0	0	0	0	1	0	0	0	0	0	0	0	0	0	0.0322198	0.0322135	0.0489157	0	0	0	0	0.030136	0	0	0	0	0	0	0	0.037783	0	0.0100453	0	0	0
AT1G01990.1		unknown protein; Has 32 Blast hits to 32 proteins in 6 species: Archae - 0; Bacteria - 0; Metazoa - 0; Fungi - 0; Plants - 32; Viruses - 0; Other Eukaryotes - 0 (source: NCBI BLink).	AT1G01990	hypothetical protein	not assigned.unknown				396	455	509	399	363	545	261	288	250	444	417	472	205	298	314	576	484	14.8954	18.0735	16.4747	21.0401	19.1667	21.8488	11.6233	12.0151	12.6089	18.9254	20.62	20.6016	11.9692	15.1993	15.6783	22.4775	21.4816	16.4812	20.6852	12.0824	20.049	14.2823	21.9795	1.58906
AT1G02000.1	UDP-D-glucuronate 4-epimerase	UDP-D-glucuronate 4-epimerase 2 (GAE2); FUNCTIONS IN: UDP-glucuronate 4-epimerase activity, catalytic activity; INVOLVED IN: cellular metabolic process, carbohydrate metabolic process, nucleotide-sugar metabolic process, metabolic process; LOCATED IN: cellular_component unknown; EXPRESSED IN: 25 plant structures; EXPRESSED DURING: 15 growth stages; CONTAINS InterPro DOMAIN/s: NAD-dependent epimer…	GAE2	UDP-D-glucuronate 4-epimerase 2	cell wall.precursor synthesis.GAE				400	368	483	284	280	345	282	303	268	347	375	395	247	269	277	468	307	9.46132	9.18231	9.83154	9.41442	9.28064	8.68198	7.90062	7.93512	8.48778	9.23862	11.6284	10.8275	9.04331	8.62291	8.68788	11.4798	8.54191	9.49172	9.12568	8.10784	10.5648	8.7847	10.0109	0.325681
AT1G02010.1	member of KEULE Gene Family	secretory 1A (SEC1A); FUNCTIONS IN: protein transporter activity; INVOLVED IN: protein secretion, vesicle-mediated transport, vesicle docking involved in exocytosis; LOCATED IN: cellular_component unknown; CONTAINS InterPro DOMAIN/s: Sec1-like protein (InterPro:IPR001619); BEST Arabidopsis thaliana protein match is: Sec1/munc18-like (SM) proteins superfamily (TAIR:AT1G12360.1); Has 1717 Blast hit…	SEC1A	secretory 1A	cell.division				488	504	599	311	303	417	314	291	358	385	369	432	346	358	326	473	376	8.14844	8.87296	8.60764	7.27665	7.08352	7.40146	6.21154	5.37514	7.99836	7.21196	8.0664	8.35408	8.9303	8.09893	7.21408	8.18894	7.37398	8.54301	7.25388	6.52835	7.87748	8.0811	7.78146	0.366558
AT1G02010.1	member of KEULE Gene Family	secretory 1A (SEC1A); FUNCTIONS IN: protein transporter activity; INVOLVED IN: protein secretion, vesicle-mediated transport, vesicle docking involved in exocytosis; LOCATED IN: cellular_component unknown; CONTAINS InterPro DOMAIN/s: Sec1-like protein (InterPro:IPR001619); BEST Arabidopsis thaliana protein match is: Sec1/munc18-like (SM) proteins superfamily (TAIR:AT1G12360.1); Has 1717 Blast hit…	SEC1A	secretory 1A	development.unspecified				488	504	599	311	303	417	314	291	358	385	369	432	346	358	326	473	376	8.14844	8.87296	8.60764	7.27665	7.08352	7.40146	6.21154	5.37514	7.99836	7.21196	8.0664	8.35408	8.9303	8.09893	7.21408	8.18894	7.37398	8.54301	7.25388	6.52835	7.87748	8.0811	7.78146	0.366558
AT1G02010.1	member of KEULE Gene Family	secretory 1A (SEC1A); FUNCTIONS IN: protein transporter activity; INVOLVED IN: protein secretion, vesicle-mediated transport, vesicle docking involved in exocytosis; LOCATED IN: cellular_component unknown; CONTAINS InterPro DOMAIN/s: Sec1-like protein (InterPro:IPR001619); BEST Arabidopsis thaliana protein match is: Sec1/munc18-like (SM) proteins superfamily (TAIR:AT1G12360.1); Has 1717 Blast hit…	SEC1A	secretory 1A	protein.targeting.secretory pathway				488	504	599	311	303	417	314	291	358	385	369	432	346	358	326	473	376	8.14844	8.87296	8.60764	7.27665	7.08352	7.40146	6.21154	5.37514	7.99836	7.21196	8.0664	8.35408	8.9303	8.09893	7.21408	8.18894	7.37398	8.54301	7.25388	6.52835	7.87748	8.0811	7.78146	0.366558
AT1G02010.2	member of KEULE Gene Family	secretory 1A (SEC1A); FUNCTIONS IN: protein transporter activity; INVOLVED IN: protein secretion, vesicle-mediated transport, vesicle docking involved in exocytosis; LOCATED IN: cellular_component unknown; CONTAINS InterPro DOMAIN/s: Sec1-like protein (InterPro:IPR001619); BEST Arabidopsis thaliana protein match is: Sec1/munc18-like (SM) proteins superfamily (TAIR:AT1G12360.1).	SEC1A	secretory 1A	development.unspecified				0	0	0	0	0	0	0	0	0	0	0	0	0	0	0	0	0	0	0	0	0	0	0	0	0	0	0	0	0	0	0	0	0	0	0	0	0	0	0	0	0
AT1G02010.2	member of KEULE Gene Family	secretory 1A (SEC1A); FUNCTIONS IN: protein transporter activity; INVOLVED IN: protein secretion, vesicle-mediated transport, vesicle docking involved in exocytosis; LOCATED IN: cellular_component unknown; CONTAINS InterPro DOMAIN/s: Sec1-like protein (InterPro:IPR001619); BEST Arabidopsis thaliana protein match is: Sec1/munc18-like (SM) proteins superfamily (TAIR:AT1G12360.1).	SEC1A	secretory 1A	protein.targeting.secretory pathway				0	0	0	0	0	0	0	0	0	0	0	0	0	0	0	0	0	0	0	0	0	0	0	0	0	0	0	0	0	0	0	0	0	0	0	0	0	0	0	0	0
AT1G02010.2	member of KEULE Gene Family	secretory 1A (SEC1A); FUNCTIONS IN: protein transporter activity; INVOLVED IN: protein secretion, vesicle-mediated transport, vesicle docking involved in exocytosis; LOCATED IN: cellular_component unknown; CONTAINS InterPro DOMAIN/s: Sec1-like protein (InterPro:IPR001619); BEST Arabidopsis thaliana protein match is: Sec1/munc18-like (SM) proteins superfamily (TAIR:AT1G12360.1).	SEC1A	secretory 1A	cell.division				0	0	0	0	0	0	0	0	0	0	0	0	0	0	0	0	0	0	0	0	0	0	0	0	0	0	0	0	0	0	0	0	0	0	0	0	0	0	0	0	0
AT1G02020.1		nitroreductase family protein; FUNCTIONS IN: oxidoreductase activity, acting on NADH or NADPH, nitrogenous group as acceptor, oxidoreductase activity; INVOLVED IN: metabolic process; LOCATED IN: chloroplast; EXPRESSED IN: 23 plant structures; EXPRESSED DURING: 13 growth stages; CONTAINS InterPro DOMAIN/s: Nitroreductase-like (InterPro:IPR000415); Has 762 Blast hits to 681 proteins in 314 species:…	AT1G02020	nitroreductase family protein	N-metabolism.misc				528.38	471.167	635.901	436.042	376.31	522.55	324.245	346.261	301.096	399.63	416.069	488.864	260.897	371.033	360.189	565.641	451.867	9.66853	9.09129	10.0139	11.1808	9.6427	10.1661	7.02879	7.01045	7.37315	8.21	9.97047	10.3616	7.38172	9.19907	8.73588	10.7322	9.71489	9.59124	10.3299	7.13746	9.51402	8.43889	10.2235	0.466136
AT1G02020.2		nitroreductase family protein; FUNCTIONS IN: oxidoreductase activity, acting on NADH or NADPH, nitrogenous group as acceptor, oxidoreductase activity; INVOLVED IN: metabolic process; LOCATED IN: chloroplast; EXPRESSED IN: 23 plant structures; EXPRESSED DURING: 13 growth stages; CONTAINS InterPro DOMAIN/s: Nitroreductase-like (InterPro:IPR000415); Has 35333 Blast hits to 34131 proteins in 2444 spe…	AT1G02020	nitroreductase family protein	N-metabolism.misc				7.62015	14.8328	21.0995	11.9577	12.6897	7.44999	20.7549	15.7394	13.9406	46.37	19.931	20.1361	14.1029	11.9673	0	11.3585	12.1327	0.134644	0.276353	0.320845	0.296073	0.313964	0.139946	0.434456	0.307685	0.329618	0.919604	0.461142	0.412096	0.385259	0.2865	0	0.208099	0.251846	0.243947	0.249994	0.357253	0.597614	0.22392	0.229972	0.0972384
AT1G02030.1		C2H2-like zinc finger protein; FUNCTIONS IN: sequence-specific DNA binding transcription factor activity, zinc ion binding, nucleic acid binding; INVOLVED IN: regulation of transcription; LOCATED IN: intracellular; CONTAINS InterPro DOMAIN/s: Zinc finger, C2H2-like (InterPro:IPR015880), Zinc finger, C2H2-type (InterPro:IPR007087); BEST Arabidopsis thaliana protein match is: C2H2-like zinc finger …	AT1G02030	C2H2-like zinc finger protein	RNA.regulation of transcription.C2H2 zinc finger family				4	3	6	4	6	11	2	6	1	9	10	11	1	6	2	7	8	0.0863007	0.0682684	0.111402	0.120942	0.181352	0.25243	0.0511132	0.143289	0.0288823	0.218348	0.28273	0.274982	0.033382	0.17542	0.057208	0.156612	0.202941	0.088657	0.184908	0.0744282	0.258687	0.08867	0.179777	0.0216631
AT1G02040.1		C2H2-type zinc finger family protein; FUNCTIONS IN: sequence-specific DNA binding transcription factor activity, zinc ion binding, nucleic acid binding; LOCATED IN: intracellular; CONTAINS InterPro DOMAIN/s: Zinc finger, C2H2-like (InterPro:IPR015880), Zinc finger, C2H2-type (InterPro:IPR007087); BEST Arabidopsis thaliana protein match is: C2H2-like zinc finger protein (TAIR:AT2G17180.1); Has 550…	AT1G02040	C2H2-type zinc finger family protein	RNA.regulation of transcription.C2H2 zinc finger family				1	0	0	0	0	0	0	1	0	2	0	0	0	1	2	0	0	0.04679	0	0	0	0	0	0	0.0519553	0	0.106517	0	0	0	0.0634693	0.12431	0	0	0.0155967	0	0.0173184	0.0355057	0.0625931	0	0.0270142
AT1G02050.1		LESS ADHESIVE POLLEN 6 (LAP6); FUNCTIONS IN: transferase activity, transferring acyl groups other than amino-acyl groups, catalytic activity, acyltransferase activity; INVOLVED IN: phenylpropanoid biosynthetic process, pollen exine formation; EXPRESSED IN: 11 plant structures; EXPRESSED DURING: 6 growth stages; CONTAINS InterPro DOMAIN/s: Chalcone/stilbene synthase, N-terminal (InterPro:IPR001099…	LAP6	Chalcone and stilbene synthase family protein	secondary metabolism.flavonoids.chalcones				107	125	119	94	86	123	88	95	89	152	95	142	59	74	96	187	125	3.5533	4.38214	3.40055	4.37575	4.00675	4.35097	3.46036	3.49711	3.96118	5.70787	4.1437	5.46966	3.03857	3.33161	4.23041	6.44175	4.89327	3.77866	4.24449	3.63955	5.10708	3.53353	5.66751	0.528177
AT1G02060.1		Tetratricopeptide repeat (TPR)-like superfamily protein; INVOLVED IN: biological_process unknown; LOCATED IN: chloroplast; EXPRESSED IN: 11 plant structures; EXPRESSED DURING: 6 growth stages; CONTAINS InterPro DOMAIN/s: Pentatricopeptide repeat (InterPro:IPR002885); BEST Arabidopsis thaliana protein match is: Tetratricopeptide repeat (TPR)-like superfamily protein (TAIR:AT2G37230.1); Has 43508 B…	AT1G02060	Tetratricopeptide repeat (TPR)-like superfamily protein	not assigned.no ontology.pentatricopeptide (PPR) repeat-containing protein				134	145	129	95	92	142	75	66	84	180	154	133	82	81	80	182	127	2.55002	2.90983	2.11264	2.53339	2.45191	2.87331	1.69077	1.3898	2.13936	3.84711	3.83848	2.93187	2.41319	2.0886	2.01798	3.59129	2.84005	2.52416	2.61954	1.73998	3.53915	2.17326	3.21567	0.399223
AT1G02065.1	Encodes an SBP-box gene, a member of the SPL gene family. Mutants are affected in micro- and megasporogenesis, trichome formation on sepals, and stamen filament elongation.	squamosa promoter binding protein-like 8 (SPL8); CONTAINS InterPro DOMAIN/s: Transcription factor, SBP-box (InterPro:IPR004333); BEST Arabidopsis thaliana protein match is: squamosa promoter binding protein-like 2 (TAIR:AT5G43270.1); Has 903 Blast hits to 889 proteins in 57 species: Archae - 0; Bacteria - 2; Metazoa - 44; Fungi - 4; Plants - 841; Viruses - 0; Other Eukaryotes - 12 (source: NCBI B…	SPL8	squamosa promoter binding protein-like 8	development.squamosa promoter binding like (SPL)				101.76	12.163	45	57.1231	46	54.9171	9	11	4	61.8902	43	26.0405	28	17	21	18.0912	27.444	2.69091	0.339364	1.02402	2.11712	1.70514	1.54558	0.281869	0.32217	0.141668	1.84464	1.49151	0.798222	1.14673	0.609297	0.736508	0.496159	0.854204	1.35143	1.78928	0.248569	1.37812	0.830845	0.675181	1.20948
AT1G02065.2	Encodes an SBP-box gene, a member of the SPL gene family. Mutants are affected in micro- and megasporogenesis, trichome formation on sepals, and stamen filament elongation.	squamosa promoter binding protein-like 8 (SPL8); CONTAINS InterPro DOMAIN/s: Transcription factor, SBP-box (InterPro:IPR004333); BEST Arabidopsis thaliana protein match is: squamosa promoter binding protein-like 2 (TAIR:AT5G43270.1); Has 35333 Blast hits to 34131 proteins in 2444 species: Archae - 798; Bacteria - 22429; Metazoa - 974; Fungi - 991; Plants - 531; Viruses - 0; Other Eukaryotes - 961…	SPL8	squamosa promoter binding protein-like 8	development.squamosa promoter binding like (SPL)				19.2399	18.837	0	6.87686	0	18.0829	0	0	0	8.10979	0	19.9595	0	0	0	29.9088	24.556	0.495518	0.511861	0	0.248229	0	0.49562	0	0	0	0.235338	0	0.595842	0	0	0	0.798876	0.74429	0.335793	0.24795	0	0.27706	0	0.771583	0.29092
AT1G02070.1		unknown protein; BEST Arabidopsis thaliana protein match is: unknown protein (TAIR:AT3G60520.1); Has 98 Blast hits to 98 proteins in 13 species: Archae - 0; Bacteria - 0; Metazoa - 0; Fungi - 0; Plants - 98; Viruses - 0; Other Eukaryotes - 0 (source: NCBI BLink).	AT1G02070	zinc ion-binding protein	not assigned.unknown				11	2	3	3	3	5	0	0	0	5	6	7	2	1	4	6	9	0.936218	0.18041	0.21964	0.358334	0.36056	0.456256	0	0	0	0.493569	0.677709	0.69439	0.266717	0.115601	0.453587	0.530505	0.913442	0.445423	0.391717	0	0.621889	0.278635	0.721974	0.425494
AT1G02074.1		unknown protein; Has 30201 Blast hits to 17322 proteins in 780 species: Archae - 12; Bacteria - 1396; Metazoa - 17338; Fungi - 3422; Plants - 5037; Viruses - 0; Other Eukaryotes - 2996 (source: NCBI BLink).			not assigned.unknown				0	1	0	0	0	0	0	0	0	0	0	0	0	0	0	0	0	0	1.69119	0	0	0	0	0	0	0	0	0	0	0	0	0	0	0	0.56373	0	0	0	0	0	0.976409
AT1G02080.1		transcription regulators; FUNCTIONS IN: transcription regulator activity; LOCATED IN: membrane; EXPRESSED IN: 25 plant structures; EXPRESSED DURING: 15 growth stages; CONTAINS InterPro DOMAIN/s: CCR4-Not complex component, Not1 (InterPro:IPR007196); Has 1434 Blast hits to 680 proteins in 246 species: Archae - 0; Bacteria - 196; Metazoa - 419; Fungi - 362; Plants - 144; Viruses - 0; Other Eukaryot…	AT1G02080	transcription regulator	RNA.regulation of transcription.putative transcription regulator				120.44	300.277	75.9647	375.711	269.618	251.062	334.475	377.737	710.378	539.779	418.01	406.093	77.4869	162.325	566.265	858.172	269.61	0.635229	1.66836	0.344832	2.776	1.98813	1.40554	2.09071	2.20076	5.00741	3.17649	2.87983	2.47792	0.630281	1.15941	3.95462	4.69144	1.66596	0.882807	2.05656	3.09963	2.84475	1.91477	3.1787	0.695631
AT1G02080.2		transcription regulators; FUNCTIONS IN: transcription regulator activity; EXPRESSED IN: 25 plant structures; EXPRESSED DURING: 15 growth stages; CONTAINS InterPro DOMAIN/s: CCR4-Not complex component, Not1 (InterPro:IPR007196).	AT1G02080	transcription regulator	RNA.regulation of transcription.putative transcription regulator				3075.56	2805.72	3140.04	2364.29	2438.38	3761.94	2213.53	1389.26	1086.62	3381.22	2893.99	2949.91	1711.51	2200.67	1495.74	2803.83	2792.39	16.155	15.525	14.1955	17.3975	17.9067	20.9745	13.7796	8.06099	7.6282	19.8163	19.8562	17.9263	13.8645	15.6542	10.403	15.2653	17.184	15.2918	18.7596	9.82293	19.1996	13.3072	16.2247	1.00034
AT1G02090.1	encodes a phosphoprotein that is a subunit of the COP9 signalosome. Mutants exhibit constitutive photomorphogenic phenotype.	FUSCA 5 (FUS5); CONTAINS InterPro DOMAIN/s: Proteasome component (PCI) domain (InterPro:IPR000717); Has 689 Blast hits to 689 proteins in 163 species: Archae - 0; Bacteria - 0; Metazoa - 405; Fungi - 166; Plants - 80; Viruses - 0; Other Eukaryotes - 38 (source: NCBI BLink).	FUS5	Proteasome component (PCI) domain protein	signalling.light.COP9 signalosome				656.902	560.623	628.724	583.379	491.005	569.677	429.716	386.103	398.304	586.191	495.037	552.701	301.074	458.156	437.241	643.754	558.111	27.7402	25.0096	22.8454	34.5402	29.1227	25.6547	21.4813	18.0943	22.5636	28.1141	27.5069	27.0949	19.7533	26.2394	24.5188	28.2069	27.838	25.1984	29.7725	20.7131	27.572	23.5038	28.0224	2.45286
AT1G02090.1	encodes a phosphoprotein that is a subunit of the COP9 signalosome. Mutants exhibit constitutive photomorphogenic phenotype.	FUSCA 5 (FUS5); CONTAINS InterPro DOMAIN/s: Proteasome component (PCI) domain (InterPro:IPR000717); Has 689 Blast hits to 689 proteins in 163 species: Archae - 0; Bacteria - 0; Metazoa - 405; Fungi - 166; Plants - 80; Viruses - 0; Other Eukaryotes - 38 (source: NCBI BLink).	FUS5	Proteasome component (PCI) domain protein	development.unspecified				656.902	560.623	628.724	583.379	491.005	569.677	429.716	386.103	398.304	586.191	495.037	552.701	301.074	458.156	437.241	643.754	558.111	27.7402	25.0096	22.8454	34.5402	29.1227	25.6547	21.4813	18.0943	22.5636	28.1141	27.5069	27.0949	19.7533	26.2394	24.5188	28.2069	27.838	25.1984	29.7725	20.7131	27.572	23.5038	28.0224	2.45286
AT1G02090.2	encodes a phosphoprotein that is a subunit of the COP9 signalosome. Mutants exhibit constitutive photomorphogenic phenotype.	FUSCA 5 (FUS5); CONTAINS InterPro DOMAIN/s: Proteasome component (PCI) domain (InterPro:IPR000717); Has 683 Blast hits to 683 proteins in 162 species: Archae - 0; Bacteria - 0; Metazoa - 406; Fungi - 161; Plants - 78; Viruses - 0; Other Eukaryotes - 38 (source: NCBI BLink).	FUS5	Proteasome component (PCI) domain protein	signalling.light.COP9 signalosome				63.0502	134.557	212.403	92.517	103.017	215.42	165.551	184.312	114.77	185.523	138.673	154.424	77.0965	113.708	97.863	168.127	165.104	2.71609	6.12377	7.87309	5.58794	6.23374	9.89738	8.44201	8.8122	6.63295	9.08052	7.86171	7.72317	5.16086	6.64345	5.59851	7.51501	8.40243	5.57098	7.23969	7.96239	8.2218	5.80094	7.95872	2.62256
AT1G02090.2	encodes a phosphoprotein that is a subunit of the COP9 signalosome. Mutants exhibit constitutive photomorphogenic phenotype.	FUSCA 5 (FUS5); CONTAINS InterPro DOMAIN/s: Proteasome component (PCI) domain (InterPro:IPR000717); Has 683 Blast hits to 683 proteins in 162 species: Archae - 0; Bacteria - 0; Metazoa - 406; Fungi - 161; Plants - 78; Viruses - 0; Other Eukaryotes - 38 (source: NCBI BLink).	FUS5	Proteasome component (PCI) domain protein	development.unspecified				63.0502	134.557	212.403	92.517	103.017	215.42	165.551	184.312	114.77	185.523	138.673	154.424	77.0965	113.708	97.863	168.127	165.104	2.71609	6.12377	7.87309	5.58794	6.23374	9.89738	8.44201	8.8122	6.63295	9.08052	7.86171	7.72317	5.16086	6.64345	5.59851	7.51501	8.40243	5.57098	7.23969	7.96239	8.2218	5.80094	7.95872	2.62256
AT1G02090.3	encodes a phosphoprotein that is a subunit of the COP9 signalosome. Mutants exhibit constitutive photomorphogenic phenotype.	FUSCA 5 (FUS5); CONTAINS InterPro DOMAIN/s: Proteasome component (PCI) domain (InterPro:IPR000717); Has 35333 Blast hits to 34131 proteins in 2444 species: Archae - 798; Bacteria - 22429; Metazoa - 974; Fungi - 991; Plants - 531; Viruses - 0; Other Eukaryotes - 9610 (source: NCBI BLink).	FUS5	Proteasome component (PCI) domain protein	signalling.light.COP9 signalosome				113.048	105.82	111.873	60.1042	68.9777	85.9031	98.7333	101.585	64.9258	100.286	95.2899	133.875	61.8294	73.1365	103.896	116.119	92.7852	2.89798	2.86204	2.46793	2.15943	2.47843	2.34346	2.9977	2.88396	2.22897	2.89649	3.20365	3.97786	2.45436	2.54103	3.53215	3.08714	2.79914	2.74265	2.32711	2.70354	3.35933	2.84251	2.94314	0.238592
AT1G02090.3	encodes a phosphoprotein that is a subunit of the COP9 signalosome. Mutants exhibit constitutive photomorphogenic phenotype.	FUSCA 5 (FUS5); CONTAINS InterPro DOMAIN/s: Proteasome component (PCI) domain (InterPro:IPR000717); Has 35333 Blast hits to 34131 proteins in 2444 species: Archae - 798; Bacteria - 22429; Metazoa - 974; Fungi - 991; Plants - 531; Viruses - 0; Other Eukaryotes - 9610 (source: NCBI BLink).	FUS5	Proteasome component (PCI) domain protein	development.unspecified				113.048	105.82	111.873	60.1042	68.9777	85.9031	98.7333	101.585	64.9258	100.286	95.2899	133.875	61.8294	73.1365	103.896	116.119	92.7852	2.89798	2.86204	2.46793	2.15943	2.47843	2.34346	2.9977	2.88396	2.22897	2.89649	3.20365	3.97786	2.45436	2.54103	3.53215	3.08714	2.79914	2.74265	2.32711	2.70354	3.35933	2.84251	2.94314	0.238592
AT1G02100.1		Leucine carboxyl methyltransferase; FUNCTIONS IN: methyltransferase activity; INVOLVED IN: biological_process unknown; LOCATED IN: cellular_component unknown; EXPRESSED IN: 22 plant structures; EXPRESSED DURING: 14 growth stages; CONTAINS InterPro DOMAIN/s: Leucine carboxyl methyltransferase, LCTM1 1 (InterPro:IPR016651), Leucine carboxyl methyltransferase, eukaryotic (InterPro:IPR021121), Leucin…	SBI1	Leucine carboxyl methyltransferase	not assigned.no ontology				354.391	322.142	341.39	253.058	250.846	354.586	236.987	239.858	168.812	362.995	407.045	361.292	190	244.822	297.128	410.484	426.395	10.6746	10.241	8.84881	10.6841	10.5964	11.3725	8.4533	8.00561	6.8128	12.3455	16.094	12.6191	8.87003	9.99635	11.8733	12.8246	15.1296	9.92147	10.8843	7.75724	13.6862	10.2466	13.9771	0.953914
AT1G02100.2		Leucine carboxyl methyltransferase; FUNCTIONS IN: methyltransferase activity; INVOLVED IN: biological_process unknown; LOCATED IN: cellular_component unknown; EXPRESSED IN: 22 plant structures; EXPRESSED DURING: 14 growth stages; CONTAINS InterPro DOMAIN/s: Leucine carboxyl methyltransferase, LCTM1 1 (InterPro:IPR016651), Leucine carboxyl methyltransferase, eukaryotic (InterPro:IPR021121), Leucin…	SBI1	Leucine carboxyl methyltransferase	not assigned.no ontology				47.5629	7.47175	21.1358	34.6308	25.5535	79.5809	27.425	13.1883	11.4878	87.7824	34.6105	49.8283	28.4698	28.0498	78.1673	31.9055	55.3321	1.56067	0.258809	0.596783	1.59286	1.1763	2.78139	1.06558	0.479676	0.505183	3.25648	1.49153	1.89638	1.44865	1.24779	3.40344	1.08597	2.14004	0.805421	1.85018	0.68348	2.2148	2.03329	1.61301	0.675543
AT1G02100.3		Leucine carboxyl methyltransferase; FUNCTIONS IN: methyltransferase activity; INVOLVED IN: biological_process unknown; LOCATED IN: cellular_component unknown; EXPRESSED IN: 22 plant structures; EXPRESSED DURING: 14 growth stages; CONTAINS InterPro DOMAIN/s: Leucine carboxyl methyltransferase, LCTM1 1 (InterPro:IPR016651), Leucine carboxyl methyltransferase, eukaryotic (InterPro:IPR021121), Leucin…	SBI1	Leucine carboxyl methyltransferase	not assigned.no ontology				292.046	470.386	390.474	338.311	329.6	451.833	315.588	238.954	325.7	491.222	373.344	415.879	195.53	267.128	181.705	510.611	393.273	9.50997	16.1692	10.9415	15.4424	15.0566	15.6713	12.1688	8.62471	14.2136	18.0823	15.9661	15.707	9.87313	11.7927	7.85122	17.2474	15.0939	12.2069	15.3901	11.669	16.5851	9.83902	16.1706	3.50532
AT1G02110.1		Protein of unknown function (DUF630 and DUF632); FUNCTIONS IN: molecular_function unknown; INVOLVED IN: N-terminal protein myristoylation; LOCATED IN: plasma membrane; EXPRESSED IN: 22 plant structures; EXPRESSED DURING: 14 growth stages; CONTAINS InterPro DOMAIN/s: Protein of unknown function DUF630 (InterPro:IPR006868), Protein of unknown function DUF632 (InterPro:IPR006867); BEST Arabidopsis t…	AT1G02110	bZIP domain class transcription factor (DUF630 and DUF632)	not assigned.no ontology.proline rich family				843	580	904	647	597	772	428	319	328	540	503	516	388	413	457	749	616	15.0262	10.9011	13.8672	16.1605	14.9008	14.6294	9.03786	6.29095	7.82363	10.8041	11.7405	10.6531	10.6927	9.97428	10.7965	13.843	12.8994	13.2648	15.2302	7.71748	11.0659	10.4878	13.3712	2.1275
AT1G02120.1	Encodes VAD1 (Vascular Associated Death1), a regulator of cell death and defense responses in vascular tissues. VAD1 is a putative membrane associated protein and contains a GRAM domain. vad1 is a lesion mimic mutant that exhibits light conditional appearance of propagative HR (hypersensitive response)-like lesions along the vascular system.	VASCULAR ASSOCIATED DEATH1 (VAD1); INVOLVED IN: defense response to bacterium, negative regulation of programmed cell death; LOCATED IN: chloroplast; EXPRESSED IN: 24 plant structures; EXPRESSED DURING: 14 growth stages; CONTAINS InterPro DOMAIN/s: GRAM (InterPro:IPR004182); BEST Arabidopsis thaliana protein match is: C2 domain-containing protein / GRAM domain-containing protein (TAIR:AT3G59660.1…	VAD1	GRAM domain family protein	stress.biotic				2321	2727	2431	1864	1859	2899	1696	1535	1544	3038	2522	2557	1434	1854	1674	2874	2529	49.0871	60.8286	44.2453	55.2456	55.0762	65.2096	42.4886	35.9322	43.7117	72.2344	69.8905	62.6559	46.9205	53.1335	46.936	63.0297	62.882	51.387	58.5105	40.7108	68.2603	48.9967	62.9558	8.52752
AT1G02130.1	Belongs to the Rab1 GTPase subfamily. This small GTP-binding protein is required in ER to Golgi transportation.	RAS 5 (RA-5); FUNCTIONS IN: GTP binding; INVOLVED IN: response to cadmium ion, ER to Golgi vesicle-mediated transport; LOCATED IN: plasma membrane, vacuole; EXPRESSED IN: 24 plant structures; EXPRESSED DURING: 13 growth stages; CONTAINS InterPro DOMAIN/s: Ras GTPase (InterPro:IPR001806), Small GTP-binding protein (InterPro:IPR005225), Small GTPase (InterPro:IPR020851), Ras (InterPro:IPR013753), R…	RA-5	RAS 5	signalling.G-proteins				772	797	962	667	706	886	601	601	527	838	772	910	474	662	650	906	803	34.212	37.3177	36.6826	41.445	43.9557	41.8832	31.5265	29.565	31.3363	42.2203	45.0353	46.8247	32.6496	39.7912	38.2572	41.6621	42.052	36.0708	42.428	30.8093	44.6934	36.8993	41.8571	1.64076
AT1G02136.1	pseudogene of phagocytosis and cell motility protein		AT1G02136	pseudogene of ELMO/CED-12 family protein	not assigned.unknown				0	0	0	0	0	0	0	2	0	0	0	1	0	0	0	0	1	0	0	0	0	0	0	0	1.63616	0	0	0	0.858275	0	0	0	0	0.891981	0	0	0.545387	0.286092	0	0.445991	0
AT1G02140.1	Encodes a homologue of the exon junction complex (EJC) component MAGO that participates in intron-mediated enhancement of gene expression.	MAGO NASHI (MAGO); FUNCTIONS IN: protein binding; INVOLVED IN: pollen tube guidance, sex determination, embryo development ending in seed dormancy; LOCATED IN: in 6 components; EXPRESSED IN: 25 plant structures; EXPRESSED DURING: 15 growth stages; CONTAINS InterPro DOMAIN/s: Mago nashi protein (InterPro:IPR004023); Has 476 Blast hits to 476 proteins in 200 species: Archae - 0; Bacteria - 0; Metaz…	MAGO	mago nashi family protein	development.unspecified				2167	2196	2632	1820	1813	2256	1735	1886	1527	2222	2004	2265	1204	1635	1934	2511	2102	131.78	141.275	137.706	155.242	155.216	146.651	124.827	127.577	124.805	154.86	160.949	160.176	114.168	134.947	156.402	158.523	151.609	136.92	152.37	125.736	158.662	135.172	155.066	4.79601
AT1G02145.1		homolog of asparagine-linked glycosylation 12 (ALG12); FUNCTIONS IN: alpha-1,6-mannosyltransferase activity; INVOLVED IN: ER-associated protein catabolic process, protein amino acid terminal N-glycosylation; LOCATED IN: endomembrane system, intrinsic to endoplasmic reticulum membrane; CONTAINS InterPro DOMAIN/s: Alg9-like mannosyltransferase (InterPro:IPR005599); BEST Arabidopsis thaliana protein…	ALG12	homolog of asparagine-linked glycosylation 12	not assigned.no ontology				0	0	0	0	0	15.2964	0	0	0	0	0	0	0	15.085	0	16.6311	0	0	0	0	0	0	0.420658	0	0	0	0	0	0	0	0.528328	0	0.445713	0	0	0.140219	0	0	0.176109	0.222857	0
AT1G02145.2		homolog of asparagine-linked glycosylation 12 (ALG12); FUNCTIONS IN: alpha-1,6-mannosyltransferase activity; INVOLVED IN: ER-associated protein catabolic process, protein amino acid terminal N-glycosylation; LOCATED IN: intrinsic to endoplasmic reticulum membrane; CONTAINS InterPro DOMAIN/s: Alg9-like mannosyltransferase (InterPro:IPR005599); Has 30201 Blast hits to 17322 proteins in 780 species:…	ALG12	homolog of asparagine-linked glycosylation 12	not assigned.no ontology				0	0	0	0	0	0	0	0	0	0	0	0	0	0	0	0	0	0	0	0	0	0	0	0	0	0	0	0	0	0	0	0	0	0	0	0	0	0	0	0	0
AT1G02145.3		homolog of asparagine-linked glycosylation 12 (ALG12); FUNCTIONS IN: alpha-1,6-mannosyltransferase activity; INVOLVED IN: ER-associated protein catabolic process, protein amino acid terminal N-glycosylation; LOCATED IN: endomembrane system, intrinsic to endoplasmic reticulum membrane; CONTAINS InterPro DOMAIN/s: Alg9-like mannosyltransferase (InterPro:IPR005599); Has 793 Blast hits to 783 protein…	ALG12	homolog of asparagine-linked glycosylation 12	not assigned.no ontology				461.871	513.864	622.041	373.492	402.981	580.158	333.117	387.686	353.734	528.524	457.78	538.724	283.009	318.898	417.46	611.859	533.727	11.84	13.8982	13.7223	13.4189	14.4794	15.8269	10.114	11.0062	12.144	15.2649	15.3906	16.0073	11.2342	11.0797	14.1924	16.2669	16.1015	13.1535	14.5751	11.0881	15.5543	12.1688	16.1842	1.14092
AT1G02145.4		homolog of asparagine-linked glycosylation 12 (ALG12); FUNCTIONS IN: alpha-1,6-mannosyltransferase activity; INVOLVED IN: ER-associated protein catabolic process, protein amino acid terminal N-glycosylation; LOCATED IN: intrinsic to endoplasmic reticulum membrane; CONTAINS InterPro DOMAIN/s: Alg9-like mannosyltransferase (InterPro:IPR005599); BEST Arabidopsis thaliana protein match is: Alg9-like …	ALG12	homolog of asparagine-linked glycosylation 12	not assigned.no ontology				57.1287	16.1356	15.9585	20.5077	37.0191	38.5461	16.8831	17.3143	28.2658	47.476	36.2199	15.2763	7.99072	57.0173	30.5402	27.5096	20.273	1.40025	0.417232	0.336608	0.704466	1.2716	1.00528	0.490131	0.469918	0.927721	1.31036	1.16404	0.433953	0.303214	1.89401	0.992644	0.699267	0.584624	0.71803	0.993782	0.629257	0.969451	1.06329	0.641945	0.592194
AT1G02150.1		Tetratricopeptide repeat (TPR)-like superfamily protein; FUNCTIONS IN: binding; LOCATED IN: chloroplast; EXPRESSED IN: 22 plant structures; EXPRESSED DURING: 13 growth stages; CONTAINS InterPro DOMAIN/s: Pentatricopeptide repeat (InterPro:IPR002885), Tetratricopeptide-like helical (InterPro:IPR011990); BEST Arabidopsis thaliana protein match is: Pentatricopeptide repeat (PPR) superfamily protein …	AT1G02150	Tetratricopeptide repeat (TPR)-like superfamily protein	RNA.regulation of transcription.putative transcription regulator				2544	2376	3709	2383	2350	2837	1518	1855	1705	2394	1955	2496	1398	1798	2311	3112	2055	55.761	54.9307	69.9613	73.1988	72.1631	66.1433	39.412	45.0072	50.0299	59.0149	56.1574	63.3911	47.4142	53.4051	67.1579	70.7341	52.9644	60.2177	70.5017	44.8164	59.5211	55.9924	61.8492	8.44844
AT1G02160.1		Cox19 family protein (CHCH motif); CONTAINS InterPro DOMAIN/s: CHCH (InterPro:IPR010625); Has 56 Blast hits to 56 proteins in 33 species: Archae - 0; Bacteria - 0; Metazoa - 3; Fungi - 34; Plants - 19; Viruses - 0; Other Eukaryotes - 0 (source: NCBI BLink).	AT1G02160	Cox19 family protein (CHCH motif)	not assigned.unknown				294.807	294.823	349.119	289.008	270.076	380.262	241.472	229.121	196.075	286.574	250.856	309.144	170.381	258.526	204.902	373.442	306.87	34.0107	36.1501	34.6566	46.8468	44.1746	47.2382	32.9218	29.6193	30.5782	38.9137	38.6604	41.7065	30.9986	40.5801	31.5884	44.8166	42.5259	34.9391	46.0865	31.0398	39.7602	34.389	43.6713	1.09733
AT1G02160.2		Cox19 family protein (CHCH motif); FUNCTIONS IN: molecular_function unknown; INVOLVED IN: biological_process unknown; LOCATED IN: cellular_component unknown; EXPRESSED IN: 24 plant structures; EXPRESSED DURING: 14 growth stages; CONTAINS InterPro DOMAIN/s: MTCP1 (InterPro:IPR009069), CHCH (InterPro:IPR010625); Has 36 Blast hits to 36 proteins in 21 species: Archae - 0; Bacteria - 0; Metazoa - 2; …	AT1G02160	Cox19 family protein (CHCH motif)	not assigned.unknown				34.1933	57.1767	55.8811	29.9922	31.9239	26.7383	32.5281	17.8793	20.9253	39.4263	37.1442	47.856	36.6193	23.4741	31.098	49.5583	37.1297	3.16871	5.61961	4.45491	3.9017	4.18206	2.65946	3.56316	1.85045	2.61466	4.25355	4.57559	5.17313	5.3254	2.95584	3.84233	4.77259	4.11056	4.41441	3.58107	2.67609	4.66742	4.04119	4.44158	1.22595
AT1G02170.1	Encodes a type I metacaspase. Two Arabidopsis metacaspases, AT1G02170 (MC1) and AT4G25110 (MC2) antagonistically control programmed cell death in Arabidopsis. MC1 is a positive regulator of cell death and requires conserved caspase-like putative catalytic residues for its function. MC2 negatively regulates cell death. This function is independent of the putative catalytic residues. A third type I…	metacaspase 1 (AMC1); FUNCTIONS IN: cysteine-type endopeptidase activity; INVOLVED IN: proteolysis, induction of apoptosis; LOCATED IN: chloroplast; EXPRESSED IN: 23 plant structures; EXPRESSED DURING: 15 growth stages; CONTAINS InterPro DOMAIN/s: Zinc finger, LSD1-type (InterPro:IPR005735), Peptidase C14, caspase catalytic (InterPro:IPR011600); BEST Arabidopsis thaliana protein match is: metacas…	MC1	metacaspase 1	protein.degradation				770	818	803	716	636	957	635	659	521	985	871	1016	416	604	590	1037	805	25.0526	28.0945	22.482	32.6546	29.0287	33.1642	24.4644	23.7656	22.7173	36.2276	37.2168	38.3401	20.9878	26.6417	25.4715	34.9983	30.8698	25.2097	31.6158	23.6491	37.2615	24.367	32.934	2.80955
AT1G02180.1		ferredoxin-related; FUNCTIONS IN: molecular_function unknown; INVOLVED IN: biological_process unknown; LOCATED IN: endomembrane system; EXPRESSED IN: 23 plant structures; EXPRESSED DURING: 15 growth stages; Has 54 Blast hits to 54 proteins in 11 species: Archae - 0; Bacteria - 0; Metazoa - 0; Fungi - 0; Plants - 54; Viruses - 0; Other Eukaryotes - 0 (source: NCBI BLink).	AT1G02180	ferredoxin-like protein	PS.lightreaction.other electron carrier (ox/red).ferredoxin				164	96	206	104	109	142	61	51	35	66	60	63	82	88	76	120	68	8.24383	5.10092	8.90961	7.33097	7.70344	7.61985	3.6289	2.84788	2.36206	3.78269	3.97489	3.67907	6.41376	6.00121	5.07619	6.26024	4.04461	7.41812	7.55142	2.94628	3.81222	5.83039	5.15243	2.03418
AT1G02190.1		Fatty acid hydroxylase superfamily; FUNCTIONS IN: oxidoreductase activity, iron ion binding, catalytic activity; INVOLVED IN: oxidation reduction, fatty acid biosynthetic process; LOCATED IN: endoplasmic reticulum; EXPRESSED IN: 12 plant structures; EXPRESSED DURING: 6 growth stages; CONTAINS InterPro DOMAIN/s: Fatty acid hydroxylase (InterPro:IPR006694), Uncharacterised protein, Wax2 C-terminal …	AT1G02190	Fatty acid hydroxylase superfamily	secondary metabolism.wax				0.014949	0.00667774	0.00486906	0.0061907	0.0148319	0.00257112	0.0117616	0.0131387	0.00860979	0.00759066	0.00747107	0.00609711	0.00513006	0.00595327	0.00739598	0.00586415	0.00295267	0.000285042	0.000134273	7.98985e-05	0.000165416	0.000396071	5.21287e-05	0.000265673	0.000277218	0.000219714	0.000162558	0.000186588	0.000134672	0.000151273	0.00015381	0.000186931	0.000115943	6.61606e-05	0.000166404	0.000204539	0.000254202	0.000161273	0.000164005	9.10518e-05	0.000106279
AT1G02190.2		Fatty acid hydroxylase superfamily; FUNCTIONS IN: oxidoreductase activity, iron ion binding, catalytic activity; INVOLVED IN: oxidation reduction, fatty acid biosynthetic process; LOCATED IN: endoplasmic reticulum; EXPRESSED IN: 12 plant structures; EXPRESSED DURING: 6 growth stages; CONTAINS InterPro DOMAIN/s: Fatty acid hydroxylase (InterPro:IPR006694), Uncharacterised protein, Wax2 C-terminal …	AT1G02190	Fatty acid hydroxylase superfamily	secondary metabolism.wax				4.98505	1.99332	2.99513	2.99381	4.98517	0.997429	4.98824	5.98686	2.99139	2.99241	2.99253	1.9939	1.99487	1.99405	2.9926	2.99414	0.997047	0.0956208	0.0403205	0.0494418	0.0804725	0.133921	0.0203436	0.113347	0.127075	0.0767941	0.0644701	0.0751853	0.0443044	0.0591763	0.0518264	0.0760894	0.059552	0.0224748	0.0617944	0.0782457	0.105739	0.0613199	0.062364	0.0410134	0.0296474
AT1G02205.1	Expression of the CER1 gene associated with production of stem epicuticular wax and pollen fertility. Biochemical studies showed that cer1 mutants are blocked in the conversion of stem wax C30 aldehydes to C29 alkanes, and they also lack the secondary alcohols and ketones. These suggested the CER1 protein is an aldehyde decarbonylase, but the exact molecular function of this protein remains to be…	ECERIFERUM 1 (CER1); FUNCTIONS IN: aldehyde decarbonylase activity; INVOLVED IN: aldehyde catabolic process, wax biosynthetic process, cuticle development; LOCATED IN: endomembrane system, endoplasmic reticulum; EXPRESSED IN: 18 plant structures; EXPRESSED DURING: 13 growth stages; CONTAINS InterPro DOMAIN/s: Fatty acid hydroxylase (InterPro:IPR006694), Uncharacterised protein, Wax2 C-terminal (I…	CER1	Fatty acid hydroxylase superfamily	secondary metabolism.wax				121.508	34.8692	179.868	51.4144	53.4055	47.9405	31.2062	8.21005	43.634	81.5053	16.3086	56.5169	38.5135	50.3079	27.7655	43.1061	20.3543	2.12363	0.642576	2.70537	1.25916	1.30693	0.890728	0.646127	0.158746	1.02046	1.59867	0.373213	1.14405	1.04061	1.19128	0.643151	0.781148	0.417892	1.82386	1.15227	0.608444	1.03864	0.958347	0.59952	1.06357
AT1G02205.2	Expression of the CER1 gene associated with production of stem epicuticular wax and pollen fertility. Biochemical studies showed that cer1 mutants are blocked in the conversion of stem wax C30 aldehydes to C29 alkanes, and they also lack the secondary alcohols and ketones. These suggested the CER1 protein is an aldehyde decarbonylase, but the exact molecular function of this protein remains to be…	ECERIFERUM 1 (CER1); FUNCTIONS IN: aldehyde decarbonylase activity; INVOLVED IN: aldehyde catabolic process, wax biosynthetic process, cuticle development; LOCATED IN: endoplasmic reticulum; EXPRESSED IN: 18 plant structures; EXPRESSED DURING: 13 growth stages; CONTAINS InterPro DOMAIN/s: Fatty acid hydroxylase (InterPro:IPR006694), Uncharacterised protein, Wax2 C-terminal (InterPro:IPR021940); B…	CER1	Fatty acid hydroxylase superfamily	secondary metabolism.wax				3677.75	976.248	3349.74	1319.27	735.983	1504.36	1010.81	986.853	1257.59	1518.15	948.691	985.483	854.229	1714.3	1188.66	1327.26	924.646	68.7657	19.2486	53.9012	34.5668	19.2716	29.9074	22.3896	20.417	31.4689	31.8757	23.2319	21.3442	24.6987	43.4313	29.4594	25.7325	20.315	47.3052	27.9153	24.7585	25.4839	32.5298	23.0237	25.409
AT1G02205.3	Expression of the CER1 gene associated with production of stem epicuticular wax and pollen fertility. Biochemical studies showed that cer1 mutants are blocked in the conversion of stem wax C30 aldehydes to C29 alkanes, and they also lack the secondary alcohols and ketones. These suggested the CER1 protein is an aldehyde decarbonylase, but the exact molecular function of this protein remains to be…	ECERIFERUM 1 (CER1); FUNCTIONS IN: aldehyde decarbonylase activity; INVOLVED IN: aldehyde catabolic process, wax biosynthetic process, cuticle development; LOCATED IN: endoplasmic reticulum; EXPRESSED IN: 18 plant structures; EXPRESSED DURING: 13 growth stages; CONTAINS InterPro DOMAIN/s: Fatty acid hydroxylase (InterPro:IPR006694), Uncharacterised protein, Wax2 C-terminal (InterPro:IPR021940); B…	CER1	Fatty acid hydroxylase superfamily	secondary metabolism.wax				91.7455	44.8825	115.388	12.3172	43.6111	13.7	12.9878	37.9373	31.7732	83.3413	0	0	16.2574	65.3876	35.572	17.6336	0	1.84615	0.952481	1.99819	0.347333	1.22919	0.29317	0.30959	0.844846	0.855771	1.88449	0	0	0.50602	1.7829	0.948888	0.367942	0	1.59894	0.623231	0.670069	0.628163	1.07927	0.183971	0.564988
AT1G02210.1		NAC (No Apical Meristem) domain transcriptional regulator superfamily protein; FUNCTIONS IN: DNA binding; INVOLVED IN: regulation of transcription; LOCATED IN: cellular_component unknown; CONTAINS InterPro DOMAIN/s: No apical meristem (NAM) protein (InterPro:IPR003441); BEST Arabidopsis thaliana protein match is: NAC domain containing protein 4 (TAIR:AT1G02230.1); Has 519 Blast hits to 519 protei…	AT1G02210	NAC (No Apical Meristem) domain transcriptional regulator superfamily protein	RNA.regulation of transcription.NAC domain transcription factor family				0	0	0	0	0	0	0	0	0	0	0	0	0	0	0	0	0	0	0	0	0	0	0	0	0	0	0	0	0	0	0	0	0	0	0	0	0	0	0	0	0
AT1G02220.1		NAC domain containing protein 3 (NAC003); FUNCTIONS IN: sequence-specific DNA binding transcription factor activity; INVOLVED IN: multicellular organismal development, regulation of transcription; LOCATED IN: cellular_component unknown; EXPRESSED IN: 17 plant structures; EXPRESSED DURING: LP.06 six leaves visible, LP.04 four leaves visible, 4 anthesis, 4 leaf senescence stage, petal differentiati…	NAC003	NAC domain containing protein 3	development.unspecified				263	509	235	77	104	93	442	427	380	731	494	435	181	425	377	249	238	8.43589	17.2339	6.48637	3.46204	4.67944	3.17709	16.7882	15.1803	16.3341	26.4995	20.8076	16.1824	9.00171	18.4808	16.0451	8.28467	8.99674	10.7187	3.77286	16.1009	21.1632	14.5092	8.64071	5.72589
AT1G02228.1	pseudogene of no apical meristem (NAM) family protein		AT1G02228	transposable_element_gene	not assigned.no ontology				0	0	0	0	0	0	0	0	0	0	0	0	0	0	0	0	0	0	0	0	0	0	0	0	0	0	0	0	0	0	0	0	0	0	0	0	0	0	0	0	0
AT1G02230.1		NAC domain containing protein 4 (NAC004); FUNCTIONS IN: sequence-specific DNA binding transcription factor activity; INVOLVED IN: multicellular organismal development, regulation of transcription; LOCATED IN: cellular_component unknown; CONTAINS InterPro DOMAIN/s: No apical meristem (NAM) protein (InterPro:IPR003441); BEST Arabidopsis thaliana protein match is: NAC domain containing protein 5 (TA…	NAC004	NAC domain containing protein 4	development.unspecified				14	66	11	9	13	23	101	46	65	70	32	22	21	48	57	18	12	0.580397	2.89029	0.392393	0.523115	0.756893	1.01675	4.95676	2.11613	3.6146	3.29465	1.74532	1.05871	1.3524	2.69871	3.13772	0.774259	0.587507	1.28769	0.765586	3.5625	2.03289	2.39628	0.680883	1.39107
AT1G02250.1		NAC domain containing protein 5 (NAC005); FUNCTIONS IN: sequence-specific DNA binding transcription factor activity; INVOLVED IN: multicellular organismal development, regulation of transcription; LOCATED IN: cellular_component unknown; EXPRESSED IN: xylem; CONTAINS InterPro DOMAIN/s: No apical meristem (NAM) protein (InterPro:IPR003441); BEST Arabidopsis thaliana protein match is: NAC domain con…	NAC005	NAC domain containing protein 5	development.unspecified				3	5	5	0	2	3	12	9	8	4	3	3	5	3	6	2	1	0.12331	0.217088	0.17684	0	0.115447	0.131482	0.583906	0.410475	0.441064	0.186628	0.162217	0.143134	0.319231	0.167229	0.32746	0.0852941	0.0485375	0.172413	0.0823097	0.478482	0.163993	0.271307	0.0669158	0.0470455
AT1G02260.1		Divalent ion symporter; FUNCTIONS IN: citrate transmembrane transporter activity, transporter activity; INVOLVED IN: citrate transport, transmembrane transport; LOCATED IN: endomembrane system, integral to membrane; EXPRESSED IN: 24 plant structures; EXPRESSED DURING: 13 growth stages; CONTAINS InterPro DOMAIN/s: Divalent ion symporter (InterPro:IPR004680); Has 9789 Blast hits to 6672 proteins in…	AT1G02260	Divalent ion symporter	not assigned.no ontology				589	589	539	556	503	793	355	343	342	654	672	799	256	439	311	792	633	11.3829	12.0039	8.96437	15.0575	13.6144	16.296	8.12724	7.33524	8.84586	14.1971	17.011	17.8875	7.65137	11.4957	7.96697	15.871	14.3764	10.7837	14.9893	8.10278	16.3652	9.03801	15.1237	1.60591
AT1G02270.1		Calcium-binding endonuclease/exonuclease/phosphatase family; FUNCTIONS IN: catalytic activity, calcium ion binding; INVOLVED IN: response to cold; LOCATED IN: nucleus; EXPRESSED IN: 22 plant structures; EXPRESSED DURING: 13 growth stages; CONTAINS InterPro DOMAIN/s: EF-HAND 2 (InterPro:IPR018249), EF-hand-like domain (InterPro:IPR011992), Endonuclease/exonuclease/phosphatase (InterPro:IPR005135);…	AT1G02270	Calcium-binding endonuclease/exonuclease/phosphatase family	signalling.calcium				470	595	541	337	367	565	483	420	390	556	567	581	262	447	373	543	461	12.129	16.2005	12.0144	12.1889	13.2752	15.5169	14.7627	12.0037	13.4789	16.1673	19.1908	17.3793	10.4702	15.6345	12.7659	14.5329	14.0011	13.448	13.6603	13.4151	17.5791	12.9569	14.267	2.38445
AT1G02280.1	Encodes a GTP-binding GTP-ase. Component of the chloroplast protein import machinery. Required for import of POR B into plastids. Toc33 phosphorylation may not play an important role in vivo.	translocon at the outer envelope membrane of chloroplasts 33 (TOC33); FUNCTIONS IN: protein binding, GTP binding, GTPase activity, protein homodimerization activity; INVOLVED IN: protein targeting to chloroplast; LOCATED IN: chloroplast outer membrane, chloroplast, chloroplast envelope; EXPRESSED IN: 23 plant structures; EXPRESSED DURING: 13 growth stages; CONTAINS InterPro DOMAIN/s: AIG1 (InterP…	TOC33	translocon at the outer envelope membrane of chloroplasts 33	signalling.G-proteins				2004.74	1472.25	2590.33	1243.05	1471.36	1517.77	1013.19	1051.3	925.901	1516.14	1289.57	1171.28	1086.85	1233.76	1599.54	1790.88	1398.39	75.6287	58.6528	84.0866	65.7414	77.9185	61.0263	45.2532	43.9886	46.836	64.8186	63.9557	51.274	63.645	63.1122	80.1017	70.0917	62.2491	72.7894	68.2287	45.3593	60.0161	68.953	66.1704	12.9524
AT1G02280.1	Encodes a GTP-binding GTP-ase. Component of the chloroplast protein import machinery. Required for import of POR B into plastids. Toc33 phosphorylation may not play an important role in vivo.	translocon at the outer envelope membrane of chloroplasts 33 (TOC33); FUNCTIONS IN: protein binding, GTP binding, GTPase activity, protein homodimerization activity; INVOLVED IN: protein targeting to chloroplast; LOCATED IN: chloroplast outer membrane, chloroplast, chloroplast envelope; EXPRESSED IN: 23 plant structures; EXPRESSED DURING: 13 growth stages; CONTAINS InterPro DOMAIN/s: AIG1 (InterP…	TOC33	translocon at the outer envelope membrane of chloroplasts 33	protein.targeting.chloroplast				2004.74	1472.25	2590.33	1243.05	1471.36	1517.77	1013.19	1051.3	925.901	1516.14	1289.57	1171.28	1086.85	1233.76	1599.54	1790.88	1398.39	75.6287	58.6528	84.0866	65.7414	77.9185	61.0263	45.2532	43.9886	46.836	64.8186	63.9557	51.274	63.645	63.1122	80.1017	70.0917	62.2491	72.7894	68.2287	45.3593	60.0161	68.953	66.1704	12.9524
AT1G02280.2	Encodes a GTP-binding GTP-ase. Component of the chloroplast protein import machinery. Required for import of POR B into plastids. Toc33 phosphorylation may not play an important role in vivo.	translocon at the outer envelope membrane of chloroplasts 33 (TOC33); FUNCTIONS IN: protein binding, GTP binding, GTPase activity, protein homodimerization activity; INVOLVED IN: protein targeting to chloroplast; LOCATED IN: chloroplast outer membrane, chloroplast; EXPRESSED IN: 23 plant structures; EXPRESSED DURING: 13 growth stages; CONTAINS InterPro DOMAIN/s: AIG1 (InterPro:IPR006703), Chlorop…	TOC33	translocon at the outer envelope membrane of chloroplasts 33	protein.targeting.chloroplast				329.263	156.749	266.669	239.949	164.637	237.229	155.81	228.697	166.099	209.856	164.434	288.718	119.145	216.24	291.456	293.117	128.61	12.569	6.31911	8.75934	12.8411	8.82271	9.65235	7.04172	9.68339	8.50221	9.08036	8.25266	12.7896	7.06053	11.1932	14.7694	11.6085	5.79366	9.21582	10.4387	8.40911	10.0409	11.0077	8.70108	3.14985
AT1G02280.2	Encodes a GTP-binding GTP-ase. Component of the chloroplast protein import machinery. Required for import of POR B into plastids. Toc33 phosphorylation may not play an important role in vivo.	translocon at the outer envelope membrane of chloroplasts 33 (TOC33); FUNCTIONS IN: protein binding, GTP binding, GTPase activity, protein homodimerization activity; INVOLVED IN: protein targeting to chloroplast; LOCATED IN: chloroplast outer membrane, chloroplast; EXPRESSED IN: 23 plant structures; EXPRESSED DURING: 13 growth stages; CONTAINS InterPro DOMAIN/s: AIG1 (InterPro:IPR006703), Chlorop…	TOC33	translocon at the outer envelope membrane of chloroplasts 33	signalling.G-proteins				329.263	156.749	266.669	239.949	164.637	237.229	155.81	228.697	166.099	209.856	164.434	288.718	119.145	216.24	291.456	293.117	128.61	12.569	6.31911	8.75934	12.8411	8.82271	9.65235	7.04172	9.68339	8.50221	9.08036	8.25266	12.7896	7.06053	11.1932	14.7694	11.6085	5.79366	9.21582	10.4387	8.40911	10.0409	11.0077	8.70108	3.14985
AT1G02290.1		unknown protein; BEST Arabidopsis thaliana protein match is: unknown protein (TAIR:AT3G45830.1); Has 134 Blast hits to 134 proteins in 37 species: Archae - 0; Bacteria - 0; Metazoa - 54; Fungi - 0; Plants - 78; Viruses - 0; Other Eukaryotes - 2 (source: NCBI BLink).	AT1G02290	hypothetical protein	not assigned.unknown				193	217	282	160	169	232	137	111	126	238	181	211	122	144	150	251	214	4.81936	5.71673	6.05982	5.59949	5.9145	6.16454	4.05187	3.06934	4.21336	6.69375	5.92679	6.10671	4.71678	4.87334	4.96718	6.50008	6.28778	5.53197	5.89284	3.77819	6.24242	4.85243	6.39393	0.640537
AT1G02300.1		Cysteine proteinases superfamily protein; FUNCTIONS IN: cysteine-type endopeptidase activity, cysteine-type peptidase activity; INVOLVED IN: proteolysis, regulation of catalytic activity; LOCATED IN: endomembrane system; EXPRESSED IN: 22 plant structures; EXPRESSED DURING: 13 growth stages; CONTAINS InterPro DOMAIN/s: Peptidase C1A, papain (InterPro:IPR013128), Peptidase C1A, cathepsin B (InterPr…	AT1G02300	Cysteine proteinases superfamily protein	protein.degradation.cysteine protease				145	129.067	134	168	191	267	100	101	88	234	203	239	88	126.082	100	245	207	5.1956	4.88311	4.13162	8.43877	9.60483	10.1943	4.24251	4.013	4.2272	9.49328	9.55888	9.93564	4.8927	6.1255	4.75576	9.10711	8.74846	4.73678	9.41263	4.1609	9.6626	5.25799	8.92779	0.546876
AT1G02305.1		Cysteine proteinases superfamily protein; FUNCTIONS IN: cysteine-type endopeptidase activity, cysteine-type peptidase activity; INVOLVED IN: proteolysis, regulation of catalytic activity; LOCATED IN: vacuole; EXPRESSED IN: 23 plant structures; EXPRESSED DURING: 15 growth stages; CONTAINS InterPro DOMAIN/s: Peptidase C1A, papain (InterPro:IPR013128), Peptidase C1A, cathepsin B (InterPro:IPR015643)…	AT1G02305	Cysteine proteinases superfamily protein	protein.degradation.cysteine protease				1867	2112.93	2196	1712	1654	2811	1477	1575	1148	2801	2169	2694	1100	1646.92	1334	2489	2288	57.3105	68.4575	58.0076	73.6624	71.2091	91.8853	53.6903	53.5762	47.2181	97.1091	87.4079	95.8983	52.34	68.532	54.3282	79.2499	82.7459	61.2585	78.9189	51.4949	93.4718	58.4001	80.9979	6.24422
AT1G02310.1		Glycosyl hydrolase superfamily protein; FUNCTIONS IN: cation binding, hydrolase activity, hydrolyzing O-glycosyl compounds, catalytic activity; INVOLVED IN: carbohydrate metabolic process; LOCATED IN: endomembrane system; EXPRESSED IN: 7 plant structures; EXPRESSED DURING: 4 anthesis, petal differentiation and expansion stage, D bilateral stage; CONTAINS InterPro DOMAIN/s: Glycoside hydrolase, ca…	MAN1	Glycosyl hydrolase superfamily protein	misc.gluco-, galacto- and mannosidases				58	19	3	6	6	7	21	11	0	81	113	61	0	6	115	5	44	1.80483	0.624053	0.0803324	0.261707	0.261874	0.231966	0.773832	0.379337	0	2.84733	4.61662	2.2013	0	0.253104	4.74788	0.161387	1.61325	0.836405	0.251849	0.38439	3.22175	1.66699	0.887319	0.881642
AT1G02320.1		unknown protein; Has 0 Blast hits to 0 proteins in 0 species (source: NCBI BLink).	AT1G02320	hypothetical protein	not assigned.unknown				0	0	0	0	0	0	0	0	0	0	0	0	0	0	0	2	0	0	0	0	0	0	0	0	0	0	0	0	0	0	0	0	3.19455	0	0	0	0	0	0	1.59728	0
AT1G02330.1		CONTAINS InterPro DOMAIN/s: Hepatocellular carcinoma-associated antigen 59 (InterPro:IPR010756); Has 1239 Blast hits to 998 proteins in 204 species: Archae - 4; Bacteria - 71; Metazoa - 421; Fungi - 109; Plants - 87; Viruses - 5; Other Eukaryotes - 542 (source: NCBI BLink).	AT1G02330	integrator complex subunit-like protein	not assigned.no ontology				573	642	679	444	453	590	539	458	397	735	516	611	375	470	501	656	548	24.3572	28.8299	24.8354	26.462	27.0472	26.7467	27.1223	21.6064	22.6391	35.4891	28.863	30.1518	24.7676	27.0961	28.2806	28.9338	27.5162	26.0075	26.752	23.7893	31.5013	26.7148	28.225	2.45594
AT1G02335.1	Encodes a plasodesmata-located protein involved in regulating primary root growth by controlling phloem-mediated allocation of resources between the primary and lateral root meristems.	germin-like protein subfamily 2 member 2 precursor (GL22); FUNCTIONS IN: manganese ion binding, nutrient reservoir activity; LOCATED IN: endomembrane system, apoplast; CONTAINS InterPro DOMAIN/s: Cupin, RmlC-type (InterPro:IPR011051), Cupin 1 (InterPro:IPR006045), RmlC-like jelly roll fold (InterPro:IPR014710), Germin (InterPro:IPR001929), Germin, manganese binding site (InterPro:IPR019780); BEST…	GL22	germin-like protein subfamily 2 member 2 precursor	metal handling.binding, chelation and storage				170	42	244	172	93	273	98	114	27	136	93	49	130	46	36	34	174	9.6246	2.5147	11.8853	13.6574	7.40858	16.5127	6.56499	7.17547	2.05359	8.80616	6.9479	3.22477	11.4667	3.53405	2.7095	1.99809	11.6729	8.0082	12.5262	5.26468	6.32628	5.90342	6.83549	4.88995
AT1G02340.1	Encodes a light-inducible, nuclear bHLH protein involved in phytochrome signaling. Mutants exhibit a long-hypocotyl phenotype only under far-red light but not under red light and are defective in other phytochrome A-related responses. Mutants also show blue light response defects. HFR1 interacts with COP1, co-localizes to the nuclear specks and is ubiquinated by COP1.	LONG HYPOCOTYL IN FAR-RED (HFR1); CONTAINS InterPro DOMAIN/s: Helix-loop-helix DNA-binding domain (InterPro:IPR001092), Helix-loop-helix DNA-binding (InterPro:IPR011598); BEST Arabidopsis thaliana protein match is: phytochrome interacting factor 3 (TAIR:AT1G09530.2); Has 1715 Blast hits to 1709 proteins in 90 species: Archae - 0; Bacteria - 0; Metazoa - 4; Fungi - 4; Plants - 1707; Viruses - 0; O…	HFR1	basic helix-loop-helix (bHLH) DNA-binding superfamily protein	signalling.light				58	49	53	37	40	31	21	22	28	44	30	32	33	18	26	51	35	2.02921	1.81001	1.5956	1.81465	1.96382	1.15556	0.86993	0.853405	1.31317	1.74223	1.37908	1.29881	1.79117	0.85384	1.20725	1.85099	1.44404	1.81161	1.64468	1.01217	1.47337	1.28409	1.64752	0.216809
AT1G02350.1		protoporphyrinogen oxidase-related; FUNCTIONS IN: molecular_function unknown; INVOLVED IN: siroheme biosynthetic process; Has 0 Blast hits to 0 proteins in 0 species (source: NCBI BLink).	AT1G02350	protoporphyrinogen oxidase-like protein	tetrapyrrole synthesis.protoporphyrin IX oxidase				57	49	72	24	31	26	35	51	52	41	23	33	46	55	44	50	28	8.06856	7.38935	8.77189	4.77768	6.24504	3.9771	5.85476	8.11646	9.97326	6.90586	4.37194	5.47783	10.3299	10.6047	8.34277	7.36888	4.78674	8.0766	4.99994	7.98149	5.58521	9.75912	6.07781	0.691305
AT1G02360.1		Chitinase family protein; FUNCTIONS IN: chitinase activity; INVOLVED IN: carbohydrate metabolic process, cell wall macromolecule catabolic process; LOCATED IN: endomembrane system; EXPRESSED IN: stem, cotyledon, leaf whorl, root; CONTAINS InterPro DOMAIN/s: Glycoside hydrolase, family 19 (InterPro:IPR016283), Glycoside hydrolase, family 19, catalytic (InterPro:IPR000726); BEST Arabidopsis thalian…	AT1G02360	Chitinase family protein	stress.biotic				35	51	25	36	37	61	56	68	60	174	79	65	42	79	80	97	57	1.5691	2.41582	0.96437	2.26295	2.33056	2.91733	2.97169	3.38424	3.60937	8.87065	4.6626	3.38367	2.92694	4.80381	4.76352	4.51244	3.02006	1.64976	2.50361	3.32177	5.63897	4.16476	3.76625	0.729079
AT1G02370.1		Tetratricopeptide repeat (TPR)-like superfamily protein; CONTAINS InterPro DOMAIN/s: Pentatricopeptide repeat (InterPro:IPR002885); BEST Arabidopsis thaliana protein match is: Tetratricopeptide repeat (TPR)-like superfamily protein (TAIR:AT4G01990.1); Has 6320 Blast hits to 3912 proteins in 155 species: Archae - 0; Bacteria - 6; Metazoa - 44; Fungi - 46; Plants - 6080; Viruses - 0; Other Eukaryot…	AT1G02370	Tetratricopeptide repeat (TPR)-like superfamily protein	RNA.regulation of transcription.putative transcription regulator				133	145	116	119	116	163	152	136	114	150	130	140	58	109	122	159	146	3.19091	3.66991	2.39499	4.00127	3.90003	4.16081	4.31939	3.61277	3.66228	4.05145	4.08914	3.89265	2.15407	3.5441	3.8813	3.95605	4.12073	3.08527	4.0207	3.86481	4.01108	3.19316	4.03839	0.643992
AT1G02380.1		unknown protein; BEST Arabidopsis thaliana protein match is: unknown protein (TAIR:AT4G01960.1); Has 66 Blast hits to 66 proteins in 11 species: Archae - 0; Bacteria - 0; Metazoa - 0; Fungi - 0; Plants - 66; Viruses - 0; Other Eukaryotes - 0 (source: NCBI BLink).	AT1G02380	transmembrane protein	not assigned.unknown				117	57	94	38	42	31	66	57	52	101	33	46	45	62	54	73	52	4.65044	2.39292	3.21494	2.11754	2.34401	1.3136	3.10567	2.51349	2.77196	4.55391	1.72505	2.12204	2.77754	3.34186	2.84962	3.01042	2.43995	3.41943	1.92505	2.79704	2.80033	2.98967	2.72519	1.14257
AT1G02390.1	putative sn-glycerol-3-phosphate 2-O-acyltransferase	glycerol-3-phosphate acyltransferase 2 (GPAT2); FUNCTIONS IN: acyltransferase activity; INVOLVED IN: metabolic process; EXPRESSED IN: 13 plant structures; EXPRESSED DURING: 8 growth stages; CONTAINS InterPro DOMAIN/s: Phospholipid/glycerol acyltransferase (InterPro:IPR002123); BEST Arabidopsis thaliana protein match is: glycerol-3-phosphate acyltransferase 3 (TAIR:AT4G01950.1); Has 367 Blast hits…	GPAT2	glycerol-3-phosphate acyltransferase 2	lipid metabolism.Phospholipid synthesis				190	243	340	20	18	51	188	164	132	123	102	80	83	154	158	49	52	4.46672	6.02628	6.87856	0.658943	0.592964	1.27557	5.23499	4.26865	4.155	3.25459	3.14354	2.17951	3.02023	4.90641	4.92527	1.19461	1.43797	5.79052	0.842492	4.55288	2.85921	4.28397	1.31629	1.22308
AT1G02391.1		unknown protein; Has 30201 Blast hits to 17322 proteins in 780 species: Archae - 12; Bacteria - 1396; Metazoa - 17338; Fungi - 3422; Plants - 5037; Viruses - 0; Other Eukaryotes - 2996 (source: NCBI BLink).			not assigned.unknown				0	0	0	0	0	0	0	0	0	0	0	0	0	0	0	0	0	0	0	0	0	0	0	0	0	0	0	0	0	0	0	0	0	0	0	0	0	0	0	0	0
AT1G02400.1	Encodes a gibberellin 2-oxidase that acts on C19 gibberellins but not C20 gibberellins.	gibberellin 2-oxidase 6 (GA2OX6); CONTAINS InterPro DOMAIN/s: Oxoglutarate/iron-dependent oxygenase (InterPro:IPR005123); BEST Arabidopsis thaliana protein match is: gibberellin 2-oxidase 4 (TAIR:AT1G47990.1); Has 8143 Blast hits to 8109 proteins in 973 species: Archae - 0; Bacteria - 1087; Metazoa - 68; Fungi - 840; Plants - 4773; Viruses - 0; Other Eukaryotes - 1375 (source: NCBI BLink).	GA2OX6	gibberellin 2-oxidase 6	hormone metabolism.gibberelin.synthesis-degradation.GA2 oxidase				94	80	40	40	32	88	38	41	31	129	118	55	29	38	245	46	96	3.05064	2.74067	1.11707	1.81967	1.45686	3.04185	1.46032	1.47484	1.34828	4.73236	5.02919	2.07024	1.45937	1.67189	10.5504	1.54855	3.67201	2.30279	2.10613	1.42781	3.94393	4.56055	2.61028	1.0385
AT1G02405.1		proline-rich family protein; BEST Arabidopsis thaliana protein match is: proline-rich family protein (TAIR:AT1G70990.1); Has 45319 Blast hits to 18313 proteins in 1048 species: Archae - 86; Bacteria - 6513; Metazoa - 15272; Fungi - 3775; Plants - 11142; Viruses - 2024; Other Eukaryotes - 6507 (source: NCBI BLink).	AT1G02405	proline-rich family protein	signalling.receptor kinases.proline extensin like				25	40	28	16	12	27	22	25	14	35	23	47	16	19	22	29	25	2.56264	4.35292	2.46951	2.30339	1.74124	2.97489	2.66546	2.8662	1.93716	4.1978	3.14087	5.62627	2.57944	2.64796	3.00971	3.09043	3.06892	3.12836	2.33984	2.48961	4.32165	2.7457	3.07967	1.06152
AT1G02405.1		proline-rich family protein; BEST Arabidopsis thaliana protein match is: proline-rich family protein (TAIR:AT1G70990.1); Has 45319 Blast hits to 18313 proteins in 1048 species: Archae - 86; Bacteria - 6513; Metazoa - 15272; Fungi - 3775; Plants - 11142; Viruses - 2024; Other Eukaryotes - 6507 (source: NCBI BLink).	AT1G02405	proline-rich family protein	cell wall.cell wall proteins.LRR				25	40	28	16	12	27	22	25	14	35	23	47	16	19	22	29	25	2.56264	4.35292	2.46951	2.30339	1.74124	2.97489	2.66546	2.8662	1.93716	4.1978	3.14087	5.62627	2.57944	2.64796	3.00971	3.09043	3.06892	3.12836	2.33984	2.48961	4.32165	2.7457	3.07967	1.06152
AT1G02410.1		cytochrome c oxidase assembly protein CtaG / Cox11 family; FUNCTIONS IN: copper ion binding; INVOLVED IN: biological_process unknown; EXPRESSED IN: 24 plant structures; EXPRESSED DURING: 15 growth stages; CONTAINS InterPro DOMAIN/s: Cytochrome c oxidase assembly protein CtaG/Cox11 (InterPro:IPR007533); Has 2749 Blast hits to 2749 proteins in 659 species: Archae - 0; Bacteria - 997; Metazoa - 98; …	AT1G02410	cytochrome c oxidase assembly protein CtaG / Cox11 family	mitochondrial electron transport / ATP synthesis.cytochrome c oxidase				609	775	713	514	524	740	495	528	438	752	679	694	378	552	487	785	747	22.9073	30.7845	23.0775	27.1043	27.6677	29.6663	22.0441	22.0276	22.0908	32.0539	33.5755	30.2913	22.07	28.1544	24.3163	30.6334	33.1544	25.5898	28.1461	22.0542	31.9736	24.8469	31.8939	4.49958
AT1G02420.1		Pentatricopeptide repeat (PPR) superfamily protein; FUNCTIONS IN: molecular_function unknown; INVOLVED IN: biological_process unknown; LOCATED IN: endomembrane system; EXPRESSED IN: 14 plant structures; EXPRESSED DURING: 7 growth stages; CONTAINS InterPro DOMAIN/s: Pentatricopeptide repeat (InterPro:IPR002885); BEST Arabidopsis thaliana protein match is: Tetratricopeptide repeat (TPR)-like superf…	AT1G02420	Pentatricopeptide repeat (PPR) superfamily protein	not assigned.no ontology.pentatricopeptide (PPR) repeat-containing protein				84	78	88	69	60	71	63.4843	59	59	95	69	70	41	44.401	50	64	71	2.44423	2.39525	2.2035	2.81416	2.44815	2.19953	2.18764	1.90209	2.29997	3.11968	2.63497	2.36168	1.84867	1.7513	1.93001	1.93156	2.43315	2.34766	2.48728	2.1299	2.70544	1.84333	2.18235	0.127226
AT1G02430.1	A member of ARF GTPase family. A thaliana has 21 members of this family, known to be essential for vesicle coating and uncoating and functions in GTP-binding. Gene encoding ADP-ribosylation factor and similar to other ARFs and ARF-like proteins.	ADP-ribosylation factor D1B (ARFD1B); FUNCTIONS IN: GTP binding; INVOLVED IN: N-terminal protein myristoylation; LOCATED IN: intracellular; CONTAINS InterPro DOMAIN/s: ADP-ribosylation factor (InterPro:IPR006688), Small GTPase SAR1-type (InterPro:IPR006687), ARF/SAR superfamily (InterPro:IPR006689); BEST Arabidopsis thaliana protein match is: ADP-ribosylation factor D1A (TAIR:AT1G02440.1); Has 88…	ARFD1B	ADP-ribosylation factor D1B	protein.postranslational modification				30.1475	25	32.8222	21	24	31.9154	27.9482	27.8728	28	46.8331	36.9271	30.478	20	27.3304	41.396	30.5202	29.7864	2.12493	1.8655	1.99027	2.0766	2.3844	2.4076	2.32989	2.18797	2.6551	3.8011	3.44411	2.50041	2.20237	2.61554	3.88306	2.23386	2.49544	1.99357	2.28953	2.39099	3.24854	2.90032	2.36465	0.129746
AT1G02440.1	A member of ARF GTPase family. A thaliana has 21 members of this family, known to be essential for vesicle coating and uncoating and functions in GTP-binding. Gene encoding ADP-ribosylation factor and similar to other ARFs and ARF-like proteins.	ADP-ribosylation factor D1A (ARFD1A); FUNCTIONS IN: GTP binding; INVOLVED IN: N-terminal protein myristoylation; LOCATED IN: intracellular; CONTAINS InterPro DOMAIN/s: ADP-ribosylation factor (InterPro:IPR006688), Ras GTPase (InterPro:IPR001806), Small GTPase SAR1-type (InterPro:IPR006687), ARF/SAR superfamily (InterPro:IPR006689); BEST Arabidopsis thaliana protein match is: ADP-ribosylation fact…	ARFD1A	ADP-ribosylation factor D1A	signalling.G-proteins				3.85255	2	1.17775	0	1	1.08459	3.56756	3.12725	1	7.16694	1.07288	3.52198	0	3.26857	2.60404	4.47978	6.21363	0.351943	0.193756	0.092558	0	0.129117	0.106324	0.385254	0.319005	0.12316	0.761722	0.130249	0.375259	0	0.405703	0.317136	0.425264	0.677918	0.212752	0.0784803	0.275806	0.42241	0.240946	0.551591	0.130732
AT1G02450.1	NIMIN1 modulates PR gene expression according the following model: NPR1 forms a ternary complex with NIMIN1 and TGA factors upon SAR induction that binds to a positive regulatory cis-element of the PR-1 promoter, termed LS7. This leads to PR-1 gene induction. NIMIN1 decreases transcriptional activation, possibly through its EAR motif, which results in fine-tuning of PR-1 gene expression.	NIM1-interacting 1 (NIMIN1); FUNCTIONS IN: protein binding; INVOLVED IN: regulation of systemic acquired resistance, defense response to bacterium, negative regulation of transcription; LOCATED IN: nucleus; EXPRESSED IN: 20 plant structures; EXPRESSED DURING: 13 growth stages; BEST Arabidopsis thaliana protein match is: systemic acquired resistance (SAR) regulator protein NIMIN-1-related (TAIR:AT…	NIMIN1	NIM1-interacting 1	RNA.regulation of transcription.unclassified				51	46	8	13	30	19	73	59	20	45	26	10	12	42	12	20	15	5.04019	4.8248	0.680261	1.80417	4.1953	2.01735	8.52796	6.51842	2.66731	5.19444	3.42056	1.15371	1.86376	5.64248	1.58227	2.05481	1.77379	3.51508	2.67227	5.90456	3.25624	3.0295	1.9143	2.45739
AT1G02460.1		Pectin lyase-like superfamily protein; FUNCTIONS IN: polygalacturonase activity; INVOLVED IN: carbohydrate metabolic process; EXPRESSED IN: stem, root, stamen, seed; EXPRESSED DURING: 4 anthesis, E expanded cotyledon stage; CONTAINS InterPro DOMAIN/s: Pectin lyase fold/virulence factor (InterPro:IPR011050), Glycoside hydrolase, family 28 (InterPro:IPR000743), Pectin lyase fold (InterPro:IPR012334…	AT1G02460	Pectin lyase-like superfamily protein	cell wall.degradation.pectate lyases and polygalacturonases				25	31	34	9	17	37	38	28	20	23	16	15	21	14	25	13	20	0.582752	0.762266	0.682034	0.294013	0.555267	0.917561	1.04919	0.722607	0.624204	0.603373	0.488911	0.405192	0.757656	0.442258	0.772707	0.314253	0.54836	0.675684	0.588947	0.798667	0.499159	0.65754	0.431306	0.0899253
AT1G02470.1		Polyketide cyclase/dehydrase and lipid transport superfamily protein; FUNCTIONS IN: molecular_function unknown; INVOLVED IN: biological_process unknown; LOCATED IN: chloroplast; EXPRESSED IN: 10 plant structures; EXPRESSED DURING: 4 anthesis, C globular stage, petal differentiation and expansion stage; CONTAINS InterPro DOMAIN/s: Streptomyces cyclase/dehydrase (InterPro:IPR005031); BEST Arabidops…	AT1G02470	Polyketide cyclase/dehydrase and lipid transport superfamily protein	not assigned.unknown				164	106.194	27	74.328	50.9131	92	72	66	51.835	231.619	108.949	211.771	60	101.034	98.5426	99.5678	150.49	8.85577	6.06313	1.25442	5.62878	3.86713	5.30578	4.60071	3.96091	3.7593	14.2862	7.75918	13.2896	5.04511	7.40259	7.07248	5.58049	9.6235	5.39111	4.9339	4.10697	11.7783	6.50673	7.60199	3.84498
AT1G02470.2		Polyketide cyclase/dehydrase and lipid transport superfamily protein; FUNCTIONS IN: molecular_function unknown; INVOLVED IN: biological_process unknown; LOCATED IN: chloroplast; EXPRESSED IN: 10 plant structures; EXPRESSED DURING: 4 anthesis, C globular stage, petal differentiation and expansion stage; CONTAINS InterPro DOMAIN/s: Streptomyces cyclase/dehydrase (InterPro:IPR005031); BEST Arabidops…	AT1G02470	Polyketide cyclase/dehydrase and lipid transport superfamily protein	not assigned.unknown				0	3.80637	0	3.67205	4.08686	0	0	0	4.16502	17.3814	16.0511	14.2295	0	2.96635	16.4574	3.43216	8.50989	0	0.220425	0	0.282035	0.314859	0	0	0	0.30638	1.08771	1.15955	0.905714	0	0.220434	1.19801	0.195099	0.552012	0.073475	0.198965	0.102127	1.05099	0.472815	0.373555	0.127262
AT1G02475.1		Polyketide cyclase/dehydrase and lipid transport superfamily protein; FUNCTIONS IN: molecular_function unknown; INVOLVED IN: biological_process unknown; LOCATED IN: chloroplast; EXPRESSED IN: 22 plant structures; EXPRESSED DURING: 13 growth stages; CONTAINS InterPro DOMAIN/s: Streptomyces cyclase/dehydrase (InterPro:IPR005031); BEST Arabidopsis thaliana protein match is: Polyketide cyclase / dehy…	AT1G02475	Polyketide cyclase/dehydrase and lipid transport superfamily protein	not assigned.unknown				1316	1638	1984	1436	1432	1977	1147	1323	1286	1691	1574	1851	1028	1406	1370	2114	1804	65.2164	85.7993	84.5962	99.791	99.765	104.578	67.272	72.8262	85.5555	95.5137	102.786	106.559	79.2665	94.5245	90.2063	108.723	105.767	78.5373	101.378	75.2179	101.62	87.9991	107.245	11.5519
AT1G02480.1		tRNA-Phe (anticodon: GAA)	AT1G02480	tRNA-Phe	protein.synthesis.transfer RNA.nucleus.tRNA-Phe				0	0	0.133333	0	0	0	0	0	0	0	0	0.0666667	0	0.0550016	0	0	0	0	0	0.185669	0	0	0	0	0	0	0	0	0.121089	0	0.123934	0	0	0	0.0618897	0	0	0.040363	0.0413113	0	0.107196
AT1G02490.1		unknown protein; Has 0 Blast hits to 0 proteins in 0 species (source: NCBI BLink).	AT1G02490	hypothetical protein	not assigned.unknown				0	3	2	3	1	0	4	1	0	7	1	2	0	3	0	1	0	0	9.12644	5.04685	11.8657	3.88731	0	13.4479	3.01011	0	22.4091	3.7215	6.28803	0	11.1763	0	2.9325	0	4.72443	5.251	5.486	10.8062	3.72543	1.46625	4.57175
AT3G47340.2	encodes a glutamine-dependent asparagine synthetase, the predicted ASN1 peptide contains a purF-type glutamine-binding domain, and is expressed predominantly in shoot tissues, where light has a negative effect on its mRNA accumulation. Expression is induced within 3 hours of dark treatment, in senescing leaves and treatment with exogenous photosynthesis inhibitor. Induction of gene expression was…	glutamine-dependent asparagine synthase 1 (ASN1); CONTAINS InterPro DOMAIN/s: Rossmann-like alpha/beta/alpha sandwich fold (InterPro:IPR014729), Asparagine synthase (InterPro:IPR001962), Asparagine synthase, glutamine-hydrolyzing (InterPro:IPR006426), Glutamine amidotransferase, type II (InterPro:IPR017932); BEST Arabidopsis thaliana protein match is: asparagine synthetase 2 (TAIR:AT5G65010.2); H…	ASN1	glutamine-dependent asparagine synthase 1	amino acid metabolism.synthesis.aspartate family.asparagine.asparagine synthetase	ASN1	ASN	0	7.28137	53.8492	10.043	0	20.0314	40.0359	19.3313	12.5117	13.8078	12.3027	27.3988	19.176	5.90903	6.30407	41.7794	28.3475	15.2443	0.130695	1.01917	0.155133	0	0.503472	0.763992	0.411057	0.248469	0.331656	0.247881	0.643993	0.39867	0.163985	0.153312	0.993934	0.527577	0.321463	0.434999	0.422488	0.330394	0.430181	0.437077	0.42452	0.506054
AT3G47340.3	encodes a glutamine-dependent asparagine synthetase, the predicted ASN1 peptide contains a purF-type glutamine-binding domain, and is expressed predominantly in shoot tissues, where light has a negative effect on its mRNA accumulation. Expression is induced within 3 hours of dark treatment, in senescing leaves and treatment with exogenous photosynthesis inhibitor. Induction of gene expression was…	glutamine-dependent asparagine synthase 1 (ASN1); CONTAINS InterPro DOMAIN/s: Rossmann-like alpha/beta/alpha sandwich fold (InterPro:IPR014729), Asparagine synthase (InterPro:IPR001962), Asparagine synthase, glutamine-hydrolyzing (InterPro:IPR006426), Glutamine amidotransferase, type II (InterPro:IPR017932); BEST Arabidopsis thaliana protein match is: asparagine synthetase 3 (TAIR:AT5G10240.1); H…	ASN1	glutamine-dependent asparagine synthase 1	amino acid metabolism.synthesis.aspartate family.asparagine.asparagine synthetase	ASN1	ASN	0	3.31498	22.5443	0	0	0	11.2285	3.8809	3.78852	3.68634	7.1404	4.04962	14.1422	0	0	0	8.02775	7.10838	0.0573389	0.411157	0	0	0	0.206466	0.0795257	0.0724959	0.0853205	0.138597	0.0917134	0.283315	0	0	0	0.143973	0.144429	0.156165	0.068822	0.079114	0.171208	0	0.144201	0.222683
AT1G02510.1	Encodes AtTPK4, a member of the Arabidopsis thaliana K+ channel family of AtTPK/KCO proteins. AtTPK4 is targeted to the plasma membrane. In contrast other members of the AtTPK proteins are located in tonoplast. AtTPK4 forms a voltage-independent K+ channel that is blocked by extracellular calcium ions. May form homomeric ion channels in vivo.	TPK4; FUNCTIONS IN: outward rectifier potassium channel activity; INVOLVED IN: potassium ion transport; LOCATED IN: membrane; CONTAINS InterPro DOMAIN/s: Potassium channel, two pore-domain (InterPro:IPR003280), Ion transport 2 (InterPro:IPR013099); BEST Arabidopsis thaliana protein match is: Ca2+ activated outward rectifying K+ channel 5 (TAIR:AT4G01840.1); Has 5041 Blast hits to 4858 proteins in…	TPK4	Outward rectifying potassium channel protein	transport.potassium				0	0	0	1	1	0	0	0	0	1	0	0	0	0	0	0	0	0	0	0	0.0578127	0.0579096	0	0	0	0	0.0468097	0	0	0	0	0	0	0	0	0.0385741	0	0.0156032	0	0	0
AT1G02520.1	Encodes an ATP-binding cassette (ABC) transporter. Expressed in the vascular tissue of primary stem.	P-glycoprotein 11 (PGP11); FUNCTIONS IN: ATPase activity, coupled to transmembrane movement of substances; INVOLVED IN: transport, transmembrane transport; LOCATED IN: plasma membrane; EXPRESSED IN: callus; CONTAINS InterPro DOMAIN/s: ATPase, AAA+ type, core (InterPro:IPR003593), ABC transporter-like (InterPro:IPR003439), ABC transporter, transmembrane domain, type 1 (InterPro:IPR011527), ABC tra…	ABCB11	P-glycoprotein 11	transport.ABC transporters and multidrug resistance systems				24	5	6	9	9	13	22	16	15	25	66	15	3	16.8467	11	13	4	0.248741	0.0546109	0.0535189	0.130687	0.130493	0.143106	0.270183	0.183296	0.20788	0.289801	0.894407	0.179942	0.0480002	0.2365	0.151016	0.139673	0.0486239	0.118957	0.134762	0.220453	0.454717	0.145172	0.0941484	0.112398
AT1G02530.1		P-glycoprotein 12 (PGP12); FUNCTIONS IN: ATPase activity, coupled to transmembrane movement of substances; INVOLVED IN: response to cyclopentenone; LOCATED IN: integral to membrane; CONTAINS InterPro DOMAIN/s: ATPase, AAA+ type, core (InterPro:IPR003593), ABC transporter-like (InterPro:IPR003439), ABC transporter, transmembrane domain, type 1 (InterPro:IPR011527), ABC transporter integral membran…	ABCB12	P-glycoprotein 12	transport.ABC transporters and multidrug resistance systems				6	3	4	7	2	11	5	1	3	10	5	6	1	3.15325	3	8	6	0.0601323	0.031684	0.0345015	0.0982891	0.0280399	0.117087	0.0593788	0.0110774	0.040202	0.112075	0.0655168	0.0695984	0.0154708	0.0428045	0.0398255	0.0831143	0.0705227	0.0421059	0.0811387	0.0368861	0.0823967	0.0327003	0.0768185	0.0156747
AT1G02540.1		unknown protein; Has 3327 Blast hits to 2216 proteins in 265 species: Archae - 18; Bacteria - 202; Metazoa - 802; Fungi - 283; Plants - 84; Viruses - 187; Other Eukaryotes - 1751 (source: NCBI BLink).	AT1G02540	hypothetical protein	not assigned.unknown				0	0	0	0	0	0	0	0	0	0	0	0	0	0	0	0	0	0	0	0	0	0	0	0	0	0	0	0	0	0	0	0	0	0	0	0	0	0	0	0	0
AT1G02550.1		Plant invertase/pectin methylesterase inhibitor superfamily protein; FUNCTIONS IN: enzyme inhibitor activity, pectinesterase inhibitor activity, pectinesterase activity; INVOLVED IN: biological_process unknown; LOCATED IN: endomembrane system; CONTAINS InterPro DOMAIN/s: Pectinesterase inhibitor (InterPro:IPR006501); BEST Arabidopsis thaliana protein match is: Plant invertase/pectin methylesteras…	AT1G02550	Plant invertase/pectin methylesterase inhibitor superfamily protein	misc.invertase/pectin methylesterase inhibitor family protein				0	1	0	0	0	0	0	0	1	0	0	0	0	0	0	0	0	0	0.0705976	0	0	0	0	0	0	0.0897046	0	0	0	0	0	0	0	0	0.0235325	0	0.0299015	0	0	0	0.0407595
AT1G02560.1	One of several nuclear-encoded ClpPs (caseinolytic protease). Contains a highly conserved catalytic triad of Ser-type proteases (Ser-His-Asp). The name reflects nomenclature described in Adam et. al (2001).	nuclear encoded CLP protease 5 (CLPP5); FUNCTIONS IN: serine-type endopeptidase activity; INVOLVED IN: peptidyl-cysteine S-nitrosylation; LOCATED IN: in 7 components; EXPRESSED IN: 23 plant structures; EXPRESSED DURING: 14 growth stages; CONTAINS InterPro DOMAIN/s: Peptidase S14, ClpP, active site (InterPro:IPR018215), Peptidase S14, ClpP (InterPro:IPR001907); BEST Arabidopsis thaliana protein ma…	CLPP5	nuclear encoded CLP protease 5	protein.degradation.serine protease				8119	7737	10943	7220	7068	9576	5339	6208	5507	7465	7023	8523	4949	6384	6691	9365	7442	263.048	264.61	305.089	327.898	321.242	330.45	204.83	222.935	239.111	273.386	298.815	320.271	248.628	280.406	287.648	314.735	284.175	277.582	326.53	222.292	297.491	272.227	299.455	23.8343
AT1G02570.1		unknown protein; BEST Arabidopsis thaliana protein match is: unknown protein (TAIR:AT1G02575.1); Has 108 Blast hits to 55 proteins in 6 species: Archae - 0; Bacteria - 0; Metazoa - 0; Fungi - 0; Plants - 108; Viruses - 0; Other Eukaryotes - 0 (source: NCBI BLink).	AT1G02570	transmembrane protein	not assigned.unknown				0	0	2	0	0	0	0	1	0	0	1	0	0	0	1	0	0	0	0	0.0878755	0	0	0	0	0.0567339	0	0	0.0673117	0	0	0	0.0678578	0	0	0.0292918	0	0.0189113	0.0224372	0.0226193	0	0.0507349
AT1G02575.1		unknown protein; BEST Arabidopsis thaliana protein match is: unknown protein (TAIR:AT1G02570.1).	AT1G02575	transmembrane protein	not assigned.unknown				0	0	0	0	0	0	0	0	0	0	0	0	0	0	0	0	0	0	0	0	0	0	0	0	0	0	0	0	0	0	0	0	0	0	0	0	0	0	0	0	0
AT1G02580.1	Encodes a putative transcription factor MEDEA (MEA) that negatively regulates seed development in the absence of fertilization. Mutations in this locus result in embryo lethality. MEA is a Polycomb group gene that is imprinted in the endosperm. The maternal allele is expressed and the paternal allele is silent. MEA is controlled by DEMETER (DME), a DNA glycosylase required to activate MEA express…	MEDEA (MEA); CONTAINS InterPro DOMAIN/s: SANT, DNA-binding (InterPro:IPR001005), SET domain (InterPro:IPR001214); BEST Arabidopsis thaliana protein match is: SET domain-containing protein (TAIR:AT4G02020.1); Has 4870 Blast hits to 4762 proteins in 465 species: Archae - 0; Bacteria - 401; Metazoa - 1924; Fungi - 484; Plants - 1009; Viruses - 0; Other Eukaryotes - 1052 (source: NCBI BLink).	MEA	SET domain-containing protein	development.unspecified				13	22	3	2	2	7	4	3	2	15	11	9	5	7	7	6	4	0.234212	0.41794	0.0465142	0.0504922	0.0504566	0.134079	0.0853732	0.0597998	0.0482187	0.303367	0.259519	0.187811	0.139279	0.170874	0.167154	0.112084	0.0846663	0.232889	0.0783426	0.0644639	0.250232	0.159102	0.0983751	0.185716
AT1G02590.1		Aldehyde oxidase/xanthine dehydrogenase, molybdopterin binding protein; FUNCTIONS IN: oxidoreductase activity, aldehyde oxidase activity; INVOLVED IN: oxidation reduction; LOCATED IN: cellular_component unknown; CONTAINS InterPro DOMAIN/s: Aldehyde oxidase/xanthine dehydrogenase, molybdopterin binding (InterPro:IPR008274); BEST Arabidopsis thaliana protein match is: aldehyde oxidase 4 (TAIR:AT1G0…	AT1G02590	Aldehyde oxidase/xanthine dehydrogenase, molybdopterin binding protein	hormone metabolism.abscisic acid.synthesis-degradation				0	0	0	0	0	0	0	0	0	0	0	0	0	0	0	0	0	0	0	0	0	0	0	0	0	0	0	0	0	0	0	0	0	0	0	0	0	0	0	0	0
AT1G02600.1		tRNA-His (anticodon: GTG)	AT1G02600	tRNA-His	protein.synthesis.transfer RNA.nucleus.tRNA-His				0	0	0.166667	0	0	0	0	0	0.166667	0.166667	0	0	0	0	0	0	0	0	0	0.242252	0	0	0	0	0	0.418493	0.303366	0	0	0	0	0	0	0	0.0807507	0	0.139498	0.101122	0	0	0.139864
AT1G02610.1		RING/FYVE/PHD zinc finger superfamily protein; FUNCTIONS IN: zinc ion binding; CONTAINS InterPro DOMAIN/s: Protein of unknown function DUF3675 (InterPro:IPR022143), Zinc finger, C3HC4 RING-type (InterPro:IPR018957), Zinc finger, RING-CH-type (InterPro:IPR011016); BEST Arabidopsis thaliana protein match is: RING/FYVE/PHD zinc finger superfamily protein (TAIR:AT4G02075.1); Has 1637 Blast hits to 16…	AT1G02610	RING/FYVE/PHD zinc finger superfamily protein	protein.degradation.ubiquitin.E3.RING				29	20	10	26	29	31	13	29	13	103	64	50	12	16	29	63	53	1.42251	1.03691	0.422054	1.78839	1.99969	1.62303	0.754706	1.57999	0.856023	5.75718	4.13639	2.84899	0.915779	1.0647	1.88997	3.20707	3.07539	0.960491	1.8037	1.06357	4.24752	1.29015	3.14123	0.504587
AT1G02620.1		Ras-related small GTP-binding family protein; FUNCTIONS IN: GTP binding; INVOLVED IN: intracellular protein transport; LOCATED IN: endomembrane system, intracellular; CONTAINS InterPro DOMAIN/s: Small GTPase SAR1-type (InterPro:IPR006687), ARF/SAR superfamily (InterPro:IPR006689); BEST Arabidopsis thaliana protein match is: secretion-associated RAS super family 2 (TAIR:AT4G02080.1); Has 4733 Blas…	AT1G02620	Ras-related small GTP-binding family protein	signalling.G-proteins				0	0	0	0	1	0	0	0	0	0	0	0	0	0	0	0	0	0	0	0	0	0.101407	0	0	0	0	0	0	0	0	0	0	0	0	0	0.0338023	0	0	0	0	0
AT1G02630.1		Nucleoside transporter family protein; FUNCTIONS IN: nucleoside transmembrane transporter activity; INVOLVED IN: transport; LOCATED IN: membrane; CONTAINS InterPro DOMAIN/s: Delayed-early response protein/equilibrative nucleoside transporter (InterPro:IPR002259); BEST Arabidopsis thaliana protein match is: equilibrative nucleotide transporter 1 (TAIR:AT1G70330.1); Has 1148 Blast hits to 1019 prot…	AT1G02630	Nucleoside transporter family protein	transport.unspecified cations				16	1.45245	14	17	15	9	4.06192	0	1	0	0	3	23	0	2	5	17	0.423099	0.0405254	0.318584	0.63006	0.556023	0.253295	0.127214	0	0.035417	0	0	0.0919592	0.941957	0	0.0701436	0.137127	0.529131	0.260736	0.479793	0.0542103	0.0306531	0.337367	0.333129	0.197738
AT1G02630.2		Nucleoside transporter family protein; FUNCTIONS IN: nucleoside transmembrane transporter activity; INVOLVED IN: transport; LOCATED IN: membrane; CONTAINS InterPro DOMAIN/s: Delayed-early response protein/equilibrative nucleoside transporter (InterPro:IPR002259); BEST Arabidopsis thaliana protein match is: equilibrative nucleotide transporter 1 (TAIR:AT1G70330.1); Has 35333 Blast hits to 34131 pr…	AT1G02630	Nucleoside transporter family protein	transport.unspecified cations				0	1.54755	0	0	0	0	6.93808	1	0	5	3	0	0	3	0	0	0	0	0.0490436	0	0	0	0	0.246711	0.0332721	0	0.169512	0.118244	0	0	0.122111	0	0	0	0.0163479	0	0.0933277	0.0959187	0.0407037	0	0.0283153
AT1G02640.1	encodes a protein similar to a beta-xylosidase located in the extracellular matrix. This is a member of glycosyl hydrolase family 3 and has six other closely related members.	beta-xylosidase 2 (BXL2); FUNCTIONS IN: hydrolase activity, hydrolyzing O-glycosyl compounds; INVOLVED IN: carbohydrate metabolic process; LOCATED IN: plant-type cell wall; EXPRESSED IN: 23 plant structures; EXPRESSED DURING: 13 growth stages; CONTAINS InterPro DOMAIN/s: Glycoside hydrolase, family 3, N-terminal (InterPro:IPR001764), Glycoside hydrolase, family 3, C-terminal (InterPro:IPR002772),…	BXL2	beta-xylosidase 2	cell wall.degradation.mannan-xylose-arabinose-fucose				585	270	455	387	318	329	166	119	90	310	231	125	391	183	229	340	379	9.27027	4.51082	6.20516	8.59321	7.05455	5.54131	3.11653	2.08583	1.90812	5.50883	4.79153	2.29389	9.57579	3.92882	4.80897	5.5862	7.05267	6.66208	7.06302	2.37016	4.19808	6.10453	6.31944	2.4124
AT1G02650.1		Tetratricopeptide repeat (TPR)-like superfamily protein; FUNCTIONS IN: heat shock protein binding, binding; INVOLVED IN: protein folding; LOCATED IN: cellular_component unknown; CONTAINS InterPro DOMAIN/s: Tetratricopeptide-like helical (InterPro:IPR011990), Heat shock protein DnaJ, N-terminal (InterPro:IPR001623); BEST Arabidopsis thaliana protein match is: Heat shock protein DnaJ with tetratric…	AT1G02650	Tetratricopeptide repeat (TPR)-like superfamily protein	stress.abiotic.heat				19	18	9	6	2	6	14	9	12	7	11	5	12	10	23	11	5	0.52663	0.526468	0.214667	0.233092	0.0777196	0.177025	0.459564	0.276334	0.445533	0.218819	0.400028	0.160667	0.515259	0.375692	0.845589	0.316222	0.163169	0.422588	0.162612	0.39381	0.259838	0.578847	0.239696	0.180065
AT1G02660.1		alpha/beta-Hydrolases superfamily protein; FUNCTIONS IN: triglyceride lipase activity; INVOLVED IN: lipid metabolic process; LOCATED IN: cellular_component unknown; EXPRESSED IN: 24 plant structures; EXPRESSED DURING: 15 growth stages; CONTAINS InterPro DOMAIN/s: Lipase, class 3 (InterPro:IPR002921); BEST Arabidopsis thaliana protein match is: alpha/beta-Hydrolases superfamily protein (TAIR:AT3G6…	AT1G02660	alpha/beta-Hydrolases superfamily protein	lipid metabolism.lipid degradation.lipases.triacylglycerol lipase				119	165	115	86	96	83	127	72	97	117	125	106	78	96	154	81	164	1.86657	2.72854	1.55239	1.89017	2.10797	1.38371	2.36009	1.24916	2.03558	2.05783	2.56637	1.9254	1.89077	2.04005	3.20105	1.31729	3.02067	2.04917	1.79395	1.88161	2.1832	2.37729	2.16898	0.608965
AT1G02670.1		P-loop containing nucleoside triphosphate hydrolases superfamily protein; FUNCTIONS IN: helicase activity, DNA binding, ATP binding, nucleic acid binding; INVOLVED IN: DNA repair; LOCATED IN: cellular_component unknown; EXPRESSED IN: 7 plant structures; EXPRESSED DURING: F mature embryo stage, petal differentiation and expansion stage, E expanded cotyledon stage, D bilateral stage; CONTAINS Inter…	AT1G02670	P-loop containing nucleoside triphosphate hydrolases superfamily protein	DNA.repair				17	32	18	18	33	19	34	17	21	18	15	25	20	23	22	23	32	0.347525	0.689913	0.316666	0.515659	0.944943	0.413069	0.823342	0.384619	0.574624	0.413549	0.401743	0.59209	0.632452	0.637117	0.596203	0.487554	0.768962	0.451368	0.624557	0.594195	0.469127	0.621924	0.628258	0.207161
AT1G02680.1	Encodes a TBP-Associated Factor (TAF) that functions together with PRC2 in transcriptional regulation during seed development.	TBP-associated factor 13 (TAF13); FUNCTIONS IN: RNA polymerase II transcription factor activity, DNA binding; INVOLVED IN: transcription initiation, transcription from RNA polymerase II promoter; LOCATED IN: transcription factor complex; EXPRESSED IN: 23 plant structures; EXPRESSED DURING: 13 growth stages; CONTAINS InterPro DOMAIN/s: Transcription initiation factor IID, 18kDa subunit (InterPro:I…	TAF13	TBP-associated factor 13	RNA.transcription				231	205	271	158	189	256	181	171	155	278	229	264	141	205	177	259	216	11.7807	11.0517	11.8914	11.2997	13.5529	13.9384	10.9242	9.68859	10.6135	16.1707	15.3938	15.6425	11.1906	14.1839	11.9949	13.7086	13.0366	11.5746	12.9303	10.4088	15.7357	12.4565	13.3726	0.456215
AT1G02681.1	Pseudogene of AT4G02160		AT1G02681	pseudogene of cotton fiber protein	not assigned.unknown				0	2	0	0	0	0	0	0	0	0	0	0	0	0	0	0	0	0	0.228037	0	0	0	0	0	0	0	0	0	0	0	0	0	0	0	0.0760123	0	0	0	0	0	0.131657
AT1G02690.1	Putative importin alpha isoform. When overexpressed can rescue the impa-4 decreased transformation susceptibility phenotype.	importin alpha isoform 6 (IMPA-6); FUNCTIONS IN: protein transporter activity, binding; INVOLVED IN: intracellular protein transport, protein import into nucleus; LOCATED IN: nucleus, nuclear pore, cytoplasm; EXPRESSED IN: 20 plant structures; EXPRESSED DURING: 11 growth stages; CONTAINS InterPro DOMAIN/s: Importin-alpha-like, importin-beta-binding domain (InterPro:IPR002652), Armadillo-like heli…	IMPA-6	importin alpha isoform 6	protein.targeting.nucleus				289	167	242	186.853	192	164	276.434	140	100	322	193	163	186	192	128	186	196	6.23872	3.80241	4.49574	5.65277	5.80651	3.76562	7.06867	3.34528	2.88985	7.81644	5.45976	4.07701	6.21255	5.61659	3.66337	4.16373	4.97486	4.84562	5.07497	4.4346	5.7844	5.16417	4.5693	1.25528
AT1G02690.2	Putative importin alpha isoform. When overexpressed can rescue the impa-4 decreased transformation susceptibility phenotype.	importin alpha isoform 6 (IMPA-6); FUNCTIONS IN: protein transporter activity, binding; INVOLVED IN: intracellular protein transport, protein import into nucleus; LOCATED IN: nucleus, nuclear pore, cytoplasm; EXPRESSED IN: 20 plant structures; EXPRESSED DURING: 11 growth stages; CONTAINS InterPro DOMAIN/s: Importin-alpha-like, importin-beta-binding domain (InterPro:IPR002652), Armadillo-like heli…	IMPA-6	importin alpha isoform 6	protein.targeting.nucleus				0	0	0	18.1469	0	0	20.5658	0	0	0	0	0	0	0	0	0	0	0	0	0	0.548067	0	0	0.525004	0	0	0	0	0	0	0	0	0	0	0	0.182689	0.175001	0	0	0	0
AT1G02700.1		unknown protein; FUNCTIONS IN: molecular_function unknown; INVOLVED IN: biological_process unknown; LOCATED IN: mitochondrion; BEST Arabidopsis thaliana protein match is: unknown protein (TAIR:AT4G02140.1); Has 49 Blast hits to 49 proteins in 21 species: Archae - 0; Bacteria - 0; Metazoa - 10; Fungi - 6; Plants - 29; Viruses - 0; Other Eukaryotes - 4 (source: NCBI BLink).	AT1G02700	GATA transcription factor-like protein	not assigned.unknown				64	34	68	17	30	18	34	36	38	23	29	23	45	26	21	25	19	2.80719	1.57562	2.5664	1.04549	1.84858	0.842139	1.76529	1.75271	2.2363	1.14667	1.67427	1.17131	3.06763	1.54677	1.2233	1.13783	0.984716	2.3164	1.2454	1.9181	1.33075	1.9459	1.06127	0.652736
AT1G02710.1		glycine-rich protein; FUNCTIONS IN: molecular_function unknown; INVOLVED IN: biological_process unknown; LOCATED IN: endomembrane system; Has 94175 Blast hits to 22560 proteins in 1554 species: Archae - 109; Bacteria - 35702; Metazoa - 26912; Fungi - 5192; Plants - 9321; Viruses - 1410; Other Eukaryotes - 15529 (source: NCBI BLink).	AT1G02710	glycine-rich protein	not assigned.no ontology.glycine rich proteins				92	65	119	73	78	52	45	74	54	39	42	53	56	43	53	86	44	24.945	18.9351	27.7374	28.0113	30.4437	15.4633	14.3624	22.8488	20.074	13.1143	15.5836	17.0155	24.6646	15.9535	19.4403	24.36	14.6791	23.8725	24.6394	19.0951	15.2378	20.0195	19.5195	4.49809
AT1G02720.1	Encodes a protein with putative galacturonosyltransferase activity.	galacturonosyltransferase 5 (GATL5); FUNCTIONS IN: transferase activity, transferring hexosyl groups, polygalacturonate 4-alpha-galacturonosyltransferase activity, transferase activity, transferring glycosyl groups; INVOLVED IN: carbohydrate biosynthetic process; LOCATED IN: endomembrane system; EXPRESSED IN: 14 plant structures; EXPRESSED DURING: 7 growth stages; CONTAINS InterPro DOMAIN/s: Glyc…	GATL5	galacturonosyltransferase 5	misc.UDP glucosyl and glucoronyl transferases				305.596	238.106	367.842	173.338	172.655	198.713	174.455	187.841	160.264	151.101	168	156.312	148.522	212.995	197.541	236.755	172.096	7.25505	5.96321	7.51515	5.76727	5.74389	5.01917	4.90563	4.9375	5.0945	4.03798	5.22884	4.30059	5.45795	6.8529	6.21865	5.82896	4.80615	6.91114	5.51011	4.97921	4.52247	6.1765	5.31755	0.831166
AT1G02720.2	Encodes a protein with putative galacturonosyltransferase activity.	galacturonosyltransferase 5 (GATL5); FUNCTIONS IN: transferase activity, transferring hexosyl groups, polygalacturonate 4-alpha-galacturonosyltransferase activity, transferase activity, transferring glycosyl groups; INVOLVED IN: carbohydrate biosynthetic process; LOCATED IN: endomembrane system; EXPRESSED IN: 14 plant structures; EXPRESSED DURING: 7 growth stages; CONTAINS InterPro DOMAIN/s: Glyc…	GATL5	galacturonosyltransferase 5	misc.UDP glucosyl and glucoronyl transferases				59.4044	28.8936	55.1575	35.6624	36.3448	59.2873	33.5453	19.159	24.7358	27.8992	0	12.6885	48.4783	24.0048	26.459	12.2447	35.9041	1.74435	0.895403	1.39375	1.46779	1.49656	1.85352	1.16651	0.623329	0.973104	0.924667	0	0.432011	2.20596	0.955481	1.03068	0.372931	1.24174	1.3445	1.60596	0.920981	0.452226	1.39737	0.807335	0.426611
AT1G02730.1	Encodes a gene similar to cellulose synthase. Knock-out mutant has reduced growth, reduced xylan level and reduced xylan synthase activity in stems.	cellulose synthase-like D5 (CSLD5); CONTAINS InterPro DOMAIN/s: Cellulose synthase (InterPro:IPR005150); BEST Arabidopsis thaliana protein match is: cellulose synthase-like D3 (TAIR:AT3G03050.1); Has 3375 Blast hits to 3003 proteins in 709 species: Archae - 13; Bacteria - 1269; Metazoa - 102; Fungi - 19; Plants - 1879; Viruses - 2; Other Eukaryotes - 91 (source: NCBI BLink).	CSLD5	cellulose synthase-like D5	cell wall.cellulose synthesis.cellulose synthase				997	647	961	768	726	694	1243	501	365	1238	725	564	639	716	320	608	714	10.3805	7.09912	8.6113	11.2032	10.5748	7.67477	15.3354	5.76585	5.08165	14.4171	9.87012	6.7969	10.2711	10.0976	4.41338	6.5624	8.71929	8.69697	9.81759	8.72763	10.3614	8.26069	7.64084	1.64237
AT1G02740.1		MRG family protein; FUNCTIONS IN: chromatin binding; INVOLVED IN: chromatin assembly or disassembly; LOCATED IN: chromatin, nucleus; EXPRESSED IN: 15 plant structures; EXPRESSED DURING: 6 growth stages; CONTAINS InterPro DOMAIN/s: Histone H4 acetyltransferase, NuA4 complex, Eaf3/MRG15 subunit (InterPro:IPR017398), Tudor-like, plant (InterPro:IPR014002), MRG (InterPro:IPR008676), Chromo domain (In…	AT1G02740	MRG family protein	RNA.regulation of transcription.Histone acetyltransferases				256	181	196	197	184	232	200	137	132	299	233	251	92	153	181	267	183	8.45039	6.30721	5.56735	9.11545	8.52099	8.15732	7.81737	5.01285	5.83969	11.1596	10.1017	9.61009	4.70953	6.847	7.92817	9.1424	7.1205	6.77498	8.59792	6.2233	10.2905	6.4949	8.13145	1.49736
AT1G02750.1		Drought-responsive family protein; FUNCTIONS IN: zinc ion binding; INVOLVED IN: response to water deprivation; LOCATED IN: intracellular; EXPRESSED IN: 22 plant structures; EXPRESSED DURING: 13 growth stages; CONTAINS InterPro DOMAIN/s: Zinc finger, C2H2-like (InterPro:IPR015880), Drought induced 19/ RING finger protein 114 (InterPro:IPR008598); BEST Arabidopsis thaliana protein match is: Drought…	AT1G02750	Drought-responsive family protein	stress.abiotic.drought/salt				280	276	322	208	261	368	236	256	268	469.735	352	339	187	221	272	399	308	12.7154	13.2438	12.582	13.2444	16.6541	17.8289	12.6856	12.9067	16.3317	24.2645	21.0467	17.8768	13.2023	13.6129	16.4065	18.8023	16.5325	12.8471	15.9091	13.9747	21.0627	14.4072	17.6674	0.349996
AT1G02750.2		Drought-responsive family protein; INVOLVED IN: response to water deprivation; EXPRESSED IN: 22 plant structures; EXPRESSED DURING: 13 growth stages; CONTAINS InterPro DOMAIN/s: Drought induced 19/ RING finger protein 114 (InterPro:IPR008598); BEST Arabidopsis thaliana protein match is: Drought-responsive family protein (TAIR:AT4G02200.1).	AT1G02750	Drought-responsive family protein	stress.abiotic.drought/salt				0	0	0	0	0	0	0	0	0	5.26549	0	0	0	0	0	0	0	0	0	0	0	0	0	0	0	0	0.343017	0	0	0	0	0	0	0	0	0	0	0.114339	0	0	0
AT1G02760.1		tRNA-Lys (anticodon: CTT)	AT1G02760	tRNA-Lys	protein.synthesis.transfer RNA.nucleus.tRNA-Lys				0	0.0666667	0	0	0	0	0	0	0.0625	0	0	0	0	0.0625	0	0	0	0	0.11341	0	0	0	0	0	0	0.15835	0	0	0	0	0.14083	0	0	0	0.0378033	0	0.0527833	0	0.0469433	0	0.0654773
AT1G02770.1		Protein of unknown function (DUF626); CONTAINS InterPro DOMAIN/s: Protein of unknown function DUF626, Arabidopsis thaliana (InterPro:IPR006462); BEST Arabidopsis thaliana protein match is: Protein of unknown function (DUF626) (TAIR:AT1G19060.1); Has 209 Blast hits to 208 proteins in 2 species: Archae - 0; Bacteria - 0; Metazoa - 0; Fungi - 0; Plants - 209; Viruses - 0; Other Eukaryotes - 0 (sourc…	AT1G02770	hypothetical protein	not assigned.unknown				55	38	20	11	19	14	7	18	8	37	26	33	6	19	11	15	24	1.98737	1.44985	0.62186	0.557203	0.96355	0.539061	0.299478	0.721248	0.387544	1.51396	1.23469	1.38348	0.336427	0.930883	0.527559	0.562286	1.02294	1.35303	0.686605	0.469423	1.37738	0.59829	0.792613	0.687885
AT1G02780.1		embryo defective 2386 (emb2386); FUNCTIONS IN: structural constituent of ribosome; INVOLVED IN: translation, ribosome biogenesis, embryo development ending in seed dormancy; LOCATED IN: in 6 components; EXPRESSED IN: 25 plant structures; EXPRESSED DURING: 14 growth stages; CONTAINS InterPro DOMAIN/s: Ribosomal protein L19/L19e (InterPro:IPR000196), Ribosomal protein L19/L19e, domain 3 (InterPro:I…	emb2386	Ribosomal protein L19e family protein	protein.synthesis.ribosomal protein.eukaryotic.60S subunit.L19				16003	16986	20292	13811	13407	14682	12810	13180	10992	16530	12121	14048	8482	12098	15344	15949	12038	701.131	786.263	764.975	848.404	825.185	686.12	664.346	640.955	646.142	823.152	698.984	714.602	577.551	718.902	892.807	725.064	623.179	750.79	786.57	650.481	745.579	729.753	674.121	44.3033
AT1G02790.1	encodes a exopolygalacturonase.	polygalacturonase 4 (PGA4); FUNCTIONS IN: polygalacturonase activity; INVOLVED IN: carbohydrate metabolic process; LOCATED IN: endomembrane system; EXPRESSED IN: 14 plant structures; EXPRESSED DURING: 6 growth stages; CONTAINS InterPro DOMAIN/s: Pectin lyase fold/virulence factor (InterPro:IPR011050), Pectin lyase fold (InterPro:IPR012334), Glycoside hydrolase, family 28 (InterPro:IPR000743), Par…	PGA4	polygalacturonase 4	cell wall.degradation.pectate lyases and polygalacturonases				0	0	1	0	0	3	0	0	1	0	5	2	0	0	3	0	0	0	0	0.0220162	0	0	0.0816773	0	0	0.0342625	0	0.167764	0.0593081	0	0	0.101788	0	0	0.00733873	0.0272258	0.0114208	0.0756907	0.0339293	0	0.0127111
AT1G02800.1	Encodes a protein with similarity to endo-1,4-b-glucanases and is a member of Glycoside Hydrolase Family 9. CEL2 is induced by nemotodes and is expressed in syncitia induced by Heterodera schachtii.May be involved in the development and function of syncitia.	cellulase 2 (CEL2); FUNCTIONS IN: cellulase activity, hydrolase activity, hydrolyzing O-glycosyl compounds; INVOLVED IN: response to nematode, pattern specification process; LOCATED IN: endomembrane system; EXPRESSED IN: 11 plant structures; EXPRESSED DURING: 6 growth stages; CONTAINS InterPro DOMAIN/s: Six-hairpin glycosidase (InterPro:IPR012341), Glycoside hydrolase, family 9, active site (Inte…	CEL2	cellulase 2	misc.gluco-, galacto- and mannosidases.endoglucanase				61	22	24	28	33	28	8	0	1	25	8	18	8	10	3	23	27	1.45806	0.554739	0.493671	0.93797	1.10535	0.712073	0.226491	0	0.0320054	0.672702	0.250699	0.498617	0.296003	0.323936	0.0950861	0.570129	0.759203	0.83549	0.918464	0.0861655	0.474006	0.238342	0.664666	0.540025
AT1G02810.1		Plant invertase/pectin methylesterase inhibitor superfamily; FUNCTIONS IN: enzyme inhibitor activity, pectinesterase activity; INVOLVED IN: cell wall modification; LOCATED IN: endomembrane system, cell wall, plant-type cell wall; EXPRESSED IN: 14 plant structures; EXPRESSED DURING: 6 growth stages; CONTAINS InterPro DOMAIN/s: Pectinesterase, active site (InterPro:IPR018040), Pectin lyase fold/vir…	AT1G02810	Plant invertase/pectin methylesterase inhibitor superfamily	cell wall.pectin*esterases.PME				18	8	22	5	12	14	14	12	4	13	7	10	6	8	5	5	10	0.395434	0.185374	0.415922	0.153936	0.369335	0.327149	0.364312	0.291817	0.11764	0.321203	0.201535	0.254551	0.20396	0.238162	0.145632	0.113906	0.258325	0.332243	0.283473	0.257923	0.259096	0.195918	0.186115	0.127604
AT1G02813.1		Protein of unknown function, DUF538; INVOLVED IN: biological_process unknown; LOCATED IN: endomembrane system; EXPRESSED IN: leaf whorl, cauline leaf, sepal, flower, seed; EXPRESSED DURING: F mature embryo stage, petal differentiation and expansion stage, E expanded cotyledon stage; CONTAINS InterPro DOMAIN/s: Protein of unknown function DUF538 (InterPro:IPR007493); BEST Arabidopsis thaliana prot…	AT1G02813	pectinesterase (Protein of unknown function, DUF538)	not assigned.unknown				1	0	0	0	0	0	0	0	0	0	0	0	0	0	0	0	0	0.0836338	0	0	0	0	0	0	0	0	0	0	0	0	0	0	0	0	0.0278779	0	0	0	0	0	0.048286
AT1G02816.1		Protein of unknown function, DUF538; FUNCTIONS IN: molecular_function unknown; INVOLVED IN: biological_process unknown; LOCATED IN: plasma membrane, vacuole; EXPRESSED IN: 25 plant structures; EXPRESSED DURING: 14 growth stages; CONTAINS InterPro DOMAIN/s: Protein of unknown function DUF538 (InterPro:IPR007493); BEST Arabidopsis thaliana protein match is: Protein of unknown function, DUF538 (TAIR…	AT1G02816	pectinesterase (Protein of unknown function, DUF538)	not assigned.unknown				800	656	954	243	267	298	448	583	530	447	361	412	398	579	510	456	357	35.9487	31.1468	36.8861	15.3105	16.8573	14.2853	23.8289	29.0829	31.9574	22.8427	21.3564	21.4975	27.8015	35.2899	30.4385	21.2626	18.9597	34.6605	15.4844	28.2897	21.8989	31.1766	20.1111	3.07887
AT1G02820.1		Late embryogenesis abundant 3 (LEA3) family protein; FUNCTIONS IN: molecular_function unknown; INVOLVED IN: embryo development, response to stress; EXPRESSED IN: 16 plant structures; EXPRESSED DURING: 8 growth stages; CONTAINS InterPro DOMAIN/s: Late embryogenesis abundant protein, group 3 (InterPro:IPR004926); BEST Arabidopsis thaliana protein match is: senescence-associated gene 21 (TAIR:AT4G02…	LEA3	Late embryogenesis abundant 3 (LEA3) family protein	development.late embryogenesis abundant				3938	2815	6007	176	156	164	1737	2186	2055	484	573	624	2315	2108	2900	446	386	327.22	247.869	429.373	20.523	18.3	14.6081	170.64	202.615	229.992	46.5983	63.1614	60.4211	301.284	237.893	321.004	38.4972	38.2305	334.821	17.8104	201.082	56.7269	286.727	38.3638	90.9904
AT1G02830.1		Ribosomal L22e protein family; FUNCTIONS IN: structural constituent of ribosome; INVOLVED IN: translation; LOCATED IN: ribosome, cytosolic large ribosomal subunit; EXPRESSED IN: shoot apex, flower; EXPRESSED DURING: petal differentiation and expansion stage; CONTAINS InterPro DOMAIN/s: Ribosomal protein L22e (InterPro:IPR002671); BEST Arabidopsis thaliana protein match is: Ribosomal L22e protein …	AT1G02830	Ribosomal L22e protein family	protein.synthesis.ribosomal protein.eukaryotic.60S subunit.L22				1	2	1	0	0	0	1	1	1	1	0	0	0	0	2	0	0	0.165191	0.35236	0.142069	0	0	0	0.194944	0.186134	0.224291	0.19839	0	0	0	0	0.443296	0	0	0.219873	0	0.20179	0.06613	0.147765	0	0.115318
AT1G02840.1	SR34/SR1 is a plant homologue of the human general/alternative splicing factor SF2/ASF. Barta et al (2010) have proposed a nomenclature for Serine/Arginine-Rich Protein Splicing Factors (SR proteins): Plant Cell. 2010, 22:2926.	SR1; FUNCTIONS IN: RNA binding, nucleotide binding, nucleic acid binding; LOCATED IN: interchromatin granule, nuclear speck, nucleus; EXPRESSED IN: 25 plant structures; EXPRESSED DURING: 15 growth stages; CONTAINS InterPro DOMAIN/s: RNA recognition motif, RNP-1 (InterPro:IPR000504), Nucleotide-binding, alpha-beta plait (InterPro:IPR012677); BEST Arabidopsis thaliana protein match is: RNA-binding …	SR34	RNA-binding (RRM/RBD/RNP motifs) family protein	RNA.processing.splicing				1299.87	1269.79	1487.19	1303.59	1196.88	1689.9	1048.06	850.162	781.022	1485.96	1277.01	1324.09	816.631	970.144	1016.09	1516.28	1256.6	45.9784	47.4225	45.2658	64.6386	59.411	63.6892	43.8937	33.3435	37.0339	59.4974	59.3541	54.3353	44.8165	46.5267	47.7005	55.6385	52.4202	46.2222	62.5796	38.0904	57.7289	46.3479	54.0294	1.09883
AT1G02840.2	SR34/SR1 is a plant homologue of the human general/alternative splicing factor SF2/ASF. Barta et al (2010) have proposed a nomenclature for Serine/Arginine-Rich Protein Splicing Factors (SR proteins): Plant Cell. 2010, 22:2926.	SR1; FUNCTIONS IN: RNA binding, nucleotide binding, nucleic acid binding; LOCATED IN: interchromatin granule, nuclear speck, nucleus; EXPRESSED IN: 25 plant structures; EXPRESSED DURING: 15 growth stages; CONTAINS InterPro DOMAIN/s: RNA recognition motif, RNP-1 (InterPro:IPR000504), Nucleotide-binding, alpha-beta plait (InterPro:IPR012677); BEST Arabidopsis thaliana protein match is: RNA-binding …	SR34	RNA-binding (RRM/RBD/RNP motifs) family protein	RNA.processing.splicing				476.952	486.533	366.189	219.641	220.095	358.537	252.08	262.4	264.452	401.268	366.293	363.993	177.294	294.171	328.016	357.436	334.457	13.0975	14.0982	8.65345	8.45368	8.4734	10.4801	8.19821	7.98182	9.72734	12.4259	13.1967	11.5877	7.54182	10.9493	11.9475	10.1801	10.8129	11.9497	9.13573	8.63579	12.4034	10.1462	10.4965	2.89817
AT1G02840.3	SR34/SR1 is a plant homologue of the human general/alternative splicing factor SF2/ASF. Barta et al (2010) have proposed a nomenclature for Serine/Arginine-Rich Protein Splicing Factors (SR proteins): Plant Cell. 2010, 22:2926.	SR1; FUNCTIONS IN: RNA binding, nucleotide binding, nucleic acid binding; LOCATED IN: interchromatin granule, nuclear speck, nucleus; EXPRESSED IN: 25 plant structures; EXPRESSED DURING: 15 growth stages; CONTAINS InterPro DOMAIN/s: RNA recognition motif, RNP-1 (InterPro:IPR000504), Nucleotide-binding, alpha-beta plait (InterPro:IPR012677); BEST Arabidopsis thaliana protein match is: RNA-binding …	SR34	RNA-binding (RRM/RBD/RNP motifs) family protein	RNA.processing.splicing				534.178	406.68	544.616	398.77	302.026	440.566	291.857	304.437	269.526	492.768	404.698	460.918	230.075	278.685	216.893	556.279	373.947	18.9643	15.2443	16.6376	19.8459	15.0475	16.6656	12.2682	11.9842	12.8274	19.8041	18.8797	18.9841	12.6733	13.4146	10.2197	20.4874	15.6575	16.9487	17.1863	12.3599	19.2226	12.1025	18.0724	1.87942
AT1G02850.1		beta glucosidase 11 (BGLU11); FUNCTIONS IN: cation binding, hydrolase activity, hydrolyzing O-glycosyl compounds, catalytic activity; INVOLVED IN: carbohydrate metabolic process; LOCATED IN: endomembrane system; EXPRESSED IN: 24 plant structures; EXPRESSED DURING: 13 growth stages; CONTAINS InterPro DOMAIN/s: Glycoside hydrolase, family 1 (InterPro:IPR001360), Glycoside hydrolase, family 1, activ…	BGLU11	beta glucosidase 11	misc.gluco-, galacto- and mannosidases				204.279	194.848	130.99	133.407	99.6559	250.397	238.994	276.25	199.443	318.016	311.17	456.163	48.8757	187.914	114.639	240.537	158.99	5.25064	5.28401	2.89735	4.80586	3.5903	6.84917	7.27557	7.86358	6.86539	9.20981	10.4896	13.5903	1.94535	6.54626	3.90779	6.41198	4.80927	4.47733	5.08178	7.33485	11.0966	4.13313	5.61062	1.36841
AT1G02850.2		beta glucosidase 11 (BGLU11); FUNCTIONS IN: cation binding, hydrolase activity, hydrolyzing O-glycosyl compounds, catalytic activity; INVOLVED IN: carbohydrate metabolic process; LOCATED IN: endomembrane system; EXPRESSED IN: 24 plant structures; EXPRESSED DURING: 13 growth stages; CONTAINS InterPro DOMAIN/s: Glycoside hydrolase, family 1 (InterPro:IPR001360), Glycoside hydrolase, family 1, activ…	BGLU11	beta glucosidase 11	misc.gluco-, galacto- and mannosidases				16.5534	12.2266	32.0631	0	0	26.9434	44.3835	63.7262	33.3639	92.2263	97.4485	89.6899	0	81.3361	46.8585	63.1741	58.6781	0.403676	0.314551	0.672873	0	0	0.699114	1.28197	1.72078	1.08949	2.53245	3.11589	2.5349	0	2.68815	1.51531	1.59769	1.68352	0.4637	0.233038	1.36408	2.72775	1.40115	1.64061	0.18655
AT1G02850.3		beta glucosidase 11 (BGLU11); FUNCTIONS IN: cation binding, hydrolase activity, hydrolyzing O-glycosyl compounds, catalytic activity; INVOLVED IN: carbohydrate metabolic process; LOCATED IN: endomembrane system; EXPRESSED IN: 24 plant structures; EXPRESSED DURING: 13 growth stages; CONTAINS InterPro DOMAIN/s: Glycoside hydrolase, family 1 (InterPro:IPR001360), Glycoside hydrolase, family 1, activ…	BGLU11	beta glucosidase 11	misc.gluco-, galacto- and mannosidases				8.91795	0	9.60669	0	0	0	0	9.79223	0	0	0	0	0	21.5026	0	8.86414	8.23063	0.227853	0	0.211223	0	0	0	0	0.277073	0	0	0	0	0	0.7446	0	0.234881	0.247474	0.146359	0	0.0923577	0	0.2482	0.241177	0.127023
AT1G02850.4		beta glucosidase 11 (BGLU11); FUNCTIONS IN: cation binding, hydrolase activity, hydrolyzing O-glycosyl compounds, catalytic activity; INVOLVED IN: carbohydrate metabolic process; LOCATED IN: endomembrane system; EXPRESSED IN: 24 plant structures; EXPRESSED DURING: 13 growth stages; CONTAINS InterPro DOMAIN/s: Glycoside hydrolase, family 1 (InterPro:IPR001360), Glycoside hydrolase, family 1, activ…	BGLU11	beta glucosidase 11	misc.gluco-, galacto- and mannosidases				14.7717	18.7425	5.97625	12.9964	5.0002	0	9.88327	24.5783	12.5121	42.8365	34.7102	28.7892	0	0	10.4465	18.8871	11.4555	0.344537	0.461144	0.119955	0.424826	0.16342	0	0.273044	0.634687	0.390743	1.12444	1.06128	0.778149	0	0	0.32308	0.456841	0.314278	0.308545	0.196082	0.432825	0.987956	0.107693	0.385559	0.173419
AT1G02850.5		beta glucosidase 11 (BGLU11); FUNCTIONS IN: cation binding, hydrolase activity, hydrolyzing O-glycosyl compounds, catalytic activity; INVOLVED IN: carbohydrate metabolic process; LOCATED IN: endomembrane system; EXPRESSED IN: 24 plant structures; EXPRESSED DURING: 13 growth stages; CONTAINS InterPro DOMAIN/s: Glycoside hydrolase, family 1 (InterPro:IPR001360), Glycoside hydrolase, family 1, activ…	BGLU11	beta glucosidase 11	misc.gluco-, galacto- and mannosidases				99.4776	189.183	89.3645	43.5963	26.3439	107.66	143.74	164.653	143.681	263.921	264.672	438.358	31.1243	135.247	146.056	136.538	147.646	2.32445	4.66316	1.79698	1.42766	0.862556	2.67634	3.97829	4.25961	4.49521	6.94057	8.10726	11.87	1.12566	4.2828	4.52531	3.30858	4.05803	2.9282	1.65552	4.24437	8.97261	3.31126	3.6833	1.52549
AT1G02860.1	Encodes a ubiquitin E3 ligase with RING and SPX domains that is involved in mediating immune responses and mediates degradation of PHT1s at plasma membranes. Targeted by MIR827. Ubiquitinates PHT1;3, PHT1;2, PHT1;1/AtPT1 and PHT1;4/AtPT2.	nitrogen limitation adaptation (NLA); CONTAINS InterPro DOMAIN/s: Zinc finger, RING-type, conserved site (InterPro:IPR017907), Zinc finger, RING-type (InterPro:IPR001841), SPX, N-terminal (InterPro:IPR004331); BEST Arabidopsis thaliana protein match is: SPX (SYG1/Pho81/XPR1) domain-containing protein / zinc finger (C3HC4-type RING finger) protein-related (TAIR:AT2G38920.1); Has 2026 Blast hits to…	NLA	SPX (SYG1/Pho81/XPR1) domain-containing protein	protein.degradation.ubiquitin.E3.RING				238	208	208	156	142	149	161	147	180	237.366	222	207	201	175	202	307	248	6.71747	6.19521	5.05198	6.17137	5.61944	4.47687	5.38162	4.59635	6.80565	7.55766	8.22187	6.77366	8.78944	6.69508	7.56269	8.98712	8.24221	5.98822	5.42256	5.59454	7.51773	7.6824	8.61467	0.85182
AT1G02860.2	Encodes a ubiquitin E3 ligase with RING and SPX domains that is involved in mediating immune responses and mediates degradation of PHT1s at plasma membranes. Targeted by MIR827. Ubiquitinates PHT1;3, PHT1;2, PHT1;1/AtPT1 and PHT1;4/AtPT2.	nitrogen limitation adaptation (NLA); CONTAINS InterPro DOMAIN/s: Zinc finger, RING-type, conserved site (InterPro:IPR017907), Zinc finger, RING-type (InterPro:IPR001841), SPX, N-terminal (InterPro:IPR004331); BEST Arabidopsis thaliana protein match is: SPX (SYG1/Pho81/XPR1) domain-containing protein / zinc finger (C3HC4-type RING finger) protein-related (TAIR:AT2G38920.2); Has 30201 Blast hits t…	NLA	SPX (SYG1/Pho81/XPR1) domain-containing protein	protein.degradation.ubiquitin.E3.RING				0	0	0	0	0	0	0	0	0	5.63402	0	0	0	0	0	0	0	0	0	0	0	0	0	0	0	0	0.180188	0	0	0	0	0	0	0	0	0	0	0.0600627	0	0	0
AT1G02870.1		FUNCTIONS IN: molecular_function unknown; INVOLVED IN: biological_process unknown; EXPRESSED IN: 23 plant structures; EXPRESSED DURING: 13 growth stages; CONTAINS InterPro DOMAIN/s: Ribosome biogenesis protein Nop16 (InterPro:IPR019002); Has 104 Blast hits to 104 proteins in 57 species: Archae - 0; Bacteria - 0; Metazoa - 0; Fungi - 63; Plants - 35; Viruses - 0; Other Eukaryotes - 6 (source: NCBI…	AT1G02870	nucleolar-like protein	not assigned.unknown				427	486	411	426	349	509	312	386	358	544	441	544	185	255	449	571	527	23.7905	28.6341	19.7019	33.2874	27.3571	30.2946	20.5691	23.907	26.7938	34.6495	32.417	35.2295	16.0558	19.2788	33.254	33.022	34.7851	24.0422	30.313	23.7566	34.0987	22.8629	33.9036	4.47141
AT1G02880.1	Encodes a thiamine pyrophosphokinase capable of producing thiamine pyrophosphate from free thiamine.	thiamin pyrophosphokinase1 (TPK1); FUNCTIONS IN: thiamin diphosphokinase activity; INVOLVED IN: thiamin metabolic process; LOCATED IN: cytosol; EXPRESSED IN: 6 plant structures; CONTAINS InterPro DOMAIN/s: Thiamin pyrophosphokinase, vitamin B1-binding domain (InterPro:IPR007373), Thiamin pyrophosphokinase (InterPro:IPR006282), Thiamin pyrophosphokinase, catalytic domain (InterPro:IPR007371); BEST…	TPK1	thiamin pyrophosphokinase1	Co-factor and vitamine metabolism.thiamine.thiamine diphosphokinase				76.7418	131.088	109.226	62.8782	88.2391	206.749	75.8834	43.9016	52.585	113.821	114.711	194.197	59.5336	79.2397	73.3127	126.782	154.232	2.44527	4.409	2.99489	2.80839	3.94392	7.01612	2.86319	1.55038	2.24535	4.09844	4.79954	7.17642	2.9411	3.42286	3.09951	4.19033	5.79135	3.28305	4.58948	2.21964	5.35813	3.15449	4.99084	1.01308
AT1G02880.2	Encodes a thiamine pyrophosphokinase capable of producing thiamine pyrophosphate from free thiamine.	thiamin pyrophosphokinase1 (TPK1); FUNCTIONS IN: thiamin diphosphokinase activity; INVOLVED IN: thiamin metabolic process; LOCATED IN: cytosol; EXPRESSED IN: 6 plant structures; CONTAINS InterPro DOMAIN/s: Thiamin pyrophosphokinase, vitamin B1-binding domain (InterPro:IPR007373), Thiamin pyrophosphokinase, eukaryotic (InterPro:IPR016966), Thiamin pyrophosphokinase (InterPro:IPR006282), Thiamin py…	TPK1	thiamin pyrophosphokinase1	Co-factor and vitamine metabolism.thiamine.thiamine diphosphokinase				0	0	0	0	0	0	0	0	0	0	0	0	0	0	0	0	0	0	0	0	0	0	0	0	0	0	0	0	0	0	0	0	0	0	0	0	0	0	0	0	0
AT1G02880.3	Encodes a thiamine pyrophosphokinase capable of producing thiamine pyrophosphate from free thiamine.	thiamin pyrophosphokinase1 (TPK1); FUNCTIONS IN: thiamin diphosphokinase activity; INVOLVED IN: thiamin metabolic process; LOCATED IN: cytosol; EXPRESSED IN: 6 plant structures; CONTAINS InterPro DOMAIN/s: Thiamin pyrophosphokinase, vitamin B1-binding domain (InterPro:IPR007373), Thiamin pyrophosphokinase, eukaryotic (InterPro:IPR016966), Thiamin pyrophosphokinase (InterPro:IPR006282), Thiamin py…	TPK1	thiamin pyrophosphokinase1	Co-factor and vitamine metabolism.thiamine.thiamine diphosphokinase				278.866	300.135	229.135	245.416	161.331	398.353	180.1	205.323	180.275	320.744	282.579	297.927	89.2137	188.074	176.368	344.424	310.766	10.5616	12.0041	7.46732	13.0304	8.57728	16.0802	8.0756	8.62503	9.15502	13.7674	14.0699	13.0935	5.24494	9.65867	8.86692	13.5331	13.8885	10.011	12.5626	8.61855	13.6436	7.92351	13.7108	2.31796
AT1G02880.4	Encodes a thiamine pyrophosphokinase capable of producing thiamine pyrophosphate from free thiamine.	thiamin pyrophosphokinase1 (TPK1); FUNCTIONS IN: thiamin diphosphokinase activity; INVOLVED IN: thiamin metabolic process; LOCATED IN: cytosol; EXPRESSED IN: 6 plant structures; CONTAINS InterPro DOMAIN/s: Thiamin pyrophosphokinase, vitamin B1-binding domain (InterPro:IPR007373), Thiamin pyrophosphokinase (InterPro:IPR006282), Thiamin pyrophosphokinase, catalytic domain (InterPro:IPR007371); BEST…	TPK1	thiamin pyrophosphokinase1	Co-factor and vitamine metabolism.thiamine.thiamine diphosphokinase				188.392	360.778	299.639	210.706	203.43	355.898	192.79	130.776	79.1404	237.434	259.71	363.876	160.253	191.459	170.32	249.794	227.003	7.14905	14.4581	9.78422	11.2095	10.8369	14.3948	8.66161	5.50438	4.02698	10.2119	12.9569	16.0234	9.44005	9.85189	8.57975	9.83427	10.1652	10.4638	12.1471	6.06432	13.0641	9.29056	9.99973	3.70161
AT1G02890.1		AAA-type ATPase family protein; FUNCTIONS IN: nucleoside-triphosphatase activity, ATPase activity, nucleotide binding, ATP binding; LOCATED IN: chloroplast; EXPRESSED IN: 25 plant structures; EXPRESSED DURING: 15 growth stages; CONTAINS InterPro DOMAIN/s: ATPase, AAA+ type, core (InterPro:IPR003593), ATPase, AAA-type, core (InterPro:IPR003959), ATPase, AAA-type, conserved site (InterPro:IPR003960…	AT1G02890	AAA-type ATPase family protein	protein.degradation.AAA type				1754	1818	2121	1493.87	1588	2289.27	1278.36	1014.5	1128	2074	1894	1878	1125	1280.06	1242	2015.12	1872	16.9912	18.5584	17.6831	20.2748	21.5188	23.5523	14.6744	10.862	14.6103	22.464	23.9868	21.0557	16.8219	16.7956	15.9364	20.2358	21.2662	17.7442	21.782	13.3822	22.5022	16.518	20.751	0.785386
AT1G02890.2		AAA-type ATPase family protein; FUNCTIONS IN: nucleoside-triphosphatase activity, ATPase activity, nucleotide binding, ATP binding; LOCATED IN: chloroplast; EXPRESSED IN: 25 plant structures; EXPRESSED DURING: 15 growth stages; CONTAINS InterPro DOMAIN/s: ATPase, AAA+ type, core (InterPro:IPR003593), ATPase, AAA-type, core (InterPro:IPR003959), ATPase, AAA-type, conserved site (InterPro:IPR003960…	AT1G02890	AAA-type ATPase family protein	protein.degradation.AAA type				0	0	0	23.1265	0	27.7296	12.6368	10.5016	0	0	0	0	0	11.9367	0	36.8802	0	0	0	0	0.320641	0	0.291445	0.148185	0.114865	0	0	0	0	0	0.159999	0	0.378339	0	0	0.204029	0.0876833	0	0.053333	0.189169	0
AT1G02900.1	Member of a diversely expressed predicted peptide family showing sequence similarity to tobacco Rapid Alkalinization Factor (RALF), and is believed to play an essential role in the physiology of Arabidopsis. Consists of a single exon and is characterized by a conserved C-terminal motif and N-terminal signal peptide. Mediates Ca2+-dependent signaling.	rapid alkalinization factor 1 (RALF1); CONTAINS InterPro DOMAIN/s: Rapid ALkalinization Factor (InterPro:IPR008801); BEST Arabidopsis thaliana protein match is: ralf-like 33 (TAIR:AT4G15800.1); Has 267 Blast hits to 267 proteins in 20 species: Archae - 0; Bacteria - 0; Metazoa - 0; Fungi - 2; Plants - 265; Viruses - 0; Other Eukaryotes - 0 (source: NCBI BLink).	RALF1	rapid alkalinization factor 1	signalling.misc				12	23	14	19	20	31	29	15	10	26	12	24	20	9	23	23	28	1.08087	2.19674	1.08482	2.40228	2.54573	2.9959	3.08787	1.50843	1.21417	2.72289	1.43602	2.521	2.82578	1.10139	2.76154	2.15269	3.01116	1.45414	2.64797	1.93682	2.22664	2.22957	2.58193	0.643111
AT1G02910.1	Mutants defective in this gene were shown to have a reduced PSII content (overall reduction in the levels of several PSII subunits) and a disrupted grana stack structure. The N-terminal half of the protein contains two tetratricopeptide repeat (TPR) motifs that are arranged tandemly, each consisting of a 34-residue degenerate consensus sequence. The N-terminal sequence is rich in positive and hyd…	LOW PSII ACCUMULATION1 (LPA1); FUNCTIONS IN: binding; INVOLVED IN: photosystem II oxygen evolving complex assembly; LOCATED IN: chloroplast; EXPRESSED IN: 22 plant structures; EXPRESSED DURING: 13 growth stages; CONTAINS InterPro DOMAIN/s: Protein of unknown function DUF3493 (InterPro:IPR021883), Tetratricopeptide-like helical (InterPro:IPR011990), Tetratricopeptide repeat-containing (InterPro:IP…	LPA1	tetratricopeptide repeat (TPR)-containing protein	not assigned.no ontology.pentatricopeptide (PPR) repeat-containing protein				1773	1770	2605	1614	1779	2211	1238	1425	1439	1798	1609	1929	1308	1520	1575	2329	1748	48.6186	51.2159	61.4715	62.0323	68.3916	64.5354	40.2054	43.2845	52.8553	55.5976	57.8855	61.3222	55.5608	56.4953	57.2854	66.238	56.4316	53.7687	64.9864	45.4484	58.2684	56.4472	61.3348	6.79608
AT1G02920.1	Encodes glutathione transferase belonging to the phi class of GSTs. Naming convention according to Wagner et al. (2002).	glutathione S-transferase 7 (GSTF7); FUNCTIONS IN: glutathione transferase activity, copper ion binding, cobalt ion binding, glutathione binding; INVOLVED IN: defense response to fungus, incompatible interaction, response to cadmium ion, response to salt stress, defense response to bacterium, toxin catabolic process; LOCATED IN: nucleus, vacuole, cytoplasm; EXPRESSED IN: root, cultured cell, leaf…	GSTF7	glutathione S-transferase 7	misc.glutathione S transferases				1904.11	5383.18	1342.24	1966.6	2645.6	3666.4	7302.9	7307.77	4610.86	12189.7	6682.44	7434.89	1144.19	6161.04	2816.26	4033.54	2223.03	94.8487	283.437	57.5278	137.371	185.273	194.952	430.528	404.358	308.346	692.165	438.656	430.238	88.6771	416.348	186.396	208.519	131.016	145.271	172.532	381.077	520.353	230.474	169.768	121.101
AT1G02930.1	Encodes glutathione transferase belonging to the phi class of GSTs. Naming convention according to Wagner et al. (2002).	glutathione S-transferase 6 (GSTF6); FUNCTIONS IN: glutathione transferase activity, copper ion binding, cobalt ion binding, glutathione binding; INVOLVED IN: in 7 processes; LOCATED IN: mitochondrion, cell wall, vacuole, cytoplasm; EXPRESSED IN: fruit, root, cultured cell, leaf; EXPRESSED DURING: seedling growth, seed development stages; CONTAINS InterPro DOMAIN/s: Thioredoxin fold (InterPro:IPR…	GSTF6	glutathione S-transferase 6	misc.glutathione S transferases				3563.25	6040.38	2248.08	3524.79	3353.15	6325.14	7316.42	8365.75	4182.28	11719.6	7191.35	10523	1158.39	5834.64	3599.61	4940.32	3801.18	152.986	273.979	83.0506	212.182	202.224	289.629	371.845	398.635	240.897	571.666	406.321	524.517	77.2814	339.751	205.235	220.086	192.796	170.005	234.678	337.126	500.835	207.422	206.441	96.5953
AT1G02930.2	Encodes glutathione transferase belonging to the phi class of GSTs. Naming convention according to Wagner et al. (2002).	glutathione S-transferase 6 (GSTF6); FUNCTIONS IN: glutathione transferase activity, cobalt ion binding; INVOLVED IN: response to oxidative stress, response to water deprivation, toxin catabolic process, response to stress; LOCATED IN: mitochondrion, cytoplasm; EXPRESSED DURING: seed development stages; CONTAINS InterPro DOMAIN/s: Thioredoxin fold (InterPro:IPR012335), Glutathione S-transferase, …	GSTF6	glutathione S-transferase 6	misc.glutathione S transferases				3321.64	4691.44	1937.68	2875.6	2922.24	4929.46	7186.68	5812.48	4175.86	10538.6	6497.2	6712.12	919.425	4939.32	2451.13	3248.14	2417.8	179.113	267.482	89.8985	217.461	221.647	283.889	458.578	348.338	302.426	649.088	462.067	420.625	77.2006	361.39	175.673	181.794	154.394	178.831	240.999	369.781	510.593	204.755	168.094	88.7921
AT1G02940.1	Encodes glutathione transferase belonging to the phi class of GSTs. Naming convention according to Wagner et al. (2002).	glutathione S-transferase (class phi) 5 (GSTF5); FUNCTIONS IN: glutathione transferase activity; INVOLVED IN: N-terminal protein myristoylation, toxin catabolic process; LOCATED IN: mitochondrion, cytoplasm; EXPRESSED IN: 13 plant structures; EXPRESSED DURING: 9 growth stages; CONTAINS InterPro DOMAIN/s: Thioredoxin fold (InterPro:IPR012335), Glutathione S-transferase, C-terminal (InterPro:IPR004…	GSTF5	glutathione S-transferase (class phi) 5	misc.glutathione S transferases				20	27	20	30	14	50	13	15	7	20	27	30	4	16	19	10	29	1.24371	1.7764	1.07002	2.6168	1.22586	3.32422	0.956383	1.03776	0.585126	1.42631	2.21805	2.16972	0.387967	1.35048	1.57139	0.645597	2.13954	1.36338	2.38896	0.859756	1.93803	1.10328	1.39257	0.368081
AT1G02950.1	Encodes glutathione transferase belonging to the phi class of GSTs. Naming convention according to Wagner et al. (2002).	glutathione S-transferase F4 (GSTF4); CONTAINS InterPro DOMAIN/s: Thioredoxin fold (InterPro:IPR012335), Glutathione S-transferase, C-terminal (InterPro:IPR004046), Glutathione S-transferase, C-terminal-like (InterPro:IPR010987), Glutathione S-transferase/chloride channel, C-terminal (InterPro:IPR017933), Glutathione S-transferase, N-terminal (InterPro:IPR004045), Thioredoxin-like fold (InterPro:…	GSTF4	glutathione S-transferase F4	misc.glutathione S transferases				133.021	52.5619	197.12	90.8614	78.8883	123.801	86.8859	48.4341	40	44.8982	76.0941	64.4443	90	68.0931	61.1108	94.255	103.522	6.81999	2.84878	8.69554	6.53273	5.68726	6.77666	5.2718	2.75889	2.75362	2.62588	5.14267	3.83884	7.18134	4.73646	4.16346	5.01539	6.28169	6.12144	6.33222	3.59477	3.86913	5.36042	5.64854	2.98532
AT1G02950.2	Encodes glutathione transferase belonging to the phi class of GSTs. Naming convention according to Wagner et al. (2002).	glutathione S-transferase F4 (GSTF4); CONTAINS InterPro DOMAIN/s: Thioredoxin fold (InterPro:IPR012335), Glutathione S-transferase, C-terminal (InterPro:IPR004046), Glutathione S-transferase, C-terminal-like (InterPro:IPR010987), Glutathione S-transferase/chloride channel, C-terminal (InterPro:IPR017933), Glutathione S-transferase, N-terminal (InterPro:IPR004045), Thioredoxin-like fold (InterPro:…	GSTF4	glutathione S-transferase F4	misc.glutathione S transferases				6.97878	35.4381	5.88025	7.13862	9.11167	43.1646	8.11413	11.5659	0	6.10182	7.90585	8.55573	0	5.90695	12.8892	8.74498	7.47763	0.354502	1.90292	0.257004	0.508512	0.650787	2.34082	0.487791	0.652701	0	0.353493	0.529324	0.504929	0	0.407082	0.870004	0.46103	0.449507	0.838142	1.16671	0.380164	0.462582	0.425695	0.455269	0.923412
AT1G02950.3	Encodes glutathione transferase belonging to the phi class of GSTs. Naming convention according to Wagner et al. (2002).	glutathione S-transferase F4 (GSTF4); CONTAINS InterPro DOMAIN/s: Thioredoxin fold (InterPro:IPR012335), Glutathione S-transferase, C-terminal (InterPro:IPR004046), Glutathione S-transferase, C-terminal-like (InterPro:IPR010987), Glutathione S-transferase/chloride channel, C-terminal (InterPro:IPR017933), Glutathione S-transferase, N-terminal (InterPro:IPR004045), Thioredoxin-like fold (InterPro:…	GSTF4	glutathione S-transferase F4	misc.glutathione S transferases				0	0	0	0	0	0	0	0	0	0	0	0	0	0	0	0	0	0	0	0	0	0	0	0	0	0	0	0	0	0	0	0	0	0	0	0	0	0	0	0	0
AT1G02950.4	Encodes glutathione transferase belonging to the phi class of GSTs. Naming convention according to Wagner et al. (2002).	glutathione S-transferase F4 (GSTF4); CONTAINS InterPro DOMAIN/s: Glutathione S-transferase, C-terminal (InterPro:IPR004046), Glutathione S-transferase, C-terminal-like (InterPro:IPR010987), Glutathione S-transferase/chloride channel, C-terminal (InterPro:IPR017933); BEST Arabidopsis thaliana protein match is: glutathione S-transferase (class phi) 5 (TAIR:AT1G02940.1); Has 30201 Blast hits to 173…	GSTF4	glutathione S-transferase F4	misc.glutathione S transferases				0	0	0	0	0	0	0	0	0	0	0	0	0	0	0	0	0	0	0	0	0	0	0	0	0	0	0	0	0	0	0	0	0	0	0	0	0	0	0	0	0
AT1G02952.1	Potential natural antisense gene, locus overlaps with AT1G02950		AT1G02952	Natural antisense transcript overlaps with AT1G02950	micro RNA, natural antisense etc				0	0	0	0	0	1.03424	0	0	0	0	0	0	0	0	0	0	2	0	0	0	0	0	0.158797	0	0	0	0	0	0	0	0	0	0	0.34321	0	0.0529323	0	0	0	0.171605	0
AT1G02960.1		unknown protein; BEST Arabidopsis thaliana protein match is: unknown protein (TAIR:AT1G02965.1); Has 83 Blast hits to 82 proteins in 37 species: Archae - 0; Bacteria - 2; Metazoa - 20; Fungi - 7; Plants - 29; Viruses - 0; Other Eukaryotes - 25 (source: NCBI BLink).	AT1G02960	kinetochore protein	not assigned.unknown				55.5773	51.3122	48.5161	39.58	26.629	34.6404	8.58361	25.6587	30.9044	35.9721	28.1077	16.7213	33.4568	15.4643	33.3494	95.257	21.8491	1.49635	1.45773	1.12408	1.49358	1.00507	0.992676	0.273705	0.765189	1.11447	1.09187	0.992748	0.521889	1.39522	0.564329	1.1909	2.65993	0.692482	1.35939	1.16378	0.717788	0.868836	1.05015	1.67621	0.204694
AT1G02960.2		unknown protein; BEST Arabidopsis thaliana protein match is: unknown protein (TAIR:AT1G02965.1); Has 100 Blast hits to 99 proteins in 48 species: Archae - 0; Bacteria - 4; Metazoa - 26; Fungi - 13; Plants - 29; Viruses - 0; Other Eukaryotes - 28 (source: NCBI BLink).	AT1G02960	kinetochore protein	not assigned.unknown				238.878	256.526	343.084	217.651	207.156	369.269	209.747	162.515	178.262	253.086	225.847	322.023	176.891	198.063	194.38	335.611	350.488	6.31247	7.15254	7.80187	8.06111	7.67361	10.3855	6.56452	4.75649	6.30916	7.538	7.82839	9.86421	7.23953	7.09389	6.81258	9.19797	10.9016	7.08896	8.70674	5.87672	8.4102	7.04867	10.0498	0.746733
AT1G02960.3		unknown protein; LOCATED IN: cellular_component unknown; EXPRESSED IN: 23 plant structures; EXPRESSED DURING: 13 growth stages; BEST Arabidopsis thaliana protein match is: unknown protein (TAIR:AT1G02965.1); Has 35333 Blast hits to 34131 proteins in 2444 species: Archae - 798; Bacteria - 22429; Metazoa - 974; Fungi - 991; Plants - 531; Viruses - 0; Other Eukaryotes - 9610 (source: NCBI BLink).	AT1G02960	kinetochore protein	not assigned.unknown				174.545	127.162	168.4	101.769	80.2151	101.091	94.6691	97.8265	96.8339	97.942	130.045	119.256	52.652	107.473	87.2704	102.132	79.6627	4.51346	3.46931	3.74732	3.68827	2.90741	2.78191	2.89935	2.80154	3.35347	2.85375	4.41044	3.57446	2.10837	3.7666	2.99285	2.73896	2.42434	3.91003	3.12586	3.01812	3.61288	2.95594	2.58165	0.540757
AT1G02965.1		unknown protein; BEST Arabidopsis thaliana protein match is: unknown protein (TAIR:AT1G02960.3); Has 8 Blast hits to 8 proteins in 2 species: Archae - 0; Bacteria - 0; Metazoa - 0; Fungi - 0; Plants - 8; Viruses - 0; Other Eukaryotes - 0 (source: NCBI BLink).	AT1G02965	hypothetical protein	not assigned.unknown				0	0	0	0	0	0	0	0	0	0	0	0	0	0	0	0	0	0	0	0	0	0	0	0	0	0	0	0	0	0	0	0	0	0	0	0	0	0	0	0	0
AT1G02970.1	Protein kinase that negatively regulates the entry into mitosis.	WEE1 kinase homolog (WEE1); CONTAINS InterPro DOMAIN/s: Protein kinase, ATP binding site (InterPro:IPR017441), Protein kinase, catalytic domain (InterPro:IPR000719), Serine/threonine-protein kinase-like domain (InterPro:IPR017442), Protein kinase-like domain (InterPro:IPR011009), Serine/threonine-protein kinase, active site (InterPro:IPR008271); BEST Arabidopsis thaliana protein match is: Protein…	WEE1	WEE1-like kinase	protein.postranslational modification				111	94	130	88	85	105	83	56	69	92	89	110	70	66	71	102	71	2.51002	2.24213	2.52979	2.78876	2.69306	2.52578	2.22314	1.40186	2.08894	2.34052	2.63786	2.88234	2.44963	2.02251	2.12873	2.39188	1.88816	2.42731	2.6692	1.90465	2.62024	2.20029	2.14002	0.160678
AT1G02980.1	encodes an Arabidopsis cullin	cullin 2 (CUL2); FUNCTIONS IN: ubiquitin protein ligase binding; INVOLVED IN: cell cycle, ubiquitin-dependent protein catabolic process; LOCATED IN: SCF ubiquitin ligase complex, chloroplast envelope; EXPRESSED IN: sperm cell, flower; EXPRESSED DURING: petal differentiation and expansion stage; CONTAINS InterPro DOMAIN/s: Winged helix-turn-helix transcription repressor DNA-binding (InterPro:IPR01…	CUL2	cullin 2	protein.degradation.ubiquitin.E3.SCF.cullin				0	0	0	0	0	0	1	0	0	0	3	0	0	0	0	0	0	0	0	0	0	0	0	0.0209904	0	0	0	0.0696029	0	0	0	0	0	0	0	0	0.0069968	0.023201	0	0	0
AT1G02990.1		BEST Arabidopsis thaliana protein match is: CW-type Zinc Finger (TAIR:AT3G62900.1); Has 5847 Blast hits to 4410 proteins in 438 species: Archae - 17; Bacteria - 452; Metazoa - 2463; Fungi - 354; Plants - 306; Viruses - 11; Other Eukaryotes - 2244 (source: NCBI BLink).	AT1G02990	hypothetical protein	not assigned.unknown				0	15.4128	0	0	22.5161	0	0	8.81494	24.6639	24.2726	11.6011	0	0	12.83	13.8625	28.0696	10.9281	0	0.146472	0	0	0.284035	0	0	0.0878592	0.297393	0.244683	0.136768	0	0	0.156721	0.165589	0.262419	0.115561	0.048824	0.0946783	0.128417	0.12715	0.107437	0.18899	0.0845656
AT1G02990.2		BEST Arabidopsis thaliana protein match is: CW-type Zinc Finger (TAIR:AT3G62900.1); Has 35333 Blast hits to 34131 proteins in 2444 species: Archae - 798; Bacteria - 22429; Metazoa - 974; Fungi - 991; Plants - 531; Viruses - 0; Other Eukaryotes - 9610 (source: NCBI BLink).	AT1G02990	hypothetical protein	not assigned.unknown				8.30877e-07	1.93234e-08	0	1.17682e-05	0	0	0	0	0	0	0	0	1.11658e-06	0	3.06698e-05	0	0	7.59107e-09	1.8603e-10	0	1.50632e-07	0	0	0	0	0	0	0	0	1.57447e-08	0	3.71135e-07	0	0	2.59237e-09	5.02107e-08	0	0	1.2896e-07	0	4.33e-09
AT1G02990.3		FUNCTIONS IN: molecular_function unknown; INVOLVED IN: biological_process unknown; LOCATED IN: cellular_component unknown; BEST Arabidopsis thaliana protein match is: CW-type Zinc Finger (TAIR:AT3G62900.1).	AT1G02990	hypothetical protein	not assigned.unknown				711	752.587	809	571	546.484	859	540	386.185	423.336	914.727	802.399	840	396	576.17	469.138	869.93	774.072	6.48355	7.23158	6.34916	7.29494	6.97047	8.31854	5.83518	3.89198	5.1613	9.32397	9.56495	8.86498	5.57335	7.11627	5.66627	8.2233	8.27675	6.6881	7.52798	4.96282	9.2513	6.11863	8.25003	0.475443
AT1G03000.1	Encodes an apparent ATPase similar to yeast and human protein required for peroxisomal biogenesis. May facilitate recycling of PEX5, the peroxisomal matrix protein receptor, and thereby promote peroxisomal matrix protein import.	peroxin 6 (PEX6); FUNCTIONS IN: nucleoside-triphosphatase activity, ATPase activity, nucleotide binding, ATP binding; INVOLVED IN: protein import into peroxisome matrix, fatty acid beta-oxidation; EXPRESSED IN: 22 plant structures; EXPRESSED DURING: 13 growth stages; CONTAINS InterPro DOMAIN/s: ATPase, AAA-type, core (InterPro:IPR003959), ATPase, AAA+ type, core (InterPro:IPR003593), ATPase, AAA-…	PEX6	peroxin 6	protein.degradation.AAA type				599	596	688	521	523	754	398	365	395	673	579	550	342	395	432	713	618	7.83124	8.21322	7.74115	9.54382	9.56887	10.4738	6.16525	5.27645	6.90725	9.85381	9.90308	8.32493	6.90638	6.99565	7.48297	9.66407	9.48211	7.92854	9.86216	6.11632	9.36061	7.12833	9.57309	0.250624
AT1G03010.1		Phototropic-responsive NPH3 family protein; FUNCTIONS IN: signal transducer activity; INVOLVED IN: response to light stimulus, pollen tube growth; EXPRESSED IN: leaf apex, inflorescence meristem, cauline leaf, root, flower; EXPRESSED DURING: M germinated pollen stage, petal differentiation and expansion stage; CONTAINS InterPro DOMAIN/s: NPH3 (InterPro:IPR004249), BTB/POZ fold (InterPro:IPR011333…	AT1G03010	Phototropic-responsive NPH3 family protein	signalling.light				70	50	57	63	44	63	8	10	13	27	48	13	29	25	34	123	85	1.38544	1.04363	0.970864	1.74734	1.21972	1.32595	0.187565	0.219028	0.344375	0.600392	1.2445	0.29807	0.887752	0.67046	0.892034	2.52432	1.97726	1.13331	1.431	0.250323	0.714321	0.816749	2.25079	0.22136
AT1G03020.1		Thioredoxin superfamily protein; FUNCTIONS IN: electron carrier activity, arsenate reductase (glutaredoxin) activity, protein disulfide oxidoreductase activity; INVOLVED IN: cell redox homeostasis; LOCATED IN: cellular_component unknown; EXPRESSED IN: 7 plant structures; EXPRESSED DURING: 6 growth stages; CONTAINS InterPro DOMAIN/s: Glutaredoxin-like, plant II (InterPro:IPR011905), Thioredoxin fo…	AT1G03020	Thioredoxin superfamily protein	redox.glutaredoxins				19	33	57	13	13	6	37	52	70	33	13	26	23	49	38	18	6	4.58841	8.54581	11.8473	4.43717	4.51169	1.58471	10.5372	14.2559	23.1195	9.83473	4.28042	7.4224	8.9843	16.1773	12.402	4.54083	1.77694	8.32717	3.51119	15.9709	7.17918	12.5212	3.15889	3.63438
AT1G03022.1		unknown protein; Has 30201 Blast hits to 17322 proteins in 780 species: Archae - 12; Bacteria - 1396; Metazoa - 17338; Fungi - 3422; Plants - 5037; Viruses - 0; Other Eukaryotes - 2996 (source: NCBI BLink).			not assigned.unknown				0	0	0	0	0	0	0	0	0	0	0	0	0	0	0	0	0	0	0	0	0	0	0	0	0	0	0	0	0	0	0	0	0	0	0	0	0	0	0	0	0
AT1G03030.1		P-loop containing nucleoside triphosphate hydrolases superfamily protein; FUNCTIONS IN: phosphotransferase activity, alcohol group as acceptor, kinase activity, ATP binding; INVOLVED IN: biosynthetic process, metabolic process; LOCATED IN: chloroplast; EXPRESSED IN: 22 plant structures; EXPRESSED DURING: 13 growth stages; CONTAINS InterPro DOMAIN/s: Phosphoribulokinase/uridine kinase (InterPro:IP…	AT1G03030	P-loop containing nucleoside triphosphate hydrolases superfamily protein	nucleotide metabolism.salvage.nucleoside kinases.uridine kinase				445	483	570	388	391	530	440	388	370	559	542	595	313	416	373	566	502	14.3693	16.4634	15.8383	17.562	17.7112	18.2278	16.8241	13.8866	16.0112	20.4022	22.9833	22.2833	15.6715	18.2108	15.9815	18.9581	19.1044	15.557	17.8337	15.574	21.8896	16.6213	19.0312	1.07502
AT1G03040.1		basic helix-loop-helix (bHLH) DNA-binding superfamily protein; FUNCTIONS IN: DNA binding, sequence-specific DNA binding transcription factor activity; INVOLVED IN: regulation of transcription, acetyl-CoA biosynthetic process from pyruvate; LOCATED IN: nucleus; EXPRESSED IN: 22 plant structures; EXPRESSED DURING: 13 growth stages; CONTAINS InterPro DOMAIN/s: Helix-loop-helix DNA-binding domain (In…	AT1G03040	basic helix-loop-helix (bHLH) DNA-binding superfamily protein	RNA.regulation of transcription.bHLH,Basic Helix-Loop-Helix family				922.67	908.393	938.698	820.428	810.6	1049.5	796.773	687.298	604.173	1178.35	996.392	1099.63	594.89	752.663	675.079	1137.31	1020.12	27.2593	28.3237	23.865	33.9743	33.5833	33.0128	27.8769	22.4985	23.9142	39.2969	38.6368	37.6696	27.2368	30.1426	26.4585	34.8513	35.4986	26.4827	33.5235	24.7632	38.5344	27.946	35.175	2.3286
AT1G03040.2		basic helix-loop-helix (bHLH) DNA-binding superfamily protein; FUNCTIONS IN: DNA binding, sequence-specific DNA binding transcription factor activity; INVOLVED IN: regulation of transcription; LOCATED IN: nucleus; EXPRESSED IN: 22 plant structures; EXPRESSED DURING: 13 growth stages; CONTAINS InterPro DOMAIN/s: Helix-loop-helix DNA-binding domain (InterPro:IPR001092), Helix-loop-helix DNA-binding…	AT1G03040	basic helix-loop-helix (bHLH) DNA-binding superfamily protein	RNA.regulation of transcription.bHLH,Basic Helix-Loop-Helix family				75.3299	84.6069	175.302	74.5723	63.4002	160.502	70.2271	89.7015	51.8273	98.6521	116.608	82.3737	70.11	17.3371	54.9207	118.686	82.8782	2.25317	2.67087	4.51209	3.12643	2.65941	5.11162	2.48752	2.97293	2.07696	3.33139	4.57815	2.85698	3.25005	0.702945	2.1793	3.68215	2.92006	3.14538	3.63249	2.51247	3.58884	2.0441	3.30111	1.20189
AT1G03050.1		ENTH/ANTH/VHS superfamily protein; FUNCTIONS IN: phospholipid binding, clathrin binding, binding, phosphatidylinositol binding; INVOLVED IN: N-terminal protein myristoylation, clathrin coat assembly; LOCATED IN: clathrin coat; EXPRESSED IN: 9 plant structures; EXPRESSED DURING: L mature pollen stage, M germinated pollen stage, 4 anthesis, C globular stage, petal differentiation and expansion stag…	AT1G03050	ENTH/ANTH/VHS superfamily protein	not assigned.no ontology.epsin N-terminal homology (ENTH) domain-containing protein				3	3	0	0	0	2	2	1	0	3	4	1	0	1	2	0	3	0.0632047	0.0666617	0	0	0	0.0448151	0.049913	0.0233188	0	0.0710553	0.110424	0.0244098	0	0.0285491	0.0558616	0	0.0743065	0.0432888	0.0149384	0.0244106	0.0686297	0.0281369	0.0371532	0.037529
AT1G03055.1	Encodes the ortholog of rice D27. It is plastid-localized and is required for the inhibition of secondary bud outgrowth and operates on a nonmobile precursor upstream of MAX1 in the SL biosynthesis pathway.	unknown protein; BEST Arabidopsis thaliana protein match is: unknown protein (TAIR:AT1G64680.1); Has 143 Blast hits to 143 proteins in 26 species: Archae - 0; Bacteria - 6; Metazoa - 0; Fungi - 0; Plants - 122; Viruses - 0; Other Eukaryotes - 15 (source: NCBI BLink).	D27	beta-carotene isomerase D27-like protein	not assigned.unknown				193.001	169.714	336.177	106.645	106.708	149.614	132.233	153.792	141.181	113.294	117.709	124.469	129.653	141.606	123.838	132.673	114.344	9.68901	9.00593	14.5209	7.50762	7.53157	8.01789	7.85631	8.57659	9.51547	6.48462	7.78776	7.25921	10.1277	9.64426	8.26056	6.91237	6.79217	11.0719	7.68569	8.64946	7.1772	9.34417	6.85227	3.00634
AT1G03055.2	Encodes the ortholog of rice D27. It is plastid-localized and is required for the inhibition of secondary bud outgrowth and operates on a nonmobile precursor upstream of MAX1 in the SL biosynthesis pathway.	unknown protein; BEST Arabidopsis thaliana protein match is: unknown protein (TAIR:AT1G64680.1); Has 35333 Blast hits to 34131 proteins in 2444 species: Archae - 798; Bacteria - 22429; Metazoa - 974; Fungi - 991; Plants - 531; Viruses - 0; Other Eukaryotes - 9610 (source: NCBI BLink).	D27	beta-carotene isomerase D27-like protein	not assigned.unknown				41.9989	18.2856	58.8225	9.35504	24.2921	43.3863	21.7675	24.2082	24.819	10.7058	11.2907	21.5314	44.3465	43.3945	30.1623	34.3267	20.6562	1.84848	0.850297	2.22764	0.577303	1.50201	2.03684	1.13404	1.18267	1.46562	0.535608	0.6541	1.10029	3.03352	2.59044	1.76307	1.56767	1.07425	1.64214	1.37205	1.26078	0.763333	2.46234	1.32096	0.711478
AT1G03060.1	Encodes a WD/BEACH domain protein involved in cell morphogenesis.	SPIRRIG (SPI); FUNCTIONS IN: binding; INVOLVED IN: signal transduction, multidimensional cell growth, vacuole organization, trichome morphogenesis; LOCATED IN: cellular_component unknown; EXPRESSED IN: 23 plant structures; EXPRESSED DURING: 15 growth stages; CONTAINS InterPro DOMAIN/s: WD40 repeat 2 (InterPro:IPR019782), Beige/BEACH (InterPro:IPR000409), WD40 repeat, conserved site (InterPro:IPR0…	SPI	BEACH-DOMAIN HOMOLOG A1	not assigned.no ontology				1653	2116	1916	1843	1677	2411	1518	994	1040	2571	2244	2040	930	1329	1190	2292	1924	5.71425	7.70457	5.70063	8.92481	8.10316	8.84471	6.21945	3.79487	4.80399	9.90794	10.1292	8.15726	4.95629	6.22117	5.44624	8.21201	7.78908	6.37315	8.62423	4.93944	9.39813	5.54123	8.00055	1.15306
AT1G03070.1		Bax inhibitor-1 family protein; CONTAINS InterPro DOMAIN/s: Inhibitor of apoptosis-promoting Bax1 related (InterPro:IPR006214); BEST Arabidopsis thaliana protein match is: Bax inhibitor-1 family protein (TAIR:AT4G02690.1); Has 5593 Blast hits to 5593 proteins in 1573 species: Archae - 0; Bacteria - 3054; Metazoa - 856; Fungi - 144; Plants - 197; Viruses - 83; Other Eukaryotes - 1259 (source: NCBI…	AT1G03070	Bax inhibitor-1 family protein	not assigned.no ontology				9	2	13	11	1.5149	0	12	0	2	2	2	2	6	3	1	4	7	0.399764	0.0938619	0.496852	0.685077	0.0945364	0	0.63093	0	0.119198	0.101002	0.116943	0.10315	0.414246	0.180739	0.0589933	0.184363	0.367433	0.330159	0.259871	0.250043	0.107032	0.217993	0.275898	0.210318
AT1G03070.2		Bax inhibitor-1 family protein; FUNCTIONS IN: glutamate binding; INVOLVED IN: biological_process unknown; LOCATED IN: cellular_component unknown; EXPRESSED IN: 24 plant structures; EXPRESSED DURING: 15 growth stages; CONTAINS InterPro DOMAIN/s: Inhibitor of apoptosis-promoting Bax1 related (InterPro:IPR006214); BEST Arabidopsis thaliana protein match is: Bax inhibitor-1 family protein (TAIR:AT4G0…	AT1G03070	Bax inhibitor-1 family protein	not assigned.no ontology				0	0	0	0	1.4851	15	0	3	0	0	0	0	0	0	0	0	0	0	0	0	0	0.0890656	0.683029	0	0.142157	0	0	0	0	0	0	0	0	0	0	0.257365	0.0473857	0	0	0	0
AT1G03080.1		kinase interacting (KIP1-like) family protein; FUNCTIONS IN: molecular_function unknown; INVOLVED IN: biological_process unknown; LOCATED IN: plasma membrane; EXPRESSED IN: 22 plant structures; EXPRESSED DURING: 13 growth stages; CONTAINS InterPro DOMAIN/s: Prefoldin (InterPro:IPR009053), KIP1-like (InterPro:IPR011684); BEST Arabidopsis thaliana protein match is: Kinase interacting (KIP1-like) fa…	NET1D	kinase interacting (KIP1-like) family protein	protein.postranslational modification				2624	2380	2382	1604	1339	2465	1683	1168	1260	2833	2201	2443	1183	1529	1435	1970	2082	18.1142	17.3098	14.1523	15.5124	12.9258	18.066	13.7685	8.90859	11.6268	21.8378	19.8534	19.5139	12.5987	14.295	13.1186	14.0965	16.8445	16.5254	15.5014	11.4346	20.4017	13.3374	15.4705	2.09418
AT1G03090.1	MCCA is the biotinylated subunit of the dimer MCCase, which is involved in leucine degradation. Both subunits are nuclear coded and the active enzyme is located in the mitochondrion.	MCCA; FUNCTIONS IN: cobalt ion binding, methylcrotonoyl-CoA carboxylase activity; INVOLVED IN: leucine catabolic process; LOCATED IN: mitochondrion, cytosolic ribosome; EXPRESSED IN: 26 plant structures; EXPRESSED DURING: 13 growth stages; CONTAINS InterPro DOMAIN/s: Single hybrid motif (InterPro:IPR011053), Biotin/lipoyl attachment (InterPro:IPR000089), Carbamoyl phosphate synthase, large subuni…	MCCA	methylcrotonyl-CoA carboxylase alpha chain	amino acid metabolism.degradation.branched chain group.leucine				53.077	50.1469	99.3984	21.6225	125.782	0	53.5364	93.3469	22.0211	91.2651	158.929	87.9362	75.7883	48.7124	1.73469e-07	86.8877	1.17023e-08	0.854436	0.851099	1.37707	0.487742	2.83472	0	1.02104	1.6622	0.474295	1.64775	3.34906	1.63937	1.88564	1.06241	3.70071e-09	1.45023	2.21232e-10	1.02754	1.10749	1.05251	2.21206	0.982683	0.725115	0.302711
AT1G03090.2	MCCA is the biotinylated subunit of the dimer MCCase, which is involved in leucine degradation. Both subunits are nuclear coded and the active enzyme is located in the mitochondrion.	MCCA; FUNCTIONS IN: cobalt ion binding, methylcrotonoyl-CoA carboxylase activity; INVOLVED IN: leucine catabolic process; LOCATED IN: mitochondrion, cytosolic ribosome; EXPRESSED IN: 26 plant structures; EXPRESSED DURING: 13 growth stages; CONTAINS InterPro DOMAIN/s: Single hybrid motif (InterPro:IPR011053), Biotin/lipoyl attachment (InterPro:IPR000089), Carbamoyl phosphate synthase, large subuni…	MCCA	methylcrotonyl-CoA carboxylase alpha chain	amino acid metabolism.degradation.branched chain group.leucine				565.467	504.922	480.045	560.619	355.987	723.666	316.072	241.366	276.251	705.649	472.752	588.682	285.125	372.044	488.162	619.259	561.37	8.88044	8.35992	6.48806	12.3368	7.82634	12.0792	5.88087	4.19267	5.8043	12.4265	9.71794	10.706	6.9201	7.91578	10.1594	10.0832	10.3524	7.90947	10.7474	5.29261	10.9501	8.33176	10.2178	1.25819
AT1G03100.1		Pentatricopeptide repeat (PPR) superfamily protein; CONTAINS InterPro DOMAIN/s: Pentatricopeptide repeat (InterPro:IPR002885); BEST Arabidopsis thaliana protein match is: Pentatricopeptide repeat (PPR) superfamily protein (TAIR:AT4G17616.1); Has 9904 Blast hits to 5133 proteins in 176 species: Archae - 0; Bacteria - 34; Metazoa - 111; Fungi - 31; Plants - 9502; Viruses - 0; Other Eukaryotes - 226…	AT1G03100	Pentatricopeptide repeat (PPR) superfamily protein	not assigned.no ontology.pentatricopeptide (PPR) repeat-containing protein				79.4563	72.9309	93.5562	60.7584	63.2316	90.3343	55.3913	56.2873	50.7284	75.0862	75.3191	71.3822	34.0862	58.2435	56.8377	97.853	80.6304	1.25345	1.21295	1.27015	1.34305	1.39641	1.51463	1.03525	0.982155	1.07066	1.32826	1.55526	1.30404	0.83102	1.2448	1.1882	1.60049	1.49365	1.24552	1.41803	1.02936	1.39585	1.08801	1.54707	0.0294137
AT1G03103.1		Bifunctional inhibitor/lipid-transfer protein/seed storage 2S albumin superfamily protein; FUNCTIONS IN: molecular_function unknown; INVOLVED IN: lipid transport; LOCATED IN: membrane; CONTAINS InterPro DOMAIN/s: Bifunctional inhibitor/plant lipid transfer protein/seed storage (InterPro:IPR016140), Plant lipid transfer protein/seed storage/trypsin-alpha amylase inhibitor (InterPro:IPR003612), Pla…	AT1G03103	Bifunctional inhibitor/lipid-transfer protein/seed storage 2S albumin superfamily protein	misc.protease inhibitor/seed storage/lipid transfer protein (LTP) family protein				0	0	0	0	0	0	0	0	0	0	0	0	0	0	0	0	0	0	0	0	0	0	0	0	0	0	0	0	0	0	0	0	0	0	0	0	0	0	0	0	0
AT1G03106.1		unknown protein; Has 35333 Blast hits to 34131 proteins in 2444 species: Archae - 798; Bacteria - 22429; Metazoa - 974; Fungi - 991; Plants - 531; Viruses - 0; Other Eukaryotes - 9610 (source: NCBI BLink).	AT1G03106	hypothetical protein	not assigned.unknown				0	1	0	0	0	0	0	1	1	0	0	3	0	0	2	1	2	0	0.0521116	0	0	0	0	0	0.054763	0.0661864	0	0	0.171818	0	0	0.131012	0.0511666	0.116652	0.0173705	0	0.0403165	0.0572727	0.0436707	0.0839093	0.0300866
AT1G03110.1	Encodes a gene involved in the modification of nucleosides in tRNA. Mutants have no 7-methylguanosine.	Transducin/WD40 repeat-like superfamily protein; CONTAINS InterPro DOMAIN/s: WD40 repeat 2 (InterPro:IPR019782), WD40 repeat-like-containing domain (InterPro:IPR011046), WD40 repeat, conserved site (InterPro:IPR019775), WD40-repeat-containing domain (InterPro:IPR017986), WD40/YVTN repeat-like-containing domain (InterPro:IPR015943), WD40 repeat (InterPro:IPR001680), WD40 repeat, subgroup (InterPro…	TRM82	Transducin/WD40 repeat-like superfamily protein	not assigned.no ontology				294	436	354	217	202	249	285	257	249	309	221	245	137	232	265	283	222	8.02204	12.5533	8.31214	8.29881	7.72705	7.23177	9.20986	7.7676	9.10047	9.50692	7.91111	7.74978	5.79045	8.58021	9.59065	8.00876	7.13122	9.62916	7.75254	8.69264	8.38927	7.9871	7.56999	2.53653
AT1G03120.1	Atrab28 plays a role in the ion cell balance during late embryogenesis and germination.	responsive to abscisic acid 28 (RAB28); CONTAINS InterPro DOMAIN/s: Seed maturation protein (InterPro:IPR007011); BEST Arabidopsis thaliana protein match is: Seed maturation protein (TAIR:AT3G22490.1); Has 159 Blast hits to 126 proteins in 17 species: Archae - 0; Bacteria - 0; Metazoa - 1; Fungi - 0; Plants - 157; Viruses - 0; Other Eukaryotes - 1 (source: NCBI BLink).	RAB28	responsive to abscisic acid 28	development.unspecified				15	10	16	2	5	3	6	3	2	7	7	5	6	5	4	4	6	1.45262	1.02763	1.33319	0.271974	0.684991	0.312048	0.686881	0.324702	0.261317	0.791	0.902049	0.565155	0.912784	0.658173	0.516743	0.402679	0.694943	1.27115	0.423004	0.4243	0.752735	0.6959	0.548811	0.219183
AT1G03130.1	Encodes a protein predicted by sequence similarity with spinach PsaD to be photosystem I reaction center subunit II (PsaD2)	photosystem I subunit D-2 (PSAD-2); FUNCTIONS IN: molecular_function unknown; INVOLVED IN: photosynthesis; LOCATED IN: in 6 components; EXPRESSED IN: 23 plant structures; EXPRESSED DURING: 14 growth stages; CONTAINS InterPro DOMAIN/s: Photosystem I protein PsaD (InterPro:IPR003685); BEST Arabidopsis thaliana protein match is: photosystem I subunit D-1 (TAIR:AT4G02770.1); Has 509 Blast hits to 509…	PSAD-2	photosystem I subunit D-2	PS.lightreaction.photosystem I.PSI polypeptide subunits				9305	7644	13965	2832	2817	3836	5308	6734	4824	1438	1519	2160	6515	7385	6133	2417	2258	484.149	420.469	625.18	206.641	206.119	213.114	326.836	389.312	337.043	85.3818	104.198	130.587	527.647	521.332	424.067	130.523	139.072	509.933	208.625	351.064	106.722	491.015	134.798	104.763
AT1G03140.1		splicing factor Prp18 family protein; INVOLVED IN: RNA splicing; LOCATED IN: spliceosomal complex; EXPRESSED IN: male gametophyte, cultured cell, pollen tube; EXPRESSED DURING: L mature pollen stage, M germinated pollen stage; CONTAINS InterPro DOMAIN/s: Pre-mRNA processing factor 4 (PRP4) like (InterPro:IPR014906), Splicing factor motif (InterPro:IPR003648), Prp18 (InterPro:IPR004098); BEST Arab…	AT1G03140	splicing factor Prp18 family protein	RNA.processing.splicing				863	907	1028	657	555	843	665	658	515	899	676	773	517	665	589	837	715	25.753	28.5655	26.3982	27.4806	23.226	26.7851	23.5004	21.7569	20.5904	30.2869	26.4784	26.7476	23.9103	26.9002	23.3176	25.9069	25.1328	26.9056	25.8306	21.9492	27.8376	24.7094	25.5199	1.4733
AT1G03150.1		Acyl-CoA N-acyltransferases (NAT) superfamily protein; FUNCTIONS IN: N-acetyltransferase activity; INVOLVED IN: metabolic process; LOCATED IN: cellular_component unknown; EXPRESSED IN: 22 plant structures; EXPRESSED DURING: 13 growth stages; CONTAINS InterPro DOMAIN/s: GCN5-related N-acetyltransferase, C-terminal (InterPro:IPR022610), GCN5-related N-acetyltransferase (InterPro:IPR000182), Acyl-Co…	AT1G03150	Acyl-CoA N-acyltransferases (NAT) superfamily protein	RNA.regulation of transcription.Silencing Group				289	252	296	183	172	241	223	242	194	282	239	250	181	254	255	277	227	18.8217	17.3678	16.585	16.7185	15.7787	16.7869	17.18	17.5408	16.9884	21.0926	20.5746	18.9414	18.3966	22.4554	22.0923	18.7304	17.551	17.5915	16.428	17.2364	20.2029	20.9814	18.1407	1.13501
AT1G03160.1	A new plant-specific member of the dynamin superfamily; defines a new protein class within the dynamin superfamily of membrane remodeling GTPases that regulates organization of the thylakoid network in plants. Targeted to chloroplasts and associated with thylakoid and envelope membranes as punctate structures. Knockout mutants have abnormalities in chloroplast and thylakoid morphology, including …	FZO-like (FZL); FUNCTIONS IN: thiamin-phosphate diphosphorylase activity, GTP binding; INVOLVED IN: vegetative to reproductive phase transition of meristem, thylakoid membrane organization; LOCATED IN: chloroplast membrane, chloroplast; EXPRESSED IN: 23 plant structures; EXPRESSED DURING: 13 growth stages; CONTAINS InterPro DOMAIN/s: Thiamine monophosphate synthase (InterPro:IPR003733), GTP-bindi…	FZL	FZO-like protein	signalling.G-proteins				1163.89	1235.3	1745.32	1235.28	1352.32	1761.75	939.791	864.779	982.024	1440.99	1288.03	1626.36	785.293	1081.95	969.732	1695.59	1453.59	16.4552	18.4105	21.2363	24.4708	26.76	26.4682	15.7425	13.5208	18.5723	22.8277	23.8287	26.6237	17.1529	20.7226	18.1663	24.8539	24.1241	18.7007	25.8997	15.9452	24.4267	18.6806	24.489	2.40372
AT1G03160.2	A new plant-specific member of the dynamin superfamily; defines a new protein class within the dynamin superfamily of membrane remodeling GTPases that regulates organization of the thylakoid network in plants. Targeted to chloroplasts and associated with thylakoid and envelope membranes as punctate structures. Knockout mutants have abnormalities in chloroplast and thylakoid morphology, including …	FZO-like (FZL); FUNCTIONS IN: thiamin-phosphate diphosphorylase activity, GTP binding, GTPase activity; INVOLVED IN: vegetative to reproductive phase transition of meristem, thylakoid membrane organization; LOCATED IN: chloroplast membrane, chloroplast; EXPRESSED IN: 23 plant structures; EXPRESSED DURING: 13 growth stages; CONTAINS InterPro DOMAIN/s: Thiamine monophosphate synthase (InterPro:IPR0…	FZL	FZO-like protein	signalling.G-proteins				72.1144	158.699	169.682	118.723	88.6799	120.249	91.2086	97.2207	57.9757	99.0054	119.967	74.6373	31.7067	55.0527	115.268	174.412	90.4082	0.994049	2.30593	2.01295	2.29302	1.71082	1.7613	1.48962	1.48193	1.06897	1.5289	2.1637	1.1912	0.675181	1.02803	2.10525	2.49252	1.46277	1.77098	1.92171	1.34684	1.62793	1.26949	1.97765	0.688601
AT1G03170.1	A member of the FAF family proteins encoded by the FANTASTIC FOUR (FAF) genes: AT4G02810 (FAF1), AT1G03170 (FAF2), AT5G19260 (FAF3) and AT3G06020 (FAF4). FAFs have the potential to regulate shoot meristem size in Arabidopsis thaliana. FAFs can repress WUS, which ultimately leads to an arrest of meristem activity in FAF overexpressing lines.	Protein of unknown function (DUF3049); CONTAINS InterPro DOMAIN/s: Protein of unknown function DUF3049 (InterPro:IPR021410); BEST Arabidopsis thaliana protein match is: Protein of unknown function (DUF3049) (TAIR:AT4G02810.1); Has 91 Blast hits to 91 proteins in 14 species: Archae - 0; Bacteria - 0; Metazoa - 0; Fungi - 2; Plants - 89; Viruses - 0; Other Eukaryotes - 0 (source: NCBI BLink).	FAF2	FANTASTIC four-like protein (DUF3049)	not assigned.unknown				6	4	1	5	7	4	10	5	8	2	4	7	10	10	4	3	9	0.256463	0.180625	0.0367791	0.299649	0.420277	0.182344	0.505983	0.237192	0.458744	0.0971155	0.224995	0.347361	0.664163	0.579714	0.227049	0.133054	0.454438	0.157956	0.300757	0.40064	0.223157	0.490309	0.293746	0.111583
AT1G03180.1		unknown protein; Has 36 Blast hits to 36 proteins in 15 species: Archae - 0; Bacteria - 0; Metazoa - 3; Fungi - 0; Plants - 33; Viruses - 0; Other Eukaryotes - 0 (source: NCBI BLink).	AT1G03180	non-structural protein	not assigned.unknown				45.1232	21.4093	80.1191	56.1291	45.1984	49.0375	39.4436	30.9686	20.1084	54.121	45.4223	52.0412	21.4421	27.3727	28.5963	57.9842	44.6685	1.84293	0.923617	2.81564	3.21401	2.59234	2.13545	1.9071	1.40341	1.10156	2.50876	2.44035	2.4671	1.36023	1.51612	1.55074	2.45712	2.1542	1.86073	2.64727	1.47069	2.47207	1.4757	2.30566	0.946137
AT1G03180.2		unknown protein; FUNCTIONS IN: molecular_function unknown; INVOLVED IN: biological_process unknown; LOCATED IN: mitochondrion; EXPRESSED IN: 15 plant structures; EXPRESSED DURING: 8 growth stages; Has 35333 Blast hits to 34131 proteins in 2444 species: Archae - 798; Bacteria - 22429; Metazoa - 974; Fungi - 991; Plants - 531; Viruses - 0; Other Eukaryotes - 9610 (source: NCBI BLink).	AT1G03180	non-structural protein	not assigned.unknown				24.8768	22.5907	19.8809	22.8709	23.8016	24.9625	29.5564	20.0314	17.8916	36.879	20.5777	26.9588	27.5579	25.6273	21.4037	39.0158	26.3315	0.711515	0.68186	0.489322	0.916865	0.954537	0.760079	1.00114	0.634728	0.685524	1.19011	0.772339	0.893984	1.22125	0.993545	0.81206	1.15741	0.886879	0.627566	0.87716	0.773797	0.952144	1.00895	1.02214	0.120637
AT1G03190.1	UV damage and heat induce a common stress response in plants that leads to tissue death and reduced chloroplast function. The UVH6 product is suggested to be a negative regulator of this response.	ULTRAVIOLET HYPERSENSITIVE 6 (UVH6); FUNCTIONS IN: in 6 functions; INVOLVED IN: DNA repair, response to UV, response to heat; LOCATED IN: nucleus; EXPRESSED IN: 25 plant structures; EXPRESSED DURING: 14 growth stages; CONTAINS InterPro DOMAIN/s: Helicase, superfamily 1/2, ATP-binding domain, DinG/Rad3-type (InterPro:IPR014013), Xeroderma pigmentosum group D protein (InterPro:IPR001945), Helicase-…	UVH6	RAD3-like DNA-binding helicase protein	DNA.repair				262	266	285	238	251	326	204	169	161	303	253	243	180	194	185	322	288	4.16208	4.45499	3.89636	5.29778	5.58201	5.50438	3.83941	2.96957	3.42186	5.39785	5.26088	4.47036	4.41922	4.17529	3.89459	5.30355	5.37258	4.17114	5.46139	3.41028	5.04303	4.16303	5.33807	0.279425
AT1G03190.2	UV damage and heat induce a common stress response in plants that leads to tissue death and reduced chloroplast function. The UVH6 product is suggested to be a negative regulator of this response.	ULTRAVIOLET HYPERSENSITIVE 6 (UVH6); FUNCTIONS IN: in 6 functions; INVOLVED IN: DNA repair, response to UV, response to heat; LOCATED IN: nucleus; EXPRESSED IN: 25 plant structures; EXPRESSED DURING: 14 growth stages; CONTAINS InterPro DOMAIN/s: Helicase, superfamily 1/2, ATP-binding domain, DinG/Rad3-type (InterPro:IPR014013), Xeroderma pigmentosum group D protein (InterPro:IPR001945), Helicase-…	UVH6	RAD3-like DNA-binding helicase protein	DNA.repair				0	0	0	0	0	0	0	0	0	0	0	0	0	0	0	0	0	0	0	0	0	0	0	0	0	0	0	0	0	0	0	0	0	0	0	0	0	0	0	0	0
AT1G03200.1		unknown protein; BEST Arabidopsis thaliana protein match is: unknown protein (TAIR:AT1G03240.1); Has 2 Blast hits to 2 proteins in 1 species: Archae - 0; Bacteria - 0; Metazoa - 0; Fungi - 0; Plants - 2; Viruses - 0; Other Eukaryotes - 0 (source: NCBI BLink).	AT1G03200	hypothetical protein	not assigned.unknown				73	71	77	38	38	92	54	30	30	91.8357	64	75	50	61	43	48	51	9.72921	10.074	8.83078	7.11929	7.1983	13.2353	8.5039	4.49035	5.41489	14.5177	11.4355	11.7108	10.5501	11.0688	7.66951	6.65928	8.19505	9.54466	9.1843	6.13638	12.5547	9.7628	7.42716	0.641827
AT1G03210.1		Phenazine biosynthesis PhzC/PhzF protein; FUNCTIONS IN: catalytic activity; INVOLVED IN: biosynthetic process; LOCATED IN: endomembrane system; EXPRESSED IN: 24 plant structures; EXPRESSED DURING: 15 growth stages; CONTAINS InterPro DOMAIN/s: Phenazine biosynthesis PhzC/PhzF protein (InterPro:IPR003719); BEST Arabidopsis thaliana protein match is: Phenazine biosynthesis PhzC/PhzF protein (TAIR:AT…	AT1G03210	Phenazine biosynthesis PhzC/PhzF protein	not assigned.no ontology				397	589	453	465	536	727	510	474	400	770	635	716	269	455	385	703	580	21.5582	33.8192	21.1649	35.4126	40.943	42.165	32.7717	28.6079	29.1741	47.768	45.4813	45.1867	22.7477	33.5254	27.7881	39.6235	37.3012	25.5141	39.5069	30.1846	46.1453	28.0204	38.4624	7.19512
AT1G03220.1		Eukaryotic aspartyl protease family protein; FUNCTIONS IN: aspartic-type endopeptidase activity; INVOLVED IN: response to salt stress; LOCATED IN: cell wall, plasma membrane, membrane, plant-type cell wall; EXPRESSED IN: 6 plant structures; CONTAINS InterPro DOMAIN/s: Peptidase aspartic (InterPro:IPR021109), Peptidase aspartic, catalytic (InterPro:IPR009007), Peptidase A1 (InterPro:IPR001461); BE…	AT1G03220	Eukaryotic aspartyl protease family protein	protein.degradation.aspartate protease				896	933.499	641	817	637	914	562	440	288	1358	801	800	284	475	923.643	635	650.67	25.0509	27.5413	15.4221	32.0157	24.9699	27.2023	18.6086	13.6276	10.7861	42.8252	29.3842	25.9309	12.3012	18.0009	34.2537	18.4136	21.4197	22.6714	28.0626	14.3408	32.7134	21.5186	19.9167	6.4004
AT1G03230.1		Eukaryotic aspartyl protease family protein; FUNCTIONS IN: aspartic-type endopeptidase activity; INVOLVED IN: response to salt stress; LOCATED IN: cell wall, plant-type cell wall; EXPRESSED IN: stem, root; CONTAINS InterPro DOMAIN/s: Peptidase aspartic (InterPro:IPR021109), Peptidase aspartic, catalytic (InterPro:IPR009007), Peptidase A1 (InterPro:IPR001461); BEST Arabidopsis thaliana protein mat…	AT1G03230	Eukaryotic aspartyl protease family protein	protein.degradation.aspartate protease				171	305.501	281	328	321	376	247	252	157	393	287	255	160	202	196.357	281	313.33	4.88	9.20048	6.90079	13.1199	12.8446	11.4232	8.34786	7.96726	6.00214	12.6538	10.7479	8.43725	7.07469	7.81394	7.43321	8.3174	10.5298	6.99376	12.4626	7.43909	10.613	7.44061	9.4236	2.16174
AT1G03240.1		unknown protein; BEST Arabidopsis thaliana protein match is: unknown protein (TAIR:AT1G03200.1); Has 2 Blast hits to 2 proteins in 1 species: Archae - 0; Bacteria - 0; Metazoa - 0; Fungi - 0; Plants - 2; Viruses - 0; Other Eukaryotes - 0 (source: NCBI BLink).	AT1G03240	hypothetical protein	not assigned.unknown				8	1	5	0	1	1	1	1	0	4.03276	2	2	1	1	0	3	2	0.957303	0.127227	0.514825	0	0.169749	0.128912	0.1414	0.134164	0	0.569106	0.319991	0.279987	0.18888	0.162843	0	0.37349	0.287736	0.533118	0.0995537	0.0918547	0.389695	0.117241	0.330613	0.41534
AT1G03250.1		unknown protein; Has 89 Blast hits to 89 proteins in 31 species: Archae - 0; Bacteria - 0; Metazoa - 31; Fungi - 0; Plants - 48; Viruses - 0; Other Eukaryotes - 10 (source: NCBI BLink).	AT1G03250	R3H domain protein	not assigned.unknown				714.138	741.867	841.375	506.897	471.781	679.83	504.008	570.858	548.118	743.687	563.265	653.576	380.266	575.597	546.175	671.65	583.951	27.0202	29.6424	27.3929	26.8873	25.0578	27.4154	22.5773	23.9565	27.808	31.8896	28.0178	28.6955	22.334	29.5311	27.432	26.3645	26.0716	28.0185	26.4535	24.7806	29.5343	26.4324	26.2181	1.41863
AT1G03250.2		unknown protein; FUNCTIONS IN: molecular_function unknown; INVOLVED IN: biological_process unknown; LOCATED IN: cellular_component unknown; EXPRESSED IN: 24 plant structures; EXPRESSED DURING: 15 growth stages.	AT1G03250	R3H domain protein	not assigned.unknown				45.862	37.1331	5.62512	28.1029	25.2195	43.1704	32.9921	18.1425	18.8825	27.3128	52.7349	5.42389	16.7341	23.4029	18.8254	42.3504	38.0491	1.70184	1.45507	0.179614	1.46194	1.31359	1.70725	1.44948	0.746638	0.939469	1.14824	2.57226	0.233538	0.963777	1.17754	0.927265	1.63036	1.66581	1.11217	1.49426	1.0452	1.31801	1.02286	1.64809	0.816992
AT1G03260.1		SNARE associated Golgi protein family; LOCATED IN: endomembrane system; EXPRESSED IN: 24 plant structures; EXPRESSED DURING: 15 growth stages; CONTAINS InterPro DOMAIN/s: SNARE associated Golgi protein (InterPro:IPR015414); BEST Arabidopsis thaliana protein match is: SNARE associated Golgi protein family (TAIR:AT5G19070.1); Has 5379 Blast hits to 5379 proteins in 1283 species: Archae - 29; Bacter…	AT1G03260	SNARE associated Golgi protein family	not assigned.unknown				301	256	317	236	215	300	184	187	170	284	259	291	142	198	217	360	250	9.82644	8.82225	8.90525	10.7997	9.84655	10.4317	7.11289	6.76673	7.43775	10.4813	11.1045	11.0186	7.18851	8.76315	9.40015	12.191	9.61961	9.18465	10.3593	7.10579	10.8681	8.4506	10.9053	0.557356
AT1G03270.1		CBS domain-containing protein with a domain of unknown function (DUF21); FUNCTIONS IN: molecular_function unknown; INVOLVED IN: biological_process unknown; LOCATED IN: endomembrane system; EXPRESSED IN: 21 plant structures; EXPRESSED DURING: 14 growth stages; CONTAINS InterPro DOMAIN/s: Protein of unknown function DUF21 (InterPro:IPR002550); BEST Arabidopsis thaliana protein match is: CBS domain-…	AT1G03270	CBS domain protein with a domain protein (DUF21)	not assigned.unknown				89	57	105	68	52	74	51	31	27	68	49	59	43	50	65	68	59	2.54365	1.71917	2.58241	2.72401	2.08385	2.25153	1.7262	0.981558	1.03375	2.19276	1.83773	1.95505	1.90416	1.93701	2.46428	2.01574	1.98572	2.28174	2.35313	1.24717	1.99518	2.10182	2.00073	0.487588
AT1G03280.1		Transcription factor TFIIE, alpha subunit; FUNCTIONS IN: RNA polymerase II transcription factor activity, transcription initiation factor activity; INVOLVED IN: transcription initiation from RNA polymerase II promoter; LOCATED IN: endomembrane system, transcription factor TFIIE complex; EXPRESSED IN: 24 plant structures; EXPRESSED DURING: 15 growth stages; CONTAINS InterPro DOMAIN/s: Transcriptio…	AT1G03280	Transcription factor TFIIE, alpha subunit	RNA.transcription				1026	878	945	620	671	873	612	565	574	928	831	904	551	715	678	1074	787	22.6042	20.403	17.9168	19.1426	20.7111	20.4585	15.9711	13.7791	16.9297	22.9952	23.9938	23.0773	18.7841	21.3466	19.8043	24.5371	20.3885	20.308	20.1041	15.56	23.3554	19.9783	22.4628	2.34514
AT1G03290.1		unknown protein; BEST Arabidopsis thaliana protein match is: unknown protein (TAIR:AT4G02880.2); Has 13587 Blast hits to 10183 proteins in 1114 species: Archae - 257; Bacteria - 2402; Metazoa - 5637; Fungi - 960; Plants - 675; Viruses - 54; Other Eukaryotes - 3602 (source: NCBI BLink).	AT1G03290	ELKS/Rab6-interacting/CAST family protein	not assigned.unknown				546.76	553.756	323.273	274.292	366.882	521.856	471.983	353.404	319.952	953.42	694.015	640.08	261.7	499.949	381.453	603.603	596.94	12.3348	13.1775	6.27613	8.67207	11.5967	12.5238	12.6124	8.82608	9.66367	24.198	20.5214	16.7327	9.13659	15.2846	11.4099	14.1212	15.8376	10.5961	10.9309	10.3674	20.484	11.9437	14.9794	3.76489
AT1G03290.2		unknown protein; FUNCTIONS IN: molecular_function unknown; INVOLVED IN: biological_process unknown; LOCATED IN: cellular_component unknown; EXPRESSED IN: 22 plant structures; EXPRESSED DURING: 13 growth stages; BEST Arabidopsis thaliana protein match is: unknown protein (TAIR:AT4G02880.2).	AT1G03290	ELKS/Rab6-interacting/CAST family protein	not assigned.unknown				687.24	746.244	665.727	409.708	373.118	711.144	667.017	625.596	485.048	915.58	690.985	1019.92	311.3	753.051	568.547	614.397	713.06	12.9694	14.8507	10.8119	10.8348	9.8611	14.2697	14.9119	13.0636	12.2505	19.4042	17.0791	22.2959	9.08477	19.2558	14.2219	12.0226	15.8126	12.8773	11.6552	13.4087	19.5931	14.1875	13.9176	2.02097
AT1G03300.1	Member of the plant-specific DUF724 protein family. Arabidopsis has 10 DUF724 proteins. Loss of function mutant has a WT phenotype	DOMAIN OF UNKNOWN FUNCTION 724 1 (ATDUF1); FUNCTIONS IN: RNA binding; INVOLVED IN: biological_process unknown; LOCATED IN: nucleus; EXPRESSED IN: 30 plant structures; EXPRESSED DURING: 14 growth stages; CONTAINS InterPro DOMAIN/s: Tudor-like, plant (InterPro:IPR014002), Agenet (InterPro:IPR008395), Protein of unknown function DUF724 (InterPro:IPR007930); BEST Arabidopsis thaliana protein match is…	ATDUF1	agenet domain protein (DOMAIN OF UNKNOWN FUNCTION 724 1)	not assigned.no ontology.agenet domain-containing protein				99	97	114	77	106	78	51	54	60	123	108	83	54	66	66	147	102	2.04991	2.1183	2.0314	2.23432	3.07449	1.71767	1.25092	1.23752	1.66299	2.8627	2.92999	1.99113	1.72972	1.85183	1.8117	3.15629	2.4828	2.06654	2.34216	1.38381	2.59461	1.79775	2.81955	0.0457738
AT1G03310.1	Encodes a protein with strong similarity to isoamylase (EC:3.2.1.68) however lacks critical residues known to be important for activity. Appears to co localize with ISA1 in the chloroplast isoamylase complex. Mutations in this gene cause the loss of detectable isoamylase activity and the disruption of normal starch structure. It has been postulated that AtISA2 interacts with AtISA1 to form the Is…	debranching enzyme 1 (DBE1); FUNCTIONS IN: isoamylase activity, alpha-amylase activity; INVOLVED IN: carbohydrate metabolic process, amylopectin biosynthetic process; LOCATED IN: chloroplast; EXPRESSED IN: 22 plant structures; EXPRESSED DURING: 13 growth stages; CONTAINS InterPro DOMAIN/s: Glycoside hydrolase, family 13, N-terminal (InterPro:IPR004193), Immunoglobulin E-set (InterPro:IPR014756), …	DBE1	debranching enzyme 1	major CHO metabolism.synthesis.starch.debranching				683.776	764.528	1207.78	664	717.216	1110.86	424.265	609.57	540.708	616.119	780.267	798.568	474.572	861.016	635.102	1134.09	823.108	9.47963	11.1728	14.4104	12.8983	13.9164	16.3646	6.96896	9.34522	10.0272	9.56954	14.1539	12.8184	10.1641	16.1707	11.6663	16.3006	13.3944	11.6876	14.3931	8.78046	12.1806	12.667	14.8475	2.50537
AT1G03310.2	Encodes a protein with strong similarity to isoamylase (EC:3.2.1.68) however lacks critical residues known to be important for activity. Appears to co localize with ISA1 in the chloroplast isoamylase complex. Mutations in this gene cause the loss of detectable isoamylase activity and the disruption of normal starch structure. It has been postulated that AtISA2 interacts with AtISA1 to form the Is…	debranching enzyme 1 (DBE1); FUNCTIONS IN: isoamylase activity, alpha-amylase activity; INVOLVED IN: carbohydrate metabolic process, amylopectin biosynthetic process; LOCATED IN: chloroplast; EXPRESSED IN: 22 plant structures; EXPRESSED DURING: 13 growth stages; CONTAINS InterPro DOMAIN/s: Glycoside hydrolase, family 13, N-terminal (InterPro:IPR004193), Immunoglobulin E-set (InterPro:IPR014756), …	DBE1	debranching enzyme 1	major CHO metabolism.synthesis.starch.debranching				745.224	702.472	1177.22	691	655.784	819.144	760.735	498.43	793.292	620.881	473.733	839.432	438.428	569.984	684.898	739.905	603.892	10.3019	10.2364	14.0056	13.3843	12.6878	12.0326	12.46	7.6194	14.669	9.61568	8.56872	13.4357	9.36299	10.6741	12.5449	10.6043	9.79883	11.5146	12.7016	11.5828	10.54	10.8607	10.2016	2.15749
AT1G03320.1		unknown protein; Has 1038 Blast hits to 683 proteins in 112 species: Archae - 4; Bacteria - 14; Metazoa - 318; Fungi - 117; Plants - 86; Viruses - 8; Other Eukaryotes - 491 (source: NCBI BLink).	AT1G03320	hypothetical protein	not assigned.unknown				7	2	7	6	5	4	4	5	3	6	7	3	5	7	2	7	0	0.527121	0.159501	0.453466	0.633943	0.531029	0.322572	0.3562	0.419578	0.30407	0.521501	0.698177	0.263062	0.588797	0.715837	0.200506	0.547449	0	0.380029	0.495848	0.359949	0.494247	0.501713	0.273724	0.194501
AT1G03330.1		Small nuclear ribonucleoprotein family protein; CONTAINS InterPro DOMAIN/s: Like-Sm ribonucleoprotein (LSM) domain (InterPro:IPR001163), U6 snRNA-associated Sm-like protein LSm2 (InterPro:IPR016654), Like-Sm ribonucleoprotein (LSM) domain, eukaryotic/archaea-type (InterPro:IPR006649), Like-Sm ribonucleoprotein (LSM)-related domain (InterPro:IPR010920); Has 762 Blast hits to 762 proteins in 209 sp…	LSM2	Small nuclear ribonucleoprotein family protein	RNA.processing				762	673	756	556	583	796	557	582	496	882	698	694	435	582	585	819	710	51.0939	47.7614	43.6108	52.2992	55.0768	57.0986	44.1776	43.4427	44.7272	67.985	61.8884	54.1457	45.5376	52.9783	52.1886	57.0203	56.5426	47.4887	54.8249	44.1158	61.3397	50.2348	56.7814	3.749
AT1G03340.1		unknown protein; BEST Arabidopsis thaliana protein match is: unknown protein (TAIR:AT4G02920.1); Has 44 Blast hits to 41 proteins in 13 species: Archae - 0; Bacteria - 1; Metazoa - 0; Fungi - 0; Plants - 43; Viruses - 0; Other Eukaryotes - 0 (source: NCBI BLink).	AT1G03340	hypothetical protein	not assigned.unknown				72	59	69	24	44	39	68	48	35	74	21	69	20	55	36	51	61	2.42019	2.09368	1.99581	1.13086	2.07509	1.39649	2.70652	1.78862	1.57685	2.8133	0.927231	2.69034	1.04268	2.50646	1.60582	1.7783	2.41728	2.16989	1.53415	2.024	2.14362	1.71832	2.09779	0.222218
AT1G03350.1		BSD domain-containing protein; FUNCTIONS IN: molecular_function unknown; INVOLVED IN: biological_process unknown; LOCATED IN: cellular_component unknown; EXPRESSED IN: 24 plant structures; EXPRESSED DURING: 15 growth stages; CONTAINS InterPro DOMAIN/s: BSD (InterPro:IPR005607); BEST Arabidopsis thaliana protein match is: BSD domain-containing protein (TAIR:AT4G13110.1); Has 10642 Blast hits to 59…	AT1G03350	BSD domain-containing protein	not assigned.no ontology.BSD domain-containing protein				1151	1122	1342	858	838	1205	901	825	850	1369	1045	1104	786	873	872	1220	1172	27.649	28.433	27.742	28.8854	28.2096	30.7978	25.6356	21.9431	27.3405	37.0229	32.9115	30.7346	29.2279	28.4207	27.7764	30.3924	33.1202	27.9413	29.2976	24.9731	33.5563	28.475	31.7563	0.428327
AT1G03360.1		ribosomal RNA processing 4 (RRP4); FUNCTIONS IN: exonuclease activity; LOCATED IN: mitochondrion; EXPRESSED IN: 20 plant structures; EXPRESSED DURING: 13 growth stages; CONTAINS InterPro DOMAIN/s: Nucleic acid-binding, OB-fold-like (InterPro:IPR016027); Has 615 Blast hits to 615 proteins in 291 species: Archae - 147; Bacteria - 0; Metazoa - 136; Fungi - 134; Plants - 55; Viruses - 0; Other Eukary…	RRP4	ribosomal RNA processing 4	RNA.processing.ribonucleases				207	211	205	124	143	133	184	204	156	218	151	131	85	141	231	133	114	7.17059	7.7169	6.11068	6.02139	6.95096	4.9085	7.547	7.83485	7.24368	8.54524	6.8723	5.26427	4.56771	6.62222	10.6196	4.77935	4.6566	6.99939	5.96028	7.54184	6.89394	7.26984	4.71798	0.816681
AT1G03365.1		RING/U-box superfamily protein; FUNCTIONS IN: zinc ion binding; CONTAINS InterPro DOMAIN/s: Zinc finger, RING-type (InterPro:IPR001841); BEST Arabidopsis thaliana protein match is: RING/U-box superfamily protein (TAIR:AT4G03000.2).	AT1G03365	RING/U-box superfamily protein	protein.degradation.ubiquitin.E3.RING				457	442	461	287	307	448	336	276	312	464	379	387	269	337	339	430	430	6.56222	6.69056	5.69698	5.77444	6.17018	6.83613	5.71636	4.38287	5.99307	7.46628	7.1215	6.43445	5.96786	6.55561	6.45006	6.40156	7.24834	6.31659	6.26025	5.3641	7.00741	6.32451	6.82495	0.540418
AT1G03370.1		C2 calcium/lipid-binding and GRAM domain containing protein; CONTAINS InterPro DOMAIN/s: C2 membrane targeting protein (InterPro:IPR018029), C2 calcium/lipid-binding domain, CaLB (InterPro:IPR008973), GRAM (InterPro:IPR004182), C2 region (InterPro:IPR020477), C2 calcium-dependent membrane targeting (InterPro:IPR000008); BEST Arabidopsis thaliana protein match is: C2 calcium/lipid-binding and GRAM…	AT1G03370	C2 calcium/lipid-binding and GRAM domain containing protein	protein.degradation.ubiquitin.E3.RING				883	1273	943	768	802	1166	747	629	638	1419	1116	1118	541	771	700	1171	1097	9.40959	14.2962	8.64852	11.4664	11.9566	13.1979	9.4325	7.40926	9.09136	16.9152	15.5509	13.7901	8.90058	11.1288	9.88128	12.9361	13.7119	10.7848	12.207	8.64437	15.4187	9.97022	13.324	3.0647
AT1G03380.1		homolog of yeast autophagy 18 (ATG18) G (ATG18G); CONTAINS InterPro DOMAIN/s: WD40 repeat-like-containing domain (InterPro:IPR011046), Breast carcinoma amplified sequence 3 (InterPro:IPR022175), WD40 repeat (InterPro:IPR001680), WD40/YVTN repeat-like-containing domain (InterPro:IPR015943), WD40 repeat, subgroup (InterPro:IPR019781); BEST Arabidopsis thaliana protein match is: homolog of yeast aut…	ATG18G	yeast autophagy 18 G-like protein	protein.degradation.autophagy				1202	1325	1445	954	929	1728	810	696	755	1578	1459	1722	607	907	886	1601	1401	12.9413	15.0341	13.3894	14.3907	13.9933	19.7614	10.3337	8.28331	10.8699	19.0059	20.5409	21.46	10.0898	13.2272	12.6362	17.8692	17.6931	13.7883	16.0485	9.82897	20.3356	11.9844	17.7812	1.10194
AT1G03390.1		HXXXD-type acyl-transferase family protein; FUNCTIONS IN: transferase activity, transferring acyl groups other than amino-acyl groups, transferase activity; INVOLVED IN: biological_process unknown; EXPRESSED IN: sepal, flower; EXPRESSED DURING: petal differentiation and expansion stage; CONTAINS InterPro DOMAIN/s: Transferase (InterPro:IPR003480); BEST Arabidopsis thaliana protein match is: HXXXD…	AT1G03390	HXXXD-type acyl-transferase family protein	protein.postranslational modification				1	0	0	0	0	0	2	1	1	1	2	2	1	2	2	2	4	0.0312185	0	0	0	0	0	0.0739368	0.0345973	0.0418324	0.0352678	0.0819764	0.0724081	0.048396	0.0846415	0.08284	0.0647639	0.147137	0.0104062	0	0.0501222	0.0632174	0.0719592	0.10595	0.018024
AT1G03400.1	A single copy gene that encodes a protein with sequence similarity to tomato E8 (ACC oxidase, the last step in ethylene biosynthesis) involved in ethylene synthesis and fruit ripening in tomato. This gene is not induced by ethylene in siliques. The transcript is found in siliques, etiolated seedlings, leaves, stems and flowers.	2-oxoglutarate (2OG) and Fe(II)-dependent oxygenase superfamily protein; CONTAINS InterPro DOMAIN/s: Oxoglutarate/iron-dependent oxygenase (InterPro:IPR005123); BEST Arabidopsis thaliana protein match is: 2-oxoglutarate (2OG) and Fe(II)-dependent oxygenase superfamily protein (TAIR:AT1G03410.1); Has 8186 Blast hits to 8162 proteins in 1002 species: Archae - 0; Bacteria - 1123; Metazoa - 116; Fung…	AT1G03400	2-oxoglutarate (2OG) and Fe(II)-dependent oxygenase superfamily protein	hormone metabolism.ethylene.synthesis-degradation				851	799	826	507	513	731	654	759	669	949	804	887	483	858	482	838	804	30.2399	29.978	25.2568	25.2556	25.5823	27.6776	27.5161	29.9059	31.8688	38.1757	37.5426	36.5672	26.6299	41.3383	22.7321	30.8914	33.6955	28.4916	26.1718	29.7636	37.4285	30.2334	32.2934	2.80445
AT1G03410.1		2A6; FUNCTIONS IN: oxidoreductase activity; LOCATED IN: endomembrane system; EXPRESSED IN: 17 plant structures; EXPRESSED DURING: 10 growth stages; CONTAINS InterPro DOMAIN/s: Oxoglutarate/iron-dependent oxygenase (InterPro:IPR005123); BEST Arabidopsis thaliana protein match is: 2-oxoglutarate (2OG) and Fe(II)-dependent oxygenase superfamily protein (TAIR:AT1G03400.1); Has 8330 Blast hits to 8293…	2A6	2-oxoglutarate (2OG) and Fe(II)-dependent oxygenase superfamily protein	hormone metabolism.ethylene.synthesis-degradation				86.6855	84.8162	127.28	25.2157	34.5514	51.9029	31.4626	28.0866	25.1695	48.4302	48.8707	50.2208	50.1694	51.6802	25.2055	59.8786	45.5891	1.33632	1.37843	1.68862	0.544677	0.745612	0.850379	0.574634	0.47889	0.519094	0.837053	0.986057	0.896513	1.19516	1.07934	0.514903	0.957045	0.825207	1.46779	0.713556	0.524206	0.906541	0.929801	0.891126	0.1924
AT1G03420.1	Member of Sadhu non-coding retrotransposon family		Sadhu4-2	transposable_element_gene	DNA.synthesis/chromatin structure.retrotransposon/transposase				1196.31	1021.18	1348.72	799.784	823.449	916.097	825.537	774.913	727.831	895.57	814.129	961.779	639.831	738.32	760.795	1322.12	864.411	49.8636	44.9625	48.3717	46.7381	48.2038	40.7174	40.7335	35.8418	40.6938	42.3837	44.6456	46.535	41.4297	41.7354	42.1071	57.178	42.5515	47.7326	45.2198	39.0897	44.5214	41.7574	49.8648	2.51228
AT1G03430.1	Encodes AHP5, one of the six Arabidopsis thaliana histidine phosphotransfer proteins (AHPs). AHPs function as redundant positive regulators of cytokinin signaling. Members of the AHP gene family include: AT3G21510 (AHP1), AT3G29350 (AHP2), AT5G39340 (AHP3), AT3G16360 (AHP4), AT1G03430 (AHP5) and AT1G80100 (AHP6).	histidine-containing phosphotransfer factor 5 (AHP5); CONTAINS InterPro DOMAIN/s: Signal transduction histidine kinase, phosphotransfer (Hpt) domain (InterPro:IPR008207); BEST Arabidopsis thaliana protein match is: histidine-containing phosphotransmitter 2 (TAIR:AT3G29350.1); Has 311 Blast hits to 310 proteins in 49 species: Archae - 2; Bacteria - 33; Metazoa - 0; Fungi - 8; Plants - 266; Viruses…	AHP5	histidine-containing phosphotransfer factor 5	signalling.receptor kinases.misc				272	336	314	208	238	356	262	286	190	377	352	368	158	252	205	366	352	11.9988	15.6602	11.9185	12.8652	14.7497	16.7515	13.6809	14.0044	11.2458	18.9053	20.4394	18.8487	10.8329	15.0776	12.0103	16.7532	18.3485	13.1925	14.7888	12.977	19.3978	12.6403	17.5509	2.13747
AT1G03440.1		Leucine-rich repeat (LRR) family protein; INVOLVED IN: signal transduction; LOCATED IN: endomembrane system; EXPRESSED IN: 23 plant structures; EXPRESSED DURING: 13 growth stages; CONTAINS InterPro DOMAIN/s: Leucine-rich repeat-containing N-terminal domain, type 2 (InterPro:IPR013210), Leucine-rich repeat (InterPro:IPR001611); BEST Arabidopsis thaliana protein match is: RNI-like superfamily prote…	AT1G03440	Leucine-rich repeat (LRR) family protein	not assigned.no ontology				807	677	1064	336	328	461	357	441	417	390	349	408	516	462	499	478	438	20.5236	18.1652	23.2862	11.9762	11.6917	12.4763	10.7534	12.4204	14.2024	11.1738	11.64	12.0268	20.32	15.9244	16.83	12.6074	13.1084	20.6583	12.0481	12.4587	11.6135	17.6915	12.8579	2.56316
AT1G03445.1	encodes a serine‚Äìthreonine protein phosphatase with an N-terminal Kelch-repeat domain, which is nuclear localized and expressed preferentially in elongating cells. Genetic evidence suggest that this gene plays a redundant role (along with other members of the same gene family) in modulating growth in response to brassinosteroid.	BRI1 SUPPRESSOR 1 (BSU1); FUNCTIONS IN: protein binding, protein serine/threonine phosphatase activity; INVOLVED IN: brassinosteroid mediated signaling pathway, regulation of protein localization; LOCATED IN: nucleus; EXPRESSED IN: sperm cell, male gametophyte, cultured cell, pollen tube; EXPRESSED DURING: L mature pollen stage, M germinated pollen stage; CONTAINS InterPro DOMAIN/s: Serine/threon…	BSU1	Serine/threonine protein phosphatase family protein	protein.postranslational modification				3	2	2	3	1	2	0	1	1	1	1	4	0	3	1	0	0	0.0449008	0.0315565	0.0257615	0.0629149	0.0209503	0.0318122	0	0.0165532	0.0200226	0.0167769	0.0195877	0.0693239	0	0.0608294	0.0198328	0	0	0.0340729	0.0385591	0.0121919	0.0352295	0.0268874	0	0.00981466
AT1G03457.1		RNA-binding (RRM/RBD/RNP motifs) family protein; FUNCTIONS IN: RNA binding, nucleotide binding, nucleic acid binding; INVOLVED IN: biological_process unknown; LOCATED IN: cellular_component unknown; EXPRESSED IN: 17 plant structures; EXPRESSED DURING: 14 growth stages; CONTAINS InterPro DOMAIN/s: RNA recognition motif, RNP-1 (InterPro:IPR000504), Ribonucleoprotein, BRUNO-like (InterPro:IPR015903)…	AT1G03457	RNA-binding (RRM/RBD/RNP motifs) family protein	RNA.RNA binding				122.734	37.0425	104.055	57.2427	47.3261	70.6412	34.5894	29.7174	51	71.7007	50.141	29.2931	50.1791	32.75	36	90.3225	43.5784	3.02169	0.962128	2.2046	1.97515	1.63294	1.85058	1.00864	0.810158	1.68139	1.98792	1.61867	0.835857	1.91264	1.09276	1.17534	2.30618	1.26234	2.06281	1.81956	1.16673	1.48082	1.39358	1.78426	1.03708
AT1G03457.2		RNA-binding (RRM/RBD/RNP motifs) family protein; FUNCTIONS IN: RNA binding, nucleotide binding, nucleic acid binding; INVOLVED IN: biological_process unknown; LOCATED IN: cellular_component unknown; EXPRESSED IN: 17 plant structures; EXPRESSED DURING: 14 growth stages; CONTAINS InterPro DOMAIN/s: RNA recognition motif, RNP-1 (InterPro:IPR000504), Ribonucleoprotein, BRUNO-like (InterPro:IPR015903)…	AT1G03457	RNA-binding (RRM/RBD/RNP motifs) family protein	RNA.RNA binding				103.266	48.9575	64.9453	15.7573	21.6739	23.3588	12.4106	34.2826	0	32.2993	21.859	33.7069	34.8209	21.25	0	16.6775	39.4216	2.58032	1.29059	1.3965	0.551811	0.759015	0.621077	0.367289	0.948591	0	0.909014	0.716232	0.97617	1.34713	0.719622	0	0.432172	1.15905	1.7558	0.643968	0.438627	0.867139	0.688917	0.795611	0.716013
AT1G03470.1	Encodes a member of the NET superfamily of proteins that potentially couples different membranes to the actin cytoskeleton in plant cells. It colocalizes with filamentous actin and is localized to the nuclear membrane and the vacuolar membrane.	Kinase interacting (KIP1-like) family protein; CONTAINS InterPro DOMAIN/s: KIP1-like (InterPro:IPR011684); BEST Arabidopsis thaliana protein match is: Kinase interacting (KIP1-like) family protein (TAIR:AT2G47920.1); Has 687 Blast hits to 664 proteins in 124 species: Archae - 6; Bacteria - 10; Metazoa - 109; Fungi - 52; Plants - 347; Viruses - 3; Other Eukaryotes - 160 (source: NCBI BLink).	NET3A	Kinase interacting (KIP1-like) family protein	protein.postranslational modification				11.7564	46.0851	18.7372	30.7207	32.9079	18.2992	15.2389	23.0047	35.5303	44.0724	30.2335	17.3366	47.6909	75	0	9.33036	11.9775	0.413564	1.71168	0.567182	1.51494	1.62451	0.685874	0.634726	0.897285	1.67549	1.75482	1.39747	0.707517	2.60283	3.57717	0	0.340492	0.496895	0.897475	1.27511	1.06917	1.2866	2.06	0.418693	0.709293
AT1G03470.2	Encodes a member of the NET superfamily of proteins that potentially couples different membranes to the actin cytoskeleton in plant cells. It colocalizes with filamentous actin and is localized to the nuclear membrane and the vacuolar membrane.	Kinase interacting (KIP1-like) family protein; CONTAINS InterPro DOMAIN/s: KIP1-like (InterPro:IPR011684); BEST Arabidopsis thaliana protein match is: Kinase interacting (KIP1-like) family protein (TAIR:AT2G47920.1); Has 35333 Blast hits to 34131 proteins in 2444 species: Archae - 798; Bacteria - 22429; Metazoa - 974; Fungi - 991; Plants - 531; Viruses - 0; Other Eukaryotes - 9610 (source: NCBI B…	NET3A	Kinase interacting (KIP1-like) family protein	protein.postranslational modification				48.2436	21.9149	68.2628	29.2793	37.0921	64.7008	65.7611	28.9953	50.4697	77.9276	34.7665	56.6634	31.3091	0	66	67.6696	54.0225	1.81644	0.871354	2.2116	1.54547	1.96042	2.59637	2.93143	1.21084	2.54797	3.32495	1.72084	2.47563	1.82982	0	3.29866	2.64328	2.40007	1.63313	2.03409	2.23008	2.50714	1.70949	2.52168	0.68867
AT1G03475.1	Encodes coproporphyrinogen III oxidase, a key enzyme in the biosynthetic pathway of chlorophyll and heme, a tetrapyrrole pathway. Mutants express cytological and molecular markers associated with the defense responses, usually activated by pathogen infection.	LESION INITIATION 2 (LIN2); FUNCTIONS IN: coproporphyrinogen oxidase activity; INVOLVED IN: tetrapyrrole biosynthetic process; LOCATED IN: apoplast, chloroplast stroma, chloroplast, plastid; EXPRESSED IN: 23 plant structures; EXPRESSED DURING: 14 growth stages; CONTAINS InterPro DOMAIN/s: Coproporphyrinogen III oxidase (InterPro:IPR001260), Coproporphyrinogen III oxidase, conserved site (InterPro…	LIN2	Coproporphyrinogen III oxidase	tetrapyrrole synthesis.coproporphyrinogen III oxidase				4363	4302	6831	5004	5383	5923	3535	3865	3446	4641	4131	4680	2913	3758	4259	5763	4626	129.695	134.966	174.739	208.497	224.399	187.466	124.442	127.303	137.243	155.742	161.181	161.313	134.198	151.43	167.955	177.689	161.977	146.467	206.787	129.663	159.412	151.194	169.833	24.626
AT1G03490.1		NAC domain containing protein 6 (NAC006); FUNCTIONS IN: sequence-specific DNA binding transcription factor activity; INVOLVED IN: multicellular organismal development, regulation of transcription; EXPRESSED IN: cultured cell; CONTAINS InterPro DOMAIN/s: No apical meristem (NAM) protein (InterPro:IPR003441); BEST Arabidopsis thaliana protein match is: TCV-interacting protein (TAIR:AT5G24590.2); Ha…	NAC006	NAC domain containing protein 6	development.unspecified				1	0	1	0	0	0	0	0	0	0	0	1	0	0	0	1	1.00032	0.0554749	0	0.0477296	0	0	0	0	0	0	0	0	0.0644791	0	0	0	0.0575818	0.0657387	0.0344015	0	0	0.021493	0	0.0616602	0.0300432
AT1G03495.1		HXXXD-type acyl-transferase family protein; FUNCTIONS IN: transferase activity, transferring acyl groups other than amino-acyl groups, transferase activity; INVOLVED IN: biological_process unknown; CONTAINS InterPro DOMAIN/s: Transferase (InterPro:IPR003480); BEST Arabidopsis thaliana protein match is: HXXXD-type acyl-transferase family protein (TAIR:AT1G03940.1); Has 1920 Blast hits to 1905 prot…	AT1G03495	HXXXD-type acyl-transferase family protein	secondary metabolism.flavonoids.anthocyanins.anthocyanin 5-aromatic acyltransferase				580.241	481.348	501.668	597.416	231.058	858.938	241.91	170.736	126.607	284.54	262.174	404.3	96.5226	197.591	239.802	224.943	429.547	13.9645	12.2209	10.39	20.1503	7.79269	21.9943	6.8958	4.54969	4.08	7.7096	8.27252	11.2766	3.59601	6.44467	7.65289	5.61424	12.1616	12.1918	16.6458	5.17516	9.08624	5.89786	8.88792	1.78743
AT1G03510.1		Tetratricopeptide repeat (TPR)-like superfamily protein; FUNCTIONS IN: binding; INVOLVED IN: biological_process unknown; LOCATED IN: cellular_component unknown; EXPRESSED IN: 10 plant structures; EXPRESSED DURING: 6 growth stages; CONTAINS InterPro DOMAIN/s: Pentatricopeptide repeat (InterPro:IPR002885), Tetratricopeptide-like helical (InterPro:IPR011990); BEST Arabidopsis thaliana protein match …	AT1G03510	Tetratricopeptide repeat (TPR)-like superfamily protein	not assigned.no ontology.pentatricopeptide (PPR) repeat-containing protein				30	31	52	27	35	30	19	25	25	34	34	28	11	19	35	40	51	1.01549	1.10782	1.51465	1.28116	1.66228	1.0818	0.761539	0.938143	1.13426	1.30182	1.51185	1.09942	0.57753	0.871959	1.57221	1.40455	2.03531	1.21265	1.34175	0.944647	1.30436	1.00723	1.71993	0.26558
AT1G03515.1		tRNA-Asp (anticodon: GTC)	AT1G03515	tRNA-Asp	protein.synthesis.transfer RNA.nucleus.tRNA-Asp				0	0	0	0	0	0	0.047619	0	0	0	0.047619	0.047619	0	0	0	0	0	0	0	0	0	0	0	0.0865053	0	0	0	0.0907171	0.0866525	0	0	0	0	0	0	0	0.0288351	0.0591232	0	0	0
AT1G03520.1		Core-2/I-branching beta-1,6-N-acetylglucosaminyltransferase family protein; FUNCTIONS IN: transferase activity, transferring glycosyl groups, acetylglucosaminyltransferase activity; INVOLVED IN: carbohydrate biosynthetic process; LOCATED IN: membrane; EXPRESSED IN: 22 plant structures; EXPRESSED DURING: 13 growth stages; CONTAINS InterPro DOMAIN/s: Glycosyl transferase, family 14 (InterPro:IPR003…	AT1G03520	Core-2/I-branching beta-1,6-N-acetylglucosaminyltransferase family protein	misc.UDP glucosyl and glucoronyl transferases				286.63	229.197	380.044	228.02	225.769	326.522	164.63	154.862	110.244	314.765	275.967	282.561	178.414	149.086	164.191	358.471	298.811	5.8657	4.94668	6.69305	6.5392	6.47169	7.10629	3.9909	3.50743	3.01982	7.23946	7.39907	6.69918	5.64792	4.1342	4.45435	7.60694	7.1881	5.83514	6.70573	3.50605	7.11257	4.74549	7.39752	0.873586
AT1G03520.2		Core-2/I-branching beta-1,6-N-acetylglucosaminyltransferase family protein; FUNCTIONS IN: transferase activity, transferring glycosyl groups, acetylglucosaminyltransferase activity; INVOLVED IN: carbohydrate biosynthetic process; LOCATED IN: membrane; EXPRESSED IN: 22 plant structures; EXPRESSED DURING: 13 growth stages; CONTAINS InterPro DOMAIN/s: Glycosyl transferase, family 14 (InterPro:IPR003…	AT1G03520	Core-2/I-branching beta-1,6-N-acetylglucosaminyltransferase family protein	misc.UDP glucosyl and glucoronyl transferases				73.37	49.8034	51.9559	45.9796	73.2312	62.4783	22.3698	12.1379	66.7559	55.235	30.0332	72.4394	8.58624	48.9135	56.8085	127.529	106.189	2.2576	1.61747	1.37571	1.98311	3.16038	2.04719	0.815108	0.413882	2.75232	1.91962	1.21321	2.58482	0.409534	2.04028	2.31912	4.07026	3.84962	1.75026	2.39689	1.3271	1.90588	1.58964	3.95994	0.455694
AT1G03530.1		nuclear assembly factor 1 (NAF1); FUNCTIONS IN: snoRNA binding, pseudouridine synthase activity; INVOLVED IN: biological_process unknown; LOCATED IN: box H/ACA snoRNP complex; EXPRESSED IN: 23 plant structures; EXPRESSED DURING: 13 growth stages; CONTAINS InterPro DOMAIN/s: H/ACA ribonucleoprotein complex, subunit Gar1/Naf1 (InterPro:IPR007504); Has 55446 Blast hits to 31211 proteins in 1683 spec…	NAF1	nuclear assembly factor 1	RNA.processing				393.872	452.701	392	264	261	337.93	278.615	276	284.678	442	354	343.5	151	230	382	333.218	355	6.19823	7.51062	5.30889	5.82134	5.7498	5.65213	5.19451	4.80409	5.9936	7.79961	7.29176	6.2598	3.67233	4.90358	7.96622	5.43677	6.56007	6.33925	5.74109	5.33073	7.11706	5.51404	5.99842	1.10762
AT1G03540.1		Pentatricopeptide repeat (PPR-like) superfamily protein; CONTAINS InterPro DOMAIN/s: Pentatricopeptide repeat (InterPro:IPR002885); BEST Arabidopsis thaliana protein match is: Pentatricopeptide repeat (PPR) superfamily protein (TAIR:AT2G13600.1); Has 43035 Blast hits to 14042 proteins in 228 species: Archae - 0; Bacteria - 19; Metazoa - 59; Fungi - 97; Plants - 42229; Viruses - 0; Other Eukaryote…	AT1G03540	Pentatricopeptide repeat (PPR-like) superfamily protein	not assigned.no ontology.pentatricopeptide (PPR) repeat-containing protein				54	38	35	39	38	41	24	18	13	43	36	25	19	11	20	28	37	1.24	0.920454	0.691642	1.25508	1.22265	1.00157	0.652784	0.457596	0.399677	1.11106	1.0836	0.665243	0.675245	0.34231	0.608944	0.666769	0.999285	0.950699	1.15977	0.503352	0.953301	0.542166	0.833027	0.275427
AT1G03545.1	Potential natural antisense gene, locus overlaps with AT1G03550		AT1G03545	Natural antisense transcript overlaps with AT1G03550	micro RNA, natural antisense etc				20.0708	31.2247	30.1103	29	25	35	10.0573	17	14.11	30.0824	21	26.154	10.0706	13.0832	21	29.0985	20	0.721855	1.18578	0.931852	1.46213	1.26189	1.34134	0.428271	0.677988	0.680332	1.22506	0.992565	1.09134	0.562018	0.638001	1.00245	1.08569	0.848441	0.946496	1.35512	0.59553	1.10299	0.734156	0.967066	0.232309
AT1G03550.1		Secretory carrier membrane protein (SCAMP) family protein; FUNCTIONS IN: transmembrane transporter activity; INVOLVED IN: protein transport; LOCATED IN: integral to membrane; EXPRESSED IN: 23 plant structures; EXPRESSED DURING: 15 growth stages; CONTAINS InterPro DOMAIN/s: SCAMP (InterPro:IPR007273); BEST Arabidopsis thaliana protein match is: Secretory carrier membrane protein (SCAMP) family pro…	SCAMP4	Secretory carrier membrane protein (SCAMP) family protein	transport.misc				271.929	254.775	250.89	182	205	321	170.943	137	117.89	345.918	232	323.846	136.929	148.917	210	274.901	227	9.47083	9.36853	7.5191	8.88579	10.0189	11.9113	7.0494	5.29028	5.50386	13.6341	10.6164	13.0846	7.39844	7.032	9.70667	9.93216	9.32299	8.78615	10.272	5.94785	12.445	8.0457	9.62758	1.09849
AT1G03560.1		Pentatricopeptide repeat (PPR-like) superfamily protein; CONTAINS InterPro DOMAIN/s: Pentatricopeptide repeat (InterPro:IPR002885); BEST Arabidopsis thaliana protein match is: Tetratricopeptide repeat (TPR)-like superfamily protein (TAIR:AT5G39710.1); Has 53521 Blast hits to 15193 proteins in 316 species: Archae - 3; Bacteria - 91; Metazoa - 613; Fungi - 824; Plants - 50230; Viruses - 0; Other Eu…	AT1G03560	Pentatricopeptide repeat (PPR-like) superfamily protein	not assigned.no ontology.pentatricopeptide (PPR) repeat-containing protein				212	237	233	166	139	227	173	135	159	234	223	208	150	178	154	268	244	3.8848	4.5795	3.67441	4.26259	3.56687	4.42257	3.75553	2.73714	3.8991	4.81421	5.35151	4.41491	4.25011	4.41948	3.74039	5.09213	5.25337	4.04624	4.08401	3.46392	4.86021	4.13666	5.17275	0.473649
AT1G03570.1		tRNA-Gln (anticodon: CTG)	AT1G03570	tRNA-Gln	protein.synthesis.transfer RNA.nucleus.tRNA-Gln				0	0	0	0	0	0.5	0	0	0	0	0	0	1	0.5	0	0	0.5	0	0	0	0	0	0.675979	0	0	0	0	0	0	2.70366	1.12394	0	0	0.902345	0	0.225326	0	0	1.27587	0.451172	0
AT1G03580.1		pseudogene, meprin and TRAF homology (MATH) domain protein -related, weak similarity to ubiquitin-specific protease 12 (Arabidopsis thaliana) GI:11993471; contains weak hit to Pfam PF00917: MATH domain	AT1G03580	pseudogene of MATH domain/coiled-coil protein	not assigned.no ontology				4	16	7	6	6	7	2	3	14	7	15	8	8	3	7	15	11	0.14618	0.617428	0.220126	0.307389	0.307756	0.27261	0.0865373	0.121582	0.685945	0.28974	0.720482	0.339216	0.45371	0.148656	0.339549	0.568689	0.474223	0.327911	0.295918	0.298021	0.449813	0.313972	0.521456	0.25344
AT1G03590.1		Protein phosphatase 2C family protein; FUNCTIONS IN: protein serine/threonine phosphatase activity, catalytic activity; INVOLVED IN: N-terminal protein myristoylation; LOCATED IN: plasma membrane; EXPRESSED IN: 23 plant structures; EXPRESSED DURING: 13 growth stages; CONTAINS InterPro DOMAIN/s: Protein phosphatase 2C-related (InterPro:IPR001932), Protein phosphatase 2C (InterPro:IPR015655), Prote…	AT1G03590	Protein phosphatase 2C family protein	protein.postranslational modification				683	433	572	319	286	390	365	367	381	551	401	408	353	388	380	453	414	14.2187	9.50703	10.2477	9.30647	8.34024	8.63486	9.00098	8.45609	10.6171	12.8939	10.9379	9.84066	11.3686	10.9454	10.4874	9.77909	10.1319	11.3245	8.76052	9.35806	11.2242	10.9338	9.9555	2.53368
AT1G03600.1		PSB27; FUNCTIONS IN: molecular_function unknown; INVOLVED IN: photosystem II repair; LOCATED IN: thylakoid, chloroplast thylakoid membrane, chloroplast thylakoid lumen, chloroplast photosystem II, chloroplast; EXPRESSED IN: 23 plant structures; EXPRESSED DURING: 13 growth stages; Has 273 Blast hits to 273 proteins in 82 species: Archae - 0; Bacteria - 114; Metazoa - 0; Fungi - 0; Plants - 63; Vir…	PSB27	photosystem II family protein	PS.lightreaction.photosystem II.PSII polypeptide subunits				6536	6455	10292	4691	4858	6174	4421	5987	5461	4446	4322	5242	5028	6212	6304	6538	4815	400.629	418.586	542.757	403.317	419.238	404.556	320.599	408.231	449.91	312.397	349.911	373.668	480.611	516.801	513.876	416.041	350.085	453.991	409.037	392.913	345.325	503.763	383.063	77.3964
AT1G03610.1		Protein of unknown function (DUF789); CONTAINS InterPro DOMAIN/s: Protein of unknown function DUF789 (InterPro:IPR008507); BEST Arabidopsis thaliana protein match is: Protein of unknown function (DUF789) (TAIR:AT4G03420.1); Has 266 Blast hits to 262 proteins in 19 species: Archae - 0; Bacteria - 0; Metazoa - 0; Fungi - 0; Plants - 263; Viruses - 0; Other Eukaryotes - 3 (source: NCBI BLink).	AT1G03610	plant/protein (DUF789)	not assigned.unknown				630	536	693	398	322	603	357	360	365	538	481	479	409	415	417	469	449	15.938	14.3063	15.0871	14.1116	11.4174	16.2334	10.697	10.0857	12.3659	15.3322	15.9579	14.0455	16.0214	14.2292	13.9903	12.3051	13.3667	15.1105	13.9208	11.0495	15.1119	14.747	12.8359	0.816101
AT1G03620.1		ELMO/CED-12 family protein; FUNCTIONS IN: molecular_function unknown; INVOLVED IN: phagocytosis; LOCATED IN: cytoskeleton; EXPRESSED IN: 16 plant structures; EXPRESSED DURING: 6 growth stages; CONTAINS InterPro DOMAIN/s: Engulfment/cell motility, ELMO (InterPro:IPR006816); BEST Arabidopsis thaliana protein match is: ELMO/CED-12 family protein (TAIR:AT3G03610.1); Has 828 Blast hits to 828 proteins…	AT1G03620	ELMO/CED-12 family protein	not assigned.no ontology				42	29	17	21	19	23	32	14	15	43	33	22	37	11	14	21	25	2.28394	1.66748	0.795386	1.60154	1.4534	1.33586	2.05916	0.84616	1.09558	2.67143	2.36697	1.39039	3.13333	0.811651	1.01191	1.1853	1.6101	1.58227	1.4636	1.33363	2.14293	1.6523	1.3977	0.747926
AT1G03630.1	Encodes for a protein with protochlorophyllide oxidoreductase activity. The enzyme is NADPH- and light-dependent.	protochlorophyllide oxidoreductase C (POR C); FUNCTIONS IN: oxidoreductase activity, NADPH dehydrogenase activity, protochlorophyllide reductase activity; INVOLVED IN: chlorophyll biosynthetic process; LOCATED IN: chloroplast thylakoid membrane, chloroplast, chloroplast envelope; EXPRESSED IN: 22 plant structures; EXPRESSED DURING: 13 growth stages; CONTAINS InterPro DOMAIN/s: NAD(P)-binding doma…	POR C	protochlorophyllide oxidoreductase C	tetrapyrrole synthesis.protochlorophyllide reductase				4097.19	3090.57	5856.93	3490.32	3724.83	5063.63	2290.03	2705.38	2576.86	2726.93	2721.36	3360.83	2435.61	2901.55	3219.78	3837.65	3684.66	127.085	101.182	156.329	151.75	162.048	167.257	84.1142	92.9943	107.1	95.5447	110.821	120.89	117.11	122.004	132.503	123.47	134.66	128.199	160.352	94.7362	109.085	123.872	129.065	27.5904
AT1G03630.2	Encodes for a protein with protochlorophyllide oxidoreductase activity. The enzyme is NADPH- and light-dependent.	protochlorophyllide oxidoreductase C (POR C); FUNCTIONS IN: oxidoreductase activity, NADPH dehydrogenase activity, protochlorophyllide reductase activity; INVOLVED IN: chlorophyll biosynthetic process; LOCATED IN: chloroplast thylakoid membrane, chloroplast; EXPRESSED IN: 22 plant structures; EXPRESSED DURING: 13 growth stages; CONTAINS InterPro DOMAIN/s: Light-dependent protochlorophyllide reduc…	POR C	protochlorophyllide oxidoreductase C	tetrapyrrole synthesis.protochlorophyllide reductase				182.808	60.4313	250.066	110.681	183.167	229.367	94.9746	71.6172	95.1429	67.0699	140.638	119.171	132.394	115.452	156.223	185.347	102.341	5.73954	2.00268	6.7561	4.87093	8.06635	7.66914	3.53105	2.49194	4.00281	2.3791	5.79756	4.33913	6.4441	4.91389	6.50773	6.03614	3.78615	4.83277	6.86881	3.34193	4.17193	5.95524	4.91115	2.50308
AT1G03640.1		tRNA-Phe (anticodon: GAA)	AT1G03640	tRNA-Phe	protein.synthesis.transfer RNA.nucleus.tRNA-Phe				0	0	0.133333	0	0	0	0	0	0	0	0	0.0666667	0	0.0550016	0	0	0	0	0	0.185669	0	0	0	0	0	0	0	0	0.121089	0	0.123934	0	0	0	0.0618897	0	0	0.040363	0.0413113	0	0.107196
AT1G03650.1		Acyl-CoA N-acyltransferases (NAT) superfamily protein; FUNCTIONS IN: N-acetyltransferase activity; INVOLVED IN: metabolic process; LOCATED IN: cellular_component unknown; CONTAINS InterPro DOMAIN/s: GCN5-related N-acetyltransferase, C-terminal (InterPro:IPR022610), GCN5-related N-acetyltransferase (InterPro:IPR000182), Acyl-CoA N-acyltransferase (InterPro:IPR016181); Has 3295 Blast hits to 3295 p…	AT1G03650	Acyl-CoA N-acyltransferases (NAT) superfamily protein	RNA.regulation of transcription.Histone acetyltransferases				50	69	56	92	82	94	58	46	42	89	87	106	21	58	65	109	88	3.00273	4.3834	2.89343	7.74947	6.93211	6.03374	4.12099	3.07258	3.38972	6.12321	6.89921	7.40218	1.96619	4.72731	5.19074	6.79545	6.26695	3.42652	6.90511	3.52776	6.8082	3.96141	6.5312	0.830482
AT1G03660.1		Ankyrin-repeat containing protein; BEST Arabidopsis thaliana protein match is: ankyrin repeat family protein (TAIR:AT1G03670.1); Has 105 Blast hits to 104 proteins in 3 species: Archae - 0; Bacteria - 0; Metazoa - 0; Fungi - 0; Plants - 105; Viruses - 0; Other Eukaryotes - 0 (source: NCBI BLink).	AT1G03660	Ankyrin-repeat containing protein	not assigned.unknown				14	13	13	6	12	10	36	15	22	33	19	18	12	15	12	17	11	3.09645	3.08086	2.47633	1.87397	3.80709	2.41305	9.39567	3.76258	6.63931	8.95401	5.71842	4.70043	4.27687	4.5305	3.58211	3.92765	2.9827	2.88455	2.69804	6.59919	6.45762	4.12983	3.45518	0.353612
AT1G03670.1	Ankyrin repeat containing protein	ankyrin repeat family protein; CONTAINS InterPro DOMAIN/s: Ankyrin repeat-containing domain (InterPro:IPR020683), Ankyrin repeat (InterPro:IPR002110); BEST Arabidopsis thaliana protein match is: Ankyrin repeat family protein (TAIR:AT4G03500.1); Has 38664 Blast hits to 17395 proteins in 690 species: Archae - 39; Bacteria - 2692; Metazoa - 19825; Fungi - 3120; Plants - 3302; Viruses - 203; Other Eu…	AT1G03670	ankyrin repeat family protein	cell.organisation				0	1	2	1	1	0	1	0	0	0	0	0	0	0	0	0	1	0	0.0239227	0.0390342	0.0317837	0.0317765	0	0.0268636	0	0	0	0	0	0	0	0	0	0.0266724	0.0209856	0.0211867	0.00895453	0	0	0.0133362	0.0196821
AT1G03680.1	encodes a chloroplast thioredoxin similar to prokaryotic thioredoxins.	thioredoxin M-type 1 (THM1); FUNCTIONS IN: enzyme activator activity; INVOLVED IN: response to oxidative stress, response to cold, positive regulation of catalytic activity; LOCATED IN: thylakoid, apoplast, stromule, chloroplast, chloroplast stroma; EXPRESSED IN: 24 plant structures; EXPRESSED DURING: 14 growth stages; CONTAINS InterPro DOMAIN/s: Thioredoxin fold (InterPro:IPR012335), Thioredoxin…	THM1	thioredoxin M-type 1	redox.thioredoxin				6253	7593	12206	8311	8653	11638	5759	7574	6434	8314	8163	9957	5557	6875	6897	11844	8665	317.634	407.72	533.479	592.025	618.027	631.131	346.21	427.424	438.814	481.65	546.541	587.627	439.277	473.796	465.539	624.408	520.884	419.611	613.728	404.149	538.606	459.537	572.646	108.413
AT1G03687.1		DTW domain-containing protein; CONTAINS InterPro DOMAIN/s: DTW (InterPro:IPR005636); Has 580 Blast hits to 580 proteins in 298 species: Archae - 0; Bacteria - 527; Metazoa - 0; Fungi - 0; Plants - 28; Viruses - 0; Other Eukaryotes - 25 (source: NCBI BLink).	AT1G03687	DTW domain-containing protein	not assigned.no ontology				310.037	278.343	366.115	251.142	271.381	297.471	219.139	239.778	179.823	298.264	267.871	291.724	177.004	219.491	279.035	347.312	263.755	9.91988	9.40072	10.0802	11.2636	12.1802	10.1369	8.3027	8.50303	7.71033	10.7851	11.2546	10.8253	8.78092	9.52058	11.8461	11.5269	9.94532	9.80027	11.1936	8.17202	10.955	10.0492	10.7361	0.355181
AT1G03687.2		DTW domain-containing protein; CONTAINS InterPro DOMAIN/s: DTW (InterPro:IPR005636); Has 477 Blast hits to 477 proteins in 253 species: Archae - 0; Bacteria - 432; Metazoa - 0; Fungi - 0; Plants - 26; Viruses - 0; Other Eukaryotes - 19 (source: NCBI BLink).	AT1G03687	DTW domain-containing protein	not assigned.no ontology				7.96272	3.65697	3.88487	19.8576	4.61883	10.5286	7.86109	7.22212	14.1766	13.7356	10.1292	28.2759	6.99604	14.5091	13.9646	23.6881	4.24505	0.240409	0.11653	0.100932	0.840357	0.19557	0.338474	0.281063	0.241617	0.573478	0.468261	0.401439	0.98994	0.327377	0.593815	0.559345	0.741816	0.150981	0.152624	0.458134	0.365386	0.61988	0.493512	0.446398	0.0764233
AT1G03700.1		Uncharacterised protein family (UPF0497); FUNCTIONS IN: molecular_function unknown; INVOLVED IN: biological_process unknown; LOCATED IN: endomembrane system; EXPRESSED IN: hypocotyl, flower; EXPRESSED DURING: petal differentiation and expansion stage; CONTAINS InterPro DOMAIN/s: Uncharacterised protein family UPF0497, trans-membrane plant (InterPro:IPR006702), Uncharacterised protein family UPF04…	AT1G03700	Uncharacterized protein family (UPF0497)	not assigned.no ontology				0	0	0	0	0	0	1	0	0	3	1	0	0	0	0	0	0	0	0	0	0	0	0	0.0932282	0	0	0.273492	0.104505	0	0	0	0	0	0	0	0	0.0310761	0.125999	0	0	0
AT1G03710.1		Cystatin/monellin superfamily protein; FUNCTIONS IN: cysteine-type endopeptidase inhibitor activity; INVOLVED IN: biological_process unknown; LOCATED IN: cellular_component unknown; EXPRESSED IN: 10 plant structures; EXPRESSED DURING: 8 growth stages; CONTAINS InterPro DOMAIN/s: Proteinase inhibitor I25, cystatin (InterPro:IPR000010), Proteinase inhibitor I25, cystatin, conserved region (InterPro…	AT1G03710	Cystatin/monellin superfamily protein	not assigned.unknown				0	3.75266	11.3026	0	0	0	0	0	6	6	6	0	3.7318	8	6	0	0	0	0.189713	0.465196	0	0	0	0	0	0.385236	0.326854	0.378072	0	0.277657	0.519115	0.381289	0	0	0.218303	0	0.128412	0.234975	0.392687	0	0.233912
AT1G03710.2		Cystatin/monellin superfamily protein; FUNCTIONS IN: cysteine-type endopeptidase inhibitor activity; INVOLVED IN: biological_process unknown; LOCATED IN: cellular_component unknown; EXPRESSED IN: 10 plant structures; EXPRESSED DURING: 8 growth stages; CONTAINS InterPro DOMAIN/s: Proteinase inhibitor I25, cystatin (InterPro:IPR000010), Proteinase inhibitor I25, cystatin, conserved region (InterPro…	AT1G03710	Cystatin/monellin superfamily protein	not assigned.unknown				7	3.24734	4.69743	3	4	1	3	4	0	0	0	3	5.2682	0	0	4	4	0.455888	0.223806	0.263199	0.274075	0.366945	0.069655	0.231121	0.289931	0	0	0	0.227297	0.535454	0	0	0.270475	0.309269	0.314298	0.236892	0.173684	0.0757657	0.178485	0.289872	0.124193
AT1G03720.1		Cysteine proteinases superfamily protein; FUNCTIONS IN: cysteine-type peptidase activity; INVOLVED IN: proteolysis; LOCATED IN: cellular_component unknown; EXPRESSED IN: ovule, seed; EXPRESSED DURING: E expanded cotyledon stage; CONTAINS InterPro DOMAIN/s: Peptidase C1A, papain (InterPro:IPR013128), Peptidase C1A, papain C-terminal (InterPro:IPR000668); BEST Arabidopsis thaliana protein match is:…	AT1G03720	Cysteine proteinases superfamily protein	protein.degradation.cysteine protease				0	0	0	0	0	0	0	2	0	0	0	0	0	0	0	0	0	0	0	0	0	0	0	0	0.127202	0	0	0	0	0	0	0	0	0	0	0	0.0424007	0	0	0	0
AT1G03730.1		unknown protein; BEST Arabidopsis thaliana protein match is: unknown protein (TAIR:AT4G03600.1); Has 50 Blast hits to 50 proteins in 10 species: Archae - 0; Bacteria - 0; Metazoa - 0; Fungi - 0; Plants - 50; Viruses - 0; Other Eukaryotes - 0 (source: NCBI BLink).	AT1G03730	pyrroline-5-carboxylate reductase	not assigned.unknown				85	159	103	109	99	149	115	120	87.0235	148	135	154	60	92	92	157	118	3.5738	7.06201	3.7263	6.4254	5.84618	6.68062	5.72374	5.599	4.90821	7.0666	7.46833	7.51645	3.91924	5.24598	5.13642	6.84911	5.85981	4.78737	6.3174	5.41032	7.35046	4.76721	6.35446	1.97137
AT1G03740.1		Protein kinase superfamily protein; FUNCTIONS IN: protein serine/threonine kinase activity, protein kinase activity, kinase activity, ATP binding; INVOLVED IN: protein amino acid phosphorylation, N-terminal protein myristoylation; EXPRESSED IN: 24 plant structures; EXPRESSED DURING: 13 growth stages; CONTAINS InterPro DOMAIN/s: Protein kinase, ATP binding site (InterPro:IPR017441), Protein kinase…	AT1G03740	Protein kinase superfamily protein	protein.postranslational modification				512.312	1107.35	553.606	555.268	550.203	1121	543.464	435.916	442	1064.36	834.87	1004.75	281	521.059	435.393	806.723	715.51	6.89187	15.7023	6.40937	10.4662	10.3586	16.0235	8.66226	6.48441	7.95326	16.0382	14.6941	15.6491	5.83932	9.49561	7.76039	11.2512	11.2971	9.66785	12.2828	7.69998	15.4605	7.69844	11.2742	5.23156
AT1G03740.2		Protein kinase superfamily protein; FUNCTIONS IN: protein serine/threonine kinase activity, protein kinase activity, kinase activity, ATP binding; INVOLVED IN: protein amino acid phosphorylation; EXPRESSED IN: 24 plant structures; EXPRESSED DURING: 13 growth stages; CONTAINS InterPro DOMAIN/s: Protein kinase, ATP binding site (InterPro:IPR017441), Serine/threonine-protein kinase domain (InterPro:…	AT1G03740	Protein kinase superfamily protein	protein.postranslational modification				8.68757	49.6476	8.39417	19.732	9.79724	0	32.5365	17.0845	0	9.63508	73.1298	25.2526	0	9.9409	25.6067	35.2773	37.4899	0.113619	0.684405	0.0944805	0.361579	0.179312	0	0.50418	0.247058	0	0.141121	1.25122	0.382359	0	0.176118	0.443703	0.478315	0.575412	0.297501	0.180297	0.250413	0.591567	0.206607	0.526864	0.335205
AT1G03750.1		switch 2 (SWI2); FUNCTIONS IN: helicase activity, DNA binding, ATP binding, nucleic acid binding; LOCATED IN: membrane; EXPRESSED IN: 24 plant structures; EXPRESSED DURING: 15 growth stages; CONTAINS InterPro DOMAIN/s: DEAD-like helicase, N-terminal (InterPro:IPR014001), DNA/RNA helicase, C-terminal (InterPro:IPR001650), Helicase, superfamily 1/2, ATP-binding domain (InterPro:IPR014021), SNF2-rel…	SWI2	switch 2	DNA.synthesis/chromatin structure				175	198	185	174	163	240	136	125	116	228	225	261	119	149	143.326	245	216	2.66473	3.17845	2.42434	3.7125	3.47436	3.88393	2.45351	2.10517	2.36304	3.89208	4.48405	4.6021	2.80007	3.07373	2.89201	3.86789	3.86178	2.75584	3.69026	2.30724	4.32608	2.92194	3.86483	0.385222
AT1G03760.1		Prefoldin chaperone subunit family protein; FUNCTIONS IN: unfolded protein binding; INVOLVED IN: protein folding; LOCATED IN: prefoldin complex; EXPRESSED IN: pollen tube; CONTAINS InterPro DOMAIN/s: Prefoldin alpha-like (InterPro:IPR004127), Prefoldin (InterPro:IPR009053); Has 429 Blast hits to 422 proteins in 142 species: Archae - 27; Bacteria - 8; Metazoa - 215; Fungi - 17; Plants - 37; Viruse…	AT1G03760	Prefoldin chaperone subunit family protein	not assigned.no ontology				144	188	156	175	164	242	167	138	123	191	191	223	66	123	143.674	219	203	4.51008	6.21506	4.20443	7.68277	7.20459	8.07173	6.19376	4.79001	5.16216	6.75838	7.85434	8.09981	3.20458	5.22239	5.97034	7.11471	7.49166	4.97652	7.65303	5.38198	7.57084	4.7991	7.30319	1.08344
AT1G03770.1	Encodes a nuclear localized protein with similarity to animal polycomb repressive core complex1 (PRC1) core component RING.Appears to function redundantly with ATRING1a, a close paralog. Both interact physically with CLF and LHP1 and appear to function together to repress class I KNOX gene expression.	RING 1B (RING1B); FUNCTIONS IN: zinc ion binding; INVOLVED IN: negative regulation of gene expression, epigenetic; LOCATED IN: nucleus, PRC1 complex; EXPRESSED IN: 15 plant structures; EXPRESSED DURING: 8 growth stages; CONTAINS InterPro DOMAIN/s: Zinc finger, RING-type, conserved site (InterPro:IPR017907), Zinc finger, RING-type (InterPro:IPR001841), Zinc finger, C3HC4 RING-type (InterPro:IPR018…	RING1B	RING 1B	protein.degradation.ubiquitin.E3.RING				110.163	77.4338	39.9146	61.4981	75.1597	86.9213	50.4128	31.9133	28.9053	92.5422	78.5462	47.2143	35.0558	26.8164	36.8493	75.2455	65.593	2.90911	2.15755	0.907055	2.27614	2.78221	2.44294	1.57671	0.933397	1.02234	2.7544	2.72072	1.44528	1.43372	0.95981	1.2906	2.06081	2.03879	1.99124	2.50043	1.17748	2.3068	1.22804	2.0498	1.01134
AT1G03770.2	Encodes a nuclear localized protein with similarity to animal polycomb repressive core complex1 (PRC1) core component RING.Appears to function redundantly with ATRING1a, a close paralog. Both interact physically with CLF and LHP1 and appear to function together to repress class I KNOX gene expression.	RING 1B (RING1B); FUNCTIONS IN: zinc ion binding; INVOLVED IN: negative regulation of gene expression, epigenetic; LOCATED IN: nucleus, PRC1 complex; EXPRESSED IN: 15 plant structures; EXPRESSED DURING: 8 growth stages; CONTAINS InterPro DOMAIN/s: Zinc finger, RING-type, conserved site (InterPro:IPR017907), Zinc finger, RING-type (InterPro:IPR001841), Zinc finger, C3HC4 RING-type (InterPro:IPR018…	RING1B	RING 1B	protein.degradation.ubiquitin.E3.RING				59.8375	30.5662	35.8552	32.1922	19.8403	12.0787	27.8576	30.0867	30.0947	37.4578	17.4538	12.8196	7.75154	31.1836	9.84106	31.7545	22.407	1.52986	0.82451	0.788874	1.15354	0.710981	0.328633	0.843559	0.851875	1.03043	1.07896	0.585232	0.3799	0.306882	1.08055	0.333677	0.841983	0.674171	1.04775	0.731051	0.908621	0.681364	0.573703	0.758077	0.417901
AT1G03770.3	Encodes a nuclear localized protein with similarity to animal polycomb repressive core complex1 (PRC1) core component RING.Appears to function redundantly with ATRING1a, a close paralog. Both interact physically with CLF and LHP1 and appear to function together to repress class I KNOX gene expression.	RING 1B (RING1B); FUNCTIONS IN: zinc ion binding; INVOLVED IN: negative regulation of gene expression, epigenetic; LOCATED IN: nucleus, PRC1 complex; EXPRESSED IN: 15 plant structures; EXPRESSED DURING: 8 growth stages; CONTAINS InterPro DOMAIN/s: Zinc finger, RING-type, conserved site (InterPro:IPR017907), Zinc finger, RING-type (InterPro:IPR001841), Zinc finger, C3HC4 RING-type (InterPro:IPR018…	RING1B	RING 1B	protein.degradation.ubiquitin.E3.RING				0	0	13.2301	6.30967	1.04552e-07	0	7.72961	0	4.43819e-06	0	0	18.9661	9.1927	0	10.3096	0	0	0	0	0.296791	0.230529	3.82036e-09	0	0.238647	0	1.5495e-07	0	0	0.573095	0.37111	0	0.356433	0	0	0.0989303	0.076843	0.0795491	0.191032	0.242514	0	0.171352
AT1G03780.1	Homolog of vertebrate TPX2. Protein has three domains involved in nuclear targeting, one in nuclear export and two in microtubule binding. Involved in mitotic spindle assembly during late prophase and early prometaphase.	targeting protein for XKLP2 (TPX2); FUNCTIONS IN: microtubule binding; INVOLVED IN: spindle assembly; LOCATED IN: nucleus, chloroplast envelope; EXPRESSED IN: 14 plant structures; EXPRESSED DURING: 7 growth stages; CONTAINS InterPro DOMAIN/s: Cell cycle regulated microtubule associated protein (InterPro:IPR022021); BEST Arabidopsis thaliana protein match is: Cell cycle regulated microtubule assoc…	TPX2	targeting protein for XKLP2	cell.cycle				9.46087	4.62668	0	8.79656	5.02324	2.64313	4.91233	4.59646	2.23428	11.8066	7.45159	13.7898	2.33328	16.8917	0	0	8.3915	0.15502	0.0799281	0	0.201968	0.115233	0.0460346	0.0953593	0.0833115	0.0489828	0.216997	0.159837	0.261676	0.0590924	0.374986	0	0	0.161483	0.078316	0.121079	0.0758845	0.212837	0.144693	0.0807415	0.0775226
AT1G03780.2	Homolog of vertebrate TPX2. Protein has three domains involved in nuclear targeting, one in nuclear export and two in microtubule binding. Involved in mitotic spindle assembly during late prophase and early prometaphase.	targeting protein for XKLP2 (TPX2); CONTAINS InterPro DOMAIN/s: Cell cycle regulated microtubule associated protein (InterPro:IPR022021), Xklp2 targeting protein (InterPro:IPR009675); BEST Arabidopsis thaliana protein match is: TPX2 (targeting protein for Xklp2) protein family (TAIR:AT5G44270.1); Has 2017 Blast hits to 1530 proteins in 221 species: Archae - 5; Bacteria - 108; Metazoa - 882; Fungi…	TPX2	targeting protein for XKLP2	cell.cycle				215.024	132.46	187.284	166.194	142.308	124.687	266.786	123.168	56.6019	360.193	121.738	124.302	160.571	187.719	71.2782	150	136.379	3.48182	2.26136	2.6099	3.7709	3.22606	2.14605	5.11804	2.20613	1.22628	6.54166	2.58048	2.33098	4.01863	4.1182	1.52956	2.51835	2.59345	2.78436	3.04767	2.85015	3.81771	3.22213	2.5559	0.628656
AT1G03780.3	Homolog of vertebrate TPX2. Protein has three domains involved in nuclear targeting, one in nuclear export and two in microtubule binding. Involved in mitotic spindle assembly during late prophase and early prometaphase.	targeting protein for XKLP2 (TPX2); FUNCTIONS IN: microtubule binding; INVOLVED IN: spindle assembly; LOCATED IN: nucleus; EXPRESSED IN: 14 plant structures; EXPRESSED DURING: 7 growth stages; CONTAINS InterPro DOMAIN/s: Cell cycle regulated microtubule associated protein (InterPro:IPR022021), Xklp2 targeting protein (InterPro:IPR009675); BEST Arabidopsis thaliana protein match is: TPX2 (targetin…	TPX2	targeting protein for XKLP2	cell.cycle				43.5148	11.9138	8.716	12.0099	15.6691	23.6697	34.3016	15.2355	27.1638	0	36.8104	37.908	12.0957	20.3896	13.7218	0	34.2293	0.702557	0.202795	0.121106	0.271703	0.354168	0.406193	0.656116	0.27209	0.586778	0	0.777976	0.708782	0.30183	0.445999	0.293593	0	0.649007	0.342153	0.344021	0.504995	0.495586	0.347141	0.324504	0.31478
AT1G03790.1	Encodes SOMNUS (SOM), a nucleus-localized CCCH-type zinc finger protein. SOM negatively regulates light-dependent seed germination downstream of PIL5 (AT2G20180).	SOMNUS (SOM); CONTAINS InterPro DOMAIN/s: Zinc finger, CCCH-type (InterPro:IPR000571); BEST Arabidopsis thaliana protein match is: Zinc finger C-x8-C-x5-C-x3-H type family protein (TAIR:AT5G44260.1); Has 3270 Blast hits to 1059 proteins in 150 species: Archae - 0; Bacteria - 0; Metazoa - 444; Fungi - 30; Plants - 421; Viruses - 3; Other Eukaryotes - 2372 (source: NCBI BLink).	SOM	Zinc finger C-x8-C-x5-C-x3-H type family protein	RNA.regulation of transcription.C3H zinc finger family				2	1	0	2	2	1	4	2	0	19	9	6	1	0	3	0	8	0.0542263	0.0286093	0	0.0760024	0.0760196	0.0288588	0.128444	0.0600643	0	0.58082	0.320122	0.188586	0.0419971	0	0.107885	0	0.255345	0.0276119	0.0602936	0.0628361	0.363176	0.0499607	0.127672	0.0271269
AT1G03800.1	encodes a member of the ERF (ethylene response factor) subfamily B-1 of ERF/AP2 transcription factor family (ATERF-10). The protein contains one AP2 domain. There are 15 members in this subfamily including ATERF-3, ATERF-4, ATERF-7, and leafy petiole.	ERF domain protein 10 (ERF10); FUNCTIONS IN: transcription repressor activity, DNA binding, sequence-specific DNA binding transcription factor activity; INVOLVED IN: ethylene mediated signaling pathway, regulation of transcription, DNA-dependent; EXPRESSED IN: cultured cell; CONTAINS InterPro DOMAIN/s: DNA-binding, integrase-type (InterPro:IPR016177), Pathogenesis-related transcriptional factor/E…	ERF10	ERF domain protein 10	RNA.regulation of transcription.AP2/EREBP, APETALA2/Ethylene-responsive element binding protein family				3	4	19	3	1	8	12	11	2	3	6	8	5	5	8	1	6	0.197045	0.278039	1.07364	0.276413	0.0925242	0.562026	0.932344	0.804159	0.17664	0.226362	0.520974	0.61132	0.51258	0.445811	0.699025	0.0681959	0.467913	0.516241	0.310321	0.637714	0.452885	0.552472	0.268054	0.484417
AT1G03810.1		Nucleic acid-binding, OB-fold-like protein; CONTAINS InterPro DOMAIN/s: Nucleic acid-binding, OB-fold-like (InterPro:IPR016027), Nucleic acid-binding, OB-fold (InterPro:IPR012340); BEST Arabidopsis thaliana protein match is: Nucleic acid-binding, OB-fold-like protein (TAIR:AT4G28440.1); Has 209 Blast hits to 209 proteins in 44 species: Archae - 18; Bacteria - 0; Metazoa - 0; Fungi - 0; Plants - 1…	AT1G03810	Nucleic acid-binding, OB-fold-like protein	not assigned.no ontology				0	0	0	0	0	0	0	0	0	0	0	0	0	0	0	0	0	0	0	0	0	0	0	0	0	0	0	0	0	0	0	0	0	0	0	0	0	0	0	0	0
AT1G03820.1		unknown protein; FUNCTIONS IN: molecular_function unknown; INVOLVED IN: biological_process unknown; LOCATED IN: endomembrane system; EXPRESSED IN: 21 plant structures; EXPRESSED DURING: 13 growth stages; Has 1345 Blast hits to 1122 proteins in 102 species: Archae - 2; Bacteria - 28; Metazoa - 28; Fungi - 30; Plants - 109; Viruses - 0; Other Eukaryotes - 1148 (source: NCBI BLink).	AT1G03820	E6-like protein	not assigned.no ontology				150	111	190	141	147	246	477	438	411	957	533	590	167	212	95	320	247	8.15692	6.38243	8.88961	10.7532	11.2447	14.2879	30.6943	26.4727	30.0189	59.4548	38.2301	37.2877	14.1423	15.6427	6.86651	18.0618	15.9078	7.80965	12.0953	29.062	44.9909	12.2172	16.9848	1.28916
AT1G03830.1		guanylate-binding family protein; FUNCTIONS IN: GTP binding, GTPase activity; INVOLVED IN: immune response; LOCATED IN: cellular_component unknown; EXPRESSED IN: 12 plant structures; EXPRESSED DURING: 6 growth stages; CONTAINS InterPro DOMAIN/s: Guanylate-binding protein, N-terminal (InterPro:IPR015894), Guanylate-binding protein, C-terminal (InterPro:IPR003191); BEST Arabidopsis thaliana protein…	AT1G03830	guanylate-binding family protein	not assigned.no ontology				0.000147932	5.83342e-05	3.80899e-08	0.00129733	0.000111166	12.561	0.000106075	0.639572	0	0	0.00638261	0	0.0119625	28.7912	74.0961	6.32216e-07	0.000246129	1.95325e-06	8.1187e-07	4.32831e-10	2.40009e-05	2.05414e-06	0.176219	1.65947e-06	0.00933766	0	0	0.000110254	0	0.000243977	0.514973	1.29623	8.65425e-09	3.81402e-06	9.21851e-07	0.0587484	0.00311311	3.67513e-05	0.603816	1.91134e-06	9.81043e-07
AT1G03830.2		guanylate-binding family protein; FUNCTIONS IN: GTP binding, GTPase activity; INVOLVED IN: immune response; LOCATED IN: cellular_component unknown; EXPRESSED IN: 12 plant structures; EXPRESSED DURING: 6 growth stages; CONTAINS InterPro DOMAIN/s: Guanylate-binding protein, N-terminal (InterPro:IPR015894), Guanylate-binding protein, C-terminal (InterPro:IPR003191); BEST Arabidopsis thaliana protein…	AT1G03830	guanylate-binding family protein	not assigned.no ontology				236	196	231	192.999	198	215.439	187	112.36	129	202	143.994	174	118.988	98.2088	71.9039	248	274	2.89959	2.53816	2.4426	3.32241	3.40411	2.81212	2.72233	1.52631	2.11975	2.77843	2.31414	2.4749	2.25778	1.63452	1.17041	3.15889	3.95015	2.62678	3.17955	2.1228	2.52249	1.68757	3.55452	0.241041
AT1G03840.1	MGP is a nuclear-localized putative transcription factor with three zinc finger domains. MGP can interact with three proteins implicated in root patterning: SCR, SHR, and JKD in Y2H assays, and these interactions depend on the first zinc finger in MGP. MGP appears to be a direct transcriptional target of SHR and SCR, based on promoter binding assays, though it is not expressed in the QC, based on…	Magpie (MGP); CONTAINS InterPro DOMAIN/s: Zinc finger, C2H2-type (InterPro:IPR007087); BEST Arabidopsis thaliana protein match is: C2H2-like zinc finger protein (TAIR:AT5G44160.1); Has 50307 Blast hits to 19551 proteins in 373 species: Archae - 0; Bacteria - 2; Metazoa - 47709; Fungi - 273; Plants - 826; Viruses - 4; Other Eukaryotes - 1493 (source: NCBI BLink).	MGP	C2H2 and C2HC zinc fingers superfamily protein	RNA.regulation of transcription.C2H2 zinc finger family				15.9884	0	28	15.9798	14	29	0	10	0	12	0	6	11	0	0	0	15.7089	0.401583	0	0.605212	0.562524	0.492841	0.7751	0	0.278144	0	0.339503	0	0.174671	0.427789	0	0	0	0.464284	0.335598	0.610155	0.0927147	0.171391	0.142596	0.232142	0.307954
AT1G03840.2	MGP is a nuclear-localized putative transcription factor with three zinc finger domains. MGP can interact with three proteins implicated in root patterning: SCR, SHR, and JKD in Y2H assays, and these interactions depend on the first zinc finger in MGP. MGP appears to be a direct transcriptional target of SHR and SCR, based on promoter binding assays, though it is not expressed in the QC, based on…	Magpie (MGP); CONTAINS InterPro DOMAIN/s: Zinc finger, C2H2-like (InterPro:IPR015880), Zinc finger, C2H2-type (InterPro:IPR007087); BEST Arabidopsis thaliana protein match is: C2H2-like zinc finger protein (TAIR:AT5G44160.1); Has 35333 Blast hits to 34131 proteins in 2444 species: Archae - 798; Bacteria - 22429; Metazoa - 974; Fungi - 991; Plants - 531; Viruses - 0; Other Eukaryotes - 9610 (sourc…	MGP	C2H2 and C2HC zinc fingers superfamily protein	RNA.regulation of transcription.C2H2 zinc finger family				2.01162	6	0	2.02017	0	0	10	0	1	0	8	0	0	7	5	2	0.291058	0.0538971	0.169624	0	0.0758613	0	0	0.317319	0	0.0358859	0	0.281173	0	0	0.254203	0.177679	0.0555756	0.0091796	0.074507	0.0252871	0.117735	0.0937243	0.143961	0.0323776	0.0866698
AT1G03850.1	Encodes glutaredoxin ATGRXS13, required to facilitate Botrytis cinerea infection of Arabidopsis thaliana plants. Sylvain La Camera et al (2011, PMID:21756272) reported a third splice variant in addition to the two annotated in TAIR10.	Glutaredoxin family protein; FUNCTIONS IN: electron carrier activity, protein disulfide oxidoreductase activity; INVOLVED IN: response to cytokinin stimulus; EXPRESSED IN: 14 plant structures; EXPRESSED DURING: 9 growth stages; CONTAINS InterPro DOMAIN/s: Glutaredoxin-like, plant II (InterPro:IPR011905), Thioredoxin fold (InterPro:IPR012335), Glutaredoxin (InterPro:IPR002109), Thioredoxin-like fo…	GRXS13	Glutaredoxin family protein	redox.glutaredoxins				3.15375	19.0885	4.2559	5.65345	2.30235	0	9.67819	9.64042	5.8547	8.15378	11.1232	5.87459	6.00678	7.87092	6.71106	12.7446	0	0.165208	1.05715	0.19182	0.415317	0.169615	0	0.599969	0.561151	0.411849	0.487506	0.76825	0.357584	0.489826	0.559417	0.467202	0.692916	0	0.471393	0.194977	0.524323	0.53778	0.505482	0.346458	0.507455
AT1G03850.2	Encodes glutaredoxin ATGRXS13, required to facilitate Botrytis cinerea infection of Arabidopsis thaliana plants. Sylvain La Camera et al (2011, PMID:21756272) reported a third splice variant in addition to the two annotated in TAIR10.	Glutaredoxin family protein; FUNCTIONS IN: electron carrier activity, protein disulfide oxidoreductase activity; INVOLVED IN: response to cytokinin stimulus; EXPRESSED IN: 14 plant structures; EXPRESSED DURING: 9 growth stages; CONTAINS InterPro DOMAIN/s: Glutaredoxin-like, plant II (InterPro:IPR011905), Thioredoxin fold (InterPro:IPR012335), Glutaredoxin (InterPro:IPR002109), Thioredoxin-like fo…	GRXS13	Glutaredoxin family protein	redox.glutaredoxins				31.8463	110.911	1.7441	9.34655	16.6976	10	66.3218	99.3596	51.1453	160.846	84.8768	48.1254	21.9932	97.1291	55.2889	63.2554	28	2.41225	8.89768	0.11365	0.99336	1.78394	0.81123	5.94068	8.38743	5.2147	14.0657	8.51623	4.24503	2.60541	9.99038	5.57574	4.97623	2.52387	3.80786	1.19618	6.51427	8.94232	6.05718	3.75005	4.55528
AT1G03860.1	prohibitin 2	prohibitin 2 (PHB2); INVOLVED IN: biological_process unknown; LOCATED IN: in 8 components; EXPRESSED IN: 30 plant structures; EXPRESSED DURING: 14 growth stages; CONTAINS InterPro DOMAIN/s: Prohibitin (InterPro:IPR000163), Band 7 protein (InterPro:IPR001107); BEST Arabidopsis thaliana protein match is: prohibitin 7 (TAIR:AT5G44140.1); Has 3974 Blast hits to 3972 proteins in 1182 species: Archae -…	PHB2	prohibitin 2	cell.cycle				1579.87	1745.1	1860.41	1513.4	1610.26	1710.98	1344.67	1489.83	1238.04	1819.69	1555.07	1712.07	694.915	1181.75	1526.8	2066.82	1594	53.9521	62.9166	54.6696	72.448	77.1578	62.2465	54.3726	56.4041	56.6695	70.3014	69.7646	67.8217	36.8103	54.7147	69.1933	73.2176	64.181	57.1794	70.6174	55.8154	69.2959	53.5728	68.6993	4.98147
AT1G03860.2	prohibitin 2	prohibitin 2 (PHB2); INVOLVED IN: biological_process unknown; LOCATED IN: in 7 components; EXPRESSED IN: 30 plant structures; EXPRESSED DURING: 14 growth stages; CONTAINS InterPro DOMAIN/s: Prohibitin (InterPro:IPR000163), Band 7 protein (InterPro:IPR001107); BEST Arabidopsis thaliana protein match is: prohibitin 1 (TAIR:AT4G28510.1); Has 35333 Blast hits to 34131 proteins in 2444 species: Archae…	PHB2	prohibitin 2	cell.cycle				0	33.985	16.8059	10.5971	15.738	5.29767	22.7006	6.17429	23.2732	19.4977	21.314	34.6424	23.185	22.2471	6.19918	21.8567	10.4	0	1.14876	0.463099	0.475672	0.706946	0.180679	0.860791	0.219136	0.998724	0.705622	0.896257	1.28658	1.15114	0.965788	0.263398	0.726003	0.392476	0.537286	0.454432	0.692884	0.96282	0.793442	0.55924	0.577962
AT1G03860.3	prohibitin 2	prohibitin 2 (PHB2); INVOLVED IN: biological_process unknown; LOCATED IN: in 7 components; EXPRESSED IN: 30 plant structures; EXPRESSED DURING: 14 growth stages; CONTAINS InterPro DOMAIN/s: Prohibitin (InterPro:IPR000163), Band 7 protein (InterPro:IPR001107); BEST Arabidopsis thaliana protein match is: prohibitin 7 (TAIR:AT5G44140.1); Has 35333 Blast hits to 34131 proteins in 2444 species: Archae…	PHB2	prohibitin 2	cell.cycle				6.12656	5.91551	23.7884	0	0	5.72589	5.62743	0	5.68735	27.8081	5.61282	18.2917	5.90025	0	0	18.3191	5.59895	0.194251	0.197978	0.649038	0	0	0.193348	0.211284	0	0.241645	0.996289	0.233677	0.67261	0.290039	0	0	0.602487	0.209195	0.347089	0.0644493	0.150976	0.634192	0.0966797	0.405841	0.261502
AT1G03870.1	fasciclin-like arabinogalactan-protein 9 (Fla9)	FASCICLIN-like arabinoogalactan 9 (FLA9); LOCATED IN: anchored to plasma membrane, plasma membrane, anchored to membrane; EXPRESSED IN: 23 plant structures; EXPRESSED DURING: 14 growth stages; CONTAINS InterPro DOMAIN/s: FAS1 domain (InterPro:IPR000782); BEST Arabidopsis thaliana protein match is: FASCICLIN-like arabinogalactan protein 13 precursor (TAIR:AT5G44130.1); Has 1005 Blast hits to 985 p…	FLA9	FASCICLIN-like arabinoogalactan 9	cell wall.cell wall proteins.AGPs.AGP				5579	4164	6220	3621	4216	2922	2562	4232	4345	5172	3723	2778	3922	3448	3666	8112	4321	243.324	191.872	233.423	221.429	258.309	135.93	132.269	204.869	254.251	256.363	213.715	140.671	265.835	203.963	212.342	367.112	222.666	222.873	205.223	197.13	203.583	227.38	294.889	27.3003
AT1G03880.1	Protein is tyrosine-phosphorylated and its phosphorylation state is modulated in response to ABA in Arabidopsis thaliana seeds.	cruciferin 2 (CRU2); FUNCTIONS IN: nutrient reservoir activity; INVOLVED IN: seed germination, response to abscisic acid stimulus; LOCATED IN: endomembrane system; EXPRESSED IN: leaf, seed; EXPRESSED DURING: seedling growth, seed development stages; CONTAINS InterPro DOMAIN/s: 11-S seed storage protein, conserved site (InterPro:IPR022379), Cupin, RmlC-type (InterPro:IPR011051), Cupin 1 (InterPro:…	CRU2	cruciferin 2	development.storage proteins				1	0	0	0	0	0	0	0	0	0	0	0	0	0	0	0	0	0.0260154	0	0	0	0	0	0	0	0	0	0	0	0	0	0	0	0	0.0086718	0	0	0	0	0	0.01502
AT1G03890.1		RmlC-like cupins superfamily protein; FUNCTIONS IN: nutrient reservoir activity; INVOLVED IN: biological_process unknown; LOCATED IN: endomembrane system; EXPRESSED IN: leaf, seed; EXPRESSED DURING: seed development stages; CONTAINS InterPro DOMAIN/s: Cupin, RmlC-type (InterPro:IPR011051), Cupin 1 (InterPro:IPR006045), RmlC-like jelly roll fold (InterPro:IPR014710), 11-S seed storage protein, pla…	AT1G03890	RmlC-like cupins superfamily protein	development.storage proteins				0	0	0	0	0	0	0	0	0	0	0	0	0	1	0	0	0	0	0	0	0	0	0	0	0	0	0	0	0	0	0.0381737	0	0	0	0	0	0	0	0.0127246	0	0
AT1G03900.1	member of NAP family, an heterogeneous subfamily of the ATP-binding Cassette (ABC) superfamily of membrane transporters. The NAPs proteins are characterized by having only one nucleotide-binding folds (NBFs) domain.	non-intrinsic ABC protein 4 (NAP4); FUNCTIONS IN: ATPase activity, coupled to transmembrane movement of substances, transporter activity; INVOLVED IN: extracellular transport; LOCATED IN: membrane; EXPRESSED IN: 26 plant structures; EXPRESSED DURING: 15 growth stages; CONTAINS InterPro DOMAIN/s: Adaptin ear-binding coat-associated protein 1 NECAP-1 (InterPro:IPR012466); BEST Arabidopsis thaliana …	ABCI18	non-intrinsic ABC protein 4	not assigned.unknown				1839	2190	2026	1789	1852	2317	1599	1733	1455	2770	2212	2468	1158	1593	1560	2489	1973	67.7197	85.1579	64.1974	92.354	95.7231	90.9268	69.7146	70.7728	71.8361	115.546	107.065	105.451	66.18	79.5402	76.2507	95.0862	85.7135	72.3583	93.0013	70.7745	109.354	73.9903	90.3999	11.2238
AT1G03905.1		P-loop containing nucleoside triphosphate hydrolases superfamily protein; FUNCTIONS IN: nucleoside-triphosphatase activity, ATPase activity, nucleotide binding, ATP binding; EXPRESSED IN: 8 plant structures; EXPRESSED DURING: petal differentiation and expansion stage, D bilateral stage; CONTAINS InterPro DOMAIN/s: ATPase, AAA+ type, core (InterPro:IPR003593), ABC transporter-like (InterPro:IPR003…	ABCI19	P-loop containing nucleoside triphosphate hydrolases superfamily protein	transport.ABC transporters and multidrug resistance systems				98	141	91	131	110	201	129	121	115	275	212	248	78	123	92	232	163	3.81655	5.79938	3.04947	7.15235	6.01444	8.3443	5.94768	5.22733	6.00596	12.1441	10.8566	11.2086	4.71638	6.49568	4.75653	9.37385	7.49247	4.2218	7.17036	5.72699	11.4031	5.32286	8.43316	1.41904
AT1G03910.1	Encodes the Arabidopsis homolog of a conserved eukaryotic protein without known functional domains. The protein that localizes to nuclear speckles and colocalizes with known splicing proteins.	EXPRESSED IN: 25 plant structures; EXPRESSED DURING: 13 growth stages; CONTAINS InterPro DOMAIN/s: Cactin protein, cactus-binding domain, C-terminal (InterPro:IPR019134), Cactin, central region (InterPro:IPR018816); BEST Arabidopsis thaliana protein match is: unknown protein (TAIR:AT2G36815.2); Has 11711 Blast hits to 7382 proteins in 452 species: Archae - 31; Bacteria - 352; Metazoa - 6006; Fung…	AT1G03910	cactus-binding carboxy-terminal, cactin	not assigned.no ontology				702.165	570.577	756.631	640.714	566.003	893.328	458.314	368.52	377.994	870.609	625.418	632.922	376.431	405.153	419.783	650.408	632.723	13.6934	11.7344	12.6985	17.5098	15.4595	18.5252	10.588	7.95292	9.86605	19.0729	15.9765	14.2987	11.3537	10.706	10.8518	13.1524	14.5015	12.7088	17.1648	9.46899	16.4494	10.9705	13.827	0.97954
AT1G03910.2	Encodes the Arabidopsis homolog of a conserved eukaryotic protein without known functional domains. The protein that localizes to nuclear speckles and colocalizes with known splicing proteins.	EXPRESSED IN: 24 plant structures; EXPRESSED DURING: 13 growth stages; CONTAINS InterPro DOMAIN/s: Cactin protein, cactus-binding domain, C-terminal (InterPro:IPR019134), Cactin, central region (InterPro:IPR018816); BEST Arabidopsis thaliana protein match is: unknown protein (TAIR:AT2G36815.2).	AT1G03910	cactus-binding carboxy-terminal, cactin	not assigned.no ontology				539.835	579.423	629.369	434.286	428.997	673.672	317.686	445.48	397.006	551.391	523.582	615.078	310.569	456.847	463.217	716.592	546.277	8.9906	10.1743	9.02061	10.1349	10.003	11.9262	6.26817	8.20722	8.84679	10.3019	11.4158	11.8636	7.99498	10.3083	10.224	12.374	10.6855	9.39517	10.688	7.77406	11.1938	9.50909	11.5297	0.674913
AT1G03920.1		Protein kinase family protein; FUNCTIONS IN: kinase activity; INVOLVED IN: protein amino acid phosphorylation; LOCATED IN: cytosol, plasma membrane; EXPRESSED IN: 23 plant structures; EXPRESSED DURING: 11 growth stages; CONTAINS InterPro DOMAIN/s: Protein kinase, ATP binding site (InterPro:IPR017441), Serine/threonine-protein kinase domain (InterPro:IPR002290), Serine/threonine-protein kinase-lik…	AT1G03920	Protein kinase family protein	protein.postranslational modification				44	19	53	28	28	49	22	18	13	36	24	18	27	20	17	23	23	0.915002	0.416717	0.948497	0.815987	0.815644	1.08372	0.54194	0.414291	0.361872	0.841516	0.653929	0.433677	0.868608	0.563585	0.468667	0.495974	0.562275	0.760072	0.905117	0.439368	0.643041	0.63362	0.529124	0.297825
AT1G03930.1	Phosphorylates serine, threonine, and tyrosine	dual specificity kinase 1 (ADK1); CONTAINS InterPro DOMAIN/s: Protein kinase, ATP binding site (InterPro:IPR017441), Protein kinase, catalytic domain (InterPro:IPR000719), Serine/threonine-protein kinase-like domain (InterPro:IPR017442), Protein kinase-like domain (InterPro:IPR011009), Serine/threonine-protein kinase, active site (InterPro:IPR008271); BEST Arabidopsis thaliana protein match is: c…	ADK1	dual specificity kinase 1	protein.postranslational modification				1998	2284	2675	1499	1602	2078	1432	1570	1759	2144	1828	2008	1315.51	1728	1850	2607	1840	35.2229	42.4561	40.5839	37.0303	39.5453	38.9451	29.9071	30.6212	41.4954	42.4215	42.1973	41.0007	35.8542	41.2743	43.2256	47.6534	38.1063	39.421	38.5069	34.0079	41.8732	40.118	42.8798	3.75421
AT1G03940.1		HXXXD-type acyl-transferase family protein; FUNCTIONS IN: transferase activity, transferring acyl groups other than amino-acyl groups, transferase activity; INVOLVED IN: biological_process unknown; LOCATED IN: cellular_component unknown; CONTAINS InterPro DOMAIN/s: Transferase (InterPro:IPR003480); BEST Arabidopsis thaliana protein match is: HXXXD-type acyl-transferase family protein (TAIR:AT1G03…	AT1G03940	HXXXD-type acyl-transferase family protein	secondary metabolism.flavonoids.anthocyanins.anthocyanin 5-aromatic acyltransferase				581.759	341.652	379.332	542.584	225.942	955.062	173.09	138.264	76.3931	254.46	269.826	384.7	64.4774	159.409	208.198	148.057	394.453	16.444	10.191	9.22686	21.4962	8.9545	28.7381	5.79423	4.32957	2.89261	8.11397	10.0078	12.607	2.82366	6.10756	7.80621	4.34059	13.1289	11.954	19.7296	4.3388	10.2429	5.57914	8.73475	3.91826
AT1G03950.1		vacuolar protein sorting-associated protein 2.3 (VPS2.3); CONTAINS InterPro DOMAIN/s: Snf7 (InterPro:IPR005024); BEST Arabidopsis thaliana protein match is: SNF7 family protein (TAIR:AT5G44560.1); Has 1693 Blast hits to 1691 proteins in 237 species: Archae - 2; Bacteria - 12; Metazoa - 754; Fungi - 334; Plants - 366; Viruses - 0; Other Eukaryotes - 225 (source: NCBI BLink).	VPS2.3	vacuolar protein sorting-associated protein 2.3	RNA.regulation of transcription.SNF7				469	430	484	396	345	522	327	380	303	605	503	541	281	341	334	502	468	21.2483	20.5848	18.8676	25.1559	21.9621	25.2302	17.5358	19.1131	18.421	31.1767	30.004	28.4617	19.7916	20.9551	20.0988	23.6003	25.0612	20.2336	24.1161	18.3566	29.8808	20.2818	24.3307	1.2286
AT1G03960.1		Calcium-binding EF hand family protein; FUNCTIONS IN: calcium ion binding; INVOLVED IN: biological_process unknown; LOCATED IN: cellular_component unknown; EXPRESSED IN: 22 plant structures; EXPRESSED DURING: 14 growth stages; CONTAINS InterPro DOMAIN/s: EF-Hand 1, calcium-binding site (InterPro:IPR018247), EF-HAND 2 (InterPro:IPR018249), EF-hand-like domain (InterPro:IPR011992); BEST Arabidopsis…	AT1G03960	Calcium-binding EF hand family protein	protein.postranslational modification				114.195	82.4733	156.093	120.895	119.121	158.247	128.983	150.243	74.5793	171.126	127.242	154.448	83.4695	97.3938	127.472	174.519	192.343	2.01962	1.53798	2.37577	2.9961	2.94995	2.97535	2.70245	2.93976	1.76501	3.39689	2.94671	3.16377	2.28229	2.33378	2.98798	3.20028	3.99625	1.97779	2.9738	2.46907	3.16912	2.53468	3.59827	0.420458
AT1G03960.2		Calcium-binding EF hand family protein; FUNCTIONS IN: calcium ion binding; INVOLVED IN: biological_process unknown; LOCATED IN: cellular_component unknown; EXPRESSED IN: 22 plant structures; EXPRESSED DURING: 14 growth stages; CONTAINS InterPro DOMAIN/s: EF-Hand 1, calcium-binding site (InterPro:IPR018247), EF-HAND 2 (InterPro:IPR018249), EF-hand-like domain (InterPro:IPR011992); BEST Arabidopsis…	AT1G03960	Calcium-binding EF hand family protein	protein.postranslational modification				116.805	131.527	76.9074	74.105	85.8792	95.7532	69.0167	34.7572	78.4207	115.874	146.758	166.552	63.5305	77.6062	68.5281	76.4813	88.6571	1.93113	2.29267	1.09426	1.71677	1.98784	1.68275	1.35183	0.635664	1.73475	2.14902	3.1764	3.18899	1.6235	1.73833	1.50149	1.31104	1.7215	1.77269	1.79579	1.24075	2.83814	1.62111	1.51627	0.614715
AT1G03970.1	encodes a basic leucine zipper G-box binding factor that can bind to G-box motifs only as heterodimers with GBF2 or GBF3. A single amino acid change can confer G-box binding as homodimers.	G-box binding factor 4 (GBF4); FUNCTIONS IN: sequence-specific DNA binding, DNA binding, sequence-specific DNA binding transcription factor activity; INVOLVED IN: regulation of transcription, DNA-dependent; LOCATED IN: nucleus; EXPRESSED IN: 22 plant structures; EXPRESSED DURING: 13 growth stages; CONTAINS InterPro DOMAIN/s: Basic-leucine zipper (bZIP) transcription factor (InterPro:IPR004827), b…	GBF4	G-box binding factor 4	RNA.regulation of transcription.bZIP transcription factor family				445.688	537.247	546.839	374.966	327.805	519.767	388.171	431.529	340.513	659.746	531.172	564.294	269.019	368.711	364.057	576.082	486.923	17.2352	21.9416	18.1963	20.3286	17.7968	21.4253	17.7715	18.511	17.6582	28.9261	27.009	25.3242	16.1515	19.3349	18.6897	23.1127	22.2234	19.1244	19.8502	17.9802	27.0864	18.0587	22.6681	2.48667
AT1G03980.1	Encodes a protein with phytochelatin synthase activity which binds Cd2+ and Cd-glutathione complexes with high affinity. The protein has been postulated to be involved in Cd2+ tolerance. AtPCS2 expression appears to be less than that of AtPCS1, explaining the inability of endogenous AtPCS2 to substitute for AtPCS1 in the cad1-3 mutant (AtPCS1 null).	phytochelatin synthase 2 (PCS2); CONTAINS InterPro DOMAIN/s: Phytochelatin synthase, C-terminal (InterPro:IPR015407), Phytochelatin synthase (InterPro:IPR007719); BEST Arabidopsis thaliana protein match is: phytochelatin synthase 1 (PCS1) (TAIR:AT5G44070.1); Has 342 Blast hits to 342 proteins in 145 species: Archae - 0; Bacteria - 138; Metazoa - 36; Fungi - 7; Plants - 117; Viruses - 0; Other Euk…	PCS2	phytochelatin synthase 2	metal handling.binding, chelation and storage				25.3121	6.75279	9.16147	5.03412	5.19537	5.2408	21.8295	14.4707	6.48707	15.2544	8.82805	10.7055	3.98149	17.2887	12.9959	15.918	18.0773	0.446434	0.125582	0.139057	0.124416	0.128306	0.0982661	0.456115	0.282365	0.153102	0.301965	0.203879	0.218693	0.108565	0.41314	0.303792	0.291099	0.374552	0.237024	0.116996	0.297194	0.241512	0.275166	0.332825	0.181479
AT1G03982.1		PAK-box/P21-Rho-binding family protein; CONTAINS InterPro DOMAIN/s: PAK-box/P21-Rho-binding (InterPro:IPR000095); BEST Arabidopsis thaliana protein match is: PAK-box/P21-Rho-binding family protein (TAIR:AT4G28556.1); Has 35333 Blast hits to 34131 proteins in 2444 species: Archae - 798; Bacteria - 22429; Metazoa - 974; Fungi - 991; Plants - 531; Viruses - 0; Other Eukaryotes - 9610 (source: NCBI B…	AT1G03982	PAK-box/P21-Rho-binding family protein	stress.abiotic.drought/salt				0	0	0	0	0	0	0	0	0	0	0	0	0	0	0	0	0	0	0	0	0	0	0	0	0	0	0	0	0	0	0	0	0	0	0	0	0	0	0	0	0
AT1G03990.1		Long-chain fatty alcohol dehydrogenase family protein; FUNCTIONS IN: oxidoreductase activity, oxidoreductase activity, acting on CH-OH group of donors, FAD binding; CONTAINS InterPro DOMAIN/s: Glucose-methanol-choline oxidoreductase, N-terminal (InterPro:IPR000172), Glucose-methanol-choline oxidoreductase, C-terminal (InterPro:IPR007867), Long-chain fatty alcohol dehydrogenase (InterPro:IPR012400…	AT1G03990	Long-chain fatty alcohol dehydrogenase family protein	not assigned.no ontology				128	127	109	59	57	107	64	77	103	105	100	104	96	95	54	116	79	2.32127	2.42857	1.70114	1.49933	1.4475	2.06303	1.37496	1.54499	2.49965	2.13767	2.37486	2.18457	2.69182	2.33428	1.29797	2.18124	1.68321	2.15033	1.66995	1.80653	2.23237	2.10802	1.93223	0.392689
AT1G04000.1		unknown protein; BEST Arabidopsis thaliana protein match is: unknown protein (TAIR:AT5G44060.1); Has 62 Blast hits to 62 proteins in 10 species: Archae - 0; Bacteria - 0; Metazoa - 0; Fungi - 0; Plants - 62; Viruses - 0; Other Eukaryotes - 0 (source: NCBI BLink).	AT1G04000	hypothetical protein	not assigned.unknown				403	416	472	184	183	240	274	357	308	265	195	276	250	303	291	257	243	18.0042	19.6368	18.144	11.5259	11.4866	11.4379	14.4896	17.7051	18.4634	13.4619	11.4686	14.3174	17.3612	18.3606	17.2669	11.914	12.8298	18.595	11.4835	16.886	13.0826	17.6629	12.3719	0.904929
AT1G04010.1		phospholipid sterol acyl transferase 1 (PSAT1); CONTAINS InterPro DOMAIN/s: Lecithin:cholesterol acyltransferase (InterPro:IPR003386); BEST Arabidopsis thaliana protein match is: phospholipid:diacylglycerol acyltransferase (TAIR:AT5G13640.1); Has 615 Blast hits to 606 proteins in 192 species: Archae - 0; Bacteria - 2; Metazoa - 241; Fungi - 118; Plants - 150; Viruses - 0; Other Eukaryotes - 104 (…	PSAT1	phospholipid sterol acyl transferase 1	lipid metabolism.'exotics' (steroids, squalene etc).phosphatidylcholinesterol O-acyltransferase				310	319	355	328	303	477	226	146	143	323	344	381	156	181	170	402	374	5.31673	5.76861	5.23977	7.88273	7.27614	8.69665	4.59197	2.77014	3.28172	6.21609	7.72464	7.56808	4.13601	4.2059	3.86416	7.14868	7.53454	5.4417	7.95184	3.54794	7.1696	4.06869	7.34161	0.285713
AT1G04020.1	Encodes a protein containing two tandem BRCA1 C-Terminal (BRCT) domains, which function in phosphorylation-dependent protein‚Äìprotein interactions.Loss of function mutations cause defects in meristem organization due to failure to repress WUS. BARD1 binds to WUS promoter and over expression of BARD reduces the extent of WUS expression.	breast cancer associated RING 1 (BARD1); FUNCTIONS IN: transcription coactivator activity, DNA binding; INVOLVED IN: DNA repair, regulation of meristem structural organization, leaf development; LOCATED IN: intracellular; EXPRESSED IN: 21 plant structures; EXPRESSED DURING: 12 growth stages; CONTAINS InterPro DOMAIN/s: Zinc finger, RING-type, conserved site (InterPro:IPR017907), Zinc finger, RING…	BARD1	breast cancer associated RING 1	RNA.regulation of transcription.putative transcription regulator				284.123	229.958	341.196	163.982	170.22	168.051	159.242	169.193	204.477	228.711	158.806	201.269	56.3978	154.643	188.483	161.164	158.213	4.87726	4.16213	5.0405	3.94444	4.09126	3.06663	3.23843	3.21305	4.69674	4.40546	3.56923	4.00152	1.49661	3.59663	4.28811	2.8685	3.19019	4.6933	3.70078	3.71607	3.99207	3.12712	3.02935	0.467189
AT1G04020.2	Encodes a protein containing two tandem BRCA1 C-Terminal (BRCT) domains, which function in phosphorylation-dependent protein‚Äìprotein interactions.Loss of function mutations cause defects in meristem organization due to failure to repress WUS. BARD1 binds to WUS promoter and over expression of BARD reduces the extent of WUS expression.	breast cancer associated RING 1 (BARD1); FUNCTIONS IN: transcription coactivator activity, DNA binding; INVOLVED IN: DNA repair, regulation of meristem structural organization, leaf development; LOCATED IN: intracellular; EXPRESSED IN: 21 plant structures; EXPRESSED DURING: 12 growth stages; CONTAINS InterPro DOMAIN/s: Zinc finger, RING-type, conserved site (InterPro:IPR017907), Zinc finger, RING…	BARD1	breast cancer associated RING 1	RNA.regulation of transcription.putative transcription regulator				171.877	172.042	195.804	83.0182	107.78	169.949	177.758	110.807	98.5232	143.289	104.194	79.7309	142.602	134.357	112.517	143.836	111.787	2.95438	3.11805	2.8965	1.9996	2.59397	3.10544	3.61982	2.10711	2.26607	2.76378	2.34495	1.58729	3.78925	3.12902	2.56325	2.56351	2.25707	2.98964	2.56634	2.66433	2.23201	3.16051	2.41029	0.114907
AT1G04030.1		unknown protein; BEST Arabidopsis thaliana protein match is: unknown protein (TAIR:AT5G44040.1); Has 1835 Blast hits to 1511 proteins in 238 species: Archae - 7; Bacteria - 164; Metazoa - 377; Fungi - 135; Plants - 187; Viruses - 22; Other Eukaryotes - 943 (source: NCBI BLink).	AT1G04030	eisosome protein	not assigned.unknown				111.267	72.0029	122.551	87.999	92.9942	87.3327	90.8178	67.8247	58.6282	137.857	105.356	109.752	62.8724	70.9443	45.6744	118.533	110.457	2.5309	1.7276	2.39891	2.80519	2.96377	2.11322	2.44688	1.70792	1.78544	3.52805	3.14115	2.89284	2.21325	2.18686	1.37751	2.79598	2.95488	2.21914	2.62739	1.98008	3.18735	1.92587	2.87543	0.430769
AT1G04040.1		HAD superfamily, subfamily IIIB acid phosphatase ; FUNCTIONS IN: acid phosphatase activity; INVOLVED IN: biological_process unknown; LOCATED IN: cell wall, plasma membrane, vacuole, plant-type cell wall; EXPRESSED IN: 19 plant structures; EXPRESSED DURING: 9 growth stages; CONTAINS InterPro DOMAIN/s: Acid phosphatase (Class B) (InterPro:IPR005519), Vegetative storage protein/acid phosphatase (Int…	AT1G04040	HAD superfamily, subfamily IIIB acid phosphatase	misc.acid and other phosphatases				4477.73	4590	5162.45	4169	4569.01	3540.67	3000.18	3495.18	3426.37	3871.14	3856.64	2700.25	3597.13	3395.06	3941.33	7920.47	5099.54	189.297	204.987	187.789	247.106	271.297	159.626	150.142	163.978	194.315	185.871	214.533	132.519	236.266	194.654	221.257	347.426	254.642	194.024	226.01	169.478	177.641	217.392	301.034	9.52384
AT1G04050.1	Encodes SUVR1, one of the four closely related Arabidopsis SUVR proteins that belong to the SU(VAR)3-9 subgroup of SET-domain proteins. Proteins containing the evolutionarily conserved SET domain are involved in regulation of eukaryotic gene expression and chromatin structure through their histone lysine methyltransferase (HMTase) activity. SUVR1, SUVR2 and SUVR4 proteins contain a novel domain a…	homolog of SU(var)3-9 1 (SUVR1); FUNCTIONS IN: zinc ion binding, histone-lysine N-methyltransferase activity; INVOLVED IN: chromatin modification; LOCATED IN: nucleolus; EXPRESSED IN: 21 plant structures; EXPRESSED DURING: 14 growth stages; CONTAINS InterPro DOMAIN/s: SET domain (InterPro:IPR001214), WIYLD domain (InterPro:IPR018848), Pre-SET zinc-binding sub-group (InterPro:IPR003606), Pre-SET d…	SUVR1	histone-lysine N-methyltransferase SUVR2-like protein	RNA.regulation of transcription.SET-domain transcriptional regulator family				196	97	129	123	154	136	143	65	54	100	85	132	72	68	90	192	138	2.99396	1.56206	1.69584	2.63267	3.29295	2.20789	2.58797	1.09816	1.10353	1.7125	1.69936	2.33489	1.69955	1.40722	1.82177	3.04078	2.47509	2.08395	2.71117	1.59655	1.91558	1.64285	2.75793	0.790922
AT1G04070.1	Subunit of the TOM complex, a translocase in the outer mitochondrial membrane that selectively allows proteins with a mitochondrial targeting sequence to enter the mitochondrion.	translocase of outer membrane 22-I (TOM22-I); FUNCTIONS IN: P-P-bond-hydrolysis-driven protein transmembrane transporter activity; INVOLVED IN: protein targeting to mitochondrion; LOCATED IN: mitochondrial outer membrane translocase complex; EXPRESSED IN: 22 plant structures; EXPRESSED DURING: 13 growth stages; CONTAINS InterPro DOMAIN/s: Mitochondrial outer membrane translocase complex, subunit …	TOM22-I	translocase of outer membrane 22-I	protein.targeting.mitochondria				103	115	103	80	77	91	102	95	87	123	88	93	60	68	84	113	78	8.22191	9.72533	7.07284	8.96099	8.67379	7.78362	9.62711	8.45545	9.35081	11.3579	9.3125	8.64819	7.49658	7.37118	8.93001	9.3692	7.41601	8.34003	8.4728	9.14446	9.77286	7.93259	8.3926	1.33018
AT1G04080.1		PRP39; FUNCTIONS IN: binding; INVOLVED IN: regulation of timing of transition from vegetative to reproductive phase; LOCATED IN: intracellular, nucleus; EXPRESSED IN: 28 plant structures; EXPRESSED DURING: 13 growth stages; CONTAINS InterPro DOMAIN/s: RNA-processing protein, HAT helix (InterPro:IPR003107), Tetratricopeptide-like helical (InterPro:IPR011990), Suppressor of forked (InterPro:IPR0088…	PRP39	Tetratricopeptide repeat (TPR)-like superfamily protein	not assigned.no ontology.hydroxyproline rich proteins				1632.12	1424.08	1485.04	1371.87	1301.69	1757.45	1187.74	704.595	788.599	1727.99	1425.42	1247.22	795.007	1053.91	944.923	1448.98	1513.71	24.7741	22.7883	19.3995	29.1783	27.658	28.3511	21.3599	11.8289	16.0139	29.4041	28.3176	21.9223	18.6474	21.6727	19.0064	22.8034	26.9775	22.3206	28.3958	16.4009	26.548	19.7755	24.8905	2.71765
AT1G04080.2		PRP39; FUNCTIONS IN: binding; INVOLVED IN: regulation of timing of transition from vegetative to reproductive phase; LOCATED IN: intracellular; EXPRESSED IN: 28 plant structures; EXPRESSED DURING: 13 growth stages; CONTAINS InterPro DOMAIN/s: RNA-processing protein, HAT helix (InterPro:IPR003107), Tetratricopeptide-like helical (InterPro:IPR011990); BEST Arabidopsis thaliana protein match is: Tet…	PRP39	Tetratricopeptide repeat (TPR)-like superfamily protein	not assigned.no ontology.hydroxyproline rich proteins				471.729	621.909	557.401	396.537	344.994	404.968	245.057	585.385	424.505	424.843	444.011	743.549	241.098	310.678	547.466	703.201	498.377	9.86303	13.7141	10.0294	11.6187	10.1044	9.00526	6.06935	13.5466	11.8809	9.98528	12.1639	18.0118	7.79851	8.8022	15.1749	15.2462	12.2501	11.2022	10.2428	10.499	13.387	10.5919	13.7482	2.17698
AT1G04080.3		PRP39; INVOLVED IN: regulation of timing of transition from vegetative to reproductive phase; LOCATED IN: intracellular; EXPRESSED IN: 28 plant structures; EXPRESSED DURING: 13 growth stages; CONTAINS InterPro DOMAIN/s: RNA-processing protein, HAT helix (InterPro:IPR003107); BEST Arabidopsis thaliana protein match is: Tetratricopeptide repeat (TPR)-like superfamily protein (TAIR:AT5G46400.1).	PRP39	Tetratricopeptide repeat (TPR)-like superfamily protein	not assigned.no ontology.hydroxyproline rich proteins				430.151	518.011	612.557	312.588	331.32	470.587	379.207	337.02	358.896	599.172	304.567	483.232	294.895	328.41	440.611	409.821	360.913	5.89772	7.48663	7.22804	6.00514	6.35772	6.85592	6.1602	5.10975	6.58209	9.20307	5.46372	7.67112	6.24607	6.09983	8.00436	5.82548	5.80818	6.8708	6.40626	5.95068	7.44597	6.78342	5.81683	0.85257
AT1G04090.1		Plant protein of unknown function (DUF946); CONTAINS InterPro DOMAIN/s: Protein of unknown function DUF946 (InterPro:IPR009291); BEST Arabidopsis thaliana protein match is: Plant protein of unknown function (DUF946) (TAIR:AT5G43950.1); Has 349 Blast hits to 319 proteins in 89 species: Archae - 0; Bacteria - 23; Metazoa - 11; Fungi - 104; Plants - 206; Viruses - 0; Other Eukaryotes - 5 (source: NC…	AT1G04090	vacuolar sorting-associated protein (DUF946)	not assigned.unknown				22	15	24	16	17	14	9	12	17	18	13	16	16	15	15	25	14	0.467589	0.336253	0.438978	0.476565	0.506161	0.31648	0.226588	0.282301	0.483675	0.43013	0.362055	0.394008	0.526129	0.432018	0.422663	0.550997	0.349837	0.414273	0.433069	0.330855	0.395398	0.46027	0.450417	0.0690654
AT1G04100.1	Auxin induced gene, IAA10 (IAA10).	indoleacetic acid-induced protein 10 (IAA10); FUNCTIONS IN: sequence-specific DNA binding transcription factor activity; INVOLVED IN: response to auxin stimulus, response to chitin; LOCATED IN: nucleus; EXPRESSED IN: 7 plant structures; EXPRESSED DURING: 4 anthesis, petal differentiation and expansion stage; CONTAINS InterPro DOMAIN/s: Aux/IAA-ARF-dimerisation (InterPro:IPR011525), AUX/IAA protei…	IAA10	indoleacetic acid-induced protein 10	RNA.regulation of transcription.Aux/IAA family				145	149	151	80	95	129	124	108	95	134	108	121	78	110	102	126	109	5.06842	5.49891	4.54184	3.92002	4.65982	4.80423	5.13208	4.18563	4.45135	5.301	4.96016	4.90665	4.22981	5.21318	4.73181	4.56889	4.49304	5.03639	4.46136	4.58969	5.05594	4.72493	4.53097	0.479338
AT1G04110.1	Initially identified as a mutation affecting stomatal development and distribution. Encodes a protein similar to serine proteases.	STOMATAL DENSITY AND DISTRIBUTION (SDD1); CONTAINS InterPro DOMAIN/s: Protease-associated PA (InterPro:IPR003137), Proteinase inhibitor, propeptide (InterPro:IPR009020), Peptidase S8/S53, subtilisin/kexin/sedolisin (InterPro:IPR000209), Peptidase S8, subtilisin-related (InterPro:IPR015500), Peptidase S8/S53, subtilisin, active site (InterPro:IPR022398), Proteinase inhibitor I9, subtilisin propept…	SDD1	Subtilase family protein	protein.degradation.subtilases				91	84	129	75	94	131	21	11	9	46	48	41	43	47	56	75	100	1.61162	1.56861	1.96612	1.86126	2.33107	2.46646	0.440596	0.215531	0.21329	0.91438	1.11313	0.841018	1.17737	1.12778	1.31447	1.37723	2.08054	1.71545	2.2196	0.289806	0.956176	1.20654	1.72889	0.218149
AT1G04120.1	encodes a high-affinity inositol hexakisphosphate transporter that plays a role in guard cell signaling and phytate storage. It is a member of MRP subfamily / ABC transporter subfamily C.	multidrug resistance-associated protein 5 (MRP5); FUNCTIONS IN: ATPase activity, coupled to transmembrane movement of substances, sulfonylurea receptor activity; INVOLVED IN: response to salt stress, cellular potassium ion homeostasis; LOCATED IN: vacuolar membrane, plasma membrane, plant-type vacuole; EXPRESSED IN: 25 plant structures; EXPRESSED DURING: 14 growth stages; CONTAINS InterPro DOMAIN…	ABCC5	multidrug resistance-associated protein 5	transport.ABC transporters and multidrug resistance systems				2592.83	2167.7	2471.51	1468	1383	2045.61	1985.37	1547.25	1418.87	2351.36	1814.38	2051.25	1483.54	1755.16	1495	1797.7	1989.2	19.5018	17.1782	15.9989	15.4687	14.5471	16.336	17.6962	12.8589	14.266	19.7539	17.8336	17.8529	17.2163	17.8792	14.8916	14.0157	17.5372	17.5596	15.4506	14.9404	18.4801	16.6624	15.7765	1.78233
AT1G04120.2	encodes a high-affinity inositol hexakisphosphate transporter that plays a role in guard cell signaling and phytate storage. It is a member of MRP subfamily / ABC transporter subfamily C.	multidrug resistance-associated protein 5 (MRP5); CONTAINS InterPro DOMAIN/s: ATPase, AAA+ type, core (InterPro:IPR003593), ABC transporter-like (InterPro:IPR003439), ABC transporter integral membrane type 1 (InterPro:IPR017940), ABC transporter, transmembrane domain, type 1 (InterPro:IPR011527), ABC transporter, transmembrane domain (InterPro:IPR001140), ABC transporter, conserved site (InterPro…	ABCC5	multidrug resistance-associated protein 5	transport.ABC transporters and multidrug resistance systems				50.1665	35.3042	34.4893	0	0	25.3939	25.6319	10.7545	11.13	44.6426	57.6194	21.7484	13.4567	24.8383	0	19.3018	21.8016	0.369467	0.273945	0.218613	0	0	0.198566	0.223709	0.0875161	0.109575	0.367209	0.554535	0.185342	0.152906	0.247749	0	0.147352	0.188199	0.287342	0.0661887	0.140267	0.369029	0.133552	0.167775	0.0763141
AT1G04130.1	Encodes one of the 36 carboxylate clamp (CC)-tetratricopeptide repeat (TPR) proteins (Prasad 2010, Pubmed ID: 20856808). Interacts with Hsp90/Hsp70 as co-chaperone.	Tetratricopeptide repeat (TPR)-like superfamily protein; FUNCTIONS IN: binding; INVOLVED IN: biological_process unknown; LOCATED IN: cellular_component unknown; EXPRESSED IN: 22 plant structures; EXPRESSED DURING: 13 growth stages; CONTAINS InterPro DOMAIN/s: Tetratricopeptide-like helical (InterPro:IPR011990), Tetratricopeptide repeat-containing (InterPro:IPR013026), Tetratricopeptide repeat (In…	TPR2	Tetratricopeptide repeat (TPR)-like superfamily protein	protein.postranslational modification				413	314	439	235	228	265	279	252	219	288	207	298	224	288	244	294	249	13.6797	10.9795	12.5126	10.9112	10.5951	9.34978	10.9427	9.25253	9.72198	10.7866	9.00548	11.4489	11.5063	12.9328	10.7245	10.1015	9.72209	12.3906	10.2854	9.9724	10.4137	11.7212	9.91179	1.35423
AT1G04140.1		Transducin family protein / WD-40 repeat family protein; FUNCTIONS IN: nucleotide binding; INVOLVED IN: biological_process unknown; LOCATED IN: chloroplast; EXPRESSED IN: 24 plant structures; EXPRESSED DURING: 15 growth stages; CONTAINS InterPro DOMAIN/s: WD40 repeat 2 (InterPro:IPR019782), WD40 repeat-like-containing domain (InterPro:IPR011046), WD40 repeat, conserved site (InterPro:IPR019775), …	AT1G04140	Transducin family protein / WD-40 repeat family protein	development.unspecified				1837.84	1914.59	1904.33	1725.94	1493.34	2463.06	1365.01	1192.79	1263.96	2144.36	1752.54	2045.68	1041.08	1248.86	1367.73	2107.19	1737.05	23.8417	26.1797	21.2611	31.3715	27.1105	33.949	20.9812	17.1094	21.9312	31.1524	29.7425	30.724	20.8605	21.9467	23.5079	28.34	26.4452	23.7608	30.8103	20.0073	30.5396	22.105	27.3926	2.4603
AT1G04140.2		Transducin family protein / WD-40 repeat family protein; FUNCTIONS IN: nucleotide binding; INVOLVED IN: biological_process unknown; LOCATED IN: chloroplast; EXPRESSED IN: 24 plant structures; EXPRESSED DURING: 15 growth stages; CONTAINS InterPro DOMAIN/s: WD40 repeat 2 (InterPro:IPR019782), WD40 repeat, conserved site (InterPro:IPR019775), WD40 repeat (InterPro:IPR001680), WD40 repeat-like-contai…	AT1G04140	Transducin family protein / WD-40 repeat family protein	development.unspecified				388.162	413.415	455.67	199.06	367.663	415.939	289.988	192.209	209.039	495.644	420.456	457.317	175.924	367.141	229.27	521.807	430.945	5.01021	5.62455	5.06183	3.60003	6.64109	5.70416	4.43496	2.74318	3.60884	7.16414	7.09966	6.8339	3.50731	6.41949	3.92078	6.98262	6.52773	5.2322	5.31509	3.59566	7.03257	4.61586	6.75518	0.340767
AT1G04150.1		C2 calcium/lipid-binding plant phosphoribosyltransferase family protein; CONTAINS InterPro DOMAIN/s: C2 membrane targeting protein (InterPro:IPR018029), C2 calcium/lipid-binding domain, CaLB (InterPro:IPR008973), Phosphoribosyltransferase C-terminal (InterPro:IPR013583), C2 calcium-dependent membrane targeting (InterPro:IPR000008); BEST Arabidopsis thaliana protein match is: C2 calcium/lipid-bind…	AT1G04150	C2 calcium/lipid-binding plant phosphoribosyltransferase family protein	not assigned.no ontology.C2 domain-containing protein				3	0	2	4	0	0	3	0	0	0	0	0	3	0	0	0	2	0.04005	0	0.0229786	0.0748212	0	0	0.0474529	0	0	0	0	0	0.0618653	0	0	0	0.0313365	0.0210095	0.0249404	0.0158176	0	0.0206218	0.0156683	0.0200975
AT1G04160.1	Encodes a member of the type XI myosin protein family involved in root hair elongation.	myosin XI B (XIB); FUNCTIONS IN: motor activity; INVOLVED IN: root hair elongation, actin filament-based movement; LOCATED IN: myosin complex; EXPRESSED IN: 20 plant structures; EXPRESSED DURING: 10 growth stages; CONTAINS InterPro DOMAIN/s: Dil domain (InterPro:IPR018444), Dilute (InterPro:IPR002710), Myosin, N-terminal, SH3-like (InterPro:IPR004009), Myosin head, motor domain (InterPro:IPR00160…	XIB	myosin XI B	cell.organisation				392	320	434	349	326	542	225	144	182	278	258	273	222	205	186	386	397	3.47277	2.9872	3.30906	4.33166	4.03956	5.099	2.36207	1.40984	2.15566	2.75262	2.98769	2.79896	3.03527	2.45979	2.18246	3.5448	4.12373	3.25634	4.49007	1.97586	2.84642	2.55917	3.83426	0.24704
AT1G04170.1	protein synthesis initiation factor eIF2 gamma	eukaryotic translation initiation factor 2 gamma subunit (EIF2 GAMMA); CONTAINS InterPro DOMAIN/s: Translation elongation factor EFTu/EF1A, domain 2 (InterPro:IPR004161), Initiation factor eIF2 gamma, C-terminal (InterPro:IPR015256), Translation elongation factor EF1A/initiation factor IF2gamma, C-terminal (InterPro:IPR009001), Protein synthesis factor, GTP-binding (InterPro:IPR000795), Translati…	EIF2 GAMMA	eukaryotic translation initiation factor 2 gamma subunit	protein.synthesis.initiation				2917	2981	3332	2385	2452	2789	2344	2340	2124	3216	2365	2635	1619	2189	2680	3053	2621	68.4924	73.8372	67.3278	78.4832	80.6762	69.6712	65.1908	60.8319	66.7761	84.9908	72.7978	71.7001	58.8406	69.656	83.4406	74.3409	72.3905	69.8858	76.2769	64.2663	76.4962	70.6457	73.3657	3.4712
AT1G04171.1		unknown protein; Has 30201 Blast hits to 17322 proteins in 780 species: Archae - 12; Bacteria - 1396; Metazoa - 17338; Fungi - 3422; Plants - 5037; Viruses - 0; Other Eukaryotes - 2996 (source: NCBI BLink).			not assigned.unknown				0	0	0	0	0	0	0	0	0	0	0	0	0	0	0	0	0	0	0	0	0	0	0	0	0	0	0	0	0	0	0	0	0	0	0	0	0	0	0	0	0
AT1G04180.1		YUCCA 9 (YUC9); FUNCTIONS IN: NADP or NADPH binding, oxidoreductase activity, monooxygenase activity, FAD binding, flavin-containing monooxygenase activity; INVOLVED IN: oxidation reduction; EXPRESSED IN: root; CONTAINS InterPro DOMAIN/s: Pyridine nucleotide-disulphide oxidoreductase, class-II (InterPro:IPR000103), FAD-dependent pyridine nucleotide-disulphide oxidoreductase (InterPro:IPR013027), …	YUC9	YUCCA 9	misc.oxidases - copper, flavone etc				5	4	3	4	2	3	1	0	2	3	0	4	2	2	2	4	1	0.172892	0.146029	0.0892642	0.19389	0.0970411	0.110519	0.0409428	0	0.0927006	0.117381	0	0.160452	0.107281	0.0937635	0.0917794	0.143482	0.0407735	0.136062	0.133817	0.0445478	0.092611	0.097608	0.0921277	0.0426956
AT1G04190.1	Encodes one of the 36 carboxylate clamp (CC)-tetratricopeptide repeat (TPR) proteins (Prasad 2010, Pubmed ID: 20856808) with potential to interact with Hsp90/Hsp70 as co-chaperones.	Tetratricopeptide repeat (TPR)-like superfamily protein; FUNCTIONS IN: binding; INVOLVED IN: biological_process unknown; LOCATED IN: cellular_component unknown; EXPRESSED IN: 22 plant structures; EXPRESSED DURING: 13 growth stages; CONTAINS InterPro DOMAIN/s: Tetratricopeptide TPR-1 (InterPro:IPR001440), Tetratricopeptide-like helical (InterPro:IPR011990), Tetratricopeptide repeat-containing (Int…	TPR3	Tetratricopeptide repeat (TPR)-like superfamily protein	not assigned.no ontology.tetratricopeptide repeat (TPR)				808	801	822	595	559	728	629	589	603	783	670	738	458	578	665	844	713	26.3334	27.5572	23.0528	27.1821	25.5576	25.2712	24.2742	21.2772	26.3374	28.8476	28.677	27.8966	23.146	25.538	28.7581	28.5328	27.3884	25.6478	26.0036	23.9629	28.4737	25.814	27.9606	2.32915
AT1G04200.1		FUNCTIONS IN: molecular_function unknown; INVOLVED IN: N-terminal protein myristoylation; LOCATED IN: cellular_component unknown; EXPRESSED IN: 22 plant structures; EXPRESSED DURING: 13 growth stages; CONTAINS InterPro DOMAIN/s: Dymeclin (InterPro:IPR019142); Has 395 Blast hits to 389 proteins in 117 species: Archae - 0; Bacteria - 0; Metazoa - 262; Fungi - 21; Plants - 68; Viruses - 0; Other Euk…	AT1G04200	dyggve-melchior-clausen syndrome protein	not assigned.unknown				978	919	1017	851	854	1161	833	706	770	1326	1014	999	532	848	643	1212	996	15.2412	15.0987	13.6397	18.5829	18.6307	19.2299	15.3799	12.1693	16.054	23.1702	20.6833	18.0285	12.8124	17.9038	13.2789	19.583	18.226	14.6599	18.8145	14.5344	20.6273	14.665	18.9045	0.886359
AT1G04210.1	Encodes a putative Raf-related kinase.	Leucine-rich repeat protein kinase family protein; FUNCTIONS IN: protein serine/threonine kinase activity, protein kinase activity, ATP binding; INVOLVED IN: protein amino acid phosphorylation; LOCATED IN: cellular_component unknown; CONTAINS InterPro DOMAIN/s: Protein kinase, catalytic domain (InterPro:IPR000719), Leucine-rich repeat (InterPro:IPR001611), Serine/threonine-protein kinase-like dom…	AT1G04210	Leucine-rich repeat protein kinase family protein	protein.postranslational modification				1407	1405	1623	966	991	1331	1037	836	941	1426	1150	1224	797	995	1070	1410	1158	14.1451	14.8852	14.0428	13.6063	13.9373	14.2119	12.3537	9.28969	12.6495	16.0322	15.1161	14.2425	12.3689	13.5491	14.2489	14.6947	13.6536	14.3577	13.9185	11.431	15.1303	13.389	14.1741	0.459683
AT1G04220.1	Encodes KCS2, a member of the 3-ketoacyl-CoA synthase family involved in the biosynthesis of VLCFA (very long chain fatty acids).	3-ketoacyl-CoA synthase 2 (KCS2); FUNCTIONS IN: fatty acid elongase activity; INVOLVED IN: response to wounding, response to osmotic stress, suberin biosynthetic process; LOCATED IN: membrane; EXPRESSED IN: 17 plant structures; EXPRESSED DURING: 6 growth stages; CONTAINS InterPro DOMAIN/s: Thiolase-like (InterPro:IPR016039), Very-long-chain 3-ketoacyl-CoA synthase (InterPro:IPR012392), 3-Oxoacyl-…	KCS2	3-ketoacyl-CoA synthase 2	lipid metabolism.FA synthesis and FA elongation.beta ketoacyl CoA synthase				1468	544	853	177	186	314	389	433	509	220	168	243	626	692	747.28	376	253	34.6592	13.5489	17.331	5.85665	6.15364	7.8873	10.8784	11.3187	16.0908	5.84645	5.19989	6.64871	22.8772	22.1416	23.3947	9.20614	7.02643	21.8464	6.63253	12.7626	5.89835	22.8045	8.11628	11.2562
AT1G04230.1		Protein of unknown function (DUF2361); CONTAINS InterPro DOMAIN/s: Protein of unknown function DUF2361 (InterPro:IPR019310); BEST Arabidopsis thaliana protein match is: Protein of unknown function (DUF2361) (TAIR:AT5G43720.1); Has 1174 Blast hits to 818 proteins in 194 species: Archae - 0; Bacteria - 26; Metazoa - 566; Fungi - 310; Plants - 87; Viruses - 6; Other Eukaryotes - 179 (source: NCBI BL…	AT1G04230	rRNA-processing EFG1-like protein (DUF2361)	not assigned.unknown				274	308	316	203	216	315	226	242	207	360	326	351	148	211	193	356	301	8.62371	10.2321	8.55837	8.9557	9.53563	10.5583	8.42299	8.44117	8.73022	12.8016	13.4719	12.8117	7.22145	9.00267	8.05947	11.6222	11.1631	9.13806	9.68321	8.53146	13.0284	8.09453	11.3926	0.94803
AT1G04240.1	SHY2/IAA3 regulates multiple auxin responses in roots. It is induced rapidly by IAA, and has been shown to be phosphorylated by oat phytochrome A in vitro.	SHORT HYPOCOTYL 2 (SHY2); FUNCTIONS IN: sequence-specific DNA binding transcription factor activity; INVOLVED IN: response to auxin stimulus, response to cyclopentenone, response to brassinosteroid stimulus; LOCATED IN: nucleus; EXPRESSED IN: 22 plant structures; EXPRESSED DURING: 13 growth stages; CONTAINS InterPro DOMAIN/s: Aux/IAA-ARF-dimerisation (InterPro:IPR011525), AUX/IAA protein (InterPr…	SHY2	AUX/IAA transcriptional regulator family protein	RNA.regulation of transcription.Aux/IAA family				3566	2316	3761.56	1491.67	1576	1730	1715.36	2023.52	2975	1881	1715.67	1246.91	2061	2175	2675.84	2967.42	2204	133.872	91.8163	121.512	78.5055	83.0515	69.2193	76.2426	84.2539	149.753	80.0184	84.6709	54.3181	120.098	110.718	133.346	115.573	97.6291	115.733	76.9254	103.416	73.0025	121.387	106.601	21.6151
AT1G04250.1	Transcription regulator acting as repressor of auxin-inducible gene expression. Auxin-inducible AUX/IAA gene. Short-lived nuclear protein with four conserved domains. Domain III has homology to beta alpha alpha dimerization and DNA binding domains. Involved in auxin signaling. Auxin induces the degradation of the protein in a dosage-dependent manner in a process mediated by AtRac1. Auxin induced …	AUXIN RESISTANT 3 (AXR3); CONTAINS InterPro DOMAIN/s: Aux/IAA-ARF-dimerisation (InterPro:IPR011525), AUX/IAA protein (InterPro:IPR003311); BEST Arabidopsis thaliana protein match is: indole-3-acetic acid inducible 14 (TAIR:AT4G14550.1); Has 1763 Blast hits to 1762 proteins in 78 species: Archae - 0; Bacteria - 0; Metazoa - 0; Fungi - 0; Plants - 1762; Viruses - 0; Other Eukaryotes - 1 (source: NC…	AXR3	AUX/IAA transcriptional regulator family protein	RNA.regulation of transcription.Aux/IAA family				2390	1517	2425	646	572	721	896	1090	1182	632	558	457	954	1123	1682	882	752	98.4469	66.0058	85.9505	37.3071	33.0887	31.6674	43.6913	49.8199	65.307	29.5515	30.2373	21.8508	61.0405	62.7332	91.9948	37.6952	36.5789	83.4677	34.0211	52.9394	27.2132	71.9228	37.1371	16.3624
AT1G04260.1	Encodes protein that interacts with CaMV movement protein. Colocalizes in the cytoplasm with the movement protein. Has similarity to mammalian proteins (such as the rat PRA1) which have been described as rab acceptors.	CAMV movement protein interacting protein 7 (MPI7); FUNCTIONS IN: protein binding; INVOLVED IN: vesicle-mediated transport, spread of virus in host; LOCATED IN: endoplasmic reticulum, cytoplasm; EXPRESSED IN: 23 plant structures; EXPRESSED DURING: 14 growth stages; CONTAINS InterPro DOMAIN/s: Prenylated rab acceptor PRA1 (InterPro:IPR004895); BEST Arabidopsis thaliana protein match is: prenylated…	MPI7	CAMV movement protein interacting protein 7	signalling.G-proteins				312	325	367	276	253	311	263	286	207	351	276	344	192	249	237	360	311	17.5097	19.2883	17.7207	21.7237	19.9773	18.6458	17.4647	17.8433	15.6059	22.5237	20.4375	22.4404	16.7859	18.9625	17.6811	20.9712	20.6791	18.1729	20.1156	16.9713	21.8005	17.8098	20.8252	0.971709
AT1G04270.1	Encodes cytosolic ribosomal protein S15.	cytosolic ribosomal protein S15 (RPS15); FUNCTIONS IN: structural constituent of ribosome; INVOLVED IN: translation; LOCATED IN: cytosolic small ribosomal subunit, cytosolic ribosome, plasma membrane; EXPRESSED IN: 24 plant structures; EXPRESSED DURING: 14 growth stages; CONTAINS InterPro DOMAIN/s: Ribosomal protein S15, eukaryotic/archaeal (InterPro:IPR005713), Ribosomal protein S19/S15 (InterPr…	RPS15	cytosolic ribosomal protein S15	protein.synthesis.ribosomal protein.eukaryotic.40S subunit.S15				8214.83	8279	9821	6359.21	6518.25	7218.51	6680	6883.22	5506	8061.51	6256.64	6800.19	4329.77	6212	8063	8207.31	6331.71	488.017	520.247	501.964	529.872	545.051	458.312	469.515	454.77	439.554	548.478	490.744	469.72	400.965	500.837	636.914	506.145	445.987	503.409	511.078	454.613	502.981	512.905	476.066	16.1635
AT1G04270.2	Encodes cytosolic ribosomal protein S15.	cytosolic ribosomal protein S15 (RPS15); FUNCTIONS IN: structural constituent of ribosome; INVOLVED IN: translation; LOCATED IN: cytosolic small ribosomal subunit, cytosolic ribosome, plasma membrane; EXPRESSED IN: 24 plant structures; EXPRESSED DURING: 14 growth stages; CONTAINS InterPro DOMAIN/s: Ribosomal protein S15, eukaryotic/archaeal (InterPro:IPR005713), Ribosomal protein S19/S15 (InterPr…	RPS15	cytosolic ribosomal protein S15	protein.synthesis.ribosomal protein.eukaryotic.40S subunit.S15				8.17412	0	0	2.79341	2.75172	5.48856	0	2.78474	0	8.48532	5.36496	2.81343	0	0	0	5.6878	5.28684	0.489369	0	0	0.234567	0.231897	0.351201	0	0.185425	0	0.581925	0.424111	0.195854	0	0	0	0.353495	0.375319	0.163123	0.272555	0.0618083	0.40063	0	0.364407	0.282537
AT1G04280.1		P-loop containing nucleoside triphosphate hydrolases superfamily protein; FUNCTIONS IN: ATP binding; INVOLVED IN: cell killing; LOCATED IN: membrane; EXPRESSED IN: leaf; CONTAINS InterPro DOMAIN/s: Zeta toxin (InterPro:IPR010488); BEST Arabidopsis thaliana protein match is: P-loop containing nucleoside triphosphate hydrolases superfamily protein (TAIR:AT1G06750.2); Has 195 Blast hits to 194 prote…	AT1G04280	P-loop containing nucleoside triphosphate hydrolases superfamily protein	not assigned.unknown				351	762	376	436	403	558	572	562	449	1082	739	735	362	520	443	652	481	7.62838	17.4675	7.03237	13.2794	12.2703	12.8992	14.7254	13.52	13.0634	26.4447	21.0475	18.5087	12.1732	15.3146	12.7646	14.6942	12.2917	10.7094	12.8163	13.7696	22.0003	13.4175	13.493	5.86025
AT1G04290.1		Thioesterase superfamily protein; FUNCTIONS IN: hydrolase activity, acting on ester bonds, acyl-CoA thioesterase activity; INVOLVED IN: biological_process unknown; LOCATED IN: peroxisome; EXPRESSED IN: 24 plant structures; EXPRESSED DURING: 15 growth stages; CONTAINS InterPro DOMAIN/s: Thioesterase superfamily (InterPro:IPR006683), Phenylacetic acid degradation-related protein (InterPro:IPR003736…	AT1G04290	Thioesterase superfamily protein	lipid metabolism.lipid degradation.beta-oxidation.acyl-CoA thioesterase				363.764	344.752	515.935	361.631	312.39	422.535	330.1	384.314	314.185	377.055	359.684	377.663	249.905	342.456	288.912	393.32	323.097	20.1507	20.1949	24.59	28.0951	24.3456	25.0029	21.6375	23.6648	23.3787	23.8744	26.286	24.3162	21.5627	25.7416	21.274	22.6155	21.2022	21.6452	25.8145	22.8937	24.8255	22.8594	21.9089	2.55037
AT1G04295.1	Potential natural antisense gene, locus overlaps with AT1G04290		AT1G04295	Natural antisense transcript overlaps with AT1G04290	micro RNA, natural antisense etc				10.2364	10.2476	14.0651	10.3688	5.61004	8.46518	2.90004	5.68555	2.81472	9.94471	4.31628	1.33721	9.09541	1.54442	6.08819	11.6803	12.9032	0.983889	1.04514	1.1632	1.39945	0.762746	0.873846	0.329521	0.61071	0.36499	1.11494	0.551972	0.150006	1.37314	0.201773	0.780578	1.16704	1.48308	1.06408	1.01201	0.435074	0.605639	0.785164	1.32506	0.091143
AT1G04300.1		TRAF-like superfamily protein; CONTAINS InterPro DOMAIN/s: TRAF-like (InterPro:IPR008974), MATH (InterPro:IPR002083), TRAF-type (InterPro:IPR013322); BEST Arabidopsis thaliana protein match is: TRAF-like superfamily protein (TAIR:AT5G43560.2); Has 16577 Blast hits to 11240 proteins in 949 species: Archae - 20; Bacteria - 1945; Metazoa - 5204; Fungi - 2178; Plants - 1117; Viruses - 112; Other Euka…	AT1G04300	TRAF-like superfamily protein	not assigned.no ontology				1604.73	1587.08	1372.2	1252.35	1159.55	1949.89	968.824	824.294	969.813	1980.78	1667.42	1774.03	873.638	1087.26	1221.78	1685.24	1327.29	18.0116	18.7738	13.2552	19.6943	18.2094	23.2481	12.885	10.2277	14.5567	24.8765	24.4752	23.049	15.1406	16.5302	18.1664	19.6091	17.4765	16.6802	20.3839	12.5565	24.1336	16.6124	18.5428	2.99052
[truncated: 41,365 more rows]
[truncated: 13 more columns]

## Sheet: SD2_Metabolites
Supplemental Dataset S2. Metabolite amounts in psp-17 and psp-18 mutants (n = 4, except psp-18 night: n = 3) grown at elevated CO2 and shifted to ambient CO2 24h before harvesting.
[truncated: 39 more rows]

## Sheet: SD3_AminoAcid_Metabolism
Supplemental Dataset S3. Quantitative information and annotation of genes involved in amino acid metabolism of Arabidopsis WT and psp mutants grown at elevated CO2 and shifted to ambient CO2 24h before harvesting.
[truncated: 149 more rows]
